# Supplementary material for: Prediction on chemoselectivity for selected organocatalytic reactions by the DFT version of the Hückel-defined free valence index
Source: Royal Society of Chemistry journal article supplement (doi:10.1039/d2cy01118b), 2022-01-01
Supplement: d2cy01118b1.pdf [file d2cy01118b1.pdf]

## Supporting Information

### Prediction on chemoselectivity for selected organocatalytic reactions by the DFT version of the Hückel-defined free valence index

Limin Guo,<sup>a</sup> Juanjuan Wang,<sup>bc</sup> Jing Luo,<sup>a</sup> Qianqian Shi,<sup>a</sup> Donghui Wei,<sup>\*a</sup> and Xuebo Chen<sup>\*ba</sup>

<sup>a</sup> College of Chemistry, and Institute of Green Catalysis, Zhengzhou University, 100 Science Avenue, Zhengzhou, Henan 450001, China

<sup>b</sup> Key Laboratory of Theoretical and Computational Photochemistry of the Ministry of Education, Department of Chemistry, Beijing Normal University, Xin-wai-da-jie No. 19, Beijing 100875, China

<sup>c</sup> Key Laboratory of Beam Technology of Ministry of Education, College of Nuclear Science and Technology, Beijing Normal University, Beijing 100875, China

Emails: donghuiwei@zzu.edu.cn (D. Wei); xuebochen@bnu.edu.cn (X. Chen).

### Table of Contents

|                                                                                                      |     |
|------------------------------------------------------------------------------------------------------|-----|
| Part 1: Computational methods .....                                                                  | S3  |
| Part 2: Additionally computational results .....                                                     | S4  |
| 2.1 Different bases assisted [1,2]-proton transfer processes .....                                   | S4  |
| 2.2 Other possible pathway to generate intermediate <b>M4</b> .....                                  | S5  |
| 2.3 Different conformers and configurations of $\epsilon$ - <b>TS4</b> .....                         | S6  |
| 2.4 Comparison of the active sites predicted by HFV, Mulliken charge and Parr function.              | S7  |
| Part 3: The occupied $\pi$ -type molecular orbitals and computational details of HFV .....           | S8  |
| 3.1 The occupied $\pi$ -type molecular orbitals of benchmark trimethylenemethane .....               | S8  |
| 3.1.1 Molecular orbital coefficients of benchmark trimethylenemethane.....                           | S9  |
| 3.1.2 Combined coefficients and computational details of $P_{\max}$ .....                            | S12 |
| 3.2 The occupied $\pi$ -type molecular orbitals associated with the active sites of <b>M3</b> .....  | S14 |
| 3.2.1 Molecular orbital coefficients of <b>M3</b> .....                                              | S15 |
| 3.2.2 Combined coefficients and computational details of HFV index (F) of <b>M3</b> .....            | S27 |
| 3.3 The occupied $\pi$ -type molecular orbitals associated with the active sites of <b>M1b</b> ..... | S28 |
| 3.3.1 Molecular orbital coefficients of <b>M1b</b> .....                                             | S29 |
| 3.3.2 Combined coefficients and computational details of HFV index (F) of <b>M1b</b> .....           | S42 |
| 3.4 The occupied $\pi$ -type molecular orbitals associated with the active sites of <b>M1c</b> ..... | S43 |
| 3.4.1 Molecular orbital coefficients of <b>M1c</b> .....                                             | S44 |
| 3.4.2 Combined coefficients and computational details of HFV index (F) of <b>M1c</b> .....           | S63 |

|                                                                                                      |     |
|------------------------------------------------------------------------------------------------------|-----|
| 3.5 The occupied $\pi$ -type molecular orbitals associated with the active sites of <b>1d</b> .....  | S64 |
| 3.5.1 Molecular orbital coefficients of <b>1d</b> .....                                              | S65 |
| 3.5.2 Combined coefficients and computational details of HFV index (F) of <b>1d</b> .....            | S71 |
| 3.6 The occupied $\pi$ -type molecular orbitals associated with the active sites of <b>1e</b> .....  | S72 |
| 3.6.1 Molecular orbital coefficients of <b>1e</b> .....                                              | S73 |
| 3.6.2 Combined coefficients and computational details of HFV index (F) of <b>1e</b> .....            | S77 |
| 3.7 The occupied $\pi$ -type molecular orbitals associated with the active sites of <b>III</b> ..... | S78 |
| 3.7.1 Molecular orbital coefficients of <b>III</b> .....                                             | S79 |
| 3.7.2 Combined coefficients and computational details of HFV index (F) of <b>III</b> .....           | S82 |
| Part 4: Absolute SPE, GFEC, and GFE of the optimized structures .....                                | S83 |
| Part 5: Cartesian coordinates of all the stationary points .....                                     | S86 |

## Part 1: Computational methods

All the geometries of the stationary points and frequencies (1 atm, 298 K) were optimized and calculated using B3LYP-D3<sup>1</sup> functional with 6-31G(d, p) basis set for main group atoms and Lan2LDZ basis set for Cs atom in tetrahydrofuran (THF) solvent using the SMD<sup>2</sup> for implicit solvation model in case study 1. The solvents are different among the several reaction models, *o*-dichlorobenzene solvent was selected in case study 2, toluene solvent was selected in case study 3, acetonitrile solvent was selected in case study 4, whereas the mixed solvent of acetonitrile and 1,2-dichloroethane (DCE) with the ratio of 1:1 was selected in case study 5 by using a dielectric constant value of 22.9, and other calculation settings are the same. Frequency calculations verify that all the reactants, products, catalysts, and intermediates have no imaginary frequency and each transition state that connects the two expected intermediates has only one imaginary frequency. All the energies discussed in the main text are the relative Gibbs free energies (GFE), which are obtained by the addition of the thermal Gibbs free energy corrections (GFEC) at the B3LYP-D3/6-31G(d, p)(Lan2LDZ for Cs)/SMD<sub>solvent</sub> level and the single-point energies (SPE) at a higher computational level of B3LYP-D3/6-311++G(2df, 2pd)(SDD for Cs)/SMD<sub>solvent</sub> (L1).

Herein, the different computational methods including B3LYP,<sup>3,4</sup> M06-2X,<sup>5,6</sup> and  $\omega$ B97X-D<sup>7</sup> were employed to check whether the selected method (L1) is reliable, the additional calculations by employing other different DFT methods and basis sets, i.e., B3LYP-D3/6-311++G(2df, 2pd)/SMD<sub>THF</sub>//B3LYP/6-31G(d, p)/SMD<sub>THF</sub>(L2), M06-2X/6-311++G(2df, 2pd)/SMD<sub>THF</sub>//M06-2X/6-31G(d, p)/SMD<sub>THF</sub> (L3), and  $\omega$ B97X-D/6-311++G(2df, 2pd)/SMD<sub>THF</sub>// $\omega$ B97X-D/6-31G(d, p)/SMD<sub>THF</sub> (L4) have been performed for the key transition state  $\epsilon$ -TS4 involved in the chemoselectivity-determining step of case study 1, and the computed and tested results can be found in the Table S1. There are small differences between the calculated results obtained by L1~L4, but the trend and conclusions should be the same, indicating the computational method is reliable.

**Table S1.** Comparison of relative Gibbs free energies of the key step calculated by using different levels L1~L4. (Unit: kcal/mol).

|                 | L1   | L2   | L3   | L4   |
|-----------------|------|------|------|------|
| M3              | 0.0  | 0.0  | 0.0  | 0.0  |
| $\epsilon$ -TS4 | 13.1 | 13.1 | 14.6 | 14.7 |

## Part 2: Additionally computational results

### 2.1 Different bases assisted [1,2]-proton transfer processes

Fig. S1 depicts the energy profiles of the [1,2]-proton transfer processes for the formation of the Breslow intermediate **M2** assisted by different bases. As shown in Fig. S1, the energy barrier for [Cs]HCO<sub>3</sub> assisted [1,2]-proton transfer process via transition state **TS2** is 10.6 kcal/mol. Moreover, we investigated the THF-coordinated [Cs]HCO<sub>3</sub> assisted [1,2]-proton transfer processes. The calculated results show that the [1,2]-proton transfer process assisted by [Cs]HCO<sub>3</sub>-THF occurs via the transition state **TS2'** with an energy barrier of 12.1 kcal/mol. While the [Cs]HCO<sub>3</sub>-2THF assisted [1,2]-proton transfer process occurs via the transition state **TS2''** with an energy barrier of 11.6 kcal/mol. The result indicates that the coordination of more THF molecules would not lower the energy barrier of the [1,2]-proton transfer process. The energy barrier for HCO<sub>3</sub><sup>-</sup> assisted [1,2]-proton transfer process via transition state **TS2'''** is 16.4 kcal/mol, which is much higher than that of transition state **TS2**, so we can exclude this pathway safely.

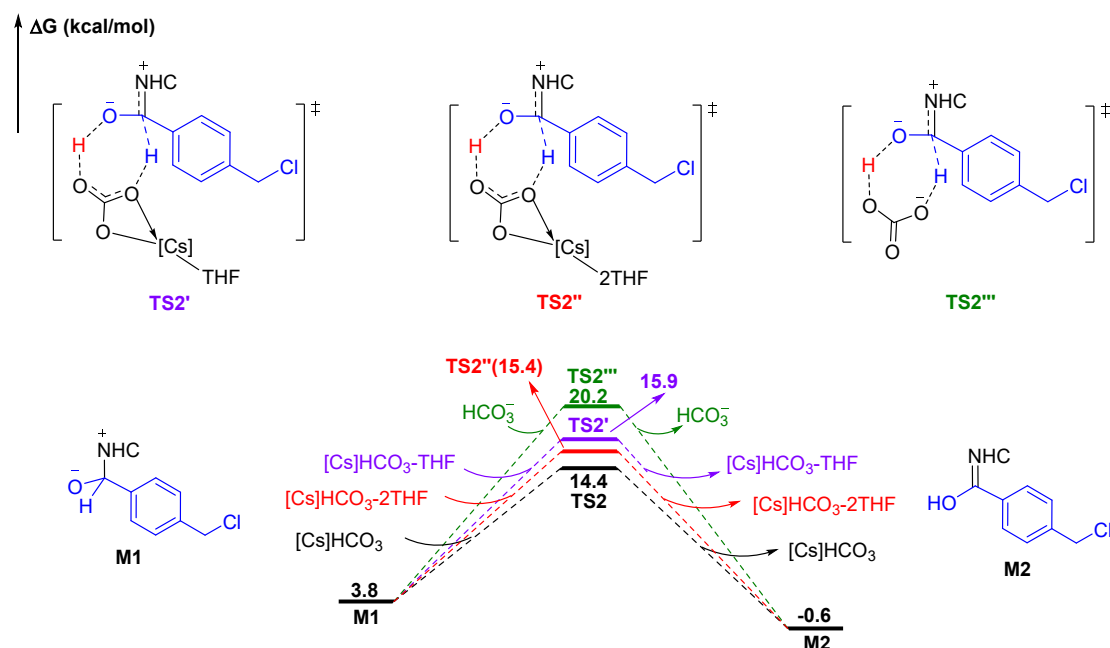

Fig. S1. Different bases assisted [1,2]-proton transfer processes



## 2.3 Different conformers and configurations of $\epsilon$ -TS4

To ensure the selected and discussed configuration of the transition state  $\epsilon$ -TS4 with the lowest energy in the main text, we have searched multiple possible conformations for the fourth step. By rotating the dihedral angle  $\Phi(\text{C}\delta\text{-C}\epsilon\text{-C1-C2})$  with  $60^\circ$  per time in transition state  $\epsilon$ -TS4 of case study 1, we have totally constructed four conformations as the initial structures, which have been subsequently optimized the structures and refined the single-point energies at the B3LYP-D3/6-31G(d, p)/SMD<sub>THF</sub> and B3LYP-D3/6-311++G(2df, 2pd)/SMD<sub>THF</sub> level, respectively. After the optimization, the corresponding dihedral angles  $\Phi(\text{C}\delta\text{-C}\epsilon\text{-C1-C2})$  change to  $-60^\circ/171^\circ/-161^\circ/78^\circ$ . As revealed by Fig. S3, the most stable conformation with the lowest energy of the chemoselective transition state is associated with the dihedral angle  $\Phi(\text{C}\delta\text{-C}\epsilon\text{-C1-C2})$  of  $-60^\circ$ .

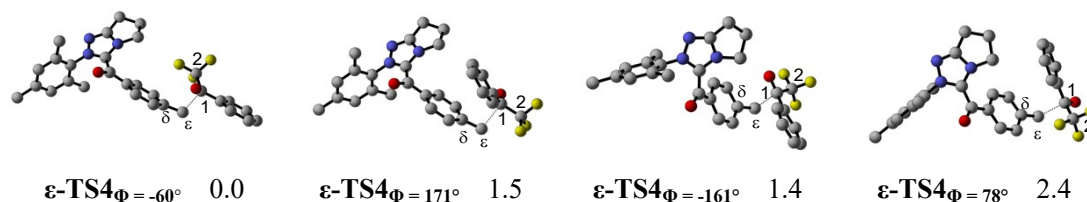

**Fig. S3.** Different configurations and relative energies of the transition state  $\epsilon$ -TS4 with different dihedral angles  $\Phi(\text{C}\delta\text{-C}\epsilon\text{-C1-C2})$  (energy in kcal/mol).

## 2.4 Comparison of the active sites predicted by HFV, Mulliken charge and Parr function

We have additionally calculated Mulliken charge and local reactivity indexes Parr function<sup>8,9</sup> of the key atoms in the active intermediates of the three non-radical reactions, and then added a comparison of HFV index with them in Table S2. As summarized in Table S2, the actual sites of nucleophiles **M3** and **M1b** should have the more negative Mulliken charge values, which can also be used for explaining and predicting the experiments. However, the Mulliken charge values of the atoms in **M1c** cannot be used for predicting the real active site, which is due to the tiny difference between the Mulliken charge values of the two active sites. In addition, the nucleophilic Parr function values ( $P_k^-$ ) also have the same trends with the HFV indexes in the three cases. Noteworthy, we did not additionally consider the radical reactions, in which the nucleophilic and electrophilic were not clearly identified before.

**Table S2.** Comparison of the active sites predicted by HFV, Mulliken charge and nucleophilic Parr function ( $P_k^-$ ). Green circles represent the high active sites and red circles represent the low active sites.

| Reactants or intermediates                                                                                        | Active sites                       | HFV                  | Mulliken charge(e)        | Parr function $P_k^-$   |
|-------------------------------------------------------------------------------------------------------------------|------------------------------------|----------------------|---------------------------|-------------------------|
| 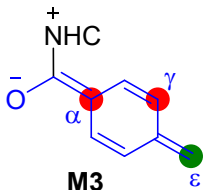 <p><b>M3</b></p>              | $\alpha$<br>$\gamma$<br>$\epsilon$ | 0.68<br>0.94<br>1.17 | 0.015<br>-0.205<br>-0.426 | 0.221<br>0.222<br>0.682 |
|  <p><b>dienolate M1b</b></p>   | $\alpha$<br>$\gamma$               | 1.01<br>1.09         | -0.263<br>-0.371          | 0.458<br>0.570          |
|  <p><b>Z-dienamine M1c</b></p> | $\alpha$<br>$\gamma$               | 0.91<br>0.97         | -0.144<br>-0.121          | 0.362<br>0.470          |

## Part 3: The occupied $\pi$ -type molecular orbitals and computational details of HFV

### 3.1 The occupied $\pi$ -type molecular orbitals of benchmark trimethylenemethane

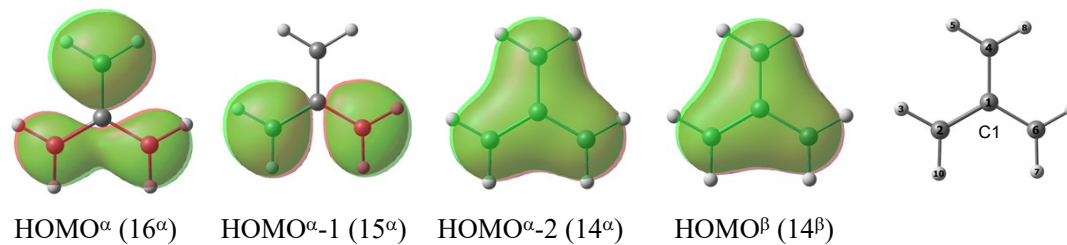

**Fig. S4.** The occupied  $\pi$ -type molecular orbitals of benchmark trimethylenemethane.



### 3.1.1 Molecular orbital coefficients of benchmark trimethylenemethane

|     |     | 14 <sup>α</sup> | 15 <sup>α</sup> | 16 <sup>α</sup> | 14 <sup>β</sup> |
|-----|-----|-----------------|-----------------|-----------------|-----------------|
| 1C  | 1S  | -0.00003        | -0.00001        | -0.00002        | -0.00003        |
|     | 2S  | 0.00006         | 0.00001         | 0.00005         | 0.00006         |
|     | 2PX | -0.00045        | -0.00001        | -0.00003        | -0.00017        |
|     | 2PY | -0.00032        | 0.00001         | -0.00011        | -0.00017        |
|     | 2PZ | 0.34768         | 0.00001         | 0               | 0.44339         |
|     | 3S  | 0.00005         | 0               | -0.00001        | 0.00005         |
|     | 3PX | -0.00007        | -0.00011        | -0.00011        | -0.00005        |
|     | 3PY | -0.00001        | -0.00002        | 0.00001         | 0.00001         |
|     | 3PZ | 0.17758         | 0               | 0               | 0.27561         |
|     | 4XX | 0.00001         | 0               | 0.00001         | 0.00001         |
|     | 4YY | -0.00001        | 0               | -0.00001        | -0.00001        |
|     | 4ZZ | -0.00001        | 0               | 0               | -0.00001        |
|     | 4XY | -0.00004        | 0               | -0.00003        | -0.00002        |
|     | 4XZ | 0               | -0.02888        | 0.0044          | 0               |
|     | 4YZ | 0               | -0.0044         | -0.02887        | 0               |
|     | 2C  | 1S              | -0.00003        | 0.00002         | -0.00003        |
| 2S  |     | 0.00008         | -0.00005        | 0.00009         | 0.00003         |
| 2PX |     | 0.00031         | -0.00004        | 0.00009         | 0.00008         |
| 2PY |     | -0.00015        | -0.00005        | -0.00004        | -0.0001         |
| 2PZ |     | 0.25573         | 0.44775         | -0.23596        | 0.18993         |
| 3S  |     | 0.00017         | -0.00015        | 0.00011         | 0.00007         |
| 3PX |     | 0.00011         | -0.00005        | -0.00002        | 0               |
| 3PY |     | -0.00011        | -0.00001        | 0.00004         | -0.00006        |
| 3PZ |     | 0.16925         | 0.38413         | -0.20244        | 0.12713         |
| 4XX |     | 0               | 0               | 0               | 0               |
| 4YY |     | -0.00001        | 0               | -0.00001        | 0               |
| 4ZZ |     | 0               | 0               | 0               | 0.00001         |
| 4XY |     | -0.00002        | 0               | 0               | 0               |
| 4XZ |     | 0.01272         | 0.00057         | -0.00187        | 0.01465         |
| 4YZ |     | -0.00441        | -0.00229        | -0.00332        | -0.00508        |
| 3C  |     | 1S              | 0.00007         | -0.00001        | 0.00003         |
|     | 2S  | -0.00015        | 0.00001         | -0.00007        | -0.00008        |
|     | 2PX | 0.00029         | -0.00001        | 0.00006         | 0.0001          |
|     | 2PY | 0.00044         | 0.00001         | 0.00013         | 0.00018         |
|     | 2PZ | 0.25573         | -0.42821        | -0.2698         | 0.18992         |
|     | 3S  | -0.00031        | 0.00009         | -0.00011        | -0.00016        |
|     | 3PX | 0.00015         | -0.00002        | 0.00003         | 0.00006         |
|     | 3PY | 0.00018         | -0.00001        | 0               | 0.00005         |
|     | 3PZ | 0.16925         | -0.36738        | -0.23148        | 0.12713         |
|     | 4XX | 0               | 0               | 0               | 0               |
|     | 4YY | 0.00002         | 0               | 0.00002         | 0.00001         |
|     | 4ZZ | 0               | 0               | 0               | 0               |

|     |     |          |          |          |          |
|-----|-----|----------|----------|----------|----------|
|     | 4XY | -0.00002 | 0        | 0        | 0        |
|     | 4XZ | -0.01018 | -0.00054 | 0.00293  | -0.01173 |
|     | 4YZ | -0.00881 | 0.00252  | -0.0022  | -0.01015 |
| 4C  | 1S  | 0.00003  | 0.00001  | 0.00007  | 0.00004  |
|     | 2S  | -0.00007 | 0        | -0.00016 | -0.00007 |
|     | 2PX | 0.0008   | -0.00001 | 0.00046  | 0.00045  |
|     | 2PY | 0.00038  | 0        | 0.00022  | 0.0002   |
|     | 2PZ | 0.25575  | -0.01954 | 0.50572  | 0.18995  |
|     | 3S  | -0.00004 | -0.00012 | -0.00032 | -0.00003 |
|     | 3PX | 0.0003   | 0.00009  | 0.0004   | 0.00018  |
|     | 3PY | 0.0002   | 0.00007  | 0.00024  | 0.00013  |
|     | 3PZ | 0.16927  | -0.01677 | 0.43389  | 0.12715  |
|     | 4XX | 0.00001  | 0        | 0.00001  | 0        |
|     | 4YY | -0.00001 | 0        | 0.00001  | -0.00001 |
|     | 4ZZ | 0        | 0        | 0        | 0.00001  |
|     | 4XY | -0.00005 | 0        | 0        | -0.00002 |
|     | 4XZ | -0.00254 | -0.00415 | -0.00044 | -0.00293 |
|     | 4YZ | 0.01322  | -0.00085 | 0.0014   | 0.01523  |
| 5H  | 1S  | -0.00006 | 0.00002  | -0.00005 | -0.00004 |
|     | 2S  | -0.00006 | 0.00001  | -0.00011 | -0.00006 |
|     | 3PX | 0.00001  | 0        | 0        | 0        |
|     | 3PY | 0        | 0        | 0        | 0        |
|     | 3PZ | 0.00515  | 0.01078  | -0.00649 | 0.00484  |
| 6H  | 1S  | -0.00009 | 0.00002  | 0        | -0.00001 |
|     | 2S  | -0.00017 | 0.00004  | -0.00007 | -0.00007 |
|     | 3PX | 0        | 0        | 0        | 0        |
|     | 3PY | 0        | 0        | 0        | 0        |
|     | 3PZ | 0.00515  | 0.01144  | -0.00523 | 0.00484  |
| 7H  | 1S  | 0.00021  | 0        | 0.00006  | 0.00009  |
|     | 2S  | 0.00024  | -0.00001 | 0.00014  | 0.00013  |
|     | 3PX | 0.00001  | 0        | 0        | 0        |
|     | 3PY | 0        | 0        | 0        | 0        |
|     | 3PZ | 0.00515  | -0.01025 | -0.0073  | 0.00484  |
| 8H  | 1S  | 0.00004  | 0        | -0.00002 | -0.00001 |
|     | 2S  | 0.00008  | -0.00001 | 0.00001  | 0.00001  |
|     | 3PX | 0        | 0        | 0        | 0        |
|     | 3PY | 0.00001  | 0        | 0        | 0        |
|     | 3PZ | 0.00515  | -0.01101 | -0.00609 | 0.00485  |
| 9H  | 1S  | 0.00037  | 0        | 0.00009  | 0.0002   |
|     | 2S  | 0.00039  | 0        | 0.00011  | 0.00023  |
|     | 3PX | 0        | 0        | 0.00001  | 0        |
|     | 3PY | 0.00001  | 0        | 0.00001  | 0.00001  |
|     | 3PZ | 0.00515  | -0.0012  | 0.01252  | 0.00485  |
| 10H | 1S  | -0.00042 | 0.00001  | 0.00008  | -0.00025 |

|     |          |         |         |         |
|-----|----------|---------|---------|---------|
| 2S  | -0.00046 | 0.00016 | 0.0001  | -0.0003 |
| 3PX | 0        | 0       | 0.00002 | 0       |
| 3PY | 0        | 0       | 0.00001 | 0       |
| 3PZ | 0.00515  | 0.00023 | 0.01258 | 0.00485 |

### 3.1.2 Combined coefficients and computational details of $P_{\max}$

$|c_{ki}|$  and  $|c_{kj}|$  are absolute values of the normalized combination coefficients of the  $i$  and  $j$  atoms, respectively, and they were calculated as the arithmetic square root of the values obtained by the squares of all the orbital coefficients of  $i$  or  $j$  atoms dividing the sum of the squares of all the atomic orbital coefficients in the  $k_{th}$  occupied  $\pi$ -type molecular orbital.

**Table S3.** Combined coefficients  $|c_{ki}|/|c_{kj}|$  after normalization of the  $i$  and  $j$  atoms in the  $k_{th}$  occupied  $\pi$ -type molecular orbital of benchmark trimethylenemethane

| $i/j \backslash  c_{ki} / c_{kj} $ | $k$ | 14 <sup><math>\alpha</math></sup> | 15 <sup><math>\alpha</math></sup> | 16 <sup><math>\alpha</math></sup> | 14 <sup><math>\beta</math></sup> |
|------------------------------------|-----|-----------------------------------|-----------------------------------|-----------------------------------|----------------------------------|
| 1                                  |     | 0.5917                            | 0.0357                            | 0.0357                            | 0.7960                           |
| 2                                  |     | 0.4653                            | 0.7216                            | 0.3803                            | 0.3493                           |
| 3                                  |     | 0.4653                            | 0.6901                            | 0.4348                            | 0.3493                           |
| 4                                  |     | 0.4653                            | 0.4500                            | 0.6803                            | 0.3493                           |

In common structural chemistry and related literature reports, it is believed that the theoretically existing central carbon atom of trimethylenemethane<sup>10</sup> has the largest  $\pi$  bond order of 1.73,<sup>11</sup> which is obtained in the HMO method. Herein, we used the maximum  $\pi$  bond order  $P_{\max} = 1.76$  of the center carbon atom of the trimethylenemethane at the B3LYP-D3/6-31G(d, p) level depicted in Scheme 1, and this value is slightly higher than that one (1.73) in the corresponding HMO calculation.

**Table S4.** The computational details of  $P_{\max}$

| Active site | $\pi$ Bond | $\pi$ -Type molecular orbitals with $\delta_k$ in parentheses                                                                                             | $\pi$ Bond order (P) | $\Sigma P$ | $P_{\max}$ |
|-------------|------------|-----------------------------------------------------------------------------------------------------------------------------------------------------------|----------------------|------------|------------|
| C1 (1)      | 1-2        | 14 <sup><math>\alpha</math></sup> (1), 15 <sup><math>\alpha</math></sup> (1), 16 <sup><math>\alpha</math></sup> (1), 14 <sup><math>\beta</math></sup> (1) | 0.59 <sup>a</sup>    | 1.76       | 1.76       |
|             | 1-3        | 14 <sup><math>\alpha</math></sup> (1), 15 <sup><math>\alpha</math></sup> (1), 16 <sup><math>\alpha</math></sup> (1), 14 <sup><math>\beta</math></sup> (1) | 0.59 <sup>b</sup>    |            |            |
|             | 1-4        | 14 <sup><math>\alpha</math></sup> (1), 16 <sup><math>\alpha</math></sup> (1), 14 <sup><math>\beta</math></sup> (1)                                        | 0.58 <sup>c</sup>    |            |            |

a :  $P_{1,2} = 0.5917 * 0.4653 + 0.0357 * 0.7216 + 0.0357 * 0.3803 + 0.7960 * 0.3493 = 0.59$

b :  $P_{1,3} = 0.5917 * 0.4653 + 0.0357 * 0.6901 + 0.0357 * 0.4348 + 0.7960 * 0.3493 = 0.59$

c :  $P_{1,4} = 0.5917 * 0.4653 + 0.0357 * 0.6803 + 0.0357 * 0.3493 = 0.58$

## Reference

1. S. Grimme, J. Antony, S. Ehrlich and H. Krieg, A consistent and accurate ab initio parametrization of density functional dispersion correction (DFT-D) for the 94 elements H-Pu, *J. Chem. Phys.*, 2010, **132**, 154104.
2. A. V. Marenich, C. J. Cramer and D. G. Truhlar, Universal Solvation Model Based on Solute Electron Density and on a Continuum Model of the Solvent Defined by the Bulk Dielectric Constant and Atomic Surface Tensions, *J. Phys. Chem. B*, 2009, **113**, 6378-6396.
3. C. Lee, W. Yang and R. G. Parr, Development of the Colle-Salvetti correlation-energy formula into a functional of the electron density, *Phys. Rev. B*, 1988, **37**, 785-789.
4. A. D. Becke, Density-functional thermochemistry. III. The role of exact exchange, *J. Chem. Phys.*, 1993, **98**, 5648-5652.
5. Y. Zhao and D. G. Truhlar, Density Functionals with Broad Applicability in Chemistry, *Acc. Chem. Res.*, 2008, **41**, 157-167.
6. Y. Zhao and D. G. Truhlar, The M06 suite of density functionals for main group thermochemistry, thermochemical kinetics, noncovalent interactions, excited states, and transition elements: two new functionals and systematic testing of four M06-class functionals and 12 other functionals, *Theor. Chem. Acc.*, 2008, **120**, 215-241.
7. J.-D. Chai and M. Head-Gordon, Long-range corrected hybrid density functionals with damped atom-atom dispersion corrections, *Phys. Chem. Chem. Phys.*, 2008, **10**, 6615-6620.
8. L. R. Domingo, P. Pérez and J. A. Sáez, Understanding the local reactivity in polar organic reactions through electrophilic and nucleophilic Parr functions, *RSC Adv.*, 2013, **3**, 1486-1494.
9. L. R. Domingo, M. Ríos-Gutiérrez and P. Pérez, Applications of the Conceptual Density Functional Theory Indices to Organic Chemistry Reactivity, *Molecules*, 2016, **21**(6), 748.
10. P. Dowd, Trimethylenemethane, *Acc. Chem. Res.*, 1972, **5**, 242-248.
11. C. Finder, Index of free valences, *J. Org. Chem.*, 1967, **32**, 1672-1673.

### 3.2 The occupied $\pi$ -type molecular orbitals associated with the active sites of M3

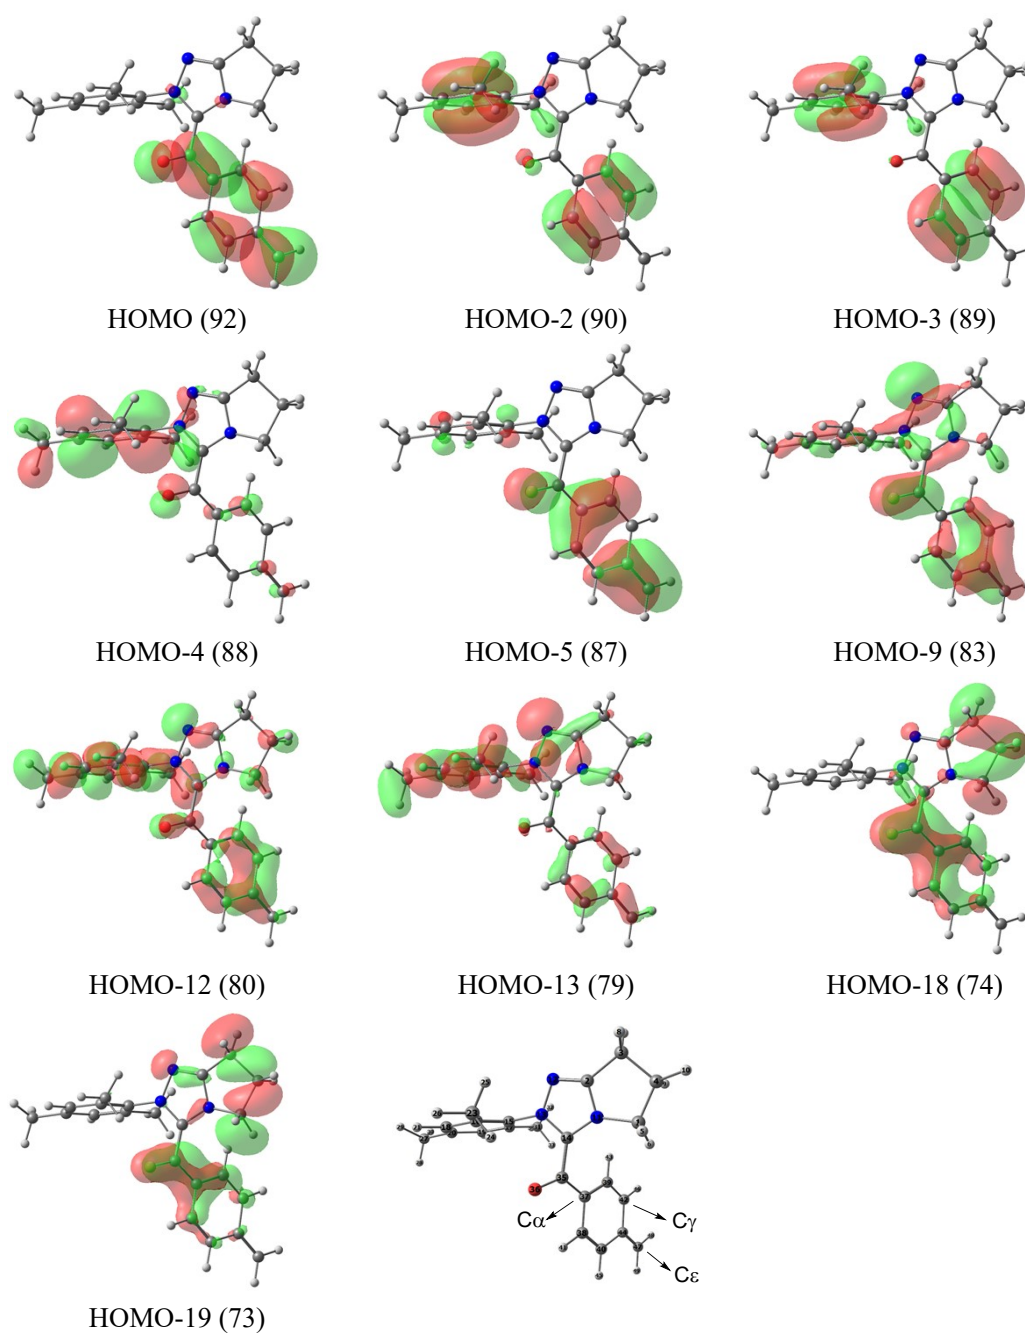

**Fig. S5.** The occupied  $\pi$ -type molecular orbitals associated with the active sites of M3.

### 3.2.1 Molecular orbital coefficients of M3

|   |   |     | 73      | 74      | 79      | 80      | 83      | 87      | 88      | 89      | 90      | 92      |
|---|---|-----|---------|---------|---------|---------|---------|---------|---------|---------|---------|---------|
| 1 | C | 1S  | 0.0137  | -0.0046 | -0.0016 | 0.0039  | 0.0011  | -0.0046 | -0.0009 | -0.0028 | 0.0028  | 0.0014  |
|   |   | 2S  | -0.0333 | 0.0165  | 0.0040  | -0.0095 | -0.0046 | 0.0089  | 0.0022  | 0.0042  | -0.0045 | -0.0050 |
|   |   | 2PX | 0.0698  | -0.0731 | -0.0445 | -0.0094 | 0.0556  | 0.0133  | -0.0173 | 0.0138  | -0.0055 | -0.0013 |
|   |   | 2PY | -0.2365 | 0.1427  | -0.0253 | 0.0197  | -0.0284 | -0.0261 | -0.0022 | -0.0136 | 0.0120  | 0.0060  |
|   |   | 2PZ | 0.0826  | -0.1145 | -0.0322 | 0.0732  | -0.0155 | -0.0051 | 0.0017  | -0.0081 | 0.0057  | -0.0021 |
|   |   | 3S  | -0.0443 | -0.0045 | 0.0304  | -0.0229 | -0.0179 | 0.0321  | 0.0036  | 0.0287  | -0.0263 | -0.0065 |
|   |   | 3PX | 0.0171  | -0.0251 | -0.0211 | -0.0121 | 0.0354  | 0.0241  | -0.0174 | 0.0255  | -0.0161 | 0.0043  |
|   |   | 3PY | -0.1275 | 0.0601  | -0.0176 | 0.0174  | -0.0154 | -0.0016 | -0.0028 | -0.0117 | 0.0092  | -0.0389 |
|   |   | 3PZ | 0.0442  | -0.0458 | -0.0220 | 0.0384  | -0.0066 | -0.0148 | 0.0013  | -0.0065 | 0.0063  | 0.0157  |
|   |   | 4XX | 0.0055  | -0.0015 | 0.0014  | -0.0020 | 0.0034  | 0.0004  | 0.0003  | 0.0003  | 0.0000  | -0.0012 |
|   |   | 4YY | -0.0008 | 0.0056  | 0.0028  | -0.0037 | -0.0026 | -0.0008 | -0.0006 | -0.0004 | 0.0004  | 0.0000  |
|   |   | 4ZZ | -0.0019 | -0.0045 | -0.0034 | 0.0061  | -0.0019 | -0.0005 | 0.0004  | -0.0009 | 0.0007  | 0.0008  |
|   |   | 4XY | -0.0061 | 0.0057  | 0.0040  | 0.0013  | -0.0045 | -0.0006 | 0.0002  | -0.0007 | 0.0004  | -0.0001 |
|   |   | 4XZ | -0.0008 | 0.0029  | 0.0000  | 0.0012  | -0.0015 | 0.0000  | 0.0006  | -0.0005 | 0.0002  | 0.0015  |
|   |   | 4YZ | 0.0074  | -0.0030 | 0.0001  | 0.0008  | -0.0001 | 0.0007  | 0.0002  | 0.0001  | -0.0002 | 0.0004  |
| 2 | C | 1S  | -0.0176 | -0.0012 | -0.0213 | 0.0149  | 0.0231  | -0.0020 | -0.0057 | 0.0001  | 0.0007  | -0.0011 |
|   |   | 2S  | 0.0429  | 0.0028  | 0.0545  | -0.0381 | -0.0582 | 0.0063  | 0.0143  | -0.0001 | -0.0021 | 0.0011  |
|   |   | 2PX | 0.0032  | -0.0047 | -0.0671 | 0.0694  | 0.1148  | -0.0067 | -0.0228 | 0.0036  | 0.0106  | 0.0066  |
|   |   | 2PY | -0.0346 | -0.0060 | 0.0176  | 0.0252  | -0.0108 | -0.0045 | -0.0252 | 0.0017  | -0.0017 | -0.0038 |
|   |   | 2PZ | -0.0212 | -0.0624 | -0.0411 | 0.0149  | -0.0062 | -0.0052 | -0.0306 | -0.0030 | 0.0009  | 0.0224  |
|   |   | 3S  | 0.0541  | 0.0001  | 0.0312  | -0.0361 | -0.0561 | 0.0026  | 0.0438  | -0.0063 | -0.0046 | 0.0232  |
|   |   | 3PX | 0.0430  | -0.0029 | 0.0254  | 0.0006  | -0.0032 | -0.0077 | -0.0247 | 0.0067  | 0.0075  | 0.0038  |
|   |   | 3PY | -0.0005 | -0.0024 | 0.0183  | 0.0030  | -0.0109 | -0.0084 | -0.0154 | 0.0050  | -0.0012 | 0.0101  |
|   |   | 3PZ | -0.0019 | -0.0366 | -0.0076 | 0.0012  | -0.0301 | -0.0069 | -0.0213 | -0.0009 | 0.0047  | 0.0183  |
|   |   | 4XX | 0.0015  | -0.0026 | -0.0093 | 0.0042  | 0.0069  | 0.0008  | 0.0016  | -0.0006 | -0.0003 | 0.0028  |
|   |   | 4YY | -0.0026 | 0.0016  | 0.0047  | 0.0005  | -0.0045 | -0.0008 | -0.0030 | 0.0003  | 0.0003  | -0.0014 |
|   |   | 4ZZ | -0.0031 | 0.0001  | -0.0020 | 0.0001  | 0.0050  | -0.0003 | -0.0001 | 0.0002  | 0.0000  | -0.0018 |
|   |   | 4XY | 0.0104  | -0.0044 | 0.0102  | -0.0065 | -0.0096 | -0.0004 | -0.0013 | 0.0004  | 0.0002  | -0.0016 |
|   |   | 4XZ | -0.0005 | 0.0004  | -0.0044 | 0.0010  | 0.0111  | -0.0004 | 0.0018  | 0.0001  | 0.0001  | -0.0017 |
|   |   | 4YZ | 0.0058  | -0.0020 | 0.0017  | 0.0009  | 0.0007  | 0.0004  | 0.0011  | 0.0000  | 0.0001  | 0.0001  |
| 3 | C | 1S  | -0.0097 | 0.0089  | -0.0014 | 0.0023  | 0.0019  | -0.0001 | 0.0038  | -0.0011 | 0.0002  | 0.0021  |
|   |   | 2S  | 0.0258  | -0.0210 | 0.0014  | -0.0051 | -0.0038 | -0.0005 | -0.0073 | 0.0022  | -0.0004 | -0.0021 |
|   |   | 2PX | 0.2402  | -0.1566 | -0.0341 | -0.0355 | 0.0191  | 0.0109  | 0.0080  | 0.0031  | -0.0057 | 0.0005  |
|   |   | 2PY | -0.0867 | 0.0510  | -0.0464 | 0.0126  | 0.0419  | 0.0033  | 0.0222  | -0.0038 | -0.0001 | 0.0076  |
|   |   | 2PZ | 0.1121  | -0.1176 | -0.0066 | 0.0293  | 0.0183  | 0.0031  | 0.0069  | 0.0015  | -0.0009 | -0.0039 |
|   |   | 3S  | 0.0172  | -0.0306 | 0.0110  | -0.0080 | -0.0085 | 0.0078  | -0.0193 | 0.0030  | -0.0002 | -0.0314 |
|   |   | 3PX | 0.1182  | -0.0778 | -0.0152 | -0.0190 | 0.0118  | 0.0067  | 0.0075  | 0.0023  | -0.0034 | -0.0016 |
|   |   | 3PY | -0.0227 | 0.0246  | -0.0180 | 0.0009  | 0.0180  | -0.0008 | 0.0144  | -0.0016 | -0.0006 | 0.0159  |
|   |   | 3PZ | 0.0454  | -0.0548 | -0.0070 | 0.0163  | 0.0211  | 0.0052  | 0.0018  | 0.0019  | -0.0040 | -0.0074 |
|   |   | 4XX | 0.0093  | -0.0069 | 0.0001  | -0.0016 | -0.0014 | 0.0005  | 0.0007  | 0.0000  | -0.0005 | -0.0002 |
|   |   | 4YY | -0.0013 | 0.0015  | 0.0007  | 0.0012  | 0.0007  | 0.0000  | 0.0000  | 0.0001  | 0.0002  | 0.0000  |
|   |   | 4ZZ | -0.0093 | 0.0064  | -0.0013 | 0.0005  | 0.0007  | -0.0004 | 0.0002  | -0.0004 | 0.0003  | 0.0004  |

|    |   |     |         |         |         |         |         |         |         |         |         |         |
|----|---|-----|---------|---------|---------|---------|---------|---------|---------|---------|---------|---------|
|    |   | 4XY | 0.0017  | 0.0011  | 0.0034  | -0.0010 | -0.0024 | 0.0004  | -0.0004 | 0.0002  | -0.0003 | -0.0004 |
|    |   | 4XZ | -0.0012 | 0.0062  | 0.0011  | -0.0034 | -0.0003 | -0.0001 | 0.0001  | 0.0000  | 0.0000  | -0.0003 |
|    |   | 4YZ | 0.0036  | -0.0023 | 0.0003  | 0.0013  | 0.0014  | 0.0005  | 0.0016  | 0.0002  | -0.0001 | -0.0009 |
| 4  | C | 1S  | -0.0035 | 0.0014  | -0.0015 | 0.0037  | 0.0045  | 0.0019  | -0.0003 | 0.0005  | 0.0000  | -0.0011 |
|    |   | 2S  | 0.0066  | -0.0040 | 0.0065  | -0.0105 | -0.0124 | -0.0016 | 0.0002  | -0.0011 | -0.0002 | -0.0038 |
|    |   | 2PX | -0.2044 | 0.1355  | 0.0225  | 0.0404  | -0.0003 | -0.0075 | -0.0061 | -0.0019 | 0.0054  | 0.0016  |
|    |   | 2PY | 0.1940  | -0.0616 | 0.0178  | -0.0090 | 0.0216  | 0.0156  | 0.0024  | 0.0050  | -0.0051 | -0.0026 |
|    |   | 2PZ | -0.0896 | 0.1835  | 0.0327  | -0.0644 | -0.0105 | -0.0053 | -0.0053 | 0.0001  | 0.0011  | 0.0018  |
|    |   | 3S  | 0.0210  | 0.0084  | -0.0074 | -0.0104 | -0.0071 | -0.0233 | 0.0020  | -0.0023 | 0.0016  | 0.0445  |
|    |   | 3PX | -0.0836 | 0.0565  | 0.0183  | 0.0147  | -0.0029 | -0.0051 | -0.0067 | -0.0021 | 0.0048  | -0.0048 |
|    |   | 3PY | 0.0788  | -0.0283 | 0.0173  | -0.0100 | 0.0030  | 0.0153  | -0.0001 | 0.0027  | -0.0039 | -0.0192 |
|    |   | 3PZ | -0.0288 | 0.0862  | 0.0192  | -0.0359 | -0.0082 | -0.0104 | -0.0025 | -0.0010 | 0.0024  | 0.0106  |
|    |   | 4XX | 0.0123  | -0.0088 | -0.0008 | -0.0009 | 0.0010  | 0.0006  | -0.0005 | 0.0003  | -0.0002 | -0.0008 |
|    |   | 4YY | -0.0071 | 0.0098  | 0.0019  | -0.0029 | 0.0004  | 0.0002  | 0.0001  | 0.0002  | -0.0002 | 0.0002  |
|    |   | 4ZZ | -0.0059 | -0.0012 | -0.0008 | 0.0040  | -0.0013 | -0.0004 | 0.0000  | -0.0005 | 0.0004  | -0.0005 |
|    |   | 4XY | -0.0006 | 0.0042  | 0.0026  | -0.0001 | -0.0012 | -0.0003 | -0.0003 | -0.0001 | 0.0001  | 0.0003  |
|    |   | 4XZ | 0.0008  | 0.0049  | 0.0008  | -0.0033 | 0.0000  | 0.0002  | -0.0005 | 0.0002  | -0.0002 | 0.0003  |
|    |   | 4YZ | 0.0073  | -0.0034 | 0.0014  | 0.0005  | 0.0009  | 0.0008  | 0.0000  | 0.0002  | -0.0001 | -0.0005 |
| 5  | H | 1S  | 0.0142  | -0.0569 | -0.0267 | 0.0517  | -0.0147 | -0.0014 | 0.0023  | -0.0054 | 0.0031  | 0.0023  |
|    |   | 2S  | 0.0156  | -0.0443 | -0.0244 | 0.0472  | -0.0079 | -0.0002 | 0.0013  | -0.0078 | 0.0047  | 0.0096  |
|    |   | 3PX | 0.0014  | -0.0010 | -0.0007 | -0.0001 | 0.0008  | 0.0001  | -0.0002 | 0.0000  | 0.0001  | 0.0001  |
|    |   | 3PY | -0.0042 | 0.0036  | -0.0001 | -0.0002 | -0.0007 | -0.0007 | 0.0000  | -0.0002 | 0.0002  | 0.0005  |
|    |   | 3PZ | 0.0003  | 0.0010  | 0.0008  | -0.0011 | 0.0002  | -0.0001 | 0.0000  | 0.0001  | 0.0000  | 0.0001  |
| 6  | H | 1S  | 0.1012  | -0.0623 | -0.0093 | -0.0295 | 0.0443  | 0.0136  | -0.0043 | 0.0096  | -0.0059 | -0.0083 |
|    |   | 2S  | 0.0969  | -0.0425 | -0.0217 | -0.0076 | 0.0326  | -0.0250 | 0.0086  | -0.0314 | 0.0253  | -0.0245 |
|    |   | 3PX | -0.0031 | 0.0013  | -0.0002 | 0.0008  | -0.0007 | -0.0002 | -0.0002 | 0.0001  | 0.0000  | 0.0001  |
|    |   | 3PY | -0.0020 | 0.0000  | -0.0006 | -0.0007 | 0.0013  | 0.0013  | -0.0006 | 0.0009  | -0.0005 | -0.0003 |
|    |   | 3PZ | 0.0032  | -0.0031 | -0.0006 | 0.0007  | 0.0004  | 0.0003  | -0.0001 | 0.0002  | -0.0001 | 0.0000  |
| 7  | H | 1S  | -0.1170 | 0.0995  | -0.0047 | -0.0124 | -0.0032 | -0.0039 | -0.0048 | -0.0019 | 0.0018  | 0.0051  |
|    |   | 2S  | -0.1062 | 0.0864  | -0.0132 | -0.0065 | 0.0106  | -0.0039 | -0.0043 | -0.0024 | 0.0008  | 0.0066  |
|    |   | 3PX | 0.0033  | -0.0024 | -0.0007 | -0.0005 | 0.0002  | 0.0002  | -0.0001 | 0.0001  | -0.0001 | 0.0001  |
|    |   | 3PY | 0.0010  | -0.0016 | -0.0008 | 0.0006  | 0.0007  | 0.0001  | 0.0004  | -0.0001 | 0.0000  | 0.0001  |
|    |   | 3PZ | -0.0038 | 0.0028  | -0.0004 | 0.0001  | 0.0004  | -0.0001 | 0.0000  | 0.0000  | 0.0000  | 0.0001  |
| 8  | H | 1S  | -0.0286 | -0.0089 | -0.0141 | 0.0291  | 0.0214  | 0.0000  | 0.0095  | -0.0007 | 0.0013  | -0.0011 |
|    |   | 2S  | -0.0273 | -0.0090 | -0.0185 | 0.0318  | 0.0214  | -0.0001 | 0.0137  | -0.0016 | 0.0034  | 0.0004  |
|    |   | 3PX | 0.0040  | -0.0025 | -0.0007 | -0.0003 | 0.0008  | 0.0002  | 0.0003  | 0.0001  | 0.0000  | -0.0001 |
|    |   | 3PY | -0.0005 | 0.0014  | -0.0004 | -0.0007 | 0.0005  | 0.0002  | 0.0003  | 0.0000  | -0.0001 | 0.0000  |
|    |   | 3PZ | 0.0037  | -0.0020 | 0.0005  | -0.0006 | -0.0007 | 0.0000  | -0.0001 | 0.0000  | -0.0001 | 0.0000  |
| 9  | H | 1S  | -0.0184 | -0.0693 | -0.0135 | 0.0517  | -0.0015 | -0.0030 | 0.0024  | -0.0030 | 0.0023  | -0.0014 |
|    |   | 2S  | -0.0156 | -0.0604 | -0.0125 | 0.0501  | -0.0022 | -0.0039 | 0.0039  | -0.0043 | 0.0032  | -0.0032 |
|    |   | 3PX | -0.0032 | 0.0037  | 0.0005  | -0.0003 | 0.0003  | 0.0000  | -0.0002 | 0.0001  | 0.0000  | 0.0000  |
|    |   | 3PY | 0.0032  | -0.0014 | 0.0001  | 0.0003  | 0.0004  | 0.0001  | 0.0001  | 0.0001  | -0.0001 | 0.0002  |
|    |   | 3PZ | -0.0024 | 0.0001  | 0.0000  | 0.0011  | -0.0001 | -0.0002 | 0.0000  | -0.0001 | 0.0001  | 0.0000  |
| 10 | H | 1S  | 0.0138  | 0.0670  | 0.0314  | -0.0185 | 0.0024  | 0.0036  | -0.0027 | 0.0021  | -0.0009 | 0.0004  |



|    |   |     |         |         |         |         |         |         |         |         |         |         |
|----|---|-----|---------|---------|---------|---------|---------|---------|---------|---------|---------|---------|
|    |   | 2S  | 0.0101  | 0.0592  | 0.0249  | -0.0114 | 0.0063  | 0.0053  | -0.0013 | 0.0024  | -0.0010 | 0.0028  |
|    |   | 3PX | -0.0042 | 0.0010  | -0.0002 | 0.0011  | -0.0003 | -0.0003 | -0.0002 | -0.0001 | 0.0001  | 0.0001  |
|    |   | 3PY | 0.0033  | -0.0038 | -0.0008 | 0.0003  | 0.0004  | 0.0002  | 0.0002  | 0.0000  | -0.0001 | 0.0001  |
|    |   | 3PZ | -0.0022 | 0.0017  | -0.0002 | -0.0007 | -0.0004 | -0.0001 | -0.0001 | -0.0001 | 0.0001  | -0.0001 |
| 11 | N | 1S  | 0.0156  | -0.0004 | 0.0127  | -0.0064 | -0.0066 | 0.0012  | 0.0046  | -0.0011 | 0.0010  | 0.0058  |
|    |   | 2S  | -0.0355 | 0.0020  | -0.0328 | 0.0149  | 0.0198  | -0.0012 | -0.0100 | 0.0013  | -0.0016 | -0.0118 |
|    |   | 2PX | 0.0381  | 0.0443  | 0.0929  | -0.0178 | -0.0886 | 0.0087  | 0.0075  | -0.0020 | -0.0016 | 0.0090  |
|    |   | 2PY | 0.0059  | 0.0391  | -0.0142 | 0.0093  | 0.0876  | 0.0070  | 0.0264  | -0.0031 | 0.0037  | 0.0159  |
|    |   | 2PZ | 0.0015  | -0.0347 | 0.0485  | -0.0656 | 0.0084  | -0.0087 | -0.0074 | 0.0076  | -0.0016 | -0.0436 |
|    |   | 3S  | -0.1037 | -0.0092 | -0.0595 | 0.0440  | 0.0213  | -0.0183 | -0.0285 | 0.0194  | -0.0122 | -0.0574 |
|    |   | 3PX | 0.0210  | 0.0293  | 0.0277  | -0.0043 | -0.0367 | 0.0141  | -0.0018 | -0.0033 | 0.0001  | 0.0041  |
|    |   | 3PY | -0.0081 | 0.0341  | -0.0282 | 0.0045  | 0.0903  | 0.0224  | 0.0210  | -0.0042 | 0.0008  | 0.0152  |
|    |   | 3PZ | -0.0008 | -0.0269 | 0.0279  | -0.0481 | 0.0136  | -0.0010 | -0.0123 | 0.0108  | -0.0047 | -0.0486 |
|    |   | 4XX | 0.0051  | -0.0008 | 0.0036  | -0.0044 | -0.0006 | 0.0014  | 0.0018  | 0.0003  | -0.0010 | 0.0004  |
|    |   | 4YY | -0.0038 | 0.0017  | -0.0006 | 0.0013  | -0.0013 | -0.0005 | -0.0010 | -0.0004 | 0.0008  | 0.0009  |
|    |   | 4ZZ | 0.0028  | 0.0005  | -0.0001 | 0.0007  | 0.0017  | 0.0008  | 0.0012  | -0.0003 | 0.0004  | 0.0011  |
|    |   | 4XY | -0.0076 | 0.0052  | 0.0007  | 0.0002  | 0.0005  | 0.0004  | 0.0012  | 0.0002  | -0.0008 | -0.0007 |
|    |   | 4XZ | 0.0044  | -0.0020 | 0.0011  | 0.0018  | -0.0023 | 0.0004  | 0.0003  | 0.0000  | 0.0001  | 0.0000  |
|    |   | 4YZ | -0.0026 | -0.0028 | -0.0013 | 0.0029  | -0.0031 | -0.0004 | -0.0005 | -0.0007 | -0.0003 | -0.0021 |
| 12 | N | 1S  | 0.0120  | 0.0142  | 0.0479  | -0.0335 | -0.0555 | 0.0038  | 0.0137  | -0.0010 | -0.0033 | -0.0008 |
|    |   | 2S  | -0.0266 | -0.0297 | -0.0968 | 0.0715  | 0.1128  | -0.0081 | -0.0300 | 0.0018  | 0.0075  | 0.0002  |
|    |   | 2PX | 0.1049  | 0.0402  | 0.2308  | -0.1579 | -0.2364 | 0.0056  | 0.0274  | 0.0011  | -0.0028 | -0.0199 |
|    |   | 2PY | -0.0062 | -0.0149 | -0.0870 | 0.0006  | 0.0472  | 0.0188  | 0.0570  | -0.0082 | -0.0164 | 0.0226  |
|    |   | 2PZ | -0.0111 | -0.0106 | 0.0676  | -0.0269 | -0.1948 | 0.0009  | -0.0274 | -0.0058 | 0.0008  | 0.0222  |
|    |   | 3S  | -0.0226 | -0.0678 | -0.1993 | 0.1386  | 0.2424  | -0.0272 | -0.1016 | 0.0099  | 0.0218  | 0.0092  |
|    |   | 3PX | 0.0697  | 0.0223  | 0.1541  | -0.0968 | -0.1512 | 0.0007  | -0.0093 | 0.0063  | 0.0043  | -0.0241 |
|    |   | 3PY | -0.0089 | -0.0027 | -0.0382 | 0.0063  | 0.0228  | 0.0150  | 0.0285  | -0.0027 | -0.0089 | 0.0111  |
|    |   | 3PZ | -0.0030 | -0.0089 | 0.0394  | -0.0177 | -0.1251 | 0.0014  | -0.0265 | -0.0051 | 0.0002  | 0.0182  |
|    |   | 4XX | 0.0073  | 0.0039  | 0.0156  | -0.0103 | -0.0136 | 0.0012  | 0.0042  | 0.0000  | -0.0006 | -0.0016 |
|    |   | 4YY | -0.0020 | 0.0009  | 0.0047  | -0.0018 | -0.0045 | -0.0005 | -0.0004 | -0.0001 | -0.0002 | 0.0009  |
|    |   | 4ZZ | -0.0021 | 0.0004  | -0.0009 | 0.0010  | -0.0031 | 0.0005  | 0.0005  | -0.0003 | -0.0001 | -0.0003 |
|    |   | 4XY | -0.0030 | -0.0012 | -0.0064 | 0.0001  | 0.0014  | 0.0009  | 0.0039  | -0.0005 | -0.0010 | -0.0002 |
|    |   | 4XZ | 0.0009  | -0.0008 | 0.0072  | -0.0039 | -0.0124 | 0.0004  | -0.0012 | -0.0002 | -0.0002 | 0.0012  |
|    |   | 4YZ | 0.0000  | -0.0030 | -0.0045 | 0.0005  | 0.0048  | 0.0001  | -0.0003 | 0.0000  | -0.0001 | 0.0021  |
| 13 | N | 1S  | -0.0084 | -0.0118 | -0.0041 | 0.0198  | 0.0148  | -0.0002 | -0.0015 | 0.0005  | -0.0002 | -0.0065 |
|    |   | 2S  | 0.0180  | 0.0257  | 0.0125  | -0.0446 | -0.0344 | 0.0035  | 0.0033  | 0.0000  | -0.0010 | 0.0078  |
|    |   | 2PX | 0.0256  | 0.0094  | 0.0197  | 0.0514  | 0.0945  | 0.0000  | -0.0015 | -0.0018 | -0.0023 | 0.0384  |
|    |   | 2PY | -0.0126 | 0.0271  | 0.1150  | 0.0257  | -0.0692 | -0.0031 | -0.0021 | 0.0017  | 0.0011  | -0.0235 |
|    |   | 2PZ | -0.0092 | 0.0466  | -0.0357 | 0.0313  | 0.0281  | 0.0086  | 0.0434  | -0.0010 | -0.0028 | -0.0391 |
|    |   | 3S  | 0.0521  | 0.0781  | 0.0098  | -0.1270 | -0.0921 | -0.0143 | 0.0130  | -0.0143 | 0.0161  | 0.0922  |
|    |   | 3PX | 0.0273  | 0.0037  | 0.0529  | 0.0327  | 0.0273  | -0.0410 | -0.0041 | -0.0055 | 0.0055  | 0.0900  |
|    |   | 3PY | -0.0218 | 0.0133  | 0.0850  | 0.0327  | -0.0437 | -0.0039 | 0.0280  | 0.0047  | -0.0068 | -0.0192 |
|    |   | 3PZ | -0.0028 | 0.0278  | -0.0157 | 0.0150  | 0.0032  | -0.0084 | 0.0212  | -0.0017 | 0.0009  | -0.0184 |
|    |   | 4XX | -0.0031 | -0.0023 | -0.0001 | 0.0027  | 0.0027  | 0.0037  | 0.0131  | -0.0017 | -0.0037 | -0.0013 |

|    |     |         |         |         |         |         |         |         |         |         |         |         |
|----|-----|---------|---------|---------|---------|---------|---------|---------|---------|---------|---------|---------|
|    | 4YY | -0.0003 | -0.0025 | 0.0019  | 0.0022  | -0.0062 | -0.0025 | -0.0150 | 0.0011  | 0.0028  | -0.0038 |         |
|    | 4ZZ | 0.0000  | 0.0006  | -0.0009 | 0.0006  | 0.0066  | 0.0007  | 0.0016  | 0.0010  | 0.0001  | -0.0015 |         |
|    | 4XY | 0.0048  | 0.0030  | 0.0105  | -0.0083 | -0.0087 | 0.0006  | 0.0006  | 0.0006  | -0.0002 | -0.0003 |         |
|    | 4XZ | -0.0015 | 0.0011  | -0.0018 | -0.0011 | 0.0054  | 0.0010  | 0.0073  | -0.0001 | -0.0009 | 0.0011  |         |
|    | 4YZ | -0.0005 | 0.0003  | 0.0009  | -0.0038 | -0.0050 | 0.0021  | 0.0057  | -0.0011 | -0.0020 | 0.0010  |         |
| 14 | C   | 1S      | 0.0091  | 0.0015  | 0.0011  | -0.0083 | -0.0083 | -0.0071 | -0.0185 | 0.0019  | -0.0008 | 0.0022  |
|    |     | 2S      | -0.0235 | -0.0056 | -0.0039 | 0.0239  | 0.0227  | 0.0124  | 0.0480  | -0.0037 | 0.0010  | 0.0030  |
|    |     | 2PX     | -0.0141 | -0.0196 | 0.0242  | -0.0228 | -0.1047 | -0.0098 | -0.0449 | 0.0020  | 0.0163  | -0.0052 |
|    |     | 2PY     | -0.0128 | 0.0147  | -0.0151 | -0.0208 | 0.0337  | -0.0105 | -0.0289 | 0.0056  | -0.0104 | 0.0122  |
|    |     | 2PZ     | 0.0317  | 0.0566  | 0.0404  | -0.0589 | 0.0357  | 0.0055  | 0.0216  | 0.0041  | 0.0075  | 0.0314  |
|    |     | 3S      | -0.0412 | 0.0070  | -0.0346 | 0.0312  | 0.0663  | 0.0865  | 0.0903  | -0.0104 | 0.0075  | -0.0763 |
|    |     | 3PX     | 0.0216  | 0.0170  | 0.0364  | -0.0089 | -0.0434 | -0.0324 | -0.0003 | -0.0174 | 0.0259  | 0.0883  |
|    |     | 3PY     | 0.0228  | 0.0325  | -0.0180 | -0.0280 | 0.0485  | 0.0170  | -0.0189 | -0.0060 | -0.0078 | 0.0296  |
|    |     | 3PZ     | 0.0182  | 0.0322  | 0.0333  | -0.0267 | 0.0117  | -0.0130 | 0.0263  | -0.0045 | 0.0113  | 0.0494  |
|    |     | 4XX     | 0.0054  | 0.0063  | 0.0001  | -0.0006 | 0.0022  | -0.0008 | 0.0003  | 0.0003  | 0.0002  | 0.0047  |
|    |     | 4YY     | -0.0072 | -0.0099 | -0.0030 | 0.0016  | -0.0036 | -0.0015 | -0.0011 | 0.0007  | -0.0004 | -0.0080 |
|    |     | 4ZZ     | 0.0034  | 0.0028  | 0.0016  | -0.0008 | 0.0012  | 0.0010  | -0.0015 | -0.0002 | 0.0003  | 0.0045  |
|    |     | 4XY     | -0.0022 | -0.0060 | -0.0042 | 0.0006  | -0.0033 | -0.0018 | -0.0028 | 0.0001  | -0.0001 | -0.0012 |
|    |     | 4XZ     | 0.0047  | 0.0028  | 0.0020  | -0.0027 | 0.0053  | 0.0006  | -0.0014 | 0.0001  | 0.0007  | 0.0055  |
|    |     | 4YZ     | -0.0001 | -0.0009 | 0.0000  | -0.0033 | 0.0023  | 0.0006  | 0.0003  | 0.0003  | 0.0000  | -0.0031 |
| 15 | C   | 1S      | -0.0008 | -0.0003 | -0.0184 | -0.0102 | -0.0023 | -0.0001 | 0.0009  | -0.0002 | -0.0001 | -0.0001 |
|    |     | 2S      | 0.0062  | 0.0063  | 0.0476  | 0.0187  | 0.0053  | 0.0072  | -0.0034 | -0.0005 | 0.0022  | -0.0065 |
|    |     | 2PX     | 0.0113  | -0.0154 | -0.0669 | -0.0195 | -0.0185 | -0.0470 | -0.1912 | 0.0155  | 0.0424  | -0.0084 |
|    |     | 2PY     | -0.0034 | -0.0002 | 0.0331  | -0.0675 | -0.0471 | 0.0560  | 0.2251  | -0.0175 | -0.0525 | 0.0028  |
|    |     | 2PZ     | -0.0025 | -0.0021 | -0.0311 | 0.1072  | 0.0425  | -0.0383 | -0.1686 | 0.0131  | 0.0386  | -0.0040 |
|    |     | 3S      | -0.0135 | -0.0130 | 0.0280  | 0.0145  | -0.0253 | -0.0246 | 0.0066  | 0.0079  | -0.0042 | 0.0265  |
|    |     | 3PX     | -0.0043 | -0.0229 | 0.0182  | 0.0571  | 0.0052  | -0.0592 | -0.1252 | 0.0121  | 0.0239  | 0.0216  |
|    |     | 3PY     | 0.0023  | -0.0022 | 0.0700  | 0.0142  | 0.0029  | 0.0204  | 0.1587  | -0.0127 | -0.0335 | 0.0220  |
|    |     | 3PZ     | 0.0071  | 0.0003  | -0.0074 | 0.0585  | 0.0144  | -0.0333 | -0.1002 | 0.0098  | 0.0284  | 0.0019  |
|    |     | 4XX     | 0.0008  | 0.0001  | -0.0054 | -0.0052 | -0.0004 | 0.0003  | -0.0011 | -0.0041 | -0.0049 | 0.0005  |
|    |     | 4YY     | -0.0001 | 0.0008  | -0.0052 | -0.0035 | -0.0027 | 0.0003  | -0.0019 | -0.0046 | -0.0047 | -0.0015 |
|    |     | 4ZZ     | 0.0002  | 0.0005  | 0.0056  | 0.0034  | 0.0019  | 0.0010  | 0.0027  | 0.0085  | 0.0103  | -0.0009 |
|    |     | 4XY     | 0.0002  | 0.0002  | -0.0073 | -0.0073 | -0.0037 | -0.0001 | 0.0017  | 0.0050  | 0.0061  | 0.0008  |
|    |     | 4XZ     | -0.0010 | 0.0000  | -0.0034 | -0.0042 | -0.0017 | 0.0000  | 0.0032  | 0.0039  | 0.0042  | -0.0018 |
|    |     | 4YZ     | 0.0006  | 0.0015  | 0.0021  | -0.0011 | -0.0007 | 0.0004  | -0.0003 | -0.0052 | -0.0062 | -0.0017 |
| 16 | C   | 1S      | -0.0007 | -0.0003 | 0.0069  | 0.0064  | -0.0003 | -0.0001 | 0.0015  | -0.0001 | -0.0004 | -0.0021 |
|    |     | 2S      | 0.0040  | 0.0038  | -0.0143 | -0.0164 | 0.0021  | 0.0045  | -0.0040 | 0.0009  | 0.0041  | -0.0007 |
|    |     | 2PX     | -0.0001 | -0.0114 | 0.0847  | 0.1396  | 0.0681  | -0.0097 | -0.0452 | 0.1022  | 0.1355  | 0.0018  |
|    |     | 2PY     | 0.0171  | -0.0055 | 0.1522  | 0.0112  | 0.0147  | 0.0155  | 0.0438  | -0.1222 | -0.1588 | 0.0053  |
|    |     | 2PZ     | 0.0049  | -0.0174 | -0.0011 | -0.0216 | -0.0027 | -0.0100 | -0.0264 | 0.0870  | 0.1127  | -0.0087 |
|    |     | 3S      | -0.0101 | -0.0102 | -0.0301 | -0.0118 | 0.0003  | -0.0145 | -0.0049 | -0.0028 | -0.0080 | 0.0281  |
|    |     | 3PX     | -0.0019 | -0.0064 | 0.0313  | 0.0566  | 0.0292  | -0.0040 | -0.0396 | 0.0683  | 0.0864  | -0.0029 |
|    |     | 3PY     | 0.0062  | 0.0054  | 0.0407  | -0.0169 | -0.0022 | 0.0263  | 0.0290  | -0.0830 | -0.1067 | -0.0160 |
|    |     | 3PZ     | 0.0020  | 0.0018  | -0.0386 | -0.0178 | -0.0134 | -0.0007 | -0.0202 | 0.0612  | 0.0798  | -0.0118 |

|    |     |         |         |         |         |         |         |         |         |         |         |         |
|----|-----|---------|---------|---------|---------|---------|---------|---------|---------|---------|---------|---------|
|    | 4XX | 0.0004  | 0.0004  | -0.0016 | 0.0007  | -0.0004 | -0.0032 | -0.0149 | -0.0043 | -0.0033 | -0.0010 |         |
|    | 4YY | 0.0011  | -0.0002 | -0.0040 | -0.0003 | 0.0003  | 0.0023  | 0.0071  | 0.0067  | 0.0077  | -0.0013 |         |
|    | 4ZZ | -0.0007 | 0.0008  | 0.0088  | 0.0003  | 0.0011  | 0.0025  | 0.0077  | -0.0025 | -0.0036 | -0.0003 |         |
|    | 4XY | 0.0002  | 0.0001  | -0.0027 | -0.0050 | -0.0028 | 0.0018  | 0.0069  | -0.0003 | -0.0012 | -0.0004 |         |
|    | 4XZ | 0.0003  | -0.0006 | -0.0016 | -0.0084 | -0.0037 | -0.0007 | -0.0012 | -0.0039 | -0.0047 | 0.0004  |         |
|    | 4YZ | 0.0006  | -0.0004 | 0.0011  | -0.0007 | 0.0006  | -0.0022 | -0.0088 | -0.0008 | 0.0003  | 0.0000  |         |
| 17 | C   | 1S      | 0.0012  | -0.0016 | 0.0074  | 0.0032  | 0.0014  | -0.0004 | -0.0014 | -0.0001 | 0.0002  | 0.0015  |
|    |     | 2S      | -0.0015 | 0.0049  | -0.0162 | -0.0098 | -0.0039 | 0.0018  | 0.0025  | -0.0002 | -0.0012 | -0.0013 |
|    |     | 2PX     | 0.0076  | 0.0142  | 0.0978  | 0.1676  | 0.0638  | -0.0143 | -0.1002 | -0.0926 | -0.1023 | -0.0011 |
|    |     | 2PY     | -0.0046 | 0.0037  | 0.1312  | 0.0206  | 0.0001  | 0.0225  | 0.1268  | 0.1114  | 0.1189  | -0.0027 |
|    |     | 2PZ     | 0.0130  | 0.0067  | -0.0416 | -0.0461 | -0.0040 | -0.0143 | -0.0764 | -0.0784 | -0.0819 | -0.0056 |
|    |     | 3S      | -0.0007 | 0.0035  | -0.0224 | 0.0032  | -0.0010 | -0.0094 | 0.0134  | 0.0027  | 0.0028  | -0.0002 |
|    |     | 3PX     | 0.0074  | 0.0081  | 0.0093  | 0.0267  | 0.0162  | 0.0069  | -0.0754 | -0.0647 | -0.0719 | -0.0228 |
|    |     | 3PY     | 0.0039  | 0.0059  | 0.0650  | 0.0044  | 0.0060  | 0.0193  | 0.0923  | 0.0722  | 0.0808  | -0.0047 |
|    |     | 3PZ     | 0.0092  | 0.0007  | 0.0205  | 0.0514  | 0.0258  | -0.0141 | -0.0533 | -0.0537 | -0.0501 | -0.0063 |
|    |     | 4XX     | 0.0007  | 0.0012  | 0.0009  | -0.0027 | -0.0020 | -0.0020 | -0.0032 | 0.0068  | 0.0091  | 0.0005  |
|    |     | 4YY     | 0.0003  | 0.0003  | -0.0010 | -0.0041 | -0.0011 | 0.0037  | 0.0123  | -0.0065 | -0.0099 | 0.0012  |
|    |     | 4ZZ     | 0.0000  | -0.0009 | 0.0036  | 0.0090  | 0.0041  | -0.0018 | -0.0095 | -0.0003 | 0.0007  | 0.0001  |
|    |     | 4XY     | 0.0002  | -0.0002 | -0.0055 | -0.0019 | -0.0010 | -0.0008 | -0.0044 | -0.0015 | -0.0012 | 0.0003  |
|    |     | 4XZ     | 0.0001  | -0.0007 | -0.0037 | -0.0059 | -0.0020 | -0.0021 | -0.0081 | 0.0030  | 0.0049  | -0.0010 |
|    |     | 4YZ     | 0.0004  | 0.0002  | 0.0046  | -0.0036 | -0.0010 | 0.0003  | 0.0029  | 0.0027  | 0.0031  | 0.0002  |
| 18 | C   | 1S      | -0.0014 | 0.0020  | -0.0010 | 0.0045  | 0.0029  | 0.0001  | -0.0005 | 0.0003  | 0.0005  | 0.0009  |
|    |     | 2S      | 0.0024  | -0.0048 | -0.0016 | -0.0141 | -0.0079 | -0.0005 | 0.0019  | -0.0010 | -0.0014 | -0.0016 |
|    |     | 2PX     | -0.0102 | 0.0041  | -0.1354 | -0.0605 | -0.0254 | 0.0326  | 0.1326  | 0.0987  | 0.1058  | -0.0077 |
|    |     | 2PY     | -0.0002 | 0.0158  | -0.0833 | -0.0870 | -0.0543 | -0.0396 | -0.1511 | -0.1148 | -0.1243 | 0.0027  |
|    |     | 2PZ     | 0.0030  | 0.0047  | -0.0623 | 0.0775  | 0.0218  | 0.0267  | 0.1050  | 0.0843  | 0.0916  | -0.0028 |
|    |     | 3S      | 0.0094  | 0.0000  | 0.0186  | -0.0067 | -0.0044 | 0.0152  | -0.0008 | 0.0066  | 0.0079  | -0.0209 |
|    |     | 3PX     | -0.0016 | 0.0032  | -0.0340 | 0.0032  | 0.0023  | 0.0315  | 0.0958  | 0.0728  | 0.0794  | -0.0150 |
|    |     | 3PY     | 0.0013  | 0.0060  | -0.0060 | -0.0388 | -0.0237 | -0.0260 | -0.1201 | -0.0899 | -0.0985 | -0.0021 |
|    |     | 3PZ     | -0.0021 | -0.0027 | -0.0341 | 0.0219  | 0.0109  | 0.0182  | 0.0763  | 0.0577  | 0.0627  | -0.0035 |
|    |     | 4XX     | -0.0004 | 0.0004  | -0.0056 | 0.0031  | 0.0012  | -0.0004 | -0.0020 | 0.0052  | 0.0068  | -0.0001 |
|    |     | 4YY     | -0.0001 | 0.0004  | -0.0029 | -0.0053 | -0.0016 | 0.0025  | 0.0091  | -0.0056 | -0.0084 | 0.0003  |
|    |     | 4ZZ     | 0.0003  | -0.0004 | 0.0091  | 0.0053  | 0.0018  | -0.0020 | -0.0071 | 0.0007  | 0.0019  | 0.0000  |
|    |     | 4XY     | -0.0004 | 0.0006  | -0.0054 | -0.0062 | -0.0026 | -0.0009 | -0.0031 | -0.0006 | -0.0003 | 0.0000  |
|    |     | 4XZ     | -0.0006 | -0.0003 | -0.0048 | -0.0084 | -0.0030 | -0.0019 | -0.0057 | 0.0029  | 0.0045  | -0.0004 |
|    |     | 4YZ     | 0.0000  | -0.0006 | 0.0014  | 0.0005  | 0.0008  | 0.0007  | 0.0022  | 0.0020  | 0.0022  | -0.0003 |
| 19 | C   | 1S      | -0.0023 | -0.0020 | -0.0018 | -0.0028 | 0.0004  | 0.0005  | 0.0005  | -0.0002 | -0.0007 | -0.0006 |
|    |     | 2S      | 0.0048  | 0.0040  | 0.0006  | 0.0071  | -0.0012 | -0.0016 | -0.0008 | 0.0008  | 0.0020  | 0.0022  |
|    |     | 2PX     | -0.0025 | -0.0056 | -0.1586 | -0.1128 | -0.0265 | 0.0266  | 0.0626  | -0.1129 | -0.1480 | 0.0061  |
|    |     | 2PY     | -0.0048 | -0.0125 | -0.0559 | -0.1001 | -0.0490 | -0.0362 | -0.0799 | 0.1304  | 0.1745  | -0.0040 |
|    |     | 2PZ     | 0.0089  | -0.0036 | 0.0061  | 0.1252  | 0.0406  | 0.0258  | 0.0533  | -0.0902 | -0.1215 | 0.0043  |
|    |     | 3S      | 0.0127  | 0.0122  | 0.0188  | -0.0044 | 0.0011  | 0.0139  | -0.0055 | -0.0100 | -0.0096 | -0.0138 |
|    |     | 3PX     | 0.0035  | -0.0005 | -0.0445 | -0.0184 | 0.0040  | 0.0244  | 0.0485  | -0.0815 | -0.1073 | 0.0034  |
|    |     | 3PY     | 0.0002  | -0.0051 | 0.0077  | -0.0461 | -0.0230 | -0.0197 | -0.0619 | 0.0977  | 0.1304  | -0.0117 |

|    |   |     |         |         |         |         |         |         |         |         |         |         |
|----|---|-----|---------|---------|---------|---------|---------|---------|---------|---------|---------|---------|
|    |   | 3PZ | 0.0040  | 0.0008  | 0.0000  | 0.0377  | 0.0158  | 0.0213  | 0.0428  | -0.0717 | -0.0984 | 0.0030  |
|    |   | 4XX | -0.0001 | 0.0000  | -0.0049 | -0.0002 | -0.0002 | -0.0028 | -0.0117 | -0.0043 | -0.0036 | -0.0001 |
|    |   | 4YY | -0.0006 | -0.0002 | -0.0011 | -0.0070 | -0.0026 | 0.0008  | 0.0054  | 0.0048  | 0.0052  | -0.0002 |
|    |   | 4ZZ | 0.0002  | -0.0002 | 0.0062  | 0.0060  | 0.0029  | 0.0021  | 0.0065  | -0.0008 | -0.0020 | 0.0000  |
|    |   | 4XY | -0.0004 | -0.0001 | -0.0070 | -0.0040 | -0.0012 | 0.0016  | 0.0053  | 0.0003  | -0.0004 | -0.0002 |
|    |   | 4XZ | 0.0001  | 0.0003  | -0.0050 | -0.0045 | -0.0009 | 0.0000  | -0.0007 | -0.0023 | -0.0027 | 0.0000  |
|    |   | 4YZ | 0.0004  | 0.0004  | 0.0038  | -0.0024 | -0.0003 | -0.0019 | -0.0068 | -0.0014 | -0.0006 | -0.0002 |
| 20 | C | 1S  | 0.0015  | 0.0008  | -0.0011 | -0.0012 | -0.0009 | -0.0001 | 0.0007  | -0.0001 | 0.0001  | 0.0001  |
|    |   | 2S  | -0.0031 | -0.0014 | 0.0019  | 0.0025  | 0.0021  | 0.0011  | 0.0002  | 0.0001  | -0.0006 | -0.0007 |
|    |   | 2PX | 0.0126  | -0.0062 | 0.1367  | 0.1809  | 0.0664  | 0.0510  | 0.1674  | -0.0105 | -0.0378 | 0.0018  |
|    |   | 2PY | 0.0078  | -0.0116 | 0.1675  | 0.0354  | 0.0102  | -0.0546 | -0.1895 | 0.0124  | 0.0414  | -0.0028 |
|    |   | 2PZ | -0.0034 | -0.0093 | -0.0117 | -0.0655 | -0.0019 | 0.0394  | 0.1389  | -0.0100 | -0.0305 | 0.0008  |
|    |   | 3S  | -0.0057 | -0.0081 | 0.0227  | 0.0220  | 0.0107  | -0.0051 | -0.0116 | 0.0001  | 0.0010  | 0.0016  |
|    |   | 3PX | 0.0007  | -0.0034 | -0.0011 | 0.0462  | 0.0167  | 0.0278  | 0.1138  | -0.0018 | -0.0187 | 0.0072  |
|    |   | 3PY | -0.0012 | -0.0037 | 0.0264  | -0.0236 | -0.0120 | -0.0413 | -0.1291 | 0.0037  | 0.0232  | 0.0027  |
|    |   | 3PZ | -0.0021 | -0.0030 | -0.0140 | -0.0252 | 0.0001  | 0.0259  | 0.0882  | -0.0182 | -0.0350 | -0.0007 |
|    |   | 4XX | 0.0002  | 0.0006  | -0.0080 | 0.0021  | 0.0007  | 0.0022  | 0.0061  | -0.0044 | -0.0063 | 0.0003  |
|    |   | 4YY | -0.0003 | -0.0001 | -0.0014 | -0.0089 | -0.0036 | -0.0026 | -0.0089 | -0.0043 | -0.0041 | 0.0002  |
|    |   | 4ZZ | 0.0003  | -0.0004 | 0.0073  | 0.0053  | 0.0021  | 0.0004  | 0.0034  | 0.0086  | 0.0103  | -0.0003 |
|    |   | 4XY | -0.0006 | -0.0001 | -0.0079 | -0.0067 | -0.0028 | -0.0004 | 0.0007  | 0.0051  | 0.0063  | -0.0002 |
|    |   | 4XZ | -0.0006 | -0.0009 | -0.0053 | -0.0054 | -0.0012 | 0.0011  | 0.0046  | 0.0036  | 0.0039  | -0.0003 |
|    |   | 4YZ | 0.0000  | -0.0007 | 0.0014  | -0.0002 | 0.0009  | 0.0010  | 0.0018  | -0.0057 | -0.0073 | 0.0002  |
| 21 | H | 1S  | 0.0071  | -0.0012 | 0.0436  | 0.0801  | 0.0267  | 0.0002  | -0.0024 | 0.0003  | 0.0007  | 0.0022  |
|    |   | 2S  | 0.0066  | 0.0022  | 0.0578  | 0.1008  | 0.0337  | 0.0020  | -0.0016 | 0.0014  | 0.0020  | 0.0029  |
|    |   | 3PX | 0.0000  | -0.0001 | -0.0011 | 0.0013  | 0.0003  | 0.0006  | 0.0030  | 0.0025  | 0.0027  | 0.0000  |
|    |   | 3PY | -0.0001 | 0.0002  | -0.0012 | -0.0013 | -0.0009 | -0.0010 | -0.0037 | -0.0028 | -0.0031 | 0.0001  |
|    |   | 3PZ | -0.0004 | 0.0002  | -0.0024 | -0.0009 | -0.0003 | 0.0006  | 0.0027  | 0.0021  | 0.0023  | -0.0001 |
| 22 | H | 1S  | 0.0003  | 0.0077  | 0.0382  | -0.0171 | 0.0007  | -0.0002 | 0.0028  | -0.0002 | 0.0004  | -0.0011 |
|    |   | 2S  | 0.0004  | 0.0043  | 0.0502  | -0.0198 | 0.0016  | 0.0020  | 0.0055  | -0.0017 | -0.0029 | -0.0030 |
|    |   | 3PX | -0.0001 | -0.0001 | -0.0026 | -0.0018 | -0.0004 | 0.0006  | 0.0014  | -0.0028 | -0.0037 | 0.0002  |
|    |   | 3PY | -0.0001 | 0.0001  | 0.0001  | -0.0023 | -0.0009 | -0.0009 | -0.0019 | 0.0033  | 0.0043  | -0.0001 |
|    |   | 3PZ | 0.0002  | 0.0005  | 0.0012  | 0.0014  | 0.0007  | 0.0006  | 0.0013  | -0.0022 | -0.0029 | 0.0001  |
| 23 | C | 1S  | -0.0007 | 0.0017  | -0.0061 | 0.0031  | 0.0008  | -0.0001 | -0.0014 | 0.0004  | -0.0001 | -0.0007 |
|    |   | 2S  | 0.0015  | -0.0020 | 0.0118  | -0.0068 | 0.0011  | 0.0020  | 0.0020  | -0.0011 | 0.0000  | -0.0010 |
|    |   | 2PX | 0.0082  | -0.0135 | -0.0573 | -0.0843 | -0.0385 | 0.0063  | 0.0224  | -0.0353 | -0.0420 | 0.0028  |
|    |   | 2PY | 0.0241  | 0.0037  | -0.1012 | 0.0115  | -0.0094 | -0.0099 | -0.0208 | 0.0408  | 0.0498  | 0.0003  |
|    |   | 2PZ | -0.0364 | 0.0161  | -0.0202 | 0.0135  | -0.0052 | 0.0041  | 0.0132  | -0.0292 | -0.0368 | 0.0022  |
|    |   | 3S  | 0.0049  | -0.0163 | 0.0566  | -0.0063 | -0.0119 | -0.0104 | 0.0166  | -0.0013 | 0.0017  | 0.0161  |
|    |   | 3PX | 0.0002  | -0.0104 | -0.0356 | -0.0394 | -0.0236 | 0.0016  | 0.0225  | -0.0121 | -0.0132 | 0.0074  |
|    |   | 3PY | 0.0156  | 0.0068  | -0.0490 | -0.0048 | -0.0112 | -0.0015 | -0.0195 | 0.0115  | 0.0165  | -0.0082 |
|    |   | 3PZ | -0.0199 | 0.0045  | -0.0186 | 0.0009  | -0.0106 | 0.0039  | 0.0169  | -0.0097 | -0.0126 | 0.0035  |
|    |   | 4XX | -0.0017 | 0.0008  | -0.0001 | -0.0012 | -0.0008 | 0.0004  | 0.0005  | -0.0040 | -0.0050 | -0.0003 |
|    |   | 4YY | 0.0017  | -0.0002 | -0.0061 | 0.0002  | 0.0003  | -0.0006 | -0.0027 | 0.0081  | 0.0105  | -0.0007 |
|    |   | 4ZZ | -0.0001 | 0.0003  | 0.0050  | 0.0013  | 0.0014  | 0.0009  | 0.0019  | -0.0042 | -0.0054 | -0.0001 |

|    |   |     |         |         |         |         |         |         |         |         |         |         |
|----|---|-----|---------|---------|---------|---------|---------|---------|---------|---------|---------|---------|
|    |   | 4XY | -0.0002 | 0.0005  | -0.0001 | -0.0004 | -0.0002 | 0.0005  | 0.0010  | -0.0011 | -0.0014 | -0.0004 |
|    |   | 4XZ | 0.0009  | -0.0008 | -0.0037 | -0.0072 | -0.0030 | 0.0005  | 0.0018  | -0.0048 | -0.0062 | 0.0004  |
|    |   | 4YZ | 0.0000  | -0.0006 | 0.0030  | -0.0005 | 0.0007  | -0.0002 | -0.0009 | 0.0003  | 0.0006  | 0.0001  |
| 24 | H | 1S  | -0.0077 | -0.0024 | -0.0234 | -0.0541 | -0.0250 | 0.0071  | 0.0207  | -0.0480 | -0.0600 | 0.0014  |
|    |   | 2S  | 0.0010  | 0.0137  | -0.0168 | -0.0554 | -0.0110 | 0.0134  | -0.0009 | -0.0628 | -0.0812 | -0.0158 |
|    |   | 3PX | 0.0006  | 0.0001  | 0.0001  | 0.0008  | 0.0004  | -0.0004 | -0.0010 | 0.0013  | 0.0014  | -0.0002 |
|    |   | 3PY | 0.0004  | 0.0002  | -0.0023 | -0.0007 | -0.0003 | 0.0004  | 0.0007  | -0.0002 | -0.0001 | -0.0003 |
|    |   | 3PZ | -0.0005 | 0.0002  | 0.0002  | 0.0013  | 0.0005  | 0.0003  | 0.0005  | -0.0004 | -0.0004 | 0.0001  |
| 25 | H | 1S  | 0.0212  | -0.0023 | -0.0633 | 0.0051  | -0.0043 | -0.0082 | -0.0187 | 0.0472  | 0.0591  | -0.0001 |
|    |   | 2S  | 0.0087  | -0.0070 | -0.0836 | 0.0195  | 0.0104  | -0.0096 | -0.0144 | 0.0627  | 0.0774  | 0.0078  |
|    |   | 3PX | 0.0000  | -0.0002 | -0.0016 | -0.0015 | -0.0008 | 0.0002  | 0.0005  | -0.0007 | -0.0009 | -0.0001 |
|    |   | 3PY | -0.0005 | 0.0003  | 0.0012  | -0.0002 | -0.0001 | 0.0002  | 0.0000  | -0.0007 | -0.0007 | -0.0002 |
|    |   | 3PZ | -0.0001 | 0.0003  | -0.0010 | 0.0001  | -0.0002 | -0.0003 | -0.0008 | 0.0006  | 0.0009  | 0.0001  |
| 26 | H | 1S  | -0.0216 | 0.0123  | 0.0424  | 0.0525  | 0.0213  | 0.0002  | -0.0026 | 0.0002  | -0.0004 | -0.0007 |
|    |   | 2S  | -0.0189 | 0.0122  | 0.0359  | 0.0571  | 0.0242  | 0.0006  | -0.0052 | 0.0001  | -0.0002 | -0.0021 |
|    |   | 3PX | -0.0007 | 0.0002  | 0.0003  | 0.0000  | 0.0001  | 0.0002  | 0.0004  | -0.0008 | -0.0010 | 0.0000  |
|    |   | 3PY | 0.0002  | 0.0001  | -0.0016 | 0.0006  | 0.0001  | -0.0004 | -0.0007 | 0.0009  | 0.0011  | 0.0002  |
|    |   | 3PZ | 0.0001  | 0.0000  | -0.0013 | -0.0012 | -0.0006 | 0.0002  | 0.0005  | -0.0006 | -0.0008 | 0.0000  |
| 27 | C | 1S  | 0.0006  | -0.0003 | 0.0159  | 0.0121  | 0.0050  | 0.0001  | -0.0002 | 0.0001  | 0.0000  | 0.0000  |
|    |   | 2S  | -0.0014 | 0.0004  | -0.0332 | -0.0250 | -0.0104 | -0.0005 | -0.0003 | 0.0000  | 0.0002  | -0.0001 |
|    |   | 2PX | -0.0126 | -0.0029 | -0.1191 | -0.1551 | -0.0561 | -0.0202 | -0.0597 | 0.0018  | 0.0109  | 0.0001  |
|    |   | 2PY | -0.0092 | 0.0166  | -0.1750 | -0.0538 | -0.0192 | 0.0196  | 0.0653  | -0.0025 | -0.0114 | 0.0002  |
|    |   | 2PZ | 0.0027  | 0.0324  | 0.0193  | 0.0183  | -0.0089 | -0.0148 | -0.0455 | 0.0065  | 0.0140  | -0.0009 |
|    |   | 3S  | -0.0055 | 0.0024  | -0.1057 | -0.0779 | -0.0323 | -0.0032 | 0.0044  | -0.0001 | -0.0002 | 0.0036  |
|    |   | 3PX | -0.0060 | 0.0001  | -0.0650 | -0.0824 | -0.0302 | -0.0093 | -0.0258 | -0.0059 | -0.0033 | 0.0014  |
|    |   | 3PY | -0.0049 | 0.0077  | -0.1009 | -0.0359 | -0.0134 | 0.0074  | 0.0281  | 0.0055  | 0.0036  | 0.0006  |
|    |   | 3PZ | 0.0015  | 0.0144  | 0.0141  | 0.0085  | -0.0037 | -0.0061 | -0.0144 | 0.0159  | 0.0219  | -0.0006 |
|    |   | 4XX | -0.0001 | 0.0012  | -0.0035 | 0.0034  | 0.0011  | 0.0028  | 0.0095  | -0.0008 | -0.0024 | 0.0002  |
|    |   | 4YY | -0.0002 | 0.0002  | 0.0018  | -0.0041 | -0.0020 | -0.0037 | -0.0125 | 0.0004  | 0.0023  | -0.0001 |
|    |   | 4ZZ | 0.0003  | -0.0015 | 0.0046  | 0.0031  | 0.0018  | 0.0008  | 0.0029  | 0.0004  | 0.0002  | 0.0000  |
|    |   | 4XY | -0.0007 | -0.0003 | -0.0074 | -0.0059 | -0.0018 | 0.0001  | 0.0003  | 0.0003  | 0.0004  | 0.0000  |
|    |   | 4XZ | -0.0002 | -0.0012 | -0.0004 | -0.0044 | -0.0009 | 0.0003  | 0.0014  | 0.0001  | 0.0000  | 0.0001  |
|    |   | 4YZ | 0.0000  | -0.0004 | -0.0022 | 0.0009  | 0.0012  | 0.0025  | 0.0082  | -0.0009 | -0.0023 | 0.0002  |
| 28 | H | 1S  | 0.0030  | 0.0005  | 0.0713  | -0.0060 | -0.0087 | -0.0271 | -0.0888 | 0.0057  | 0.0190  | -0.0009 |
|    |   | 2S  | 0.0027  | 0.0002  | 0.0687  | -0.0014 | -0.0066 | -0.0320 | -0.1079 | 0.0080  | 0.0247  | -0.0013 |
|    |   | 3PX | -0.0003 | -0.0001 | -0.0035 | -0.0028 | -0.0009 | 0.0003  | 0.0012  | -0.0001 | -0.0003 | 0.0000  |
|    |   | 3PY | 0.0000  | 0.0003  | -0.0003 | -0.0009 | -0.0005 | -0.0003 | -0.0007 | 0.0001  | 0.0002  | 0.0000  |
|    |   | 3PZ | 0.0000  | 0.0006  | -0.0014 | 0.0006  | 0.0000  | 0.0003  | 0.0010  | 0.0001  | -0.0001 | 0.0000  |
| 29 | H | 1S  | 0.0054  | 0.0157  | 0.0190  | 0.0768  | 0.0224  | 0.0149  | 0.0472  | -0.0024 | -0.0098 | 0.0002  |
|    |   | 2S  | 0.0057  | 0.0144  | 0.0303  | 0.0846  | 0.0264  | 0.0178  | 0.0524  | -0.0152 | -0.0268 | 0.0009  |
|    |   | 3PX | 0.0000  | 0.0006  | -0.0011 | 0.0002  | -0.0002 | -0.0001 | -0.0004 | -0.0002 | -0.0002 | 0.0000  |
|    |   | 3PY | -0.0002 | 0.0000  | -0.0033 | -0.0022 | -0.0007 | 0.0000  | -0.0001 | -0.0004 | -0.0004 | 0.0001  |
|    |   | 3PZ | -0.0001 | 0.0002  | 0.0000  | -0.0010 | -0.0006 | -0.0007 | -0.0022 | 0.0002  | 0.0005  | 0.0000  |
| 30 | H | 1S  | 0.0011  | -0.0227 | 0.0211  | 0.0083  | 0.0136  | 0.0125  | 0.0402  | -0.0031 | -0.0092 | 0.0006  |

|    |     |         |         |         |         |         |         |         |         |         |         |
|----|-----|---------|---------|---------|---------|---------|---------|---------|---------|---------|---------|
|    | 2S  | 0.0016  | -0.0201 | 0.0332  | 0.0130  | 0.0165  | 0.0150  | 0.0515  | 0.0075  | 0.0028  | -0.0001 |
|    | 3PX | -0.0002 | -0.0003 | -0.0016 | -0.0027 | -0.0009 | -0.0005 | -0.0016 | 0.0003  | 0.0006  | 0.0000  |
|    | 3PY | -0.0001 | 0.0000  | -0.0028 | -0.0007 | -0.0002 | 0.0004  | 0.0015  | 0.0002  | 0.0001  | 0.0000  |
|    | 3PZ | 0.0001  | -0.0005 | 0.0013  | 0.0008  | 0.0005  | 0.0002  | 0.0006  | -0.0001 | -0.0002 | 0.0000  |
| 31 | C   | 1S      | -0.0015 | -0.0026 | -0.0062 | -0.0113 | -0.0022 | 0.0024  | -0.0011 | 0.0016  | -0.0011 |
|    |     | 2S      | 0.0011  | 0.0036  | 0.0124  | 0.0229  | 0.0072  | -0.0009 | 0.0008  | -0.0002 | 0.0002  |
|    |     | 2PX     | 0.0211  | 0.0397  | -0.0706 | -0.1570 | -0.0496 | -0.0094 | 0.0396  | 0.0217  | 0.0380  |
|    |     | 2PY     | -0.0156 | -0.0007 | -0.0885 | -0.0159 | -0.0167 | -0.0043 | -0.0426 | -0.0319 | -0.0366 |
|    |     | 2PZ     | 0.0089  | 0.0422  | 0.0486  | 0.0475  | 0.0155  | -0.0021 | 0.0291  | 0.0218  | 0.0288  |
|    |     | 3S      | 0.0150  | 0.0187  | 0.0547  | 0.0880  | 0.0074  | -0.0392 | 0.0137  | -0.0228 | 0.0182  |
|    |     | 3PX     | 0.0156  | 0.0273  | -0.0447 | -0.0916 | -0.0363 | -0.0179 | 0.0260  | -0.0028 | 0.0176  |
|    |     | 3PY     | -0.0090 | -0.0042 | -0.0403 | -0.0130 | -0.0171 | 0.0035  | -0.0321 | 0.0004  | -0.0067 |
|    |     | 3PZ     | 0.0049  | 0.0197  | 0.0276  | 0.0369  | 0.0154  | -0.0069 | 0.0151  | 0.0033  | 0.0137  |
|    |     | 4XX     | 0.0004  | 0.0016  | 0.0003  | -0.0052 | -0.0016 | 0.0008  | 0.0069  | 0.0070  | 0.0078  |
|    |     | 4YY     | -0.0008 | -0.0014 | -0.0051 | -0.0025 | -0.0007 | 0.0005  | -0.0029 | -0.0031 | -0.0045 |
|    |     | 4ZZ     | -0.0002 | -0.0012 | 0.0036  | 0.0055  | 0.0025  | -0.0002 | -0.0045 | -0.0028 | -0.0040 |
|    |     | 4XY     | -0.0004 | -0.0015 | -0.0018 | 0.0019  | 0.0008  | -0.0002 | -0.0049 | -0.0037 | -0.0044 |
|    |     | 4XZ     | 0.0007  | 0.0001  | -0.0016 | -0.0051 | -0.0016 | -0.0005 | 0.0002  | 0.0007  | 0.0012  |
|    |     | 4YZ     | 0.0000  | -0.0015 | 0.0057  | 0.0019  | 0.0010  | 0.0009  | 0.0036  | 0.0034  | 0.0034  |
| 32 | H   | 1S      | -0.0091 | -0.0058 | -0.0725 | -0.0210 | -0.0126 | -0.0056 | -0.0419 | -0.0374 | -0.0413 |
|    |     | 2S      | -0.0105 | -0.0065 | -0.0847 | -0.0170 | 0.0111  | -0.0053 | -0.0428 | -0.0524 | -0.0608 |
|    |     | 3PX     | 0.0005  | 0.0007  | -0.0011 | -0.0029 | -0.0009 | -0.0001 | 0.0001  | 0.0004  | 0.0006  |
|    |     | 3PY     | 0.0003  | 0.0002  | 0.0019  | 0.0006  | 0.0004  | 0.0003  | 0.0009  | 0.0009  | 0.0008  |
|    |     | 3PZ     | 0.0000  | 0.0006  | -0.0005 | 0.0003  | 0.0006  | 0.0000  | 0.0009  | 0.0004  | 0.0005  |
| 33 | H   | 1S      | 0.0154  | 0.0314  | -0.0089 | -0.0778 | -0.0239 | -0.0007 | 0.0517  | 0.0404  | 0.0516  |
|    |     | 2S      | -0.0026 | 0.0059  | -0.0029 | -0.0820 | -0.0174 | 0.0416  | 0.0406  | 0.0814  | 0.0501  |
|    |     | 3PX     | -0.0006 | -0.0008 | -0.0008 | 0.0005  | 0.0000  | 0.0001  | -0.0005 | -0.0005 | -0.0008 |
|    |     | 3PY     | -0.0002 | 0.0003  | -0.0020 | -0.0017 | -0.0006 | 0.0001  | -0.0003 | 0.0000  | -0.0002 |
|    |     | 3PZ     | -0.0004 | -0.0003 | 0.0009  | 0.0024  | 0.0004  | 0.0001  | -0.0013 | -0.0005 | -0.0007 |
| 34 | H   | 1S      | -0.0013 | -0.0269 | 0.0345  | 0.0243  | 0.0120  | 0.0034  | -0.0078 | -0.0048 | -0.0089 |
|    |     | 2S      | -0.0013 | -0.0244 | 0.0295  | 0.0135  | 0.0091  | 0.0045  | -0.0143 | -0.0026 | -0.0073 |
|    |     | 3PX     | 0.0003  | 0.0003  | -0.0008 | -0.0022 | -0.0006 | 0.0001  | 0.0008  | 0.0003  | 0.0004  |
|    |     | 3PY     | -0.0003 | -0.0008 | -0.0009 | 0.0006  | 0.0001  | -0.0002 | -0.0012 | -0.0010 | -0.0010 |
|    |     | 3PZ     | 0.0002  | -0.0003 | 0.0020  | 0.0014  | 0.0005  | 0.0002  | 0.0005  | 0.0005  | 0.0005  |
| 35 | C   | 1S      | 0.0018  | 0.0009  | 0.0033  | 0.0038  | -0.0005 | 0.0003  | 0.0020  | -0.0002 | 0.0015  |
|    |     | 2S      | -0.0068 | -0.0024 | -0.0057 | -0.0075 | -0.0007 | -0.0003 | 0.0033  | -0.0003 | -0.0025 |
|    |     | 2PX     | 0.0901  | 0.1529  | -0.0199 | -0.0494 | 0.1310  | 0.0101  | -0.0263 | 0.0004  | 0.0075  |
|    |     | 2PY     | 0.1083  | 0.1482  | 0.0451  | -0.0392 | 0.0709  | 0.0158  | -0.0084 | -0.0020 | 0.0175  |
|    |     | 2PZ     | 0.0888  | 0.1056  | -0.0055 | -0.0280 | 0.0831  | 0.0107  | -0.0191 | -0.0029 | 0.0117  |
|    |     | 3S      | 0.0054  | 0.0021  | -0.0323 | -0.0183 | 0.0242  | 0.0127  | -0.0387 | 0.0044  | -0.0104 |
|    |     | 3PX     | 0.0335  | 0.0667  | -0.0070 | -0.0233 | 0.0602  | 0.0221  | 0.0183  | 0.0024  | 0.0048  |
|    |     | 3PY     | 0.0652  | 0.0783  | 0.0148  | -0.0357 | 0.0575  | 0.0132  | -0.0312 | 0.0047  | -0.0031 |
|    |     | 3PZ     | 0.0537  | 0.0709  | 0.0112  | -0.0155 | 0.0625  | 0.0112  | -0.0129 | 0.0008  | 0.0189  |
|    |     | 4XX     | 0.0000  | -0.0006 | -0.0015 | 0.0048  | -0.0052 | -0.0166 | 0.0006  | 0.0025  | -0.0042 |

|    |   |     |         |         |         |         |         |         |         |         |         |         |
|----|---|-----|---------|---------|---------|---------|---------|---------|---------|---------|---------|---------|
|    |   | 4YY | -0.0024 | -0.0023 | 0.0030  | -0.0016 | -0.0020 | 0.0029  | 0.0043  | -0.0015 | 0.0022  | 0.0011  |
|    |   | 4ZZ | 0.0025  | 0.0040  | 0.0008  | -0.0024 | 0.0067  | 0.0139  | -0.0023 | -0.0009 | 0.0030  | -0.0178 |
|    |   | 4XY | -0.0016 | -0.0043 | -0.0024 | 0.0033  | -0.0065 | -0.0099 | 0.0025  | 0.0012  | -0.0006 | 0.0122  |
|    |   | 4XZ | 0.0014  | 0.0023  | 0.0002  | 0.0007  | 0.0011  | -0.0002 | 0.0035  | 0.0004  | 0.0007  | 0.0006  |
|    |   | 4YZ | 0.0014  | 0.0027  | 0.0013  | -0.0038 | 0.0064  | 0.0079  | -0.0075 | -0.0008 | -0.0005 | -0.0109 |
| 36 | 0 | 1S  | -0.0014 | -0.0059 | -0.0022 | 0.0004  | -0.0021 | -0.0002 | -0.0024 | -0.0006 | -0.0002 | -0.0002 |
|    |   | 2S  | 0.0038  | 0.0116  | 0.0041  | 0.0005  | 0.0051  | 0.0010  | 0.0038  | 0.0005  | 0.0001  | 0.0005  |
|    |   | 2PX | 0.0716  | 0.0961  | -0.0136 | -0.0444 | 0.1230  | 0.1433  | 0.0123  | -0.0239 | 0.0507  | -0.1360 |
|    |   | 2PY | 0.0952  | 0.1296  | 0.0349  | -0.0623 | 0.1147  | 0.1246  | -0.1306 | -0.0185 | 0.0026  | -0.1742 |
|    |   | 2PZ | 0.0926  | 0.1626  | 0.0211  | -0.0640 | 0.1567  | 0.1431  | -0.0245 | -0.0201 | 0.0380  | -0.1468 |
|    |   | 3S  | -0.0015 | 0.0242  | 0.0092  | -0.0053 | 0.0021  | 0.0007  | 0.0235  | 0.0036  | -0.0033 | -0.0050 |
|    |   | 3PX | 0.0439  | 0.0616  | -0.0069 | -0.0314 | 0.0799  | 0.1073  | 0.0126  | -0.0204 | 0.0310  | -0.1178 |
|    |   | 3PY | 0.0575  | 0.0819  | 0.0231  | -0.0411 | 0.0740  | 0.0930  | -0.0906 | -0.0143 | 0.0005  | -0.1501 |
|    |   | 3PZ | 0.0588  | 0.0999  | 0.0127  | -0.0409 | 0.1038  | 0.1070  | -0.0221 | -0.0153 | 0.0277  | -0.1263 |
|    |   | 4XX | 0.0053  | 0.0070  | -0.0014 | -0.0024 | 0.0081  | 0.0053  | -0.0014 | -0.0008 | 0.0018  | -0.0022 |
|    |   | 4YY | 0.0035  | 0.0044  | 0.0014  | -0.0020 | 0.0042  | 0.0042  | -0.0027 | -0.0015 | 0.0003  | -0.0028 |
|    |   | 4ZZ | -0.0084 | -0.0140 | -0.0013 | 0.0052  | -0.0120 | -0.0089 | 0.0020  | 0.0010  | -0.0032 | 0.0047  |
|    |   | 4XY | 0.0048  | 0.0068  | 0.0010  | -0.0025 | 0.0056  | 0.0047  | -0.0031 | -0.0006 | 0.0011  | -0.0030 |
|    |   | 4XZ | -0.0008 | -0.0008 | 0.0009  | 0.0013  | -0.0018 | -0.0025 | -0.0016 | 0.0011  | -0.0003 | 0.0011  |
|    |   | 4YZ | -0.0038 | -0.0049 | -0.0019 | 0.0018  | -0.0029 | -0.0026 | 0.0034  | 0.0003  | 0.0001  | 0.0019  |
| 37 | C | 1S  | -0.0015 | -0.0001 | -0.0010 | -0.0003 | -0.0021 | 0.0018  | 0.0040  | -0.0005 | 0.0022  | -0.0011 |
|    |   | 2S  | 0.0005  | 0.0007  | 0.0027  | 0.0012  | 0.0040  | -0.0018 | -0.0070 | 0.0006  | -0.0047 | 0.0000  |
|    |   | 2PX | 0.0716  | 0.0635  | -0.0029 | 0.0435  | -0.0435 | -0.1309 | 0.0499  | 0.0177  | -0.0099 | 0.1385  |
|    |   | 2PY | 0.0854  | 0.1222  | -0.0553 | 0.0275  | 0.0262  | -0.1700 | 0.0267  | 0.0275  | -0.0314 | 0.1702  |
|    |   | 2PZ | 0.0691  | 0.0977  | -0.0168 | 0.0250  | -0.0073 | -0.1357 | 0.0216  | 0.0171  | -0.0202 | 0.1272  |
|    |   | 3S  | 0.0178  | 0.0014  | 0.0091  | -0.0009 | 0.0145  | -0.0265 | -0.0409 | -0.0005 | -0.0105 | 0.0368  |
|    |   | 3PX | 0.0333  | 0.0391  | -0.0208 | 0.0263  | -0.0144 | -0.0913 | 0.0349  | 0.0095  | -0.0110 | 0.1149  |
|    |   | 3PY | 0.0520  | 0.0703  | -0.0210 | 0.0252  | 0.0020  | -0.1200 | 0.0208  | 0.0196  | -0.0106 | 0.1699  |
|    |   | 3PZ | 0.0407  | 0.0408  | -0.0125 | 0.0151  | -0.0185 | -0.1011 | 0.0143  | 0.0117  | -0.0228 | 0.1423  |
|    |   | 4XX | -0.0025 | -0.0028 | -0.0042 | 0.0032  | -0.0053 | -0.0036 | 0.0020  | 0.0002  | -0.0009 | -0.0101 |
|    |   | 4YY | 0.0012  | 0.0015  | 0.0024  | -0.0024 | 0.0027  | -0.0001 | 0.0007  | -0.0095 | 0.0079  | 0.0076  |
|    |   | 4ZZ | 0.0002  | 0.0012  | 0.0014  | -0.0009 | 0.0024  | 0.0043  | -0.0017 | 0.0089  | -0.0066 | 0.0023  |
|    |   | 4XY | -0.0002 | -0.0017 | -0.0003 | 0.0025  | -0.0031 | -0.0026 | 0.0017  | -0.0042 | 0.0031  | -0.0034 |
|    |   | 4XZ | -0.0010 | -0.0008 | 0.0009  | 0.0018  | -0.0037 | 0.0002  | -0.0002 | 0.0056  | -0.0046 | -0.0045 |
|    |   | 4YZ | 0.0011  | 0.0017  | -0.0006 | -0.0037 | 0.0056  | 0.0032  | -0.0020 | 0.0031  | -0.0019 | 0.0054  |
| 38 | C | 1S  | 0.0023  | 0.0012  | -0.0002 | 0.0003  | 0.0024  | 0.0007  | 0.0006  | 0.0006  | -0.0003 | 0.0008  |
|    |   | 2S  | -0.0051 | -0.0026 | 0.0002  | -0.0009 | -0.0047 | -0.0016 | -0.0009 | -0.0021 | 0.0007  | -0.0017 |
|    |   | 2PX | 0.0310  | 0.0596  | -0.0837 | 0.0241  | 0.0003  | -0.0595 | 0.0071  | 0.1349  | -0.1122 | -0.0382 |
|    |   | 2PY | 0.0544  | 0.0620  | -0.0051 | 0.0693  | -0.0875 | -0.0747 | 0.0126  | 0.1608  | -0.1323 | -0.0512 |
|    |   | 2PZ | 0.0456  | 0.0545  | -0.0191 | 0.0507  | -0.0444 | -0.0589 | -0.0027 | 0.1307  | -0.1114 | -0.0355 |
|    |   | 3S  | -0.0096 | -0.0069 | 0.0049  | 0.0006  | -0.0146 | -0.0036 | -0.0083 | 0.0024  | 0.0053  | -0.0055 |
|    |   | 3PX | 0.0211  | 0.0258  | -0.0323 | 0.0176  | -0.0151 | -0.0474 | -0.0044 | 0.0973  | -0.0840 | -0.0417 |
|    |   | 3PY | 0.0320  | 0.0494  | -0.0095 | 0.0363  | -0.0331 | -0.0431 | 0.0174  | 0.1164  | -0.0888 | -0.0677 |
|    |   | 3PZ | 0.0243  | 0.0309  | -0.0178 | 0.0264  | -0.0204 | -0.0441 | -0.0053 | 0.0902  | -0.0836 | -0.0475 |

|    |   |     |         |         |         |         |         |         |         |         |         |         |
|----|---|-----|---------|---------|---------|---------|---------|---------|---------|---------|---------|---------|
|    |   | 4XX | -0.0001 | 0.0008  | -0.0029 | 0.0025  | -0.0028 | 0.0049  | -0.0016 | 0.0062  | -0.0050 | -0.0118 |
|    |   | 4YY | 0.0030  | 0.0032  | 0.0000  | -0.0002 | 0.0018  | -0.0087 | 0.0023  | -0.0036 | 0.0028  | 0.0127  |
|    |   | 4ZZ | -0.0024 | -0.0038 | 0.0035  | -0.0020 | 0.0012  | 0.0040  | -0.0008 | -0.0026 | 0.0024  | -0.0010 |
|    |   | 4XY | 0.0013  | 0.0014  | -0.0003 | 0.0026  | -0.0034 | -0.0007 | 0.0002  | 0.0029  | -0.0025 | -0.0020 |
|    |   | 4XZ | -0.0014 | -0.0027 | 0.0003  | -0.0002 | -0.0012 | 0.0049  | -0.0012 | 0.0018  | -0.0013 | -0.0073 |
|    |   | 4YZ | -0.0011 | -0.0002 | -0.0002 | -0.0028 | 0.0044  | -0.0012 | 0.0003  | -0.0036 | 0.0028  | 0.0050  |
| 39 | C | 1S  | 0.0026  | -0.0010 | 0.0016  | 0.0002  | -0.0028 | 0.0001  | -0.0009 | 0.0003  | 0.0002  | -0.0011 |
|    |   | 2S  | -0.0076 | 0.0027  | -0.0042 | 0.0009  | 0.0065  | -0.0002 | 0.0007  | -0.0015 | -0.0011 | 0.0015  |
|    |   | 2PX | 0.0519  | 0.0458  | -0.0513 | 0.0308  | -0.0426 | -0.1150 | 0.0369  | -0.1076 | 0.0789  | -0.0428 |
|    |   | 2PY | 0.0534  | 0.0879  | -0.0252 | 0.0763  | -0.0596 | -0.1474 | 0.0538  | -0.1429 | 0.1015  | -0.0475 |
|    |   | 2PZ | 0.0511  | 0.0261  | -0.0340 | 0.0491  | -0.0480 | -0.0976 | 0.0449  | -0.0997 | 0.0767  | -0.0356 |
|    |   | 3S  | 0.0004  | -0.0071 | -0.0041 | -0.0104 | 0.0081  | -0.0039 | 0.0133  | 0.0011  | -0.0012 | 0.0311  |
|    |   | 3PX | 0.0314  | 0.0280  | -0.0224 | 0.0204  | -0.0190 | -0.0866 | 0.0330  | -0.0760 | 0.0584  | -0.0230 |
|    |   | 3PY | 0.0329  | 0.0437  | -0.0178 | 0.0449  | -0.0307 | -0.1059 | 0.0344  | -0.1006 | 0.0674  | -0.0632 |
|    |   | 3PZ | 0.0284  | 0.0146  | -0.0193 | 0.0277  | -0.0389 | -0.0728 | 0.0304  | -0.0689 | 0.0474  | -0.0386 |
|    |   | 4XX | -0.0004 | -0.0002 | -0.0024 | 0.0023  | -0.0036 | 0.0036  | -0.0002 | -0.0070 | 0.0055  | -0.0134 |
|    |   | 4YY | -0.0019 | -0.0028 | 0.0030  | -0.0030 | 0.0035  | 0.0023  | -0.0011 | 0.0030  | -0.0024 | 0.0042  |
|    |   | 4ZZ | 0.0024  | 0.0032  | 0.0000  | 0.0015  | -0.0004 | -0.0062 | 0.0013  | 0.0034  | -0.0031 | 0.0096  |
|    |   | 4XY | -0.0012 | -0.0024 | 0.0001  | 0.0003  | -0.0014 | 0.0041  | -0.0004 | -0.0034 | 0.0030  | -0.0080 |
|    |   | 4XZ | 0.0016  | 0.0027  | -0.0006 | 0.0023  | -0.0024 | -0.0021 | 0.0012  | -0.0016 | 0.0016  | -0.0014 |
|    |   | 4YZ | 0.0016  | 0.0009  | -0.0009 | -0.0019 | 0.0028  | -0.0038 | -0.0001 | 0.0044  | -0.0036 | 0.0088  |
| 40 | C | 1S  | -0.0003 | -0.0030 | -0.0007 | -0.0002 | -0.0013 | -0.0003 | 0.0000  | 0.0002  | -0.0001 | 0.0000  |
|    |   | 2S  | 0.0001  | 0.0062  | 0.0007  | 0.0000  | 0.0034  | 0.0004  | -0.0006 | -0.0004 | 0.0003  | 0.0001  |
|    |   | 2PX | 0.0412  | 0.0377  | 0.0166  | 0.0788  | -0.1106 | 0.0456  | -0.0181 | 0.1179  | -0.0933 | -0.1065 |
|    |   | 2PY | 0.0247  | 0.0658  | -0.0644 | 0.0621  | -0.0632 | 0.0558  | -0.0252 | 0.1471  | -0.1179 | -0.1313 |
|    |   | 2PZ | 0.0317  | 0.0202  | -0.0632 | 0.0407  | -0.0483 | 0.0422  | -0.0160 | 0.1127  | -0.0896 | -0.1005 |
|    |   | 3S  | 0.0030  | 0.0194  | 0.0110  | 0.0072  | 0.0022  | 0.0066  | 0.0082  | -0.0036 | 0.0013  | -0.0082 |
|    |   | 3PX | 0.0163  | 0.0135  | -0.0068 | 0.0426  | -0.0656 | 0.0310  | -0.0183 | 0.0848  | -0.0689 | -0.0886 |
|    |   | 3PY | 0.0184  | 0.0348  | -0.0285 | 0.0469  | -0.0534 | 0.0428  | -0.0165 | 0.1033  | -0.0847 | -0.1123 |
|    |   | 3PZ | 0.0163  | 0.0180  | -0.0382 | 0.0265  | -0.0294 | 0.0363  | -0.0084 | 0.0817  | -0.0612 | -0.0859 |
|    |   | 4XX | -0.0021 | -0.0024 | -0.0007 | -0.0018 | 0.0012  | 0.0081  | -0.0015 | -0.0081 | 0.0070  | 0.0057  |
|    |   | 4YY | 0.0028  | 0.0027  | -0.0020 | 0.0040  | -0.0049 | -0.0010 | 0.0003  | 0.0047  | -0.0038 | -0.0033 |
|    |   | 4ZZ | -0.0007 | -0.0009 | 0.0032  | -0.0020 | 0.0028  | -0.0072 | 0.0013  | 0.0033  | -0.0031 | -0.0025 |
|    |   | 4XY | 0.0002  | 0.0007  | 0.0003  | 0.0015  | -0.0019 | 0.0053  | -0.0015 | -0.0033 | 0.0029  | 0.0026  |
|    |   | 4XZ | -0.0009 | -0.0023 | 0.0019  | -0.0020 | 0.0018  | 0.0002  | 0.0004  | -0.0026 | 0.0023  | 0.0016  |
|    |   | 4YZ | -0.0004 | 0.0005  | -0.0017 | -0.0013 | 0.0024  | -0.0058 | 0.0010  | 0.0047  | -0.0042 | -0.0033 |
| 41 | H | 1S  | 0.0035  | 0.0000  | 0.0171  | 0.0088  | -0.0121 | -0.0001 | -0.0038 | 0.0017  | -0.0022 | 0.0007  |
|    |   | 2S  | 0.0058  | 0.0039  | 0.0178  | 0.0080  | -0.0081 | 0.0068  | 0.0087  | 0.0025  | 0.0037  | 0.0024  |
|    |   | 3PX | 0.0008  | 0.0013  | -0.0011 | 0.0007  | -0.0004 | -0.0014 | -0.0004 | 0.0034  | -0.0029 | -0.0010 |
|    |   | 3PY | 0.0013  | 0.0015  | 0.0000  | 0.0014  | -0.0016 | -0.0015 | 0.0004  | 0.0039  | -0.0032 | -0.0012 |
|    |   | 3PZ | 0.0008  | 0.0012  | -0.0012 | 0.0006  | -0.0004 | -0.0012 | 0.0001  | 0.0031  | -0.0026 | -0.0009 |
| 42 | C | 1S  | -0.0020 | 0.0022  | 0.0018  | 0.0005  | -0.0001 | 0.0000  | 0.0009  | -0.0002 | 0.0002  | 0.0010  |
|    |   | 2S  | 0.0038  | -0.0045 | -0.0045 | -0.0019 | 0.0010  | -0.0003 | -0.0018 | 0.0009  | -0.0012 | -0.0001 |
|    |   | 2PX | 0.0346  | 0.0398  | -0.0202 | 0.0773  | -0.0799 | 0.0002  | 0.0216  | -0.1226 | 0.0980  | -0.1119 |



|    |   |     |         |         |         |         |         |         |         |         |         |         |
|----|---|-----|---------|---------|---------|---------|---------|---------|---------|---------|---------|---------|
|    |   | 2PY | 0.0340  | 0.0439  | -0.0530 | 0.0651  | -0.0888 | 0.0013  | 0.0169  | -0.1469 | 0.1169  | -0.1414 |
|    |   | 2PZ | 0.0387  | 0.0396  | -0.0439 | 0.0478  | -0.0564 | -0.0039 | 0.0126  | -0.1099 | 0.0860  | -0.1056 |
|    |   | 3S  | 0.0072  | -0.0051 | -0.0025 | 0.0084  | -0.0063 | 0.0045  | -0.0088 | -0.0024 | -0.0013 | -0.0306 |
|    |   | 3PX | 0.0202  | 0.0193  | -0.0226 | 0.0389  | -0.0439 | 0.0045  | 0.0178  | -0.0881 | 0.0738  | -0.0877 |
|    |   | 3PY | 0.0185  | 0.0264  | -0.0347 | 0.0436  | -0.0611 | 0.0060  | 0.0092  | -0.1091 | 0.0847  | -0.1313 |
|    |   | 3PZ | 0.0219  | 0.0243  | -0.0175 | 0.0397  | -0.0430 | 0.0041  | 0.0075  | -0.0822 | 0.0654  | -0.1019 |
|    |   | 4XX | -0.0025 | -0.0026 | 0.0002  | -0.0022 | 0.0014  | 0.0106  | -0.0035 | 0.0059  | -0.0041 | 0.0057  |
|    |   | 4YY | -0.0002 | 0.0004  | 0.0013  | -0.0018 | 0.0034  | -0.0120 | 0.0034  | -0.0039 | 0.0022  | -0.0046 |
|    |   | 4ZZ | 0.0020  | 0.0027  | -0.0009 | 0.0044  | -0.0050 | 0.0016  | 0.0003  | -0.0019 | 0.0017  | -0.0010 |
|    |   | 4XY | -0.0013 | -0.0020 | 0.0021  | -0.0015 | 0.0015  | 0.0023  | -0.0007 | 0.0025  | -0.0017 | 0.0024  |
|    |   | 4XZ | 0.0002  | 0.0013  | -0.0007 | 0.0014  | -0.0016 | 0.0059  | -0.0019 | 0.0017  | -0.0011 | 0.0026  |
|    |   | 4YZ | 0.0015  | 0.0011  | -0.0024 | 0.0009  | -0.0012 | -0.0041 | 0.0015  | -0.0031 | 0.0023  | -0.0030 |
| 43 | H | 1S  | -0.0081 | 0.0196  | 0.0138  | 0.0109  | -0.0009 | -0.0031 | 0.0013  | -0.0030 | -0.0002 | 0.0030  |
|    |   | 2S  | -0.0075 | 0.0161  | 0.0117  | 0.0078  | -0.0140 | -0.0004 | 0.0032  | 0.0007  | -0.0003 | 0.0025  |
|    |   | 3PX | 0.0011  | 0.0015  | -0.0007 | 0.0008  | -0.0005 | -0.0030 | 0.0008  | -0.0030 | 0.0019  | -0.0008 |
|    |   | 3PY | 0.0021  | 0.0009  | -0.0010 | 0.0015  | -0.0016 | -0.0036 | 0.0014  | -0.0039 | 0.0029  | -0.0012 |
|    |   | 3PZ | 0.0009  | 0.0013  | -0.0003 | 0.0015  | -0.0011 | -0.0026 | 0.0010  | -0.0028 | 0.0020  | -0.0007 |
| 44 | C | 1S  | 0.0012  | -0.0018 | -0.0002 | -0.0002 | -0.0009 | 0.0006  | 0.0007  | 0.0000  | 0.0004  | -0.0002 |
|    |   | 2S  | -0.0027 | 0.0036  | 0.0011  | 0.0007  | 0.0016  | -0.0015 | -0.0014 | -0.0001 | -0.0010 | 0.0002  |
|    |   | 2PX | 0.0173  | 0.0147  | -0.0804 | 0.0477  | -0.0747 | 0.1475  | -0.0325 | -0.0143 | 0.0213  | 0.0379  |
|    |   | 2PY | 0.0445  | 0.0546  | -0.0445 | 0.0959  | -0.1151 | 0.1802  | -0.0412 | -0.0205 | 0.0260  | 0.0479  |
|    |   | 2PZ | 0.0260  | 0.0472  | -0.0125 | 0.0778  | -0.1058 | 0.1409  | -0.0352 | -0.0132 | 0.0186  | 0.0360  |
|    |   | 3S  | -0.0021 | 0.0131  | 0.0026  | 0.0011  | 0.0036  | -0.0019 | -0.0020 | 0.0014  | -0.0018 | 0.0020  |
|    |   | 3PX | 0.0172  | 0.0200  | -0.0182 | 0.0437  | -0.0568 | 0.0934  | -0.0211 | -0.0097 | 0.0126  | 0.0207  |
|    |   | 3PY | 0.0185  | 0.0264  | -0.0347 | 0.0461  | -0.0630 | 0.1123  | -0.0286 | -0.0115 | 0.0144  | 0.0379  |
|    |   | 3PZ | 0.0155  | 0.0218  | -0.0221 | 0.0363  | -0.0472 | 0.0903  | -0.0202 | -0.0066 | 0.0139  | 0.0289  |
|    |   | 4XX | -0.0017 | -0.0017 | -0.0004 | -0.0027 | 0.0027  | 0.0066  | -0.0020 | -0.0013 | 0.0016  | 0.0186  |
|    |   | 4YY | 0.0015  | 0.0004  | -0.0012 | 0.0012  | -0.0010 | -0.0062 | 0.0026  | -0.0077 | 0.0057  | -0.0128 |
|    |   | 4ZZ | 0.0006  | 0.0013  | 0.0016  | 0.0014  | -0.0016 | -0.0004 | -0.0006 | 0.0090  | -0.0073 | -0.0058 |
|    |   | 4XY | -0.0005 | -0.0001 | 0.0023  | 0.0003  | -0.0006 | 0.0020  | -0.0002 | -0.0047 | 0.0040  | 0.0074  |
|    |   | 4XZ | -0.0001 | -0.0015 | -0.0001 | -0.0006 | 0.0007  | 0.0032  | -0.0014 | 0.0047  | -0.0036 | 0.0067  |
|    |   | 4YZ | 0.0002  | 0.0010  | -0.0019 | 0.0000  | 0.0002  | -0.0030 | 0.0005  | 0.0036  | -0.0032 | -0.0099 |
| 45 | H | 1S  | 0.0105  | -0.0121 | 0.0142  | 0.0056  | -0.0151 | 0.0001  | 0.0029  | -0.0013 | 0.0018  | 0.0001  |
|    |   | 2S  | 0.0111  | -0.0123 | 0.0170  | 0.0078  | -0.0182 | -0.0009 | 0.0033  | -0.0021 | 0.0017  | 0.0000  |
|    |   | 3PX | 0.0006  | 0.0011  | -0.0001 | 0.0015  | -0.0018 | 0.0013  | -0.0004 | 0.0029  | -0.0023 | -0.0029 |
|    |   | 3PY | 0.0010  | 0.0008  | -0.0008 | 0.0015  | -0.0019 | 0.0015  | -0.0006 | 0.0036  | -0.0029 | -0.0035 |
|    |   | 3PZ | 0.0003  | 0.0009  | -0.0016 | 0.0008  | -0.0007 | 0.0011  | -0.0006 | 0.0028  | -0.0023 | -0.0027 |
| 46 | H | 1S  | -0.0031 | -0.0051 | 0.0096  | 0.0080  | -0.0093 | 0.0037  | 0.0018  | 0.0006  | 0.0009  | 0.0012  |
|    |   | 2S  | -0.0021 | -0.0021 | 0.0161  | 0.0118  | -0.0124 | 0.0044  | 0.0023  | 0.0001  | 0.0019  | -0.0014 |
|    |   | 3PX | 0.0008  | 0.0009  | -0.0006 | 0.0015  | -0.0016 | 0.0000  | 0.0004  | -0.0031 | 0.0024  | -0.0032 |
|    |   | 3PY | 0.0008  | 0.0010  | -0.0012 | 0.0013  | -0.0017 | 0.0001  | 0.0004  | -0.0037 | 0.0030  | -0.0036 |
|    |   | 3PZ | 0.0006  | 0.0005  | -0.0005 | 0.0013  | -0.0016 | 0.0001  | 0.0004  | -0.0027 | 0.0022  | -0.0028 |
| 47 | C | 1S  | 0.0008  | 0.0006  | 0.0043  | 0.0026  | -0.0028 | -0.0001 | 0.0001  | -0.0002 | 0.0001  | -0.0001 |
|    |   | 2S  | -0.0016 | -0.0011 | -0.0089 | -0.0056 | 0.0061  | -0.0001 | -0.0002 | 0.0006  | -0.0004 | 0.0001  |

|    |      |         |         |         |         |         |         |         |         |         |         |
|----|------|---------|---------|---------|---------|---------|---------|---------|---------|---------|---------|
|    | 2PX  | 0.0235  | 0.0338  | 0.0147  | 0.0547  | -0.0659 | 0.1239  | -0.0319 | -0.0151 | 0.0199  | 0.1744  |
|    | 2PY  | 0.0096  | 0.0198  | -0.0259 | 0.0354  | -0.0625 | 0.1568  | -0.0401 | -0.0168 | 0.0245  | 0.2190  |
|    | 2PZ  | 0.0049  | -0.0044 | -0.0569 | 0.0218  | -0.0241 | 0.1182  | -0.0292 | -0.0138 | 0.0193  | 0.1661  |
|    | 3S   | -0.0062 | -0.0079 | -0.0274 | -0.0173 | 0.0169  | -0.0004 | -0.0010 | 0.0014  | -0.0003 | 0.0058  |
|    | 3PX  | 0.0117  | 0.0179  | 0.0052  | 0.0318  | -0.0394 | 0.0965  | -0.0258 | -0.0120 | 0.0158  | 0.1674  |
|    | 3PY  | 0.0053  | 0.0088  | -0.0202 | 0.0223  | -0.0370 | 0.1228  | -0.0317 | -0.0143 | 0.0208  | 0.2108  |
|    | 3PZ  | 0.0030  | 0.0002  | -0.0252 | 0.0154  | -0.0231 | 0.0922  | -0.0235 | -0.0114 | 0.0151  | 0.1615  |
|    | 4XX  | -0.0016 | -0.0021 | 0.0019  | -0.0039 | 0.0051  | -0.0090 | 0.0021  | 0.0009  | -0.0013 | -0.0034 |
|    | 4YY  | 0.0011  | 0.0010  | -0.0020 | 0.0026  | -0.0030 | 0.0058  | -0.0012 | -0.0017 | 0.0017  | 0.0024  |
|    | 4ZZ  | 0.0008  | 0.0014  | 0.0014  | 0.0020  | -0.0029 | 0.0030  | -0.0009 | 0.0008  | -0.0004 | 0.0012  |
|    | 4XY  | -0.0004 | -0.0001 | 0.0024  | -0.0010 | 0.0011  | -0.0037 | 0.0008  | 0.0000  | -0.0002 | -0.0015 |
|    | 4XZ  | -0.0003 | -0.0011 | -0.0005 | -0.0015 | 0.0028  | -0.0031 | 0.0008  | 0.0009  | -0.0009 | -0.0012 |
|    | 4YZ  | 0.0003  | 0.0007  | -0.0018 | 0.0015  | -0.0025 | 0.0049  | -0.0013 | -0.0001 | 0.0004  | 0.0019  |
| 48 | H 1S | 0.0053  | 0.0159  | 0.0301  | 0.0094  | -0.0174 | 0.0003  | -0.0010 | 0.0005  | -0.0005 | -0.0001 |
|    | 2S   | 0.0050  | 0.0150  | 0.0334  | 0.0113  | -0.0213 | 0.0010  | -0.0008 | 0.0002  | -0.0005 | -0.0004 |
|    | 3PX  | 0.0003  | 0.0003  | -0.0006 | 0.0009  | -0.0009 | 0.0029  | -0.0008 | -0.0005 | 0.0006  | 0.0048  |
|    | 3PY  | 0.0002  | 0.0002  | -0.0009 | 0.0007  | -0.0012 | 0.0036  | -0.0009 | -0.0006 | 0.0007  | 0.0060  |
|    | 3PZ  | 0.0004  | 0.0007  | 0.0002  | 0.0009  | -0.0013 | 0.0028  | -0.0007 | -0.0004 | 0.0005  | 0.0045  |
| 49 | H 1S | 0.0030  | -0.0033 | -0.0091 | 0.0027  | 0.0078  | -0.0009 | 0.0008  | -0.0009 | 0.0004  | -0.0001 |
|    | 2S   | 0.0036  | -0.0034 | -0.0079 | 0.0041  | 0.0071  | -0.0004 | 0.0017  | -0.0014 | 0.0013  | -0.0014 |
|    | 3PX  | 0.0004  | 0.0008  | 0.0003  | 0.0010  | -0.0015 | 0.0029  | -0.0008 | -0.0002 | 0.0004  | 0.0048  |
|    | 3PY  | 0.0003  | 0.0003  | -0.0010 | 0.0009  | -0.0011 | 0.0037  | -0.0010 | -0.0002 | 0.0005  | 0.0060  |
|    | 3PZ  | 0.0001  | 0.0001  | -0.0007 | 0.0005  | -0.0009 | 0.0028  | -0.0007 | -0.0002 | 0.0003  | 0.0046  |

### 3.2.2 Combined coefficients and computational details of HFV index (F) of M3

**Table S5.** Combined coefficients  $|c_{ki}|/|c_{kj}|$  after normalization of the  $i$  and  $j$  atoms in the  $k_{th}$  occupied  $\pi$ -type molecular orbital of M3

| $i/j \backslash k$<br>$ c_{ki} / c_{kj} $ | 73     | 74     | 79     | 80     | 83     | 87     | 88     | 89     | 90     | 92     |
|-------------------------------------------|--------|--------|--------|--------|--------|--------|--------|--------|--------|--------|
| 35                                        | 0.2636 | 0.3797 | 0.0779 | 0.1101 | 0.2555 | 0.0615 | 0.0826 | 0.0115 | 0.0432 | 0.2324 |
| 37                                        | 0.2104 | 0.2707 | 0.0830 | 0.0901 | 0.0751 | 0.4254 | 0.1085 | 0.0635 | 0.0672 | 0.4149 |
| 38                                        | 0.1257 | 0.1703 | 0.1167 | 0.1310 | 0.1367 | 0.1861 | 0.0323 | 0.4120 | 0.3400 | 0.1387 |
| 39                                        | 0.1463 | 0.1642 | 0.0931 | 0.1444 | 0.1307 | 0.3556 | 0.1250 | 0.3394 | 0.2420 | 0.1309 |
| 40                                        | 0.0900 | 0.1289 | 0.1291 | 0.1659 | 0.2067 | 0.1444 | 0.0565 | 0.3660 | 0.2883 | 0.2992 |
| 42                                        | 0.0998 | 0.1166 | 0.1050 | 0.1712 | 0.2004 | 0.0280 | 0.0489 | 0.3716 | 0.2921 | 0.3278 |
| 44                                        | 0.0862 | 0.1199 | 0.1277 | 0.1952 | 0.2517 | 0.4372 | 0.0959 | 0.0483 | 0.0623 | 0.1066 |
| 47                                        | 0.0413 | 0.0636 | 0.0963 | 0.1066 | 0.1427 | 0.4004 | 0.0961 | 0.0467 | 0.0640 | 0.5241 |

**Table S6.** The computational details of HFV index (F) of M3

| Active site        | $\pi$ Bond | $\pi$ -Type molecular orbitals with $\delta_k$ in parentheses  | $\pi$ Bond order (P) | $\Sigma^P$ | HFV (F) |
|--------------------|------------|----------------------------------------------------------------|----------------------|------------|---------|
| $\alpha$ (37)      | 37-35      | 73 (1), 74 (1), 80 (-1), 87 (-1), 92 (1)                       | 0.46 <sup>a</sup>    | 1.08       | 0.68    |
|                    | 37-38      | 73 (1), 74 (1), 80 (1), 87 (1), 92 (-1)                        | 0.23 <sup>b</sup>    |            |         |
|                    | 37-39      | 73 (1), 74 (1), 80 (1), 87 (1), 88 (1), 92 (-1)                | 0.39 <sup>c</sup>    |            |         |
| $\gamma$ (42)      | 42-39      | 73 (1), 74 (1), 79 (1), 80 (1), 83 (1), 89 (1), 90 (1), 92 (1) | 0.65 <sup>d</sup>    | 0.82       | 0.94    |
|                    | 42-44      | 73 (1), 74 (1), 79 (1), 80 (1), 83 (1), 92 (-1)                | 0.17 <sup>e</sup>    |            |         |
| $\varepsilon$ (47) | 47-44      | 80 (1), 83 (1), 87 (1), 88 (1), 92 (1)                         | 0.59 <sup>f</sup>    | 0.59       | 1.17    |

a :  $P_{37-35}=2*0.2636*0.2104+2*0.3797*0.2707-2*0.1101*0.0901-2*0.0615*0.4254+2*0.2324*0.4149=0.46$

b :  $P_{37-38}=2*0.2104*0.1257+2*0.2707*0.1703+2*0.0901*0.1310+2*0.4254*0.1861-2*0.4149*0.1387=0.23$

c :  $P_{37-39}=2*0.2104*0.1463+2*0.2707*0.1642+2*0.0901*0.144+2*0.4254*0.3556+2*0.1085*0.1250-2*0.4149*0.1309=0.39$

d :  $P_{42-39}=2*0.0998*0.1463+2*0.1166*0.1642+2*0.1050*0.0931+2*0.1712*0.144+2*0.2004*0.1307+2*0.3716*0.3394+2*0.2921*0.2420+2*0.3278*0.1309=0.65$

e :  $P_{42-44}=2*0.0998*0.0862+2*0.1166*0.1199+2*0.1050*0.1277+2*0.1712*0.1952+2*0.2004*0.2517-2*0.3278*0.1066=0.17$

f :  $P_{47-44}=2*0.1066*0.1952+2*0.1427*0.2517+2*0.4004*0.4372+2*0.0961*0.0959+2*0.5241*0.1066=0.59$

### 3.3 The occupied $\pi$ -type molecular orbitals associated with the active sites of M1b

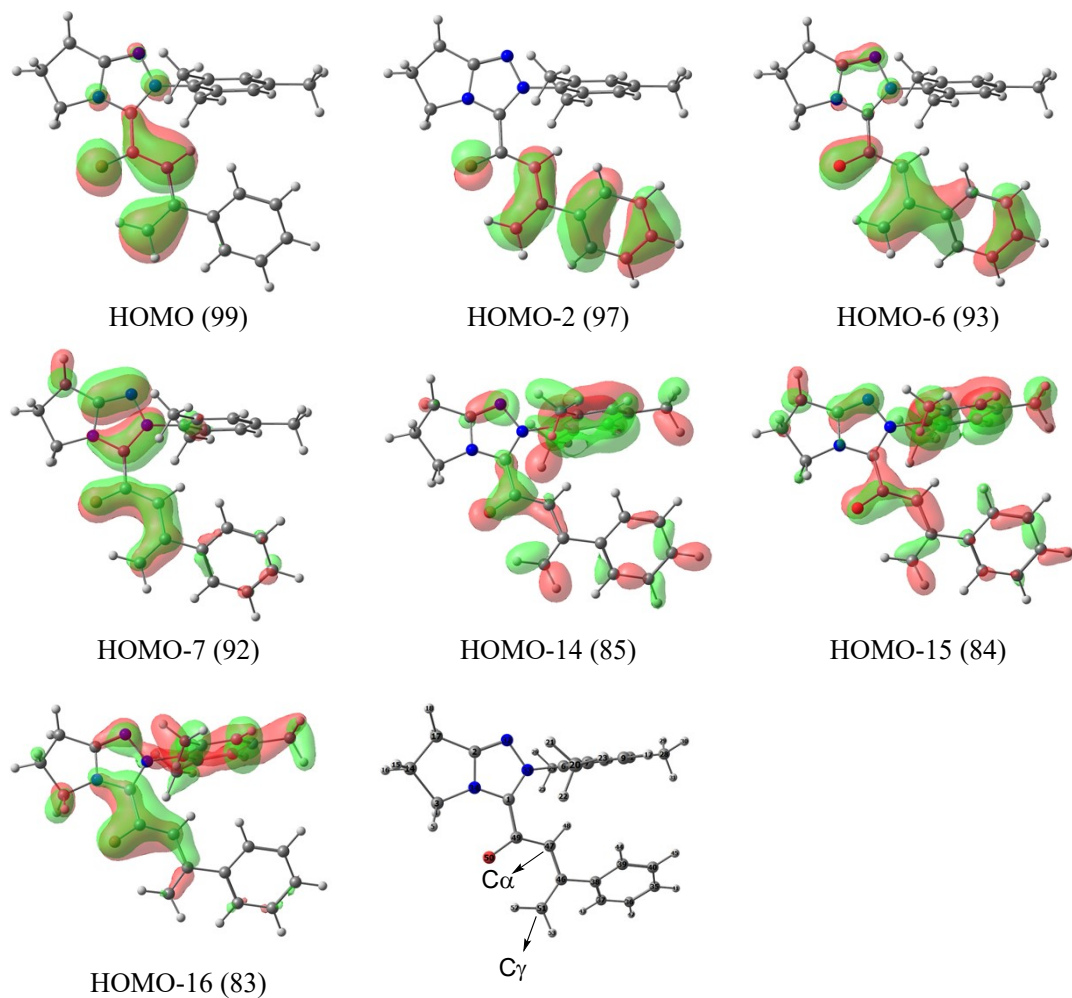

**Fig. S6.** The occupied  $\pi$ -type molecular orbitals associated with the active sites of M1b

### 3.3.1 Molecular orbital coefficients of M1b

|    |     | 83       | 84       | 85       | 89       | 92       | 93       | 97       | 99       |
|----|-----|----------|----------|----------|----------|----------|----------|----------|----------|
| 1C | 1S  | 0.00908  | -0.00616 | -0.00382 | 0.00207  | 0.00118  | 0.00087  | -0.00447 | 0.00002  |
|    | 2S  | -0.02221 | 0.01307  | 0.007    | -0.00449 | -0.00168 | -0.00282 | 0.0115   | 0.00427  |
|    | 2PX | 0.01558  | -0.01177 | -0.0191  | 0.01196  | 0.02035  | 0.00165  | -0.01246 | 0.00048  |
|    | 2PY | -0.01986 | 0.00655  | 0.00293  | 0.01868  | 0.02856  | -0.00108 | -0.01145 | 0.0046   |
|    | 2PZ | 0.14536  | -0.05257 | 0.07879  | 0.04072  | -0.23833 | 0.05779  | -0.00252 | -0.0762  |
|    | 3S  | -0.03293 | 0.02998  | 0.00914  | -0.01259 | -0.01041 | -0.00234 | 0.01625  | -0.01784 |
|    | 3PX | 0.01294  | 0.00433  | 0.00333  | 0.00609  | 0.01474  | 0.00452  | -0.00942 | -0.01865 |
|    | 3PY | -0.01204 | 0.0031   | -0.0128  | -0.01172 | 0.01677  | 0.00704  | -0.00572 | 0.02201  |
|    | 3PZ | 0.09066  | -0.03629 | 0.05192  | 0.01162  | -0.14842 | 0.03227  | -0.00219 | -0.10782 |
|    | 4XX | 0.0004   | -0.00119 | -0.00224 | -0.00211 | 0.00047  | 0.00101  | 0.00067  | 0.00049  |
|    | 4YY | 0.00236  | -0.0018  | 0.00033  | 0.00193  | 0.00249  | -0.00276 | -0.001   | -0.00165 |
|    | 4ZZ | -0.00132 | 0.00107  | -0.00071 | 0.00011  | -0.00273 | 0.00175  | -0.00006 | 0.0022   |
|    | 4XY | -0.00107 | -0.00035 | 0.00023  | -0.00093 | 0.00185  | -0.00071 | 0.00005  | -0.0023  |
|    | 4XZ | 0.00006  | 0.00499  | -0.0022  | 0.01586  | -0.0057  | 0.00439  | 0.00058  | 0.0109   |
|    | 4YZ | -0.00747 | 0.0023   | -0.00386 | -0.00908 | -0.01557 | 0.0078   | -0.00175 | 0.00742  |
| 2C | 1S  | -0.00179 | 0.00011  | -0.00487 | 0.00432  | 0.00143  | 0        | -0.00079 | -0.00038 |
|    | 2S  | 0.00402  | 0.00135  | 0.01235  | -0.00908 | -0.00247 | 0.00025  | 0.00191  | 0.00104  |
|    | 2PX | -0.00696 | -0.02552 | -0.02115 | -0.00976 | -0.01998 | 0.0071   | -0.00051 | 0.00084  |
|    | 2PY | 0.01154  | -0.00436 | 0.03554  | -0.02061 | -0.02167 | 0.01246  | 0.00165  | 0.00384  |
|    | 2PZ | -0.05586 | 0.09904  | -0.07435 | 0.08725  | 0.25883  | -0.069   | 0.0006   | -0.04191 |
|    | 3S  | 0.00732  | -0.00605 | 0.01256  | -0.03015 | -0.01221 | -0.00084 | 0.00046  | -0.00609 |
|    | 3PX | -0.00224 | 0.00056  | 0.00487  | -0.00566 | -0.00938 | -0.00258 | 0.00651  | 0.01654  |
|    | 3PY | 0.01059  | -0.00518 | 0.01245  | 0.00541  | -0.0176  | 0.00895  | 0.00021  | 0.00244  |
|    | 3PZ | -0.04136 | 0.0652   | -0.04847 | 0.04923  | 0.17588  | -0.04598 | -0.00324 | -0.04558 |
|    | 4XX | 0.00003  | -0.00032 | -0.00206 | -0.00033 | 0.00116  | 0.0001   | 0.00016  | 0.00006  |
|    | 4YY | 0.00044  | 0.00138  | -0.00006 | 0.00476  | -0.00085 | 0.00052  | -0.0007  | 0.00016  |
|    | 4ZZ | -0.00107 | -0.00115 | -0.00021 | -0.00329 | 0.00018  | -0.00043 | 0.00011  | -0.00088 |
|    | 4XY | -0.00037 | 0.00041  | -0.00094 | 0.00158  | 0.00012  | 0.0002   | -0.00036 | 0.00019  |
|    | 4XZ | 0.00268  | -0.0082  | 0.0053   | -0.00397 | -0.01003 | 0.00224  | -0.00005 | 0.0005   |
|    | 4YZ | -0.00727 | 0.00251  | -0.00456 | -0.01671 | 0.01219  | -0.006   | 0.00084  | -0.00631 |
| 3C | 1S  | -0.00164 | -0.00211 | 0.00065  | -0.00401 | -0.00148 | -0.00029 | -0.00131 | -0.00049 |
|    | 2S  | 0.00414  | 0.005    | -0.00023 | 0.00667  | 0.00128  | 0.00113  | 0.00322  | 0.00068  |
|    | 2PX | 0.00993  | 0.01395  | 0.00151  | 0.01129  | 0.00599  | -0.00309 | -0.00352 | 0.00007  |
|    | 2PY | -0.0032  | 0.0086   | 0.02234  | -0.00026 | 0.00362  | -0.00056 | -0.00433 | -0.00039 |
|    | 2PZ | -0.09309 | -0.04368 | -0.0012  | -0.14635 | -0.00029 | 0.00048  | -0.00993 | -0.02072 |
|    | 3S  | 0.00487  | 0.00719  | -0.0054  | 0.03451  | 0.01727  | 0.00014  | 0.008    | 0.00847  |
|    | 3PX | -0.00565 | 0.00946  | -0.01647 | 0.01197  | 0.00009  | 0.01455  | -0.00675 | -0.02792 |
|    | 3PY | -0.01532 | 0.0065   | 0.00531  | 0.00554  | -0.00275 | 0.01703  | -0.01668 | -0.02854 |
|    | 3PZ | -0.05129 | -0.01968 | 0.00052  | -0.07318 | 0.00619  | 0.00429  | -0.01476 | -0.03236 |
|    | 4XX | 0.00177  | 0.00095  | 0.00102  | 0.00262  | -0.0003  | 0.00027  | -0.00068 | 0.00084  |
|    | 4YY | 0.00008  | 0.00075  | 0.00016  | 0.00086  | 0.00025  | -0.00023 | 0.00014  | -0.0001  |
|    | 4ZZ | -0.00239 | -0.00198 | -0.0005  | -0.00463 | -0.00039 | -0.00003 | 0.00008  | -0.00108 |

|    |     |          |          |          |          |          |          |          |          |
|----|-----|----------|----------|----------|----------|----------|----------|----------|----------|
|    | 4XY | 0.00191  | 0.0016   | -0.0003  | 0.00326  | 0.00103  | -0.00055 | -0.00028 | 0.00076  |
|    | 4XZ | 0.00033  | 0.0016   | -0.00131 | -0.00234 | 0.00219  | -0.00121 | 0.00017  | -0.00173 |
|    | 4YZ | 0.00627  | 0.00394  | -0.00019 | 0.01717  | -0.00077 | 0.00175  | -0.00004 | 0.00454  |
| 4H | 1S  | -0.05778 | -0.03185 | -0.00763 | -0.10668 | 0.00061  | -0.00293 | -0.00215 | -0.02234 |
|    | 2S  | -0.04821 | -0.03679 | -0.00029 | -0.11926 | 0.0006   | -0.01495 | 0.0057   | -0.01638 |
|    | 3PX | -0.00051 | 0.00027  | -0.00018 | -0.00104 | 0.00018  | 0.00002  | -0.00016 | -0.00065 |
|    | 3PY | -0.00114 | -0.00065 | 0.00026  | -0.00191 | -0.0001  | -0.00009 | 0.00005  | 0.00041  |
|    | 3PZ | 0.00068  | 0.00044  | 0.00036  | 0.0013   | -0.00012 | 0.00012  | -0.0001  | 0        |
| 5H | 1S  | 0.04491  | 0.02319  | -0.00947 | 0.08681  | -0.0019  | 0.00546  | 0.00316  | 0.01069  |
|    | 2S  | 0.01718  | 0.03172  | -0.01045 | 0.08174  | -0.00817 | 0.03003  | -0.02461 | -0.0325  |
|    | 3PX | 0.00197  | -0.00013 | -0.0001  | 0.00222  | -0.00007 | -0.00035 | 0.00111  | 0.00143  |
|    | 3PY | 0.00116  | 0.00086  | -0.00025 | 0.00221  | 0        | 0.00036  | -0.00015 | -0.00071 |
|    | 3PZ | -0.00015 | -0.00009 | -0.00034 | -0.0001  | -0.00012 | 0.00021  | -0.00002 | -0.00019 |
| 6C | 1S  | 0.00846  | 0.00003  | 0.00088  | 0.00124  | -0.00029 | 0.00004  | 0.00048  | -0.00003 |
|    | 2S  | -0.01876 | -0.0006  | -0.00052 | -0.00526 | 0.00178  | 0.00243  | -0.00087 | -0.00566 |
|    | 2PX | 0.00322  | 0.06929  | 0.10231  | -0.00314 | 0.00675  | 0.00474  | 0.00421  | 0.0039   |
|    | 2PY | -0.05353 | 0.07139  | 0.12148  | -0.00053 | 0.00965  | 0.00334  | 0.00391  | 0.00492  |
|    | 2PZ | -0.09472 | -0.13652 | 0.08469  | 0.0875   | 0.0592   | -0.01574 | 0.00276  | -0.00106 |
|    | 3S  | -0.01269 | 0.00239  | -0.00447 | 0.00355  | -0.0004  | -0.01001 | -0.00323 | 0.0207   |
|    | 3PX | -0.04069 | 0.03986  | 0.05172  | 0.01209  | 0.00595  | -0.00008 | 0.00635  | 0.01242  |
|    | 3PY | 0.00159  | 0.04266  | 0.07828  | -0.0074  | 0.00725  | 0.01011  | 0.00183  | -0.01455 |
|    | 3PZ | -0.01667 | -0.08526 | 0.05836  | -0.00044 | -0.02471 | -0.00496 | 0.00045  | -0.03006 |
|    | 4XX | 0.00576  | -0.00249 | -0.00289 | 0.00111  | 0.00142  | -0.00011 | 0.00026  | -0.00151 |
|    | 4YY | 0.00126  | 0.00265  | 0.00478  | 0.00043  | -0.00058 | 0.00031  | 0.0002   | 0.0004   |
|    | 4ZZ | -0.0037  | -0.00024 | -0.00124 | -0.00152 | -0.00048 | 0.00045  | -0.00008 | -0.00021 |
|    | 4XY | -0.00344 | -0.00164 | -0.00305 | 0.00013  | -0.00039 | 0.00026  | 0.00032  | -0.00005 |
|    | 4XZ | 0.00187  | 0.00436  | -0.00329 | -0.00937 | -0.00905 | 0.00259  | -0.00006 | 0.00565  |
|    | 4YZ | -0.00145 | -0.0035  | 0.00223  | 0.0066   | 0.0075   | -0.00309 | 0.00008  | -0.00354 |
| 7C | 1S  | 0.00014  | 0.00159  | -0.00169 | 0.00865  | 0.00933  | -0.00315 | 0.00055  | -0.00377 |
|    | 2S  | 0.00062  | -0.00169 | 0.00264  | -0.01926 | -0.01716 | 0.00796  | -0.00376 | 0.003    |
|    | 2PX | -0.12378 | 0.01756  | 0.05669  | -0.03001 | -0.02329 | 0.0141   | 0.00354  | 0.0154   |
|    | 2PY | 0.03796  | 0.08342  | 0.10322  | 0.0278   | 0.02989  | -0.00017 | 0.00662  | 0.00514  |
|    | 2PZ | 0.10586  | 0.14096  | -0.0711  | -0.07648 | -0.05217 | 0.01483  | -0.00197 | 0.01148  |
|    | 3S  | 0.00693  | -0.02154 | 0.02114  | -0.04854 | -0.06461 | 0.01028  | 0.00253  | 0.0176   |
|    | 3PX | -0.01879 | 0.01988  | 0.03969  | -0.02437 | -0.031   | 0.01456  | -0.00172 | -0.01606 |
|    | 3PY | -0.00981 | 0.03892  | 0.06222  | 0.02237  | 0.02781  | 0.00135  | -0.00228 | -0.00018 |
|    | 3PZ | -0.01417 | -0.00496 | 0.00293  | -0.01769 | -0.03244 | 0.00238  | 0.00354  | 0.00518  |
|    | 4XX | 0.00386  | -0.00249 | -0.00344 | 0.00079  | 0.00185  | -0.00039 | -0.00047 | -0.00205 |
|    | 4YY | 0.00079  | 0.00292  | 0.00393  | 0.00111  | 0.00103  | -0.00018 | 0.00014  | -0.0004  |
|    | 4ZZ | -0.00616 | -0.00232 | -0.00002 | -0.00036 | -0.00007 | 0.00028  | -0.00053 | -0.00144 |
|    | 4XY | -0.00194 | -0.00121 | -0.00233 | -0.0005  | -0.00109 | 0.00025  | 0.00025  | 0.00152  |
|    | 4XZ | 0.00541  | 0.01093  | 0.00146  | -0.00289 | -0.00166 | 0.00055  | 0.00005  | -0.00021 |
|    | 4YZ | -0.00615 | -0.00199 | 0.01049  | 0.00238  | 0.0016   | 0        | -0.00002 | 0.00001  |
| 8C | 1S  | -0.00621 | -0.00318 | -0.00083 | -0.00782 | -0.00909 | 0.00318  | 0        | 0.00389  |

|     |     |          |          |          |          |          |          |          |          |
|-----|-----|----------|----------|----------|----------|----------|----------|----------|----------|
|     | 2S  | 0.01455  | 0.00477  | 0.00286  | 0.01589  | 0.01771  | -0.00697 | 0.00039  | -0.00738 |
|     | 2PX | -0.06201 | 0.04143  | 0.06055  | 0.03412  | 0.02625  | -0.01261 | 0.00177  | -0.00517 |
|     | 2PY | 0.01661  | 0.04802  | 0.11732  | -0.02098 | -0.03097 | 0.00373  | 0.00034  | 0.01238  |
|     | 2PZ | 0.08928  | 0.13832  | -0.08162 | -0.06979 | -0.05031 | 0.0138   | -0.0006  | 0.0123   |
|     | 3S  | 0.00388  | 0.03098  | -0.01022 | 0.05536  | 0.06182  | -0.01474 | 0.00081  | -0.00385 |
|     | 3PX | -0.03888 | 0.0228   | 0.03787  | 0.02048  | 0.03194  | -0.00653 | 0.00141  | 0.00949  |
|     | 3PY | 0.00505  | 0.03711  | 0.0604   | -0.01498 | -0.02526 | -0.00504 | 0.00491  | 0.02155  |
|     | 3PZ | 0.03154  | -0.00514 | 0.00842  | -0.0239  | -0.02795 | 0.00483  | 0.00046  | -0.00264 |
|     | 4XX | 0.00143  | -0.00291 | -0.0027  | -0.00106 | -0.00025 | 0.00084  | 0.00027  | 0.00174  |
|     | 4YY | -0.00031 | 0.0014   | 0.00406  | -0.00008 | -0.00194 | -0.00002 | 0.00003  | -0.0001  |
|     | 4ZZ | -0.00191 | 0.00237  | -0.00313 | -0.0005  | -0.00012 | -0.00007 | 0.00011  | 0.00067  |
|     | 4XY | -0.00038 | -0.00034 | -0.00176 | 0.00043  | 0.0011   | -0.00019 | 0.00006  | -0.0012  |
|     | 4XZ | 0.00819  | 0.0039   | -0.00951 | -0.00282 | -0.00239 | 0.00044  | -0.00012 | -0.00035 |
|     | 4YZ | -0.00257 | -0.01048 | -0.00362 | 0.00251  | 0.00114  | -0.00015 | -0.00017 | -0.00055 |
| 9C  | 1S  | 0.00344  | 0.00555  | -0.00434 | -0.0048  | -0.00447 | 0.00112  | 0.00003  | 0.00222  |
|     | 2S  | -0.00966 | -0.01566 | 0.01273  | 0.01218  | 0.01125  | -0.00305 | -0.00126 | -0.00515 |
|     | 2PX | 0.08424  | 0.09571  | 0.08014  | 0.0212   | 0.01504  | -0.0029  | 0.00343  | -0.00296 |
|     | 2PY | -0.10906 | 0.03517  | 0.09601  | -0.00533 | -0.01555 | 0.00621  | 0.00477  | 0.00948  |
|     | 2PZ | -0.13298 | -0.14549 | 0.07129  | 0.04363  | 0.02216  | -0.00493 | 0.00028  | -0.00071 |
|     | 3S  | 0.00577  | -0.006   | 0.0011   | 0.00588  | 0.00378  | 0.00216  | 0.00115  | -0.01921 |
|     | 3PX | 0.02062  | 0.04612  | 0.04472  | 0.00821  | 0.00269  | -0.00038 | 0.0035   | -0.00561 |
|     | 3PY | -0.04631 | 0.03091  | 0.06016  | 0.0015   | -0.00331 | 0.00091  | 0.00334  | 0.02011  |
|     | 3PZ | -0.02839 | -0.01819 | 0.00274  | 0.00556  | 0.00524  | 0.00243  | -0.00009 | 0.00603  |
|     | 4XX | 0.0015   | 0.00193  | 0.00368  | 0.00024  | 0.00041  | 0.00035  | 0.00015  | 0.00115  |
|     | 4YY | 0.00298  | -0.00185 | -0.00218 | 0.00008  | -0.00065 | -0.00036 | -0.00039 | -0.00064 |
|     | 4ZZ | -0.00253 | 0.00361  | -0.00372 | -0.00232 | -0.00147 | 0.00039  | -0.00028 | 0.00018  |
|     | 4XY | -0.00297 | 0.00003  | -0.00005 | -0.00032 | 0.00015  | -0.00001 | 0.00021  | 0.00027  |
|     | 4XZ | 0.00594  | 0.01055  | -0.00137 | -0.00341 | -0.00244 | 0.00046  | -0.00013 | 0.0001   |
|     | 4YZ | -0.00611 | -0.00426 | 0.00781  | 0.00317  | 0.00131  | -0.00068 | 0.00014  | -0.0006  |
| 10C | 1S  | -0.00425 | -0.00572 | 0.00269  | 0.00451  | 0.00436  | -0.00137 | 0        | -0.00197 |
|     | 2S  | 0.01334  | 0.01784  | -0.00815 | -0.01172 | -0.01075 | 0.00297  | -0.00122 | 0.00626  |
|     | 2PX | 0.01918  | 0.02778  | 0.10605  | -0.01067 | -0.02834 | -0.00194 | -0.00075 | 0.00106  |
|     | 2PY | -0.0503  | 0.0719   | 0.084    | 0.01818  | -0.00086 | -0.0135  | -0.00047 | -0.01213 |
|     | 2PZ | -0.09843 | -0.14337 | 0.08995  | 0.04302  | 0.01976  | -0.00478 | 0.00077  | -0.00099 |
|     | 3S  | -0.00127 | -0.00558 | -0.00068 | -0.0117  | -0.00553 | 0.00865  | 0.00131  | -0.00254 |
|     | 3PX | -0.01197 | 0.01414  | 0.05784  | -0.00305 | -0.01204 | -0.00033 | -0.00216 | -0.0015  |
|     | 3PY | -0.01163 | 0.04197  | 0.05788  | 0.0095   | -0.00878 | -0.00967 | -0.00397 | -0.01332 |
|     | 3PZ | -0.01562 | -0.01166 | 0.01385  | 0.00708  | 0.00531  | -0.00032 | -0.00115 | 0.01087  |
|     | 4XX | 0.00173  | 0.00147  | 0.00474  | 0.00019  | 0.00009  | -0.00014 | -0.00023 | 0.00013  |
|     | 4YY | 0.00204  | -0.00143 | -0.00284 | 0.0001   | 0.00038  | -0.00012 | -0.00014 | -0.00031 |
|     | 4ZZ | -0.0072  | -0.0035  | -0.00008 | 0.00145  | 0.0011   | -0.00031 | -0.00021 | -0.00004 |
|     | 4XY | -0.002   | 0.00104  | 0.00007  | -0.00009 | -0.00028 | 0.00006  | 0.00005  | 0.00031  |
|     | 4XZ | 0.00848  | 0.00729  | -0.00766 | -0.00386 | -0.00204 | 0.00084  | -0.00007 | 0.00056  |
|     | 4YZ | -0.00453 | -0.00928 | -0.00039 | 0.00244  | 0.00204  | -0.00026 | -0.00001 | -0.00002 |

|     |     |          |          |          |          |          |          |          |          |
|-----|-----|----------|----------|----------|----------|----------|----------|----------|----------|
| 11C | 1S  | 0.00131  | -0.00014 | 0.00064  | -0.0001  | -0.00003 | 0.00003  | 0.00001  | -0.00004 |
|     | 2S  | -0.00272 | 0.00043  | -0.00171 | 0.00006  | 0.00025  | 0.00025  | -0.00119 | 0.00033  |
|     | 2PX | -0.10769 | 0.01918  | 0.04213  | 0.00687  | -0.00693 | -0.0045  | 0.00043  | -0.00632 |
|     | 2PY | 0.04226  | 0.06141  | 0.10497  | 0.00968  | -0.01062 | -0.00604 | 0.00103  | -0.00892 |
|     | 2PZ | 0.14744  | 0.18206  | -0.09331 | -0.04339 | -0.01891 | 0.00399  | -0.00058 | 0.00012  |
|     | 3S  | -0.01749 | 0.00252  | -0.00206 | 0.00109  | 0.00023  | -0.0024  | 0.00208  | 0.00274  |
|     | 3PX | -0.02092 | 0.02278  | 0.04034  | 0.0053   | -0.00331 | -0.00447 | -0.00144 | -0.00219 |
|     | 3PY | -0.00823 | 0.03188  | 0.05447  | 0.00362  | -0.00638 | -0.00162 | 0.00045  | -0.01017 |
|     | 3PZ | 0.0588   | 0.08324  | -0.04303 | -0.0201  | -0.00775 | 0.00293  | -0.00086 | 0.01098  |
|     | 4XX | 0.00148  | 0.00461  | 0.00892  | 0.0006   | -0.00033 | -0.00021 | -0.00005 | 0        |
|     | 4YY | 0.00408  | -0.00422 | -0.00666 | -0.00036 | 0.00049  | 0.0002   | -0.00023 | 0.00017  |
|     | 4ZZ | -0.00444 | -0.00007 | -0.00193 | -0.00033 | -0.00005 | 0.00003  | -0.0002  | 0.00014  |
|     | 4XY | -0.00404 | 0.00139  | 0.00167  | 0        | -0.00026 | -0.00004 | 0.00009  | -0.00008 |
|     | 4XZ | 0.00675  | 0.00782  | -0.00368 | -0.00232 | -0.00166 | 0.00005  | -0.00014 | 0.00019  |
|     | 4YZ | -0.00508 | -0.00639 | 0.00337  | 0.00176  | 0.00073  | -0.00071 | -0.00011 | -0.00068 |
| 12H | 1S  | 0.03983  | 0.0798   | -0.04903 | -0.03517 | -0.02081 | 0.00538  | -0.00063 | 0.00299  |
|     | 2S  | 0.05014  | 0.10266  | -0.06696 | -0.04724 | -0.02912 | 0.00883  | -0.00108 | 0.00805  |
|     | 3PX | 0.00185  | 0.00304  | 0.00091  | 0.00001  | 0.00009  | 0        | 0.00012  | 0.00009  |
|     | 3PY | -0.00234 | -0.00017 | 0.00255  | 0.00028  | -0.00014 | 0.00014  | 0.00009  | 0.00005  |
|     | 3PZ | -0.00075 | 0.00033  | -0.00032 | -0.00045 | -0.00031 | 0.00008  | 0.00004  | -0.00004 |
| 13H | 1S  | -0.08476 | -0.08553 | 0.04176  | 0.03395  | 0.02042  | -0.00532 | 0.0003   | -0.00327 |
|     | 2S  | -0.10956 | -0.11218 | 0.0524   | 0.04436  | 0.0286   | -0.00793 | 0.00089  | -0.00948 |
|     | 3PX | -0.00124 | -0.00097 | 0.00289  | 0.0004   | -0.00035 | -0.00016 | 0.00002  | -0.00009 |
|     | 3PY | 0.00007  | 0.00243  | 0.00119  | -0.00002 | -0.00021 | -0.00027 | 0.00001  | -0.00023 |
|     | 3PZ | 0.00117  | 0.00041  | 0.00002  | -0.00042 | -0.00031 | 0.00006  | -0.00005 | -0.00001 |
| 14C | 1S  | -0.00188 | -0.00281 | -0.00111 | -0.00457 | -0.00354 | 0.001    | 0.00031  | -0.00169 |
|     | 2S  | 0.00413  | 0.00758  | 0.00091  | 0.01591  | 0.0073   | 0.00093  | -0.00208 | 0.00112  |
|     | 2PX | -0.01838 | -0.01392 | -0.01309 | -0.02756 | -0.00226 | -0.0001  | 0.00297  | -0.00766 |
|     | 2PY | -0.00702 | 0.01054  | -0.00529 | -0.00171 | 0.02091  | -0.00336 | 0.00157  | -0.00803 |
|     | 2PZ | 0.04658  | 0.06041  | -0.01854 | 0.06326  | 0.02327  | -0.00518 | 0.00156  | 0.00107  |
|     | 3S  | 0.01306  | 0.00986  | 0.01634  | -0.00373 | 0.02511  | -0.02567 | 0.00594  | 0.02755  |
|     | 3PX | -0.01402 | -0.00037 | -0.01347 | 0.00785  | 0.00672  | 0.00906  | -0.00426 | -0.01642 |
|     | 3PY | -0.01054 | 0.00497  | -0.00612 | -0.01798 | 0.01664  | -0.00531 | 0.00237  | -0.0169  |
|     | 3PZ | 0.02004  | 0.03258  | -0.009   | 0.02759  | 0.00896  | -0.00114 | -0.00097 | 0.00584  |
|     | 4XX | 0.00186  | 0.00152  | 0.00006  | 0.00233  | -0.00003 | -0.00014 | 0.00014  | 0.00021  |
|     | 4YY | 0.00122  | 0.00279  | -0.00178 | 0.00324  | 0.00194  | -0.00015 | 0.00009  | -0.00018 |
|     | 4ZZ | -0.00318 | -0.00463 | 0.00141  | -0.00515 | -0.00262 | 0.00095  | -0.00038 | -0.00056 |
|     | 4XY | 0.0005   | 0.00057  | 0.00089  | 0.00144  | 0.00072  | -0.00018 | 0.00003  | 0.00047  |
|     | 4XZ | 0.00266  | 0.00159  | -0.00041 | 0.00308  | -0.00064 | 0.0002   | 0.00024  | -0.00008 |
|     | 4YZ | 0.00136  | -0.00043 | 0.00084  | 0.00181  | -0.00115 | 0.00047  | 0.00008  | 0.00059  |
| 15H | 1S  | -0.03601 | -0.0443  | 0.01309  | -0.05003 | -0.0169  | 0.0047   | -0.00245 | -0.00195 |
|     | 2S  | -0.03769 | -0.04661 | 0.01304  | -0.0627  | -0.02572 | 0.0076   | -0.00368 | -0.00393 |
|     | 3PX | -0.00016 | 0.00012  | -0.00037 | -0.0004  | 0.0003   | -0.00023 | 0.00015  | -0.00001 |
|     | 3PY | -0.00034 | 0.00032  | -0.00015 | -0.00021 | 0.00063  | -0.00013 | 0        | -0.00021 |



|     |     |          |          |          |          |          |          |          |          |
|-----|-----|----------|----------|----------|----------|----------|----------|----------|----------|
|     | 3PZ | -0.00084 | -0.0009  | 0.0002   | -0.00109 | -0.00024 | 0.00005  | -0.00003 | 0.00001  |
| 16H | 1S  | 0.01167  | 0.01343  | -0.01107 | 0.01403  | 0.00279  | -0.00158 | 0.00167  | -0.00063 |
|     | 2S  | 0.00991  | 0.00811  | -0.0108  | -0.00163 | -0.00408 | -0.0028  | 0.00428  | -0.00721 |
|     | 3PX | -0.0005  | -0.00068 | 0.00029  | -0.00076 | -0.00037 | 0.00008  | 0.00003  | 0.00005  |
|     | 3PY | 0.0004   | 0.00039  | -0.0001  | 0.0005   | 0.00016  | -0.00005 | 0.0001   | 0.00001  |
|     | 3PZ | 0.0007   | 0.00075  | -0.00004 | 0.00097  | 0.00027  | 0        | -0.00003 | -0.00011 |
| 17C | 1S  | -0.00229 | -0.00052 | 0.00218  | -0.00335 | -0.00034 | -0.00043 | -0.00051 | -0.00098 |
|     | 2S  | 0.00443  | 0.00217  | -0.00495 | 0.00412  | 0.00163  | -0.00021 | 0.00153  | 0.00121  |
|     | 2PX | 0.00461  | 0.02449  | 0.01183  | 0.01495  | 0.00863  | -0.00402 | -0.00071 | -0.00065 |
|     | 2PY | -0.01737 | -0.0044  | -0.00372 | -0.01262 | 0.00575  | -0.00322 | -0.00167 | -0.0023  |
|     | 2PZ | 0.00263  | -0.07724 | 0.04746  | -0.0611  | -0.07991 | 0.01702  | -0.00095 | 0.00422  |
|     | 3S  | 0.01321  | -0.00483 | -0.01438 | 0.03582  | -0.00168 | 0.01185  | -0.00241 | 0.00047  |
|     | 3PX | 0.00409  | 0.01706  | 0.00958  | 0.0001   | 0.00402  | -0.00643 | 0.00295  | 0.00142  |
|     | 3PY | -0.01567 | 0.00032  | -0.00402 | -0.02641 | 0.00978  | -0.006   | -0.00146 | -0.01085 |
|     | 3PZ | 0.00927  | -0.04135 | 0.0281   | -0.01961 | -0.03583 | 0.00324  | 0.00295  | 0.00801  |
|     | 4XX | -0.00085 | 0.00037  | -0.00154 | 0.00025  | 0.00209  | -0.00059 | 0.00005  | -0.00062 |
|     | 4YY | 0.001    | 0.00409  | -0.00108 | 0.00394  | 0.0035   | -0.00057 | -0.00015 | -0.00031 |
|     | 4ZZ | -0.00046 | -0.00441 | 0.00297  | -0.00496 | -0.0056  | 0.00116  | -0.00001 | 0.00036  |
|     | 4XY | -0.00013 | 0.00189  | -0.00083 | 0.0024   | 0.00216  | -0.00069 | -0.00024 | -0.00004 |
|     | 4XZ | 0.00218  | -0.00491 | 0.00333  | -0.00464 | -0.01135 | 0.00299  | 0.00003  | 0.00184  |
|     | 4YZ | -0.00078 | -0.00226 | 0.00094  | -0.00263 | -0.0008  | 0.00002  | 0.00009  | -0.00045 |
| 18H | 1S  | -0.00516 | 0.04315  | -0.02111 | 0.03591  | 0.05121  | -0.01333 | -0.00063 | -0.00425 |
|     | 2S  | -0.00167 | 0.04004  | -0.01867 | 0.05085  | 0.05546  | -0.01493 | -0.0016  | 0.00019  |
|     | 3PX | -0.00026 | -0.00024 | 0.00031  | -0.00053 | 0.00029  | -0.00012 | -0.00006 | -0.00048 |
|     | 3PY | 0.00004  | -0.00122 | 0.00058  | -0.00092 | -0.00156 | 0.00047  | -0.0001  | 0.00009  |
|     | 3PZ | -0.00004 | -0.00035 | 0.00034  | -0.00023 | -0.0006  | 0.00014  | -0.00006 | 0.00005  |
| 19H | 1S  | 0.00394  | -0.05335 | 0.03597  | -0.04713 | -0.07024 | 0.01582  | -0.00037 | 0.00704  |
|     | 2S  | -0.0026  | -0.05416 | 0.03404  | -0.06253 | -0.08348 | 0.02104  | -0.00241 | 0.00539  |
|     | 3PX | 0.00045  | 0.00079  | 0.00004  | 0.00081  | -0.0004  | 0.00016  | 0        | 0.00036  |
|     | 3PY | -0.00039 | 0.00015  | -0.00028 | 0.00023  | 0.00078  | -0.00025 | 0        | -0.00008 |
|     | 3PZ | -0.00008 | 0.00077  | -0.00059 | 0.00063  | 0.00104  | -0.00024 | 0.00003  | -0.0001  |
| 20C | 1S  | 0.01107  | 0.0124   | -0.00634 | -0.00079 | -0.00103 | -0.00032 | 0.00115  | 0.00484  |
|     | 2S  | -0.02412 | -0.02525 | 0.01218  | 0.00133  | -0.00153 | 0.00128  | -0.00147 | -0.00414 |
|     | 2PX | 0.10064  | 0.02838  | -0.09032 | -0.02773 | -0.00773 | -0.00273 | 0.00143  | 0.00583  |
|     | 2PY | -0.08225 | -0.09171 | -0.09449 | 0.01193  | 0.01298  | -0.0096  | 0.00537  | 0.02052  |
|     | 2PZ | -0.09929 | -0.11603 | 0.05498  | 0.02552  | 0.01227  | -0.00201 | -0.00096 | -0.00246 |
|     | 3S  | -0.07772 | -0.08168 | 0.0442   | 0.01642  | 0.03427  | -0.00359 | -0.01313 | -0.06787 |
|     | 3PX | 0.04938  | 0.02702  | -0.05134 | -0.02035 | 0.01134  | -0.00295 | 0.00072  | 0.00225  |
|     | 3PY | -0.05699 | -0.04819 | -0.05068 | 0.01004  | 0.00148  | -0.00754 | 0.01195  | 0.04612  |
|     | 3PZ | -0.06456 | -0.06184 | 0.02783  | 0.02742  | 0.01818  | -0.00635 | 0.00301  | 0.01121  |
|     | 4XX | 0.00488  | -0.00193 | -0.00742 | -0.00007 | 0.00025  | -0.00066 | 0.00009  | 0.00035  |
|     | 4YY | 0.00288  | 0.0063   | 0.00746  | 0.00019  | -0.00007 | 0.00062  | -0.00001 | -0.00005 |
|     | 4ZZ | -0.00602 | -0.00197 | -0.00132 | 0.00016  | -0.0004  | -0.00001 | 0.00019  | 0.00126  |
|     | 4XY | 0.00184  | 0.00077  | -0.0009  | -0.00131 | -0.0011  | 0.00032  | -0.0001  | 0.00017  |

|     |     |          |          |          |          |          |          |          |          |
|-----|-----|----------|----------|----------|----------|----------|----------|----------|----------|
|     | 4XZ | 0.00221  | 0.00503  | -0.00096 | -0.00044 | 0.00049  | -0.00001 | 0.00011  | -0.00031 |
|     | 4YZ | -0.00221 | -0.00144 | 0.00524  | 0.00046  | -0.00035 | 0.00053  | 0.00004  | 0.00005  |
| 21H | 1S  | 0.05274  | -0.0084  | -0.07074 | -0.01228 | -0.00418 | -0.0033  | 0.00055  | 0.00286  |
|     | 2S  | 0.0658   | -0.01465 | -0.06354 | -0.00026 | -0.02729 | 0.00141  | 0.00033  | 0.0121   |
|     | 3PX | -0.00055 | 0.00061  | 0.00169  | 0.00059  | 0.00035  | 0.00004  | -0.00001 | -0.00016 |
|     | 3PY | -0.00223 | -0.00155 | -0.00108 | -0.00005 | 0.00007  | 0.00001  | 0        | 0.00023  |
|     | 3PZ | -0.00134 | -0.00221 | 0.00171  | 0.00151  | 0.00026  | 0.00003  | -0.00006 | -0.0005  |
| 22H | 1S  | 0.03923  | 0.06105  | 0.07679  | -0.0046  | -0.00703 | 0.00738  | -0.00205 | -0.00624 |
|     | 2S  | 0.01656  | 0.07227  | 0.05565  | 0.00275  | -0.01112 | -0.00078 | 0.0179   | 0.07734  |
|     | 3PX | 0.00218  | 0.00113  | -0.00086 | -0.00029 | 0.00033  | -0.00001 | -0.00013 | -0.00022 |
|     | 3PY | 0.00081  | 0.00122  | 0.00194  | -0.00024 | -0.00047 | 0.00007  | -0.00001 | -0.00024 |
|     | 3PZ | -0.00203 | -0.00173 | 0.0005   | 0.00091  | 0.00075  | -0.00038 | 0.00034  | 0.00126  |
| 23H | 1S  | -0.00987 | 0.02065  | -0.03288 | -0.00381 | -0.00046 | -0.0009  | 0.00108  | 0.00375  |
|     | 2S  | 0.00029  | 0.03614  | -0.04    | -0.00636 | 0.00277  | -0.00227 | 0.00216  | 0.01027  |
|     | 3PX | 0.0014   | 0.00039  | -0.00216 | -0.00053 | -0.00039 | -0.00004 | 0.00005  | 0.00035  |
|     | 3PY | -0.00092 | -0.0019  | -0.0012  | 0.00025  | 0.00035  | -0.00019 | 0        | 0.00001  |
|     | 3PZ | -0.00194 | -0.0013  | -0.00007 | 0.00023  | 0.00024  | -0.00003 | -0.00002 | -0.00012 |
|     | 1S  | -0.00625 | -0.01138 | 0.00664  | 0.00117  | 0.00141  | 0.00022  | -0.0008  | -0.00362 |
|     | 2S  | 0.01404  | 0.02293  | -0.01301 | -0.00197 | -0.00086 | -0.00031 | 0.00016  | 0.00086  |
|     | 2PX | 0.03774  | -0.09499 | -0.0151  | 0.02728  | -0.00226 | 0.00402  | -0.00117 | -0.00333 |
|     | 2PY | 0.04393  | -0.02665 | -0.10894 | -0.01352 | -0.01747 | 0.00966  | -0.00463 | -0.01484 |
|     | 2PZ | -0.06905 | -0.11521 | 0.06503  | 0.02859  | 0.01488  | -0.00219 | -0.00046 | -0.00209 |
|     | 3S  | 0.02864  | 0.07804  | -0.04842 | -0.01586 | -0.02896 | -0.00094 | 0.01341  | 0.06617  |
|     | 3PX | 0.02216  | -0.05626 | 0.00182  | 0.0149   | -0.01499 | 0.00465  | -0.00008 | 0.00113  |
|     | 3PY | 0.03076  | -0.01265 | -0.05273 | -0.00672 | -0.01258 | 0.01118  | -0.01026 | -0.03801 |
|     | 3PZ | -0.03373 | -0.06424 | 0.03853  | 0.02696  | 0.01536  | -0.00312 | 0.00191  | 0.00479  |
|     | 4XX | 0.00278  | -0.00641 | -0.00454 | -0.00005 | -0.00058 | 0.00076  | -0.00032 | -0.00094 |
|     | 4YY | -0.00266 | 0.00286  | 0.00814  | 0.00022  | 0.00018  | -0.0005  | 0.00023  | 0.00066  |
|     | 4ZZ | -0.00113 | 0.00138  | -0.00233 | -0.00035 | 0.00041  | -0.00005 | -0.00028 | -0.00117 |
|     | 4XY | 0.00084  | -0.00171 | -0.00039 | 0.0014   | 0.00086  | -0.00028 | 0.00008  | -0.00043 |
|     | 4XZ | 0.00457  | 0.00246  | -0.00393 | -0.0002  | -0.00002 | 0.00005  | -0.00003 | -0.00065 |
|     | 4YZ | -0.00224 | -0.00507 | -0.00141 | 0.00039  | -0.00021 | 0.00035  | -0.00011 | -0.00016 |
| 25H | 1S  | -0.02745 | 0.02912  | 0.07909  | 0.00714  | 0.00856  | -0.00625 | 0.0027   | 0.00705  |
|     | 2S  | -0.01077 | 0.01485  | 0.08808  | 0.00317  | 0.00221  | 0.00605  | -0.01474 | -0.06305 |
|     | 3PX | 0.00057  | -0.00149 | 0.00028  | 0.00012  | -0.00062 | 0.0002   | 0.00002  | 0.00023  |
|     | 3PY | -0.00061 | 0.00075  | 0.00183  | 0.00027  | 0.00048  | -0.00005 | -0.00013 | -0.00036 |
|     | 3PZ | -0.00159 | -0.0016  | 0.00111  | 0.00087  | 0.00116  | -0.00047 | 0.00023  | 0.0007   |
| 26H | 1S  | 0.03394  | -0.06591 | -0.03746 | 0.01299  | -0.00149 | 0.0037   | -0.00131 | -0.00504 |
|     | 2S  | 0.01944  | -0.05818 | -0.04642 | 0.00495  | 0.0232   | -0.00343 | -0.00227 | -0.01835 |
|     | 3PX | -0.00103 | 0.00162  | 0.00094  | -0.00078 | 0.00014  | -0.00011 | 0.00004  | 0.0001   |
|     | 3PY | 0.00043  | 0.00031  | -0.00142 | 0        | -0.00022 | 0.00002  | 0.00003  | -0.00006 |
|     | 3PZ | -0.00068 | -0.00238 | 0.00144  | 0.00133  | -0.00007 | 0.00011  | -0.00007 | -0.0004  |
| 27H | 1S  | -0.03784 | -0.0294  | 0.00417  | 0.00183  | 0.00346  | -0.00008 | -0.00088 | -0.00229 |
|     | 2S  | -0.04703 | -0.04279 | 0.01219  | 0.00306  | 0.00349  | -0.0003  | -0.00155 | -0.00598 |

|     |     |          |          |          |          |          |          |          |          |
|-----|-----|----------|----------|----------|----------|----------|----------|----------|----------|
|     | 3PX | 0.0002   | -0.00206 | -0.00049 | 0.00057  | 0.00023  | -0.00001 | -0.00005 | -0.00028 |
|     | 3PY | 0.00115  | -0.00026 | -0.00206 | -0.00026 | -0.00046 | 0.00017  | 0        | 0.00009  |
|     | 3PZ | 0.00001  | -0.00109 | 0.00096  | 0.00039  | 0.00014  | 0.00001  | -0.00005 | -0.00013 |
| 28C | 1S  | -0.00857 | -0.00129 | -0.00256 | 0.00027  | -0.00014 | -0.00024 | -0.00026 | -0.00002 |
|     | 2S  | 0.01799  | 0.00218  | 0.00505  | 0.0001   | -0.00005 | -0.00019 | 0.00003  | -0.00004 |
|     | 2PX | 0.10586  | -0.02131 | -0.03537 | 0.00062  | 0.00338  | 0.00078  | -0.00095 | 0.00114  |
|     | 2PY | -0.03313 | -0.05942 | -0.09894 | -0.00275 | 0.00421  | 0.00131  | -0.00081 | 0.00133  |
|     | 2PZ | -0.06935 | -0.07575 | 0.03414  | 0.00027  | -0.00374 | 0.00157  | 0.0001   | 0.00151  |
|     | 3S  | 0.0548   | 0.01183  | 0.01868  | -0.00401 | 0.00247  | 0.00355  | 0.00338  | 0.00255  |
|     | 3PX | 0.06159  | -0.01078 | -0.01663 | 0.00343  | 0.00069  | -0.00248 | -0.00366 | 0.00088  |
|     | 3PY | -0.01709 | -0.03194 | -0.05201 | -0.00028 | 0.00129  | -0.00044 | -0.00076 | -0.00008 |
|     | 3PZ | -0.0302  | -0.03442 | 0.01603  | 0.00015  | 0.00015  | 0.00095  | 0.0005   | -0.00116 |
|     | 4XX | -0.00075 | 0.0037   | 0.00738  | 0.00056  | -0.00062 | -0.00034 | 0.00004  | -0.00046 |
|     | 4YY | -0.00028 | -0.00236 | -0.00236 | -0.00018 | 0.00032  | 0.00015  | -0.00009 | 0.00038  |
|     | 4ZZ | -0.00055 | -0.00172 | -0.00558 | -0.00018 | 0.00022  | -0.00003 | -0.00012 | 0.00012  |
|     | 4XY | -0.00483 | 0.00202  | 0.00372  | 0.0001   | -0.00035 | -0.00008 | 0.00014  | -0.00026 |
|     | 4XZ | 0.00349  | 0.00319  | -0.00216 | -0.0006  | -0.00016 | -0.00002 | -0.00004 | -0.00023 |
|     | 4YZ | -0.006   | -0.0075  | 0.0021   | 0.00056  | 0.00003  | 0.00005  | -0.00003 | 0.00016  |
| 29H | 1S  | -0.04954 | -0.0743  | -0.02434 | 0.00023  | 0.00115  | 0.00161  | -0.0003  | 0.00215  |
|     | 2S  | -0.05957 | -0.07814 | -0.0214  | 0.00266  | 0.00223  | 0.00095  | -0.00065 | 0.00304  |
|     | 3PX | 0.00199  | -0.00011 | -0.00052 | 0.00001  | 0.00007  | 0.00001  | 0.00002  | -0.00009 |
|     | 3PY | 0.00117  | 0.00116  | -0.00129 | -0.00011 | 0.00009  | 0.00002  | -0.00002 | 0.00004  |
|     | 3PZ | 0.00013  | 0.00086  | 0.00177  | 0.00018  | -0.00003 | -0.00007 | -0.00001 | -0.00006 |
| 30H | 1S  | 0.04029  | 0.03298  | -0.05814 | -0.00372 | 0.0032   | -0.00001 | -0.00022 | 0.00007  |
|     | 2S  | 0.03751  | 0.03806  | -0.06096 | -0.00636 | 0.00231  | 0.00087  | -0.00049 | -0.0001  |
|     | 3PX | 0.00171  | -0.00035 | -0.00061 | -0.00007 | 0.00003  | 0.00008  | 0.00004  | 0.00008  |
|     | 3PY | -0.00146 | -0.002   | -0.00057 | 0.00005  | 0.00007  | 0.00003  | -0.00002 | 0.00006  |
|     | 3PZ | 0.0001   | -0.00047 | -0.0015  | 0.00004  | 0.00018  | 0.00002  | 0        | -0.00002 |
| 31H | 1S  | -0.0454  | 0.03447  | 0.06802  | 0.00214  | -0.00455 | -0.00142 | 0.00084  | -0.00229 |
|     | 2S  | -0.04368 | 0.02819  | 0.06202  | 0.01011  | -0.00699 | -0.00777 | -0.00577 | -0.00383 |
|     | 3PX | 0.00029  | 0.00061  | 0.00149  | 0.00008  | -0.0001  | -0.00012 | -0.00007 | 0.00002  |
|     | 3PY | -0.00204 | -0.00007 | 0.0003   | -0.00005 | -0.00012 | -0.00009 | -0.00004 | -0.00008 |
|     | 3PZ | -0.00143 | -0.00189 | 0.00049  | -0.00002 | -0.00005 | 0.00004  | 0.00003  | 0.00009  |
| 32N | 1S  | 0.0036   | -0.00001 | 0.01234  | -0.00793 | -0.00105 | 0.00147  | 0.00047  | -0.00029 |
|     | 2S  | -0.0082  | -0.00208 | -0.02776 | 0.0153   | 0.00107  | -0.00262 | -0.00094 | -0.00007 |
|     | 2PX | 0.01982  | 0.01496  | 0.04737  | 0.01785  | -0.01383 | 0.0076   | -0.00452 | 0.00156  |
|     | 2PY | -0.00409 | -0.0054  | -0.03261 | 0.04907  | -0.015   | 0.00192  | -0.0082  | 0.00178  |
|     | 2PZ | -0.13028 | 0.12337  | -0.12089 | -0.13035 | 0.28316  | -0.09722 | 0.00776  | -0.06307 |
|     | 3S  | -0.01692 | 0.01173  | -0.04585 | 0.03777  | 0.01026  | -0.01054 | 0.00189  | 0.00867  |
|     | 3PX | 0.00665  | 0.00292  | 0.01716  | 0.00866  | -0.00785 | 0.00488  | -0.00506 | 0.00049  |
|     | 3PY | -0.00105 | -0.00555 | -0.01763 | 0.03128  | -0.01231 | 0.00274  | -0.00783 | -0.00099 |
|     | 3PZ | -0.082   | 0.07702  | -0.07801 | -0.09322 | 0.19967  | -0.07389 | 0.00819  | -0.05294 |
|     | 4XX | -0.00017 | -0.00037 | 0.00121  | -0.00222 | -0.00195 | 0.00093  | 0.00014  | 0.00048  |
|     | 4YY | -0.00067 | 0.00111  | 0.00285  | -0.0035  | 0.00185  | -0.00034 | 0.00034  | -0.0003  |

|     |     |          |          |          |          |          |          |          |          |
|-----|-----|----------|----------|----------|----------|----------|----------|----------|----------|
|     | 4ZZ | 0.00134  | -0.00153 | 0.0001   | 0.00209  | -0.00088 | 0.00027  | -0.00026 | -0.0007  |
|     | 4XY | -0.00134 | -0.00139 | -0.00293 | -0.00164 | -0.00016 | -0.00006 | -0.00009 | -0.00004 |
|     | 4XZ | 0.001    | 0.00202  | -0.00068 | 0.00916  | 0.01298  | -0.00393 | 0.00008  | -0.00546 |
|     | 4YZ | 0.00785  | -0.00876 | 0.0081   | 0.00622  | -0.01612 | 0.00517  | -0.00045 | 0.00213  |
| 33N | 1S  | -0.00861 | 0.00079  | -0.00455 | 0.00217  | 0.00043  | 0.00004  | 0.00167  | 0.0016   |
|     | 2S  | 0.01732  | -0.00136 | 0.01015  | -0.00587 | -0.00138 | 0.00005  | -0.00403 | -0.00148 |
|     | 2PX | -0.02944 | -0.01616 | -0.0142  | 0.00646  | 0.01692  | -0.00515 | 0.00195  | -0.00951 |
|     | 2PY | 0.0257   | -0.00004 | -0.00028 | -0.00159 | 0.01232  | -0.00038 | 0.00839  | -0.00445 |
|     | 2PZ | -0.05971 | -0.01737 | -0.01449 | -0.22104 | -0.25118 | 0.08156  | -0.00175 | 0.11796  |
|     | 3S  | 0.06578  | -0.01035 | 0.02713  | -0.00693 | 0.00037  | -0.0003  | -0.01043 | -0.03016 |
|     | 3PX | -0.02845 | -0.01303 | -0.01444 | 0.01041  | 0.01321  | -0.01097 | 0.00092  | 0.00304  |
|     | 3PY | 0.01748  | -0.00491 | -0.0123  | -0.01039 | 0.01143  | 0.00408  | 0.00208  | -0.01033 |
|     | 3PZ | -0.05236 | 0.00172  | -0.02214 | -0.15163 | -0.18088 | 0.06838  | -0.00471 | 0.12108  |
|     | 4XX | 0.00133  | -0.00451 | -0.00486 | -0.00068 | -0.0019  | 0.00046  | -0.00001 | 0.00059  |
|     | 4YY | -0.00295 | 0.00352  | 0.00504  | 0.00171  | -0.00152 | 0.00085  | 0.00033  | 0.00046  |
|     | 4ZZ | -0.00209 | 0.00163  | -0.00138 | -0.00102 | 0.00322  | -0.00105 | 0.00004  | 0.00032  |
|     | 4XY | 0.00037  | -0.00237 | -0.00438 | 0.00108  | -0.00255 | 0.00006  | 0.00048  | 0.00055  |
|     | 4XZ | -0.00296 | 0.00795  | -0.0071  | -0.00623 | 0.00806  | -0.00285 | 0.00046  | -0.00103 |
|     | 4YZ | -0.00879 | 0.00149  | -0.00376 | -0.00164 | 0.01695  | -0.00519 | 0.00052  | 0.00177  |
| 34N | 1S  | -0.00025 | 0.00125  | 0.00296  | 0.00059  | 0.00012  | -0.00129 | -0.00058 | -0.00102 |
|     | 2S  | 0.00057  | -0.0028  | -0.00666 | -0.00162 | -0.00045 | 0.00353  | 0.00079  | -0.00014 |
|     | 2PX | -0.0206  | 0.00476  | 0.01053  | -0.01983 | 0.0033   | -0.01152 | -0.0007  | -0.01141 |
|     | 2PY | -0.00303 | 0.00628  | -0.01296 | -0.00777 | 0.01     | -0.00998 | -0.0027  | -0.00718 |
|     | 2PZ | 0.07979  | 0.04411  | 0.01405  | 0.3093   | -0.0593  | 0.05638  | -0.0097  | 0.08228  |
|     | 3S  | 0.00061  | -0.00805 | -0.01976 | 0.00235  | -0.0006  | 0.00136  | 0.01072  | 0.03286  |
|     | 3PX | -0.00517 | 0.00725  | 0.00661  | -0.00741 | 0.0038   | -0.00944 | 0.00054  | -0.01999 |
|     | 3PY | -0.00366 | 0.00446  | 0.00129  | -0.00083 | 0.00992  | -0.00905 | 0.00144  | -0.00196 |
|     | 3PZ | 0.06165  | 0.03157  | 0.01097  | 0.24041  | -0.04912 | 0.04153  | 0.00067  | 0.11215  |
|     | 4XX | 0.00061  | 0.00013  | 0.00038  | 0.00036  | -0.00089 | -0.00017 | 0.00025  | -0.0002  |
|     | 4YY | 0.00051  | -0.00038 | 0.00173  | -0.00098 | -0.0006  | -0.00028 | -0.00016 | -0.00005 |
|     | 4ZZ | -0.00107 | 0.00078  | -0.00061 | 0.00062  | 0.00173  | -0.00005 | -0.00028 | -0.00073 |
|     | 4XY | 0.00091  | -0.00078 | -0.00025 | -0.0009  | -0.00203 | -0.00035 | -0.00001 | 0.00014  |
|     | 4XZ | -0.00742 | 0.00243  | -0.00395 | -0.00149 | 0.01316  | -0.00304 | -0.00055 | 0.00155  |
|     | 4YZ | 0.00146  | 0.00583  | -0.00256 | 0.01066  | 0.00495  | -0.00005 | -0.00051 | -0.00002 |
| 35C | 1S  | 0.00075  | 0.00176  | 0.00257  | -0.00084 | -0.00022 | 0.00025  | 0.0002   | 0.00241  |
|     | 2S  | -0.00214 | -0.00496 | -0.00789 | 0.00392  | 0.00051  | -0.00039 | -0.00011 | -0.00609 |
|     | 2PX | 0.00281  | -0.06972 | -0.09145 | 0.03149  | -0.01911 | -0.04961 | -0.06612 | 0.00317  |
|     | 2PY | 0.04615  | -0.03934 | 0.01019  | -0.08813 | -0.04316 | -0.10166 | -0.13566 | 0.02096  |
|     | 2PZ | 0.00597  | -0.00808 | 0.00762  | 0.08971  | -0.04846 | -0.15504 | -0.22512 | 0.03446  |
|     | 3S  | -0.00156 | -0.0067  | -0.0097  | -0.00332 | -0.00044 | 0.00094  | -0.00371 | 0.01292  |
|     | 3PX | 0.00554  | -0.02236 | -0.02208 | 0.00352  | -0.01222 | -0.03518 | -0.04804 | 0.00898  |
|     | 3PY | 0.01864  | -0.01863 | 0.00019  | -0.02677 | -0.03038 | -0.07446 | -0.0995  | 0.01271  |
|     | 3PZ | 0.0075   | -0.01278 | -0.00141 | 0.04262  | -0.02892 | -0.1     | -0.17292 | 0.03289  |
|     | 4XX | 0.00154  | 0.00156  | 0.00452  | -0.00606 | -0.00132 | -0.00234 | -0.00108 | 0.00076  |

|     |     |          |          |          |          |          |          |          |          |
|-----|-----|----------|----------|----------|----------|----------|----------|----------|----------|
|     | 4YY | -0.0009  | 0.00014  | -0.00122 | 0.00356  | 0.00123  | 0.00219  | 0.00048  | 0.00016  |
|     | 4ZZ | -0.00032 | -0.00072 | -0.00164 | 0.00097  | 0.00008  | 0.00032  | 0.00072  | -0.00015 |
|     | 4XY | 0.00047  | -0.0037  | -0.00484 | 0.00075  | -0.00172 | -0.00295 | -0.00109 | -0.00066 |
|     | 4XZ | 0.00079  | -0.00067 | 0.00075  | 0.0033   | -0.00083 | -0.00276 | -0.00317 | 0.00019  |
|     | 4YZ | -0.00005 | 0.00177  | 0.00237  | -0.00316 | 0.00045  | 0.00123  | 0.001    | 0.00011  |
| 36C | 1S  | -0.00159 | 0.00263  | 0.0007   | 0.00123  | -0.00329 | -0.00574 | 0.00268  | -0.0027  |
|     | 2S  | 0.0028   | -0.00435 | -0.00041 | -0.00071 | 0.00737  | 0.01114  | -0.00545 | 0.00517  |
|     | 2PX | 0.03045  | 0.01263  | 0.07368  | -0.05068 | 0.00762  | -0.00071 | -0.03802 | 0.01302  |
|     | 2PY | -0.01527 | -0.00994 | -0.02565 | 0.12221  | -0.0176  | -0.05942 | -0.05162 | -0.00249 |
|     | 2PZ | 0.03597  | -0.0519  | -0.02029 | -0.02021 | -0.05103 | -0.10888 | -0.08234 | 0.00348  |
|     | 3S  | 0.01006  | -0.01528 | -0.00369 | -0.02195 | 0.01691  | 0.0435   | -0.02429 | 0.02317  |
|     | 3PX | 0.01602  | -0.00788 | 0.01823  | -0.02951 | 0.00524  | 0.00954  | -0.03328 | 0.01432  |
|     | 3PY | -0.00276 | -0.0061  | -0.00923 | 0.04767  | -0.02302 | -0.05815 | -0.02646 | -0.02641 |
|     | 3PZ | 0.01677  | -0.02375 | -0.00687 | 0.00464  | -0.02744 | -0.06789 | -0.06414 | 0.01412  |
|     | 4XX | 0.00163  | 0.00038  | 0.00273  | -0.0045  | -0.00067 | 0.00064  | 0.00438  | -0.00084 |
|     | 4YY | -0.00053 | -0.00126 | -0.00222 | 0.00462  | -0.00162 | -0.00585 | -0.00956 | 0.0011   |
|     | 4ZZ | -0.00122 | 0.00071  | -0.00125 | -0.00093 | 0.0012   | 0.00363  | 0.00591  | -0.00121 |
|     | 4XY | 0.00121  | -0.00369 | -0.00393 | -0.00247 | -0.0019  | -0.0019  | 0.00274  | -0.00071 |
|     | 4XZ | -0.00012 | 0.00046  | 0.00115  | 0.0038   | 0.00147  | 0.00406  | 0.00824  | -0.0018  |
|     | 4YZ | 0.00069  | 0.00101  | 0.00257  | -0.00108 | -0.00089 | -0.00361 | -0.00717 | 0.00148  |
| 37C | 1S  | 0.00271  | -0.00536 | -0.00346 | 0.00114  | 0.00625  | 0.01172  | -0.00572 | 0.00603  |
|     | 2S  | -0.0049  | 0.01084  | 0.008    | -0.00699 | -0.0139  | -0.02432 | 0.01234  | -0.01422 |
|     | 2PX | -0.02165 | -0.02945 | -0.08015 | 0.04802  | -0.03627 | -0.04343 | 0.06689  | -0.02674 |
|     | 2PY | 0.04119  | -0.02211 | 0.02755  | -0.08941 | -0.01659 | 0.01187  | 0.09625  | -0.00691 |
|     | 2PZ | 0.02015  | -0.03676 | -0.00905 | 0.06499  | 0.01345  | 0.05519  | 0.1416   | -0.03206 |
|     | 3S  | -0.01475 | 0.02353  | 0.00587  | 0.01241  | -0.02731 | -0.07639 | 0.03111  | -0.00846 |
|     | 3PX | 0.00003  | -0.02006 | -0.0294  | 0.00012  | -0.00068 | 0.01571  | 0.02136  | 0.0283   |
|     | 3PY | 0.01447  | -0.01232 | 0.00283  | -0.00754 | -0.00285 | 0.01603  | 0.06915  | 0.03221  |
|     | 3PZ | 0.01454  | -0.02399 | -0.00538 | 0.01866  | -0.0007  | 0.02157  | 0.12036  | -0.06443 |
|     | 4XX | 0.00137  | -0.00114 | 0.00055  | -0.00787 | 0.00176  | 0.00479  | 0.00283  | 0.00173  |
|     | 4YY | -0.00005 | -0.00121 | -0.00148 | 0.00909  | 0.00065  | 0.00181  | 0.00385  | -0.00044 |
|     | 4ZZ | -0.00136 | 0.00119  | -0.00074 | 0.0014   | -0.00092 | -0.00447 | -0.00819 | 0.00033  |
|     | 4XY | 0.00071  | -0.00141 | -0.00162 | -0.00307 | -0.00003 | 0.00326  | 0.00688  | -0.00065 |
|     | 4XZ | -0.00082 | 0.00125  | 0.00084  | 0.00286  | 0.00306  | 0.00749  | 0.00693  | -0.0005  |
|     | 4YZ | 0.0017   | -0.00111 | 0.00128  | -0.00507 | -0.0007  | -0.00067 | 0.00056  | -0.00036 |
| 38C | 1S  | 0.00089  | 0.00518  | 0.00889  | 0.00385  | -0.00032 | 0.00108  | 0.0019   | 0.00318  |
|     | 2S  | -0.0031  | -0.0115  | -0.02135 | -0.00673 | -0.00028 | -0.00154 | -0.00624 | 0.00587  |
|     | 2PX | 0.00612  | -0.02167 | -0.00279 | -0.0627  | 0.02561  | 0.0562   | 0.05224  | -0.00591 |
|     | 2PY | 0.02465  | -0.01308 | 0.02083  | 0.12505  | 0.05485  | 0.13776  | 0.12135  | 0.00023  |
|     | 2PZ | 0.03415  | -0.05022 | -0.01856 | -0.06121 | 0.01114  | 0.12041  | 0.23263  | -0.01593 |
|     | 3S  | 0.00253  | -0.01327 | -0.01188 | -0.04448 | 0.01143  | -0.01264 | 0.00652  | -0.11052 |
|     | 3PX | 0.00268  | -0.01791 | -0.01874 | -0.00813 | 0.01457  | 0.03266  | 0.04058  | 0.04572  |
|     | 3PY | 0.01265  | -0.00245 | 0.01576  | 0.02042  | 0.03156  | 0.06537  | 0.06987  | -0.00618 |
|     | 3PZ | 0.01705  | -0.02488 | -0.00509 | -0.01594 | 0.00644  | 0.09256  | 0.15303  | -0.02501 |

|     |     |          |          |          |          |          |          |          |          |
|-----|-----|----------|----------|----------|----------|----------|----------|----------|----------|
|     | 4XX | -0.00075 | 0.00315  | 0.00349  | -0.00837 | -0.0009  | -0.00173 | -0.00277 | 0.00242  |
|     | 4YY | 0.00113  | -0.00166 | -0.00052 | 0.00618  | 0.00174  | 0.00343  | 0.00134  | 0.00087  |
|     | 4ZZ | -0.00032 | -0.00039 | -0.00097 | 0.0014   | -0.00082 | -0.00118 | 0.0017   | -0.00051 |
|     | 4XY | -0.00178 | 0.00108  | -0.00167 | -0.00133 | -0.00249 | -0.00452 | -0.00161 | -0.00163 |
|     | 4XZ | 0.00054  | 0.00059  | 0.00149  | 0        | 0.00571  | 0.00922  | -0.01218 | 0.00505  |
|     | 4YZ | 0.00037  | 0.00041  | 0.00124  | -0.00166 | -0.00195 | -0.00299 | 0.00498  | -0.00286 |
| 39C | 1S  | -0.00362 | -0.00063 | -0.00752 | -0.0022  | -0.00643 | -0.01145 | 0.00555  | 0.00037  |
|     | 2S  | 0.00685  | 0.00377  | 0.01805  | 0.00533  | 0.01418  | 0.02378  | -0.01307 | 0.00066  |
|     | 2PX | 0.02719  | -0.06694 | -0.05    | 0.0446   | 0.01812  | 0.04309  | 0.02561  | -0.01869 |
|     | 2PY | 0.01674  | -0.02677 | -0.00513 | -0.11275 | -0.03359 | -0.02359 | 0.10114  | -0.0372  |
|     | 2PZ | 0.0243   | -0.02222 | 0.00631  | 0.0812   | 0.00833  | 0.05352  | 0.14056  | -0.0153  |
|     | 3S  | 0.01961  | -0.01419 | 0.01691  | 0.02354  | 0.02988  | 0.0755   | -0.02219 | 0.00195  |
|     | 3PX | -0.00142 | -0.01194 | -0.01078 | 0.02409  | -0.00523 | 0.00109  | 0.03119  | -0.02128 |
|     | 3PY | 0.01735  | -0.01584 | 0.00722  | -0.04984 | 0.00624  | 0.01105  | 0.0605   | -0.06889 |
|     | 3PZ | 0.01707  | -0.0251  | -0.01377 | 0.04119  | -0.00441 | 0.03091  | 0.11608  | 0.01224  |
|     | 4XX | -0.00063 | 0.00011  | -0.00063 | -0.00582 | -0.00036 | 0.00053  | 0.00381  | 0.0002   |
|     | 4YY | -0.00124 | 0.00135  | -0.00024 | 0.00412  | -0.00122 | -0.00539 | -0.00918 | 0.0008   |
|     | 4ZZ | 0.00139  | -0.0023  | -0.00109 | 0.00035  | 0.00011  | 0.00269  | 0.00663  | -0.0008  |
|     | 4XY | 0.00059  | -0.00141 | -0.00162 | -0.00377 | 0.00022  | 0.00127  | 0.00024  | -0.0002  |
|     | 4XZ | -0.0011  | 0.00234  | 0.00155  | 0.00287  | 0.00299  | 0.00688  | 0.00579  | 0.0001   |
|     | 4YZ | -0.00076 | 0.00118  | 0.00055  | -0.0014  | -0.0014  | -0.00513 | -0.00613 | 0.00026  |
| 40C | 1S  | 0.00235  | 0.00109  | 0.00557  | 0.00289  | 0.00323  | 0.00549  | -0.00241 | -0.00041 |
|     | 2S  | -0.00371 | -0.0035  | -0.0124  | -0.01009 | -0.00668 | -0.01065 | 0.00549  | 0.00002  |
|     | 2PX | -0.01122 | 0.05021  | 0.06019  | -0.02435 | -0.02144 | -0.04845 | -0.01899 | 0.0064   |
|     | 2PY | 0.00761  | -0.00609 | 0.00742  | 0.10917  | -0.00768 | -0.04072 | -0.06526 | 0.00488  |
|     | 2PZ | 0.03588  | -0.06497 | -0.03434 | -0.01931 | -0.0488  | -0.10664 | -0.09556 | 0.00273  |
|     | 3S  | -0.02148 | 0.00736  | -0.01683 | 0.00223  | -0.02222 | -0.04007 | 0.01388  | 0.0045   |
|     | 3PX | -0.01142 | 0.02244  | 0.01771  | -0.0039  | -0.02497 | -0.04838 | -0.00931 | 0.00885  |
|     | 3PY | 0.01007  | -0.01368 | -0.00121 | 0.02995  | -0.0138  | -0.03372 | -0.04402 | 0.01244  |
|     | 3PZ | 0.01715  | -0.02805 | -0.01002 | 0.0079   | -0.02445 | -0.0668  | -0.07316 | -0.00662 |
|     | 4XX | 0.00098  | 0.00091  | 0.00271  | -0.00616 | -0.00022 | 0.00165  | 0.00567  | -0.00136 |
|     | 4YY | -0.0018  | 0.00166  | -0.0005  | 0.00684  | 0.00277  | 0.00471  | 0.00165  | 0.00018  |
|     | 4ZZ | 0.001    | -0.00202 | -0.00116 | 0.0022   | -0.00151 | -0.00478 | -0.00792 | 0.00094  |
|     | 4XY | 0.00054  | -0.00263 | -0.00283 | -0.00392 | 0.00028  | 0.00296  | 0.00759  | -0.00226 |
|     | 4XZ | 0.00002  | 0.00057  | 0.00086  | 0.00416  | 0.00153  | 0.00502  | 0.00966  | -0.00143 |
|     | 4YZ | -0.00011 | 0.00158  | 0.00177  | -0.00535 | -0.00003 | 0.00012  | -0.00045 | 0.00017  |
| 41H | 1S  | 0.00912  | 0.0355   | 0.06331  | -0.04344 | 0.00028  | 0.00095  | 0.00037  | 0.00439  |
|     | 2S  | 0.01061  | 0.03891  | 0.07072  | -0.05189 | 0.0006   | 0.0011   | 0.00097  | 0.00998  |
|     | 3PX | 0.00052  | 0.00038  | 0.00133  | -0.00105 | -0.00038 | -0.00112 | -0.00181 | 0.00018  |
|     | 3PY | 0.00076  | -0.00141 | -0.00084 | -0.00075 | -0.00081 | -0.00225 | -0.0038  | 0.0007   |
|     | 3PZ | 0.00011  | -0.00034 | -0.00013 | 0.00179  | -0.00133 | -0.00408 | -0.00597 | 0.00093  |
| 42H | 1S  | 0.00638  | -0.02619 | -0.03643 | -0.0333  | -0.01511 | -0.01553 | 0.00588  | -0.00193 |
|     | 2S  | 0.00653  | -0.02775 | -0.03898 | -0.03924 | -0.02066 | -0.02326 | 0.01145  | -0.01069 |
|     | 3PX | 0.00073  | -0.00068 | 0.00002  | -0.00161 | -0.00039 | -0.00079 | -0.00069 | -0.00006 |

|     |     |          |          |          |          |          |          |          |          |
|-----|-----|----------|----------|----------|----------|----------|----------|----------|----------|
|     | 3PY | -0.00004 | -0.00087 | -0.0013  | 0.00139  | -0.00072 | -0.00161 | -0.00141 | 0.0002   |
|     | 3PZ | 0.00057  | -0.00044 | 0.00047  | 0.00051  | -0.00081 | -0.0023  | -0.00235 | 0.00012  |
| 43H | 1S  | -0.02345 | 0.00434  | -0.02468 | 0.09219  | 0.00526  | -0.00193 | 0.00326  | -0.00914 |
|     | 2S  | -0.02069 | 0.00392  | -0.02207 | 0.10828  | 0.01869  | 0.03101  | -0.01428 | 0.04636  |
|     | 3PX | 0.00012  | -0.00049 | -0.00066 | -0.00025 | -0.00033 | 0.00001  | 0.00099  | 0.00043  |
|     | 3PY | -0.00034 | -0.00049 | -0.00101 | 0.00186  | -0.00027 | 0.00013  | 0.0027   | -0.00096 |
|     | 3PZ | 0.001    | -0.00096 | 0.00027  | -0.00077 | 0.00012  | 0.0012   | 0.00351  | -0.00085 |
| 44H | 1S  | 0.01404  | -0.0339  | -0.02454 | -0.04738 | -0.00443 | -0.00119 | -0.00349 | -0.0088  |
|     | 2S  | 0.01251  | -0.03836 | -0.04762 | -0.04526 | -0.0243  | -0.02509 | 0.01243  | 0.04375  |
|     | 3PX | 0        | -0.00015 | -0.00042 | 0.00253  | 0.00013  | 0.00026  | 0.00177  | 0.00072  |
|     | 3PY | 0.00015  | 0.00001  | 0.00015  | -0.00076 | -0.00041 | 0.00005  | 0.00233  | -0.00102 |
|     | 3PZ | 0.00097  | -0.00157 | -0.00075 | 0.00037  | 0.0001   | 0.00129  | 0.0034   | -0.00053 |
| 45H | 1S  | -0.0088  | 0.00783  | -0.0018  | 0.08483  | 0.01386  | 0.01603  | -0.00394 | 0.00369  |
|     | 2S  | -0.00992 | 0.01305  | 0.00255  | 0.10067  | 0.01953  | 0.02345  | -0.00808 | 0.0017   |
|     | 3PX | -0.00023 | 0.0008   | 0.00093  | 0.00042  | -0.00019 | -0.00078 | -0.00069 | -0.00011 |
|     | 3PY | 0.00044  | -0.00055 | 0.00018  | -0.00095 | -0.00075 | -0.00166 | -0.00166 | 0.00012  |
|     | 3PZ | 0.00055  | -0.00102 | -0.00058 | 0.00147  | -0.00087 | -0.00232 | -0.00266 | 0.00023  |
| 46C | 1S  | -0.00082 | -0.00204 | -0.00549 | 0.00606  | 0.00043  | -0.00151 | -0.00138 | -0.00079 |
|     | 2S  | 0.00221  | 0.00443  | 0.01203  | -0.01258 | -0.00055 | 0.00294  | 0.0038   | 0.00106  |
|     | 2PX | -0.0109  | 0.02726  | 0.01008  | 0.06598  | -0.00777 | -0.00016 | -0.0083  | -0.00426 |
|     | 2PY | -0.04907 | 0.07159  | 0.0303   | -0.09125 | -0.03786 | -0.06925 | -0.00737 | -0.01177 |
|     | 2PZ | 0.06108  | -0.04839 | 0.02681  | -0.06834 | 0.13889  | 0.27327  | -0.18307 | 0.10869  |
|     | 3S  | -0.00935 | 0.02009  | 0.02609  | -0.05358 | -0.01198 | 0.0003   | -0.01387 | 0.0118   |
|     | 3PX | -0.00778 | 0.00469  | -0.00199 | 0.01402  | 0.001    | 0.00948  | 0.00485  | 0.01826  |
|     | 3PY | -0.01211 | 0.01582  | 0.00751  | -0.0023  | -0.01731 | -0.0132  | 0.00269  | -0.02352 |
|     | 3PZ | 0.0326   | -0.02807 | 0.01063  | -0.03186 | 0.08752  | 0.16706  | -0.11128 | 0.09678  |
|     | 4XX | -0.00166 | 0.00085  | -0.00085 | -0.00637 | -0.0009  | -0.00395 | -0.00626 | -0.0011  |
|     | 4YY | 0.00087  | -0.0001  | 0.0007   | 0.00518  | 0.00091  | 0.00405  | 0.00339  | 0.00592  |
|     | 4ZZ | 0.00018  | -0.00037 | -0.0004  | 0.00056  | -0.00019 | -0.00075 | 0.00196  | -0.00437 |
|     | 4XY | -0.00096 | 0.00527  | 0.00523  | -0.00008 | -0.00206 | -0.00377 | -0.00284 | 0.00131  |
|     | 4XZ | 0.00215  | -0.00001 | 0.00307  | 0.00058  | 0.00321  | -0.00118 | -0.01171 | -0.0068  |
|     | 4YZ | 0.00161  | -0.00088 | 0.00107  | -0.00048 | -0.00008 | -0.00247 | 0.00611  | -0.02009 |
| 47C | 1S  | 0.00495  | -0.01346 | -0.01253 | -0.00264 | 0.00171  | 0.0089   | 0.01226  | -0.00207 |
|     | 2S  | -0.01095 | 0.02818  | 0.02591  | 0.00322  | -0.00211 | -0.01708 | -0.02499 | 0.00374  |
|     | 2PX | 0.02109  | -0.04471 | -0.01661 | -0.01991 | 0.03101  | 0.03787  | 0.00334  | -0.02344 |
|     | 2PY | 0.00187  | -0.02858 | -0.035   | 0.06036  | -0.01223 | -0.01061 | 0.04192  | 0.05984  |
|     | 2PZ | 0.11276  | -0.07544 | 0.06164  | -0.03997 | 0.13181  | 0.10116  | -0.15967 | -0.30907 |
|     | 3S  | -0.02071 | 0.05548  | 0.044    | 0.0106   | -0.02199 | -0.06475 | -0.08701 | 0.01925  |
|     | 3PX | 0.00756  | -0.02036 | -0.01606 | 0.01002  | -0.00126 | 0.00578  | -0.033   | -0.01984 |
|     | 3PY | -0.01573 | 0.01036  | 0.00562  | 0.00637  | -0.01288 | -0.01298 | 0.02159  | 0.07735  |
|     | 3PZ | 0.05808  | -0.03468 | 0.04126  | -0.03184 | 0.07668  | 0.08251  | -0.13026 | -0.29357 |
|     | 4XX | -0.00016 | -0.00002 | 0.00046  | -0.00494 | 0.00024  | 0.00042  | 0.00168  | -0.00087 |
|     | 4YY | 0.00194  | -0.00267 | -0.00219 | 0.00519  | 0.00096  | 0.0005   | -0.00033 | 0.00093  |
|     | 4ZZ | -0.00079 | -0.0001  | -0.00131 | 0.00016  | -0.00109 | 0.00009  | 0.00139  | -0.00022 |

|     |     |          |          |          |          |          |          |          |          |
|-----|-----|----------|----------|----------|----------|----------|----------|----------|----------|
|     | 4XY | -0.00288 | 0.00303  | 0.0011   | -0.00129 | -0.00114 | 0.0004   | -0.00103 | 0.00156  |
|     | 4XZ | 0.00501  | -0.00238 | 0.00379  | -0.00112 | 0.00011  | -0.01004 | 0.00313  | -0.01117 |
|     | 4YZ | -0.00237 | 0.00152  | -0.00139 | 0.00283  | -0.00491 | -0.00493 | 0.00458  | -0.00425 |
| 48H | 1S  | 0.01319  | -0.01924 | -0.01494 | 0.04747  | 0.00155  | -0.00749 | -0.00007 | -0.00045 |
|     | 2S  | 0.03044  | -0.05126 | -0.0488  | 0.06229  | 0.00739  | 0.01509  | 0.03108  | -0.03395 |
|     | 3PX | 0.00053  | -0.00095 | -0.00038 | 0.00019  | 0.00049  | 0.00015  | -0.00086 | -0.00067 |
|     | 3PY | -0.00034 | -0.00052 | -0.00172 | -0.00091 | -0.00084 | -0.00034 | 0.0012   | 0.00212  |
|     | 3PZ | 0.00228  | -0.00135 | 0.00183  | -0.00133 | 0.00298  | 0.0026   | -0.00388 | -0.0092  |
| 49C | 1S  | -0.00635 | 0.00633  | 0.0062   | 0.00176  | -0.00209 | -0.00419 | -0.00179 | 0.00053  |
|     | 2S  | 0.01444  | -0.0149  | -0.01657 | -0.00169 | 0.00265  | 0.00759  | 0.00184  | -0.00221 |
|     | 2PX | 0.00828  | 0.00419  | -0.00482 | 0.03529  | -0.01301 | -0.02604 | -0.00641 | -0.00132 |
|     | 2PY | -0.07207 | 0.03971  | 0.00342  | -0.0315  | -0.01464 | 0.02378  | 0.00084  | 0.02671  |
|     | 2PZ | 0.20873  | -0.12041 | 0.13524  | -0.07138 | 0.12053  | -0.12191 | 0.01606  | -0.16222 |
|     | 3S  | 0.01338  | -0.00727 | 0.00055  | -0.03887 | 0.02229  | 0.03395  | 0.03515  | 0.01057  |
|     | 3PX | 0.00317  | 0.00182  | -0.00495 | 0.0127   | -0.01021 | -0.02045 | -0.03569 | 0.00236  |
|     | 3PY | -0.01383 | 0.00622  | -0.00814 | 0.00266  | -0.00294 | 0.02489  | 0.00836  | 0.00144  |
|     | 3PZ | 0.11828  | -0.07225 | 0.07216  | -0.03745 | 0.08551  | -0.08917 | 0.02198  | -0.07953 |
|     | 4XX | -0.00131 | 0.00245  | 0.00214  | -0.0006  | 0.00055  | -0.00163 | -0.00332 | 0.00096  |
|     | 4YY | -0.00014 | -0.00092 | -0.00006 | -0.00036 | 0.0018   | -0.00311 | 0.00627  | 0.00838  |
|     | 4ZZ | -0.00137 | 0.00117  | 0.00032  | 0.00021  | -0.00295 | 0.00363  | -0.00349 | -0.00862 |
|     | 4XY | -0.00331 | 0.00204  | -0.00012 | -0.00425 | -0.00005 | 0.00154  | 0.00075  | -0.00342 |
|     | 4XZ | 0.0039   | -0.00147 | 0.00255  | 0.00049  | -0.00454 | -0.01028 | 0.01196  | 0.01941  |
|     | 4YZ | -0.00127 | 0.00109  | -0.0013  | 0.00264  | -0.01061 | 0.01143  | -0.00787 | -0.02467 |
| 50O | 1S  | 0.00838  | -0.00576 | -0.01085 | 0.00778  | -0.00135 | -0.00175 | -0.0017  | 0.00028  |
|     | 2S  | -0.01747 | 0.01326  | 0.02415  | -0.01561 | 0.00125  | 0.00305  | 0.00227  | 0.00143  |
|     | 2PX | -0.01892 | 0.03159  | 0.04507  | -0.00634 | 0.00997  | -0.01615 | -0.06264 | -0.00688 |
|     | 2PY | 0.01718  | -0.00111 | -0.04946 | 0.08276  | -0.03809 | 0.031    | -0.06786 | -0.0618  |
|     | 2PZ | 0.19104  | -0.1144  | 0.10785  | -0.05869 | 0.16991  | -0.25779 | 0.16369  | 0.32987  |
|     | 3S  | -0.03131 | 0.01701  | 0.04143  | -0.03071 | 0.0121   | 0.01132  | 0.01635  | -0.01199 |
|     | 3PX | -0.01278 | 0.02194  | 0.02924  | -0.00545 | 0.00705  | -0.01128 | -0.0453  | -0.00181 |
|     | 3PY | 0.00934  | -0.00074 | -0.02943 | 0.05139  | -0.02332 | 0.0229   | -0.04769 | -0.05451 |
|     | 3PZ | 0.11802  | -0.07081 | 0.06713  | -0.03755 | 0.11464  | -0.17752 | 0.12247  | 0.27788  |
|     | 4XX | 0.00047  | -0.00074 | -0.00158 | -0.00027 | -0.00066 | 0.00029  | 0.00114  | 0.00085  |
|     | 4YY | -0.001   | 0.00139  | -0.00381 | 0.00462  | -0.00354 | 0.00248  | -0.00508 | -0.00229 |
|     | 4ZZ | 0.00361  | -0.00176 | 0.00282  | -0.00135 | 0.00227  | -0.00425 | 0.00181  | 0.0033   |
|     | 4XY | -0.00097 | 0.00107  | 0.00233  | -0.00172 | 0.00116  | -0.00179 | -0.00147 | 0.00049  |
|     | 4XZ | -0.00518 | 0.00314  | -0.00253 | 0.00182  | -0.00477 | 0.00426  | -0.00205 | -0.00294 |
|     | 4YZ | 0.01212  | -0.0069  | 0.00667  | -0.00275 | 0.00824  | -0.01277 | 0.00674  | 0.00804  |
| 51C | 1S  | -0.00317 | 0.00413  | 0.00235  | -0.00815 | -0.00217 | -0.00741 | -0.007   | -0.00023 |
|     | 2S  | 0.00639  | -0.00845 | -0.00451 | 0.01658  | 0.00475  | 0.01566  | 0.01664  | 0.00051  |
|     | 2PX | -0.03027 | -0.05416 | -0.11483 | -0.02275 | -0.01133 | -0.03198 | -0.04374 | -0.00037 |
|     | 2PY | 0.0271   | -0.05429 | -0.03664 | 0.09563  | 0.0022   | 0.00299  | 0.05758  | -0.04008 |
|     | 2PZ | 0.03554  | -0.03505 | 0.00561  | -0.01034 | 0.09337  | 0.19261  | -0.16674 | 0.29012  |
|     | 3S  | 0.01737  | -0.02318 | -0.01564 | 0.05337  | 0.00906  | 0.04465  | 0.02528  | -0.00979 |



|     |     |          |          |          |          |          |          |          |          |
|-----|-----|----------|----------|----------|----------|----------|----------|----------|----------|
|     | 3PX | -0.0081  | -0.01814 | -0.04179 | -0.00346 | -0.00455 | -0.00969 | -0.0199  | -0.00449 |
|     | 3PY | 0.00919  | -0.01767 | -0.00977 | 0.04891  | -0.00152 | -0.00731 | 0.0308   | -0.04374 |
|     | 3PZ | 0.0227   | -0.02029 | 0.00695  | -0.00652 | 0.0631   | 0.12229  | -0.12416 | 0.25509  |
|     | 4XX | -0.00168 | 0.00133  | -0.00037 | -0.00483 | -0.00073 | -0.0021  | -0.00239 | 0.00018  |
|     | 4YY | 0.00028  | 0.00047  | 0.00101  | 0.00241  | -0.00106 | -0.00197 | 0.00252  | -0.00194 |
|     | 4ZZ | 0.00031  | -0.00026 | 0.0003   | -0.00077 | 0.00133  | 0.00258  | -0.00204 | 0.00167  |
|     | 4XY | 0.00011  | 0.0041   | 0.00529  | 0.00101  | 0.00003  | 0.00153  | 0.00145  | 0.00011  |
|     | 4XZ | 0.00027  | 0.00073  | 0.00129  | 0.00002  | -0.0004  | -0.00273 | 0.00094  | -0.00276 |
|     | 4YZ | 0.00274  | -0.00217 | 0.00114  | -0.00162 | 0.00557  | 0.01089  | -0.00763 | 0.00535  |
| 52H | 1S  | -0.0227  | -0.02288 | -0.06087 | -0.03453 | -0.00872 | -0.02381 | -0.02499 | -0.00069 |
|     | 2S  | -0.02565 | -0.01568 | -0.04418 | -0.04848 | -0.00619 | -0.03121 | -0.02232 | 0.00794  |
|     | 3PX | 0.00075  | 0.00028  | 0.00168  | 0.00073  | 0.00048  | 0.00088  | 0.00122  | 0.00052  |
|     | 3PY | -0.00009 | -0.00135 | -0.00176 | 0.00098  | -0.00015 | -0.00024 | 0.00139  | -0.00097 |
|     | 3PZ | 0.00114  | -0.0011  | 0.0002   | -0.00067 | 0.00255  | 0.00328  | -0.00358 | 0.00823  |
| 53H | 1S  | 0.00332  | 0.05103  | 0.07192  | -0.01529 | 0.00083  | 0.00983  | 0.01366  | -0.00174 |
|     | 2S  | -0.00111 | 0.05548  | 0.07067  | -0.01178 | -0.00253 | -0.00619 | -0.00406 | -0.00963 |
|     | 3PX | -0.00011 | 0.00102  | 0.00125  | -0.00126 | -0.00005 | 0.00019  | 0.00083  | -0.00033 |
|     | 3PY | 0.00063  | 0.00077  | 0.00176  | 0.0013   | -0.00006 | -0.00022 | 0.00112  | -0.00123 |
|     | 3PZ | 0.00058  | -0.00031 | 0.00043  | -0.00001 | 0.00206  | 0.0047   | -0.00407 | 0.00823  |

### 3.3.2 Combined coefficients and computational details of HFV index (F) of M1b

**Table S7.** Combined coefficients  $|c_{ki}|/|c_{kj}|$  after normalization of the  $i$  and  $j$  atoms in the  $k_{th}$  occupied  $\pi$ -type molecular orbital of **M1b**

| $i/j \backslash k$ | 83     | 84     | 85     | 89     | 92     | 93     | 97     | 99     |
|--------------------|--------|--------|--------|--------|--------|--------|--------|--------|
| 46                 | 0.1164 | 0.1300 | 0.0727 | 0.1792 | 0.2131 | 0.4420 | 0.2833 | 0.1739 |
| 47                 | 0.1761 | 0.1577 | 0.1378 | 0.1017 | 0.1984 | 0.2064 | 0.3058 | 0.5049 |
| 49                 | 0.3358 | 0.1942 | 0.2124 | 0.1243 | 0.1901 | 0.2196 | 0.0792 | 0.2140 |
| 51                 | 0.0837 | 0.1238 | 0.1777 | 0.1512 | 0.1429 | 0.3178 | 0.2962 | 0.4497 |

**Table S8.** The calculation details of HFV index (F) of **M1b**

| Active site   | $\pi$ Bond | $\pi$ -Type molecular orbitals with $\delta_k$ in parentheses | $\pi$ Bond order (P) | $\Sigma^P$ | HFV (F) |
|---------------|------------|---------------------------------------------------------------|----------------------|------------|---------|
| $\alpha$ (47) | 47-46      | 83 (1), 92 (1), 93 (1), 97 (1), 99 (-1)                       | 0.31 <sup>a</sup>    | 0.75       | 1.01    |
|               | 47-49      | 83 (1), 84 (1), 85 (1), 92 (1), 93 (-1), 99 (1)               | 0.44 <sup>b</sup>    |            |         |
| $\gamma$ (51) | 51-46      | 92 (1), 93 (1), 97 (1), 99 (1)                                | 0.67 <sup>c</sup>    | 0.67       | 1.09    |

a :  $P_{47-46} = 2 \times 0.1761 \times 0.1164 + 2 \times 0.1984 \times 0.2131 + 2 \times 0.2064 \times 0.4420 + 2 \times 0.3058 \times 0.2833 - 2 \times 0.5049 \times 0.1739 = 0.31$

b :  $P_{47-49} = 2 \times 0.1761 \times 0.3358 + 2 \times 0.1577 \times 0.1942 + 2 \times 0.1378 \times 0.2124 + 2 \times 0.1984 \times 0.1901 - 2 \times 0.2064 \times 0.2196 + 2 \times 0.5049 \times 0.2140 = 0.44$

c :  $P_{51-46} = 2 \times 0.1429 \times 0.2131 + 2 \times 0.3178 \times 0.4420 + 2 \times 0.2962 \times 0.2833 + 2 \times 0.4497 \times 0.1739 = 0.67$

### 3.4 The occupied $\pi$ -type molecular orbitals associated with the active sites of M1c

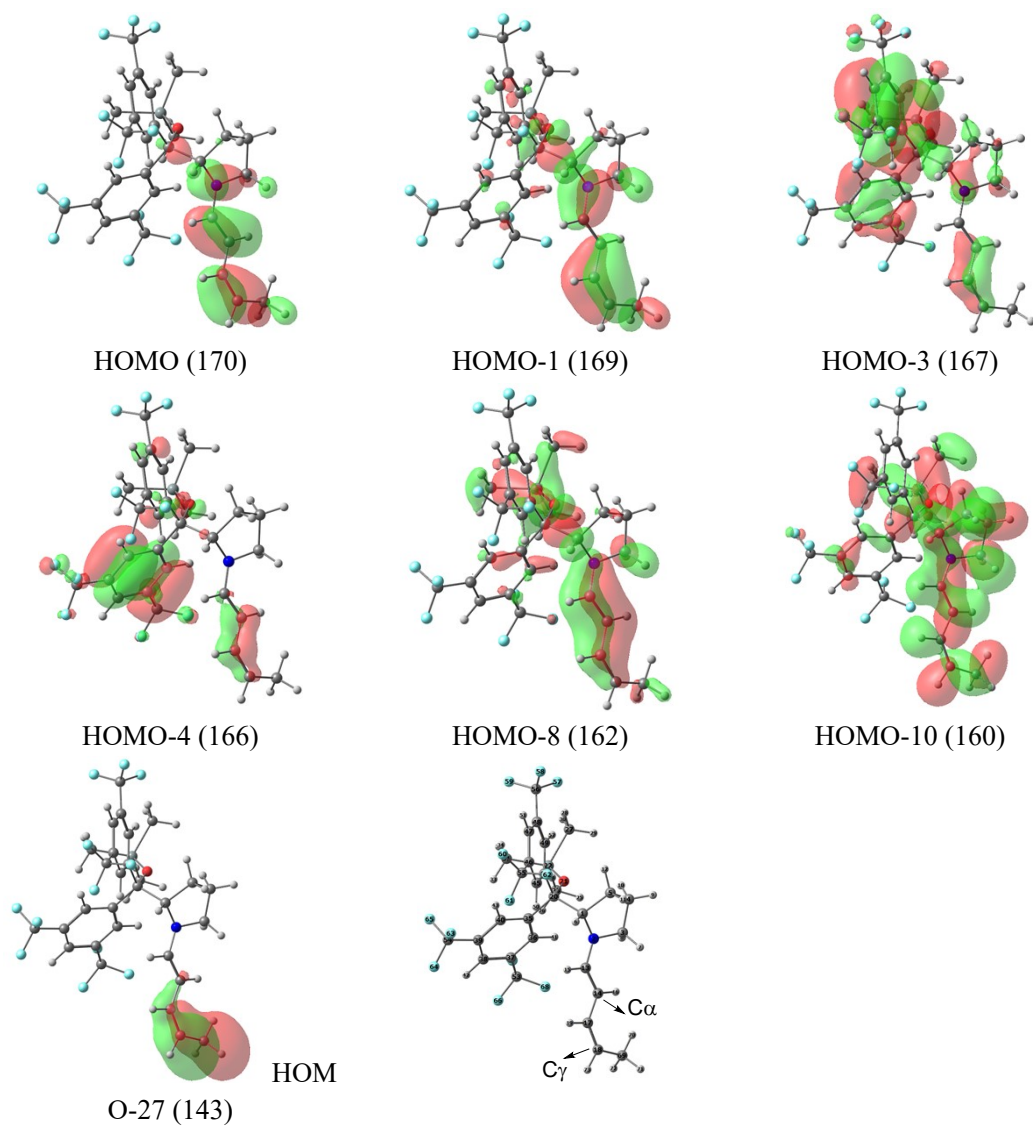

**Fig. S7.** The occupied  $\pi$ -type molecular orbitals associated with the active sites of M1c

### 3.4.1 Molecular orbital coefficients of M1c

|     |     | 143      | 160      | 162      | 166      | 167      | 169      | 170      |
|-----|-----|----------|----------|----------|----------|----------|----------|----------|
| 1C  | 1S  | 0.00023  | 0.00319  | -0.0006  | -0.00685 | 0.01686  | -0.00817 | -0.00482 |
|     | 2S  | -0.00028 | -0.00388 | 0.00224  | 0.01206  | -0.02975 | 0.01976  | 0.01421  |
|     | 2PX | -0.01477 | 0.00591  | -0.00033 | 0.02109  | -0.04711 | -0.00961 | -0.03144 |
|     | 2PY | 0.00146  | -0.01554 | -0.01708 | 0.01585  | -0.03896 | 0.00575  | 0.00307  |
|     | 2PZ | -0.00605 | 0.0927   | -0.12423 | -0.03848 | 0.07897  | -0.1227  | -0.02732 |
|     | 3S  | 0.00025  | -0.02991 | 0.00432  | 0.04498  | -0.1192  | 0.03915  | 0.02049  |
|     | 3PX | -0.00481 | -0.00971 | -0.00181 | 0.00806  | -0.00427 | -0.01734 | -0.02773 |
|     | 3PY | -0.00266 | -0.01188 | -0.01314 | 0.0108   | -0.00522 | -0.0047  | 0.01386  |
|     | 3PZ | -0.00155 | 0.06079  | -0.05347 | -0.02908 | 0.05347  | -0.04086 | 0.0242   |
|     | 4XX | 0.00085  | -0.00062 | 0.00041  | -0.00241 | 0.00404  | -0.00098 | -0.00036 |
|     | 4YY | -0.00084 | 0.00471  | -0.00465 | -0.00064 | 0.00083  | -0.00592 | -0.00434 |
|     | 4ZZ | 0.00014  | -0.00348 | 0.00474  | 0.0018   | -0.00276 | 0.00649  | 0.00427  |
|     | 4XY | 0.00066  | -0.00283 | 0.0003   | -0.00059 | 0.00133  | 0.00061  | 0.00166  |
|     | 4XZ | 0.00016  | -0.00335 | -0.00827 | 0.0008   | -0.00196 | -0.01526 | -0.01632 |
|     | 4YZ | -0.00017 | 0.00307  | -0.00617 | -0.00068 | -0.0013  | -0.00696 | -0.00661 |
|     | 2N  | 1S       | -0.00048 | -0.00065 | 0.00565  | 0.00296  | -0.00205 | 0.01187  |
| 2S  |     | 0.00138  | 0.00113  | -0.01046 | -0.00667 | 0.00124  | -0.02234 | -0.02115 |
| 2PX |     | 0.01673  | -0.01071 | 0.0244   | -0.02022 | 0.04878  | 0.05843  | 0.07636  |
| 2PY |     | -0.00755 | 0.03764  | 0.01474  | -0.01029 | 0.01677  | -0.00226 | -0.00589 |
| 2PZ |     | -0.00666 | 0.10893  | 0.14456  | -0.01459 | 0.05804  | 0.30219  | 0.31767  |
| 3S  |     | 0.00007  | 0.01201  | -0.03039 | -0.01956 | 0.03666  | -0.06558 | -0.05749 |
| 3PX |     | 0.00785  | -0.01086 | 0.01857  | -0.01531 | 0.04725  | 0.03792  | 0.05582  |
| 3PY |     | -0.00426 | 0.0123   | 0.01501  | -0.0007  | 0.00753  | 0.00138  | -0.01328 |
| 3PZ |     | -0.00306 | 0.07534  | 0.1016   | -0.01351 | 0.04446  | 0.24195  | 0.28284  |
| 4XX |     | 0.00033  | -0.00058 | -0.0034  | -0.00109 | 0.0009   | -0.00262 | 0.00235  |
| 4YY |     | -0.00029 | -0.00141 | -0.00182 | 0.00003  | -0.00236 | -0.00149 | 0.0008   |
| 4ZZ |     | 0.00016  | 0.00106  | 0.00625  | 0.00159  | -0.00097 | 0.00736  | 0.0004   |
| 4XY |     | 0.00075  | 0.00033  | 0.0009   | 0.00036  | -0.00011 | 0.00161  | -0.00092 |
| 4XZ |     | -0.00041 | 0.00151  | -0.00621 | -0.002   | 0.00349  | -0.00296 | 0.00748  |
| 4YZ |     | 0.00042  | 0.00772  | 0.00755  | -0.00018 | 0.00098  | 0.00496  | -0.00425 |
| 3C  |     | 1S       | 0.00086  | -0.00106 | 0.003    | -0.00034 | 0.00332  | -0.00378 |
|     | 2S  | -0.0016  | 0.0029   | -0.00531 | 0.00132  | -0.00815 | 0.00889  | 0.01993  |
|     | 2PX | -0.00713 | -0.02042 | -0.00052 | 0.0101   | -0.03626 | 0.00077  | -0.00425 |
|     | 2PY | 0.00004  | -0.05349 | -0.02693 | 0.00654  | -0.01237 | -0.00052 | 0.02327  |
|     | 2PZ | -0.0143  | -0.14398 | -0.1135  | -0.00358 | -0.02083 | -0.0869  | -0.02262 |
|     | 3S  | -0.00429 | -0.00688 | -0.01607 | 0.00449  | -0.01928 | 0.01862  | 0.05125  |
|     | 3PX | -0.00282 | -0.00826 | 0.00494  | 0.00696  | -0.02181 | 0.01043  | 0.00855  |
|     | 3PY | -0.00013 | -0.03706 | -0.0022  | 0.00935  | -0.00904 | 0.00253  | 0.00112  |
|     | 3PZ | -0.00762 | -0.06409 | -0.05473 | -0.00366 | -0.00517 | -0.02566 | 0.03799  |
|     | 4XX | -0.00013 | 0.00337  | 0.00266  | -0.00005 | 0.00116  | 0.00169  | 0.00148  |
|     | 4YY | 0.00036  | 0.00136  | 0.00296  | 0.0007   | -0.00058 | 0.00511  | 0.00388  |
|     | 4ZZ | -0.00002 | -0.00541 | -0.00423 | -0.00002 | -0.00049 | -0.00649 | -0.00635 |

|    |     |          |          |          |          |          |          |          |
|----|-----|----------|----------|----------|----------|----------|----------|----------|
|    | 4XY | 0.0006   | 0.00213  | 0.00182  | -0.00104 | 0.00315  | 0.00396  | 0.00574  |
|    | 4XZ | 0.00054  | 0.01251  | 0.00586  | -0.00074 | 0.00322  | 0.00653  | 0.0064   |
|    | 4YZ | -0.00003 | 0.00429  | 0.00737  | -0.00045 | 0.0028   | 0.01258  | 0.01287  |
| 4C | 1S  | 0.00116  | 0.00031  | -0.00103 | -0.00169 | 0.00152  | 0.00208  | 0.0048   |
|    | 2S  | -0.00257 | 0.0008   | 0.00557  | 0.00509  | -0.00613 | 0.00214  | -0.00438 |
|    | 2PX | 0.00238  | 0.00702  | -0.01104 | -0.00646 | 0.03061  | -0.00582 | 0.00896  |
|    | 2PY | -0.0124  | 0.02854  | 0.00949  | 0.00395  | 0.00057  | -0.00834 | -0.01807 |
|    | 2PZ | 0.00387  | 0.17424  | 0.01975  | -0.00953 | 0.02292  | 0.00006  | -0.00621 |
|    | 3S  | -0.00367 | -0.00952 | -0.00535 | 0.00433  | -0.00037 | -0.03497 | -0.05847 |
|    | 3PX | 0.00053  | 0.00289  | -0.01492 | -0.00413 | 0.01784  | -0.01014 | 0.00736  |
|    | 3PY | -0.00513 | 0.01818  | -0.01226 | -0.00594 | 0.00937  | -0.03422 | -0.03875 |
|    | 3PZ | 0.00166  | 0.07851  | 0.00556  | -0.00601 | 0.01257  | -0.00475 | -0.00648 |
|    | 4XX | -0.00014 | 0.00372  | 0.00134  | 0.00022  | -0.00135 | 0.00205  | 0.00088  |
|    | 4YY | -0.00012 | 0.00416  | -0.00014 | -0.00035 | 0.00116  | -0.00074 | -0.00006 |
|    | 4ZZ | 0.00041  | -0.00814 | -0.00097 | 0.00035  | -0.00058 | -0.00016 | 0.00019  |
|    | 4XY | -0.00004 | 0.00305  | 0.0002   | -0.0004  | 0.00145  | -0.0007  | -0.00136 |
|    | 4XZ | 0.0006   | 0.00412  | 0.00443  | 0.00016  | 0.00092  | 0.00363  | 0.00151  |
|    | 4YZ | -0.00032 | -0.01019 | -0.00057 | 0.00062  | -0.00076 | 0.00042  | 0.00178  |
| 5C | 1S  | 0.00047  | -0.00615 | -0.00008 | -0.00006 | 0.00361  | 0.00332  | 0.00589  |
|    | 2S  | -0.00092 | 0.01411  | -0.00091 | 0.00056  | -0.00854 | -0.00943 | -0.01755 |
|    | 2PX | 0.00819  | -0.02232 | -0.00883 | 0.00175  | -0.04629 | 0.02997  | 0.02282  |
|    | 2PY | -0.00287 | -0.03491 | -0.02616 | 0.0004   | -0.00459 | -0.04155 | -0.03238 |
|    | 2PZ | 0.0164   | -0.12368 | 0.04458  | 0.01054  | -0.00265 | 0.03045  | 0.01628  |
|    | 3S  | -0.00385 | 0.02558  | 0.01057  | 0.00139  | -0.01673 | 0.00538  | -0.00177 |
|    | 3PX | 0.00417  | -0.00925 | -0.00957 | -0.0031  | -0.03868 | 0.00473  | -0.01483 |
|    | 3PY | -0.00319 | -0.02426 | -0.02476 | -0.00209 | 0.01491  | -0.04873 | -0.04009 |
|    | 3PZ | 0.00809  | -0.06271 | 0.02611  | 0.00877  | -0.00737 | 0.02018  | 0.01513  |
|    | 4XX | -0.00035 | 0.0045   | -0.00103 | -0.00086 | 0.00043  | 0.00089  | 0.00269  |
|    | 4YY | -0.00045 | 0.00381  | -0.00257 | -0.00006 | 0.00103  | -0.00334 | -0.0025  |
|    | 4ZZ | 0.00083  | -0.00934 | 0.00308  | 0.00106  | -0.00131 | 0.00243  | -0.00017 |
|    | 4XY | -0.00009 | 0.00019  | 0.00229  | 0.00065  | -0.00011 | 0.00083  | -0.00136 |
|    | 4XZ | -0.00009 | -0.00384 | 0.00093  | 0.0006   | -0.00039 | -0.00052 | -0.00177 |
|    | 4YZ | 0.00018  | -0.00382 | -0.00199 | -0.00023 | 0.00031  | -0.00139 | -0.00015 |
| 6H | 1S  | -0.00344 | 0.02671  | -0.06597 | 0.00087  | -0.01164 | -0.06024 | -0.04064 |
|    | 2S  | -0.00186 | 0.0282   | -0.06274 | -0.00503 | 0.0016   | -0.08196 | -0.1032  |
|    | 3PX | -0.00021 | -0.00066 | -0.00006 | 0.00004  | 0.00019  | -0.001   | -0.00095 |
|    | 3PY | 0.00015  | -0.00103 | 0.00208  | -0.00016 | -0.00016 | 0.00161  | 0.0006   |
|    | 3PZ | -0.00001 | 0.00062  | -0.00046 | -0.00057 | 0.00179  | -0.00109 | -0.00045 |
| 7H | 1S  | -0.00658 | -0.09505 | -0.07577 | -0.00223 | -0.01153 | -0.07433 | -0.04723 |
|    | 2S  | -0.00257 | -0.10013 | -0.05911 | 0.00674  | -0.01955 | -0.10321 | -0.14656 |
|    | 3PX | -0.00029 | -0.00144 | -0.00193 | -0.0001  | -0.00057 | -0.00128 | -0.00009 |
|    | 3PY | 0.00004  | -0.00121 | 0.00045  | 0.00037  | -0.00029 | 0.00072  | 0.00009  |
|    | 3PZ | 0.00009  | 0.00115  | 0.00135  | 0.00014  | -0.00014 | 0.00112  | 0.00036  |
| 8H | 1S  | 0.00828  | 0.09994  | 0.06513  | -0.00679 | 0.03432  | 0.06609  | 0.05015  |

|     |     |          |          |          |          |          |          |          |
|-----|-----|----------|----------|----------|----------|----------|----------|----------|
|     | 2S  | 0.00738  | 0.09684  | 0.07037  | -0.0098  | 0.04404  | 0.08924  | 0.10382  |
|     | 3PX | 0.00017  | 0.00257  | 0.00213  | 0.00011  | 0.00016  | 0.00179  | 0.00051  |
|     | 3PY | 0.00014  | 0.00083  | -0.00023 | -0.0001  | 0.00028  | -0.00027 | 0.0001   |
|     | 3PZ | 0.00006  | 0.00046  | -0.00003 | -0.00023 | 0.00058  | 0.00025  | 0.00053  |
| 9H  | 1S  | 0.00679  | 0.072    | 0.00526  | -0.00552 | 0.0115   | 0.00162  | -0.00051 |
|     | 2S  | 0.00643  | 0.07692  | -0.00044 | -0.00929 | 0.01586  | -0.00825 | -0.01106 |
|     | 3PX | 0.00009  | -0.00013 | 0.00047  | -0.00003 | 0.00052  | 0.00077  | 0.0009   |
|     | 3PY | 0.00009  | 0.00292  | 0.00055  | -0.00005 | 0.00037  | 0.00012  | -0.0002  |
|     | 3PZ | -0.00016 | 0.00097  | 0.00043  | 0.00012  | -0.00008 | 0.00005  | -0.00039 |
| 10H | 1S  | -0.00028 | -0.12473 | -0.02008 | 0.00496  | -0.01012 | -0.00574 | 0.00643  |
|     | 2S  | 0.00049  | -0.11936 | -0.02812 | -0.00132 | -0.00123 | -0.01584 | 0.01001  |
|     | 3PX | -0.00003 | 0.00131  | -0.00066 | -0.00023 | 0.00083  | -0.00055 | -0.00001 |
|     | 3PY | -0.00023 | -0.00021 | -0.00049 | -0.0001  | 0.00029  | -0.00067 | -0.00068 |
|     | 3PZ | 0.00003  | -0.00303 | -0.0002  | 0.00031  | -0.00064 | 0.00032  | 0.00041  |
| 11H | 1S  | 0.01065  | -0.0947  | 0.03088  | 0.00939  | -0.01215 | 0.01999  | 0.0018   |
|     | 2S  | 0.00945  | -0.10281 | 0.03144  | 0.00938  | -0.00839 | 0.02493  | -0.00103 |
|     | 3PX | 0.00009  | -0.00036 | -0.0002  | 0.00016  | -0.00097 | 0.00048  | 0.00035  |
|     | 3PY | -0.00013 | -0.00034 | -0.0011  | -0.00007 | -0.00014 | -0.00113 | -0.00071 |
|     | 3PZ | -0.00027 | 0.00196  | -0.00064 | -0.00018 | 0.00047  | -0.00031 | 0.00018  |
| 12H | 1S  | 0.00047  | 0.03627  | -0.0156  | -0.00455 | -0.01604 | 0.00888  | 0.0148   |
|     | 2S  | 0.00055  | 0.03741  | -0.01565 | -0.00331 | 0.02307  | 0.00413  | 0.03575  |
|     | 3PX | 0.00008  | -0.00189 | 0.00083  | 0.00001  | 0.00086  | 0.00017  | 0.00033  |
|     | 3PY | -0.00004 | -0.00008 | 0.00011  | -0.00005 | 0.00091  | -0.00062 | -0.00058 |
|     | 3PZ | 0.00033  | -0.00217 | 0.00064  | 0.00025  | -0.00193 | 0.00123  | 0.00059  |
| 13C | 1S  | -0.00141 | -0.00325 | -0.00566 | 0.00147  | 0.00002  | -0.00566 | -0.0036  |
|     | 2S  | 0.00264  | 0.01119  | 0.01348  | -0.00954 | -0.00169 | 0.01318  | 0.0113   |
|     | 2PX | -0.01258 | 0.03071  | 0.09305  | 0.01529  | -0.01486 | 0.05255  | -0.05162 |
|     | 2PY | 0.00343  | -0.06634 | -0.04958 | -0.01271 | 0.00026  | -0.03486 | 0.02333  |
|     | 2PZ | 0.01994  | 0.09971  | 0.22737  | 0.04855  | -0.01682 | 0.11112  | -0.21034 |
|     | 3S  | 0.00461  | -0.00066 | 0.01416  | 0.0174   | 0.00928  | 0.01324  | -0.00314 |
|     | 3PX | -0.00137 | 0.02487  | 0.04644  | 0.00349  | -0.01034 | 0.0238   | -0.04435 |
|     | 3PY | -0.00027 | -0.0127  | -0.02674 | -0.00238 | 0.00412  | -0.00912 | 0.03593  |
|     | 3PZ | 0.00561  | 0.06427  | 0.14627  | 0.02511  | -0.01529 | 0.07612  | -0.17423 |
|     | 4XX | -0.0004  | 0.00315  | -0.00209 | -0.0037  | 0.00351  | 0.00654  | 0.01141  |
|     | 4YY | -0.00047 | -0.00353 | 0.00113  | -0.00037 | -0.00155 | 0.00131  | 0.00061  |
|     | 4ZZ | 0.0004   | -0.00061 | -0.0001  | 0.00282  | -0.00245 | -0.00939 | -0.01252 |
|     | 4XY | 0.00115  | -0.00787 | -0.00127 | 0.00077  | -0.00133 | -0.0054  | -0.00582 |
|     | 4XZ | -0.00074 | -0.00223 | -0.00432 | -0.00371 | 0.00345  | 0.01117  | 0.01855  |
|     | 4YZ | -0.00041 | -0.00071 | -0.0047  | -0.00084 | -0.0013  | -0.00748 | -0.00499 |
| 14C | 1S  | 0.00045  | -0.01344 | 0.00068  | 0.00052  | -0.0011  | 0.00015  | -0.00036 |
|     | 2S  | -0.0015  | 0.02979  | -0.00184 | -0.0022  | 0.00295  | 0.00058  | 0.00275  |
|     | 2PX | 0.02674  | -0.00092 | 0.05185  | 0.02182  | -0.00773 | -0.03823 | -0.078   |
|     | 2PY | -0.01241 | 0.11485  | -0.05108 | -0.015   | 0.01376  | 0.01484  | 0.04453  |
|     | 2PZ | 0.02388  | 0.1071   | 0.21292  | 0.09734  | -0.06608 | -0.1111  | -0.27437 |

|     |     |          |          |          |          |          |          |          |
|-----|-----|----------|----------|----------|----------|----------|----------|----------|
|     | 3S  | -0.00035 | 0.075    | -0.00034 | -0.00672 | -0.00484 | -0.00147 | -0.00162 |
|     | 3PX | 0.01067  | -0.0037  | 0.0279   | 0.0112   | -0.00767 | -0.02835 | -0.05411 |
|     | 3PY | -0.00559 | 0.05065  | -0.02588 | -0.01339 | 0.006    | 0.01135  | 0.03498  |
|     | 3PZ | 0.01925  | 0.05494  | 0.12632  | 0.06369  | -0.04364 | -0.08122 | -0.22735 |
|     | 4XX | -0.00008 | 0.00373  | 0.00276  | -0.00026 | 0.0003   | 0.00498  | -0.00647 |
|     | 4YY | -0.00095 | -0.00606 | -0.00073 | -0.00122 | 0.00008  | 0.00194  | -0.00052 |
|     | 4ZZ | 0.0009   | -0.00096 | -0.00153 | 0.0009   | -0.00081 | -0.00656 | 0.00712  |
|     | 4XY | 0.00133  | -0.00543 | 0.00068  | 0.0005   | -0.00074 | -0.00381 | 0.00236  |
|     | 4XZ | -0.00102 | 0.00074  | 0.00592  | 0.00034  | 0.00035  | 0.00836  | -0.01295 |
|     | 4YZ | 0.00109  | 0.00303  | 0.00566  | 0.00292  | -0.00206 | -0.00575 | 0.00037  |
| 15H | 1S  | 0.00126  | -0.04362 | -0.00048 | -0.00445 | -0.00824 | -0.00585 | -0.00386 |
|     | 2S  | 0.00083  | -0.06272 | -0.0018  | -0.00818 | -0.01716 | -0.01578 | -0.02057 |
|     | 3PX | -0.00021 | 0.00133  | 0.00184  | 0.0006   | -0.00034 | 0.0008   | -0.00196 |
|     | 3PY | -0.00004 | 0.00004  | -0.00113 | 0.00017  | 0.00035  | -0.00058 | 0.00061  |
|     | 3PZ | 0.00051  | 0.00264  | 0.00546  | 0.00065  | -0.00041 | 0.00254  | -0.00577 |
| 16H | 1S  | 0.00041  | -0.06894 | 0.01018  | -0.00111 | -0.00281 | 0.0028   | 0.00083  |
|     | 2S  | 0.00095  | -0.07838 | 0.00668  | -0.00413 | -0.00164 | -0.00023 | 0.00469  |
|     | 3PX | 0.00049  | -0.00171 | 0.0013   | 0.00065  | -0.0003  | -0.00107 | -0.00232 |
|     | 3PY | -0.00029 | -0.00091 | -0.00066 | -0.00038 | 0.00023  | 0.00075  | 0.00172  |
|     | 3PZ | 0.00073  | 0.00195  | 0.00485  | 0.00235  | -0.00168 | -0.00307 | -0.00776 |
| 17C | 1S  | 0.00149  | 0.00019  | -0.00005 | -0.00017 | 0.00015  | -0.00055 | -0.00049 |
|     | 2S  | -0.00332 | 0.00269  | 0.00022  | 0.00013  | -0.00053 | 0.00159  | 0.00011  |
|     | 2PX | 0.00449  | 0.03404  | 0.04748  | 0.03071  | -0.02368 | -0.07382 | 0.04648  |
|     | 2PY | -0.00133 | -0.13745 | -0.01286 | -0.01973 | 0.01342  | 0.04584  | -0.02566 |
|     | 2PZ | 0.07678  | 0.02242  | 0.14672  | 0.10135  | -0.07151 | -0.27673 | 0.1568   |
|     | 3S  | -0.00753 | -0.00325 | -0.00151 | 0.00074  | 0.00133  | 0.00321  | 0.0122   |
|     | 3PX | 0.00686  | 0.00071  | 0.02537  | 0.02088  | -0.0122  | -0.05604 | 0.02992  |
|     | 3PY | -0.00169 | -0.02859 | -0.00998 | -0.01255 | 0.0065   | 0.03213  | -0.0247  |
|     | 3PZ | 0.03469  | 0.03153  | 0.09509  | 0.06443  | -0.04945 | -0.18962 | 0.11537  |
|     | 4XX | -0.00156 | 0.00292  | 0.00032  | -0.00035 | 0.0005   | 0.00264  | -0.0095  |
|     | 4YY | -0.00004 | -0.0038  | 0.00229  | 0.00067  | -0.00079 | -0.00066 | -0.00171 |
|     | 4ZZ | 0.00169  | 0.00032  | -0.0025  | -0.00051 | 0.00031  | -0.00195 | 0.01106  |
|     | 4XY | 0.00055  | -0.0118  | -0.00077 | -0.00087 | 0.00032  | 0.00014  | 0.00493  |
|     | 4XZ | -0.00405 | -0.00168 | 0.00212  | -0.00039 | 0.00026  | 0.00588  | -0.01725 |
|     | 4YZ | -0.00194 | 0.0005   | -0.00476 | -0.00234 | 0.00161  | 0.00393  | 0.00549  |
| 18C | 1S  | -0.00091 | -0.00036 | 0.00094  | 0.00023  | -0.00049 | 0.0007   | 0.00025  |
|     | 2S  | 0.0017   | -0.00214 | -0.00183 | -0.00054 | 0.00121  | -0.00111 | -0.0005  |
|     | 2PX | 0.05347  | 0.00652  | 0.01187  | 0.01575  | -0.00946 | -0.0617  | 0.07871  |
|     | 2PY | -0.01859 | 0.14153  | -0.01984 | -0.00845 | 0.00591  | 0.03449  | -0.04702 |
|     | 2PZ | 0.13829  | 0.0453   | 0.06847  | 0.06179  | -0.04515 | -0.20639 | 0.28472  |
|     | 3S  | 0.00443  | 0.00294  | -0.00532 | 0.00063  | 0.00269  | -0.00626 | -0.00641 |
|     | 3PX | 0.02724  | -0.00778 | 0.00722  | 0.01047  | -0.00587 | -0.04288 | 0.06503  |
|     | 3PY | -0.0095  | 0.02783  | -0.00952 | -0.00534 | 0.00603  | 0.02268  | -0.038   |
|     | 3PZ | 0.07392  | 0.01833  | 0.03651  | 0.03899  | -0.02731 | -0.13946 | 0.24347  |

|      |     |          |          |          |          |          |          |          |
|------|-----|----------|----------|----------|----------|----------|----------|----------|
|      | 4XX | -0.00224 | -0.00123 | 0.00314  | 0.00225  | -0.00157 | -0.00619 | 0.00408  |
|      | 4YY | 0.0023   | 0.00274  | -0.00017 | -0.0001  | 0.00005  | 0.0008   | -0.00074 |
|      | 4ZZ | -0.00039 | -0.00055 | -0.00278 | -0.00199 | 0.00142  | 0.00563  | -0.00344 |
|      | 4XY | -0.00152 | -0.01144 | -0.00004 | -0.00077 | 0.00054  | 0.00146  | -0.00065 |
|      | 4XZ | -0.00415 | 0.0007   | 0.00605  | 0.00423  | -0.00298 | -0.01176 | 0.0081   |
|      | 4YZ | -0.00791 | 0.00426  | 0.00116  | 0.00098  | -0.00071 | -0.0026  | 0.00281  |
| 19H  | 1S  | 0.00018  | -0.08975 | 0.0107   | -0.00118 | -0.00106 | 0.00224  | 0.00103  |
|      | 2S  | 0.00056  | -0.10608 | 0.01142  | 0.0007   | -0.00065 | 0.00282  | 0.0019   |
|      | 3PX | 0.00009  | 0.00193  | 0.00099  | 0.0007   | -0.00064 | -0.00187 | 0.00108  |
|      | 3PY | -0.00011 | 0.00121  | -0.00083 | -0.00049 | 0.00031  | 0.00102  | -0.00073 |
|      | 3PZ | 0.00164  | 0.00095  | 0.0035   | 0.0025   | -0.00171 | -0.00674 | 0.00416  |
| 20C  | 1S  | -0.00106 | 0.00003  | -0.00903 | -0.00076 | -0.00056 | -0.01757 | -0.01557 |
|      | 2S  | 0.00225  | -0.0015  | 0.01694  | 0.00142  | 0.00023  | 0.03507  | 0.03298  |
|      | 2PX | -0.00092 | -0.00883 | -0.05115 | -0.0222  | -0.01791 | -0.06192 | -0.03868 |
|      | 2PY | -0.00298 | 0.0503   | -0.0411  | -0.0217  | 0.06632  | -0.06048 | -0.02763 |
|      | 2PZ | 0.00062  | -0.06693 | 0.1189   | 0.01798  | -0.05183 | 0.12643  | 0.08155  |
|      | 3S  | 0.00442  | 0.01347  | 0.04942  | 0.00026  | 0.01055  | 0.1049   | 0.10426  |
|      | 3PX | -0.0044  | 0.00071  | -0.0069  | 0.00027  | -0.01017 | -0.00263 | 0.02123  |
|      | 3PY | 0.00156  | -0.00981 | -0.0076  | -0.01038 | -0.01415 | -0.01787 | -0.01211 |
|      | 3PZ | 0.0006   | -0.00696 | 0.0571   | -0.01005 | -0.0018  | 0.07486  | 0.08271  |
|      | 4XX | 0.00016  | -0.00061 | -0.00166 | -0.00199 | 0.00234  | -0.00444 | -0.00248 |
|      | 4YY | -0.00009 | 0.00666  | -0.00511 | -0.00162 | 0.0029   | -0.00481 | -0.00177 |
|      | 4ZZ | -0.0003  | -0.00682 | 0.00523  | 0.00352  | -0.00556 | 0.00615  | 0.00199  |
|      | 4XY | 0.00031  | -0.00147 | -0.00196 | -0.00111 | -0.00989 | -0.00074 | -0.00063 |
|      | 4XZ | -0.00027 | 0.00332  | -0.00243 | -0.00423 | 0.01022  | -0.0061  | -0.00054 |
|      | 4YZ | 0.00025  | -0.00408 | 0.00013  | -0.00018 | -0.00368 | -0.00083 | -0.00043 |
| 21O  | 1S  | 0.0008   | -0.00779 | 0.00433  | 0.003    | -0.00705 | 0.00721  | 0.00149  |
|      | 2S  | -0.00172 | 0.01781  | -0.01012 | -0.00469 | 0.01453  | -0.01399 | -0.00223 |
|      | 2PX | -0.00337 | -0.02155 | 0.0328   | 0.05873  | 0.03424  | 0.05818  | -0.0017  |
|      | 2PY | 0.0028   | -0.10244 | 0.04025  | 0.03223  | -0.10284 | 0.04533  | 0.00772  |
|      | 2PZ | 0.00324  | 0.12589  | -0.09845 | -0.04025 | 0.07964  | -0.07808 | -0.01811 |
|      | 3S  | -0.00328 | 0.02393  | -0.01478 | -0.01889 | 0.02646  | -0.03831 | -0.00716 |
|      | 3PX | -0.00193 | -0.01569 | 0.02266  | 0.04542  | 0.0299   | 0.046    | -0.00041 |
|      | 3PY | 0.00193  | -0.0762  | 0.0318   | 0.02068  | -0.08352 | 0.03785  | 0.01017  |
|      | 3PZ | 0.00199  | 0.08063  | -0.06666 | -0.03062 | 0.04938  | -0.05984 | -0.01868 |
|      | 4XX | 0.00011  | 0.00096  | -0.00081 | 0.00032  | 0.00074  | -0.00036 | -0.00087 |
|      | 4YY | 0.00015  | -0.00011 | -0.00236 | 0.00042  | -0.00147 | -0.00015 | 0.00022  |
|      | 4ZZ | 0.00006  | -0.00331 | 0.00445  | 0.00212  | -0.00261 | 0.0051   | 0.00254  |
|      | 4XY | -0.00001 | -0.00157 | -0.00049 | 0.00165  | -0.00031 | 0.0001   | -0.00145 |
|      | 4XZ | 0.00004  | 0.00168  | -0.00236 | -0.00153 | 0.00107  | -0.00181 | 0.00042  |
|      | 4YZ | 0.00018  | 0.00592  | -0.00328 | -0.00104 | 0.00215  | -0.00055 | 0.0011   |
| 22Si | 1S  | 0.00057  | 0.00013  | 0.00001  | 0.00118  | -0.00053 | 0.0014   | 0.0008   |
|      | 2S  | -0.0026  | -0.00165 | 0.00144  | -0.0036  | 0.00236  | -0.00494 | -0.00298 |
|      | 2PX | 0.00074  | 0.01139  | -0.03549 | 0.01891  | 0.00946  | 0.0048   | 0.00026  |



|     |     |          |          |          |          |          |          |          |
|-----|-----|----------|----------|----------|----------|----------|----------|----------|
|     | 2PY | 0.00063  | 0.06565  | -0.06579 | 0.00052  | -0.01857 | -0.00287 | -0.00237 |
|     | 2PZ | 0.00074  | 0.00293  | -0.00271 | -0.00566 | 0.02029  | -0.01719 | -0.00557 |
|     | 3S  | 0.0061   | -0.00285 | 0.00615  | 0.02058  | -0.00619 | 0.02247  | 0.0128   |
|     | 3PX | -0.00179 | -0.02769 | 0.08629  | -0.0468  | -0.02388 | -0.01157 | -0.00145 |
|     | 3PY | -0.00153 | -0.15812 | 0.15966  | -0.00114 | 0.04598  | 0.00768  | 0.00629  |
|     | 3PZ | -0.00162 | -0.00819 | 0.00726  | 0.01302  | -0.05199 | 0.04355  | 0.0154   |
|     | 4S  | 0.00145  | 0.01537  | -0.0215  | -0.01934 | -0.00458 | -0.01395 | -0.00444 |
|     | 4PX | -0.00073 | -0.00659 | 0.01458  | 0.02236  | -0.00969 | 0.02153  | 0.00619  |
|     | 4PY | -0.00055 | -0.03361 | 0.02526  | -0.00885 | -0.02673 | 0.01843  | 0.01488  |
|     | 4PZ | 0.00146  | 0.01306  | -0.01243 | -0.00356 | 0.00484  | -0.00945 | -0.00959 |
|     | 5XX | 0.00091  | 0.0209   | -0.02816 | 0.00561  | 0.0007   | -0.00116 | -0.00191 |
|     | 5YY | -0.00031 | -0.00393 | 0.00888  | -0.00852 | -0.00307 | -0.00498 | -0.00124 |
|     | 5ZZ | -0.00111 | -0.01741 | 0.01881  | 0.00109  | 0.00201  | 0.00352  | 0.00078  |
|     | 5XY | -0.00023 | -0.0155  | 0.00953  | 0.00784  | 0.01446  | 0.0017   | -0.00079 |
|     | 5XZ | -0.00061 | 0.00673  | -0.00938 | 0.00996  | -0.00003 | 0.00808  | -0.00044 |
|     | 5YZ | -0.00128 | -0.00156 | -0.00615 | 0.00809  | -0.01894 | 0.01261  | 0.00198  |
| 23C | 1S  | 0.00005  | -0.00454 | 0.01089  | -0.00901 | -0.00262 | -0.00194 | 0.00104  |
|     | 2S  | -0.00009 | 0.0093   | -0.02193 | 0.0161   | 0.00626  | 0.002    | -0.00265 |
|     | 2PX | -0.0014  | 0.05757  | -0.10485 | 0.04133  | 0.0185   | 0.0155   | -0.00129 |
|     | 2PY | 0.00389  | 0.06007  | -0.08673 | 0.04073  | 0.00432  | 0.00255  | -0.00392 |
|     | 2PZ | 0.01443  | 0.00912  | -0.0291  | 0.02112  | 0.01249  | 0.00162  | -0.00246 |
|     | 3S  | -0.00026 | 0.01785  | -0.04846 | 0.05533  | 0.00856  | 0.01659  | -0.00608 |
|     | 3PX | -0.00054 | 0.02747  | -0.05507 | 0.0277   | 0.00673  | 0.01767  | 0.00292  |
|     | 3PY | 0.00214  | 0.03771  | -0.04632 | 0.02607  | 0.00869  | 0.00238  | -0.00343 |
|     | 3PZ | 0.00654  | 0.0049   | -0.01222 | 0.00605  | -0.00049 | 0.00686  | 0.00372  |
|     | 4XX | 0.00028  | 0.00255  | -0.00344 | 0.0012   | 0.00011  | -0.00014 | -0.00021 |
|     | 4YY | 0.00012  | -0.00075 | 0.00142  | -0.00103 | 0.00004  | -0.00051 | -0.00005 |
|     | 4ZZ | -0.00034 | -0.00204 | 0.00267  | -0.00173 | -0.00019 | -0.00034 | 0.0001   |
|     | 4XY | 0.00016  | -0.00227 | 0.00164  | 0        | 0.00109  | 0.0003   | 0.00022  |
|     | 4XZ | 0.00002  | 0.00194  | -0.0027  | 0.00098  | -0.00037 | 0.0003   | 0.00009  |
|     | 4YZ | -0.00068 | 0.00048  | -0.00045 | -0.00044 | -0.00065 | 0.0005   | 0.00026  |
| 24H | 1S  | -0.00988 | -0.01965 | 0.03313  | -0.01882 | -0.00628 | 0.00065  | 0.00255  |
|     | 2S  | -0.00878 | -0.02178 | 0.04169  | -0.02516 | -0.01311 | 0.00554  | 0.00693  |
|     | 3PX | -0.00003 | 0.00165  | -0.00279 | 0.00104  | 0.00045  | 0.00025  | -0.00014 |
|     | 3PY | -0.00018 | 0.00061  | -0.00089 | 0.00043  | -0.00014 | 0.00015  | 0.00001  |
|     | 3PZ | -0.00018 | -0.00057 | 0.00094  | -0.00033 | -0.00003 | 0.00014  | 0.00005  |
| 25H | 1S  | 0.00546  | -0.03427 | 0.0432   | -0.01133 | 0.00435  | -0.00401 | -0.00025 |
|     | 2S  | 0.00525  | -0.03838 | 0.05461  | -0.01133 | 0.00498  | 0.00103  | 0.00402  |
|     | 3PX | 0.00011  | 0.00098  | -0.00203 | 0.00083  | 0.00047  | 0.00018  | -0.0001  |
|     | 3PY | 0.00026  | 0.00018  | -0.00045 | 0.00066  | 0.00015  | 0.00005  | -0.00009 |
|     | 3PZ | 0.00011  | 0.00157  | -0.0025  | 0.00086  | 0.00024  | 0.00008  | -0.00004 |
| 26H | 1S  | 0.00138  | 0.01314  | -0.00836 | 0.00414  | -0.00717 | -0.00445 | -0.0017  |
|     | 2S  | 0.00151  | 0.01062  | 0.00081  | -0.01038 | -0.01416 | 0.00124  | 0.00582  |
|     | 3PX | 0.00002  | 0.00131  | -0.0023  | 0.00096  | 0.00031  | 0.00022  | -0.00001 |

|     |     |          |          |          |          |          |          |          |
|-----|-----|----------|----------|----------|----------|----------|----------|----------|
|     | 3PY | 0.00005  | 0.00106  | -0.00154 | -0.00023 | 0.00027  | 0.00011  | 0.00004  |
|     | 3PZ | 0.00029  | 0.0003   | -0.00048 | 0.00005  | 0.00016  | 0.00013  | 0.00003  |
| 27C | 1S  | -0.00003 | -0.00785 | 0.00528  | 0.00337  | 0.00774  | 0.00131  | 0.00034  |
|     | 2S  | -0.00003 | 0.0149   | -0.01091 | -0.00609 | -0.0155  | -0.00323 | -0.00124 |
|     | 2PX | 0.00007  | -0.04168 | 0.0115   | 0.02273  | 0.0394   | 0.00709  | 0.00101  |
|     | 2PY | 0.00288  | 0.10567  | -0.08775 | -0.02418 | -0.0567  | -0.01177 | -0.00198 |
|     | 2PZ | 0.00866  | -0.00083 | 0.00323  | -0.00457 | -0.00748 | -0.00348 | -0.00128 |
|     | 3S  | 0.00084  | 0.03731  | -0.02087 | -0.01825 | -0.0387  | -0.00338 | -0.00098 |
|     | 3PX | 0.00056  | -0.01751 | 0.00379  | 0.01234  | 0.03393  | -0.00283 | -0.00384 |
|     | 3PY | 0.00169  | 0.05693  | -0.04923 | -0.02079 | -0.03073 | -0.01108 | 0.00056  |
|     | 3PZ | 0.00347  | 0.00336  | 0.00145  | -0.00069 | 0.00393  | 0.00041  | 0.00234  |
|     | 4XX | 0.00023  | 0.00246  | -0.00383 | 0.00075  | -0.00016 | -0.00013 | -0.00022 |
|     | 4YY | 0.00013  | -0.00105 | 0.00195  | -0.0003  | -0.00031 | -0.00001 | -0.00001 |
|     | 4ZZ | -0.00034 | -0.00218 | 0.00226  | 0.00056  | 0.00116  | 0.0003   | -0.00011 |
|     | 4XY | 0.00002  | -0.00209 | 0.0015   | 0.00033  | 0.0013   | -0.00002 | -0.00009 |
|     | 4XZ | -0.00006 | 0.00053  | -0.00093 | 0.00012  | 0        | -0.00009 | -0.00009 |
|     | 4YZ | -0.00034 | 0.00151  | -0.00152 | 0.00043  | -0.00024 | 0.00066  | 0.00014  |
| 28H | 1S  | 0.00171  | 0.00086  | -0.01653 | 0.00829  | 0.00765  | 0.00104  | -0.00044 |
|     | 2S  | 0.00095  | -0.00663 | -0.01378 | 0.00909  | 0.00388  | 0.0039   | 0.00232  |
|     | 3PX | -0.00007 | -0.00049 | 0.00058  | 0.00015  | 0.00066  | 0.00002  | -0.00002 |
|     | 3PY | 0.00005  | 0.00237  | -0.0016  | -0.00071 | -0.00146 | -0.00026 | -0.00006 |
|     | 3PZ | 0.00017  | 0.00007  | 0.00012  | -0.00018 | -0.00035 | -0.00011 | -0.00009 |
| 29H | 1S  | 0.00257  | -0.03957 | 0.0394   | 0.00141  | 0.01085  | -0.0001  | -0.00058 |
|     | 2S  | 0.00241  | -0.05247 | 0.04289  | -0.00295 | 0.01375  | -0.00175 | 0.00385  |
|     | 3PX | 0.00001  | -0.00186 | 0.00129  | 0.00054  | 0.00096  | 0.00028  | 0.00008  |
|     | 3PY | 0.00016  | 0.00105  | -0.00085 | -0.00052 | -0.001   | -0.00026 | -0.00004 |
|     | 3PZ | 0.00009  | 0.0013   | -0.0014  | -0.00013 | -0.00062 | -0.00015 | -0.00008 |
| 30H | 1S  | -0.00622 | -0.02011 | 0.01755  | 0.00647  | 0.01283  | 0.00506  | 0.00132  |
|     | 2S  | -0.00589 | -0.02376 | 0.02071  | 0.00533  | 0.01958  | 0.00707  | 0.00449  |
|     | 3PX | 0.00001  | -0.00128 | 0.00062  | 0.0006   | 0.00087  | 0.00032  | 0.00012  |
|     | 3PY | -0.00009 | 0.00192  | -0.0016  | -0.00043 | -0.00102 | -0.00023 | -0.00003 |
|     | 3PZ | -0.00013 | -0.00111 | 0.00093  | 0.00014  | 0.00059  | 0.0001   | 0.00009  |
| 31C | 1S  | -0.00008 | 0.00799  | -0.01239 | 0.00421  | -0.00931 | 0.00526  | 0.00128  |
|     | 2S  | 0.00001  | -0.01486 | 0.0225   | -0.00975 | 0.01675  | -0.01046 | -0.00156 |
|     | 2PX | -0.00264 | 0.03508  | -0.05385 | 0.01557  | -0.00102 | 0.0082   | 0.00184  |
|     | 2PY | -0.007   | 0.10417  | -0.11086 | 0.01187  | -0.05023 | 0.01851  | 0.00175  |
|     | 2PZ | -0.00527 | -0.04725 | 0.07475  | -0.02716 | 0.06169  | -0.03206 | -0.00416 |
|     | 3S  | 0.00126  | -0.0335  | 0.0609   | -0.01804 | 0.05655  | -0.03016 | -0.01199 |
|     | 3PX | -0.00121 | 0.01623  | -0.02913 | 0.00621  | -0.00108 | 0.00147  | 0.002    |
|     | 3PY | -0.00394 | 0.0526   | -0.0596  | 0.01811  | -0.03537 | 0.02049  | 0.00323  |
|     | 3PZ | -0.00261 | -0.03337 | 0.04564  | -0.00603 | 0.03533  | -0.01719 | -0.0052  |
|     | 4XX | -0.00035 | 0.00281  | -0.00324 | 0.00008  | 0.00023  | -0.00005 | 0.00018  |
|     | 4YY | -0.00004 | 0.00081  | -0.00018 | -0.00044 | -0.00042 | -0.00036 | 0.00002  |
|     | 4ZZ | 0.00035  | -0.00324 | 0.00216  | 0.00055  | -0.00159 | 0.00141  | 0.00047  |

|     |     |          |          |          |          |          |          |          |
|-----|-----|----------|----------|----------|----------|----------|----------|----------|
|     | 4XY | 0.00001  | -0.00148 | 0.00056  | 0.00066  | 0.00206  | -0.00029 | -0.00005 |
|     | 4XZ | -0.00015 | 0.00168  | -0.00172 | 0.00009  | -0.00041 | -0.00007 | -0.00011 |
|     | 4YZ | 0.00009  | 0.00147  | -0.00258 | 0.00086  | -0.00099 | 0.00053  | 0.00001  |
| 32H | 1S  | 0.00486  | -0.00538 | -0.00862 | 0.01236  | -0.02081 | 0.01394  | 0.00218  |
|     | 2S  | 0.00397  | -0.00435 | -0.014   | 0.02207  | -0.02597 | 0.0184   | 0.0003   |
|     | 3PX | -0.00007 | 0.00083  | -0.00109 | 0.00026  | -0.00008 | 0.00024  | 0.00007  |
|     | 3PY | -0.00004 | 0.00215  | -0.00264 | 0.00057  | -0.00167 | 0.00081  | 0.00009  |
|     | 3PZ | 0.00014  | -0.00105 | 0.00098  | 0.00019  | 0.00046  | -0.00016 | -0.00011 |
| 33H | 1S  | -0.00237 | 0.03462  | -0.02591 | -0.00488 | -0.01969 | 0.00169  | -0.00021 |
|     | 2S  | -0.00188 | 0.03874  | -0.03604 | -0.00145 | -0.0165  | -0.00285 | -0.00019 |
|     | 3PX | -0.00013 | 0.00202  | -0.00228 | 0.00066  | -0.00062 | 0.0002   | -0.00008 |
|     | 3PY | -0.00005 | 0.00096  | -0.00149 | 0.00106  | -0.00035 | 0.00057  | 0.0001   |
|     | 3PZ | -0.00011 | -0.00111 | 0.00164  | -0.00046 | 0.00185  | -0.00074 | 0        |
| 34H | 1S  | -0.00409 | 0.03179  | -0.03802 | 0.00379  | 0.00516  | -0.0002  | 0.00023  |
|     | 2S  | -0.00344 | 0.03956  | -0.0517  | 0.00635  | -0.0061  | 0.00369  | -0.00012 |
|     | 3PX | 0.00015  | -0.00085 | 0.00066  | 0.00015  | -0.0004  | 0.00032  | 0.00013  |
|     | 3PY | -0.00006 | 0.00177  | -0.00202 | 0.00035  | -0.00112 | 0.00035  | 0.00001  |
|     | 3PZ | -0.00005 | -0.00172 | 0.00232  | -0.00082 | 0.00061  | -0.00056 | -0.00007 |
| 35C | 1S  | 0.00099  | -0.00919 | 0.00265  | 0.00191  | -0.01926 | 0.00536  | 0.00055  |
|     | 2S  | -0.00207 | 0.02429  | -0.00814 | -0.00399 | 0.04141  | -0.01045 | -0.00315 |
|     | 2PX | -0.00247 | 0.03895  | -0.01038 | 0.00297  | 0.08267  | -0.01949 | -0.00501 |
|     | 2PY | 0.00197  | -0.06245 | 0.05045  | 0.00856  | -0.09023 | 0.03531  | 0.00749  |
|     | 2PZ | -0.00006 | 0.01464  | 0.02318  | -0.02698 | 0.0171   | -0.01846 | -0.00732 |
|     | 3S  | -0.003   | 0.03289  | 0.01137  | -0.0153  | 0.1107   | -0.00547 | 0.03322  |
|     | 3PX | -0.00357 | 0.04039  | -0.02961 | -0.0035  | 0.06274  | -0.04101 | -0.02666 |
|     | 3PY | 0.00342  | -0.01588 | 0.00718  | -0.00707 | -0.03512 | -0.00324 | -0.02977 |
|     | 3PZ | -0.00141 | 0.01169  | 0.00597  | -0.0087  | 0.00506  | -0.01777 | -0.00971 |
|     | 4XX | 0.00005  | 0.00151  | -0.00484 | 0.00558  | 0.00074  | -0.00175 | -0.00193 |
|     | 4YY | 0.00012  | 0.0005   | 0.00313  | -0.00575 | -0.00159 | 0.00074  | 0.00058  |
|     | 4ZZ | 0.00006  | -0.00091 | 0.00095  | -0.00009 | -0.00043 | 0.00175  | 0.00139  |
|     | 4XY | -0.00027 | -0.00285 | 0.00291  | 0.00062  | -0.00136 | 0.00271  | 0.00111  |
|     | 4XZ | 0.00008  | 0.00241  | 0.00142  | -0.01033 | -0.00104 | -0.00069 | 0.00161  |
|     | 4YZ | -0.00011 | -0.00013 | 0.00124  | -0.01111 | -0.00376 | -0.00291 | -0.0008  |
| 36C | 1S  | -0.00017 | -0.00184 | -0.00429 | 0.00019  | 0.00342  | -0.00621 | -0.00282 |
|     | 2S  | 0.00102  | 0.00664  | 0.01369  | 0.00048  | -0.00684 | 0.01767  | 0.00313  |
|     | 2PX | -0.00183 | -0.005   | -0.00348 | -0.08754 | -0.04189 | -0.00966 | 0.00628  |
|     | 2PY | 0.00725  | -0.00655 | -0.05744 | 0.06314  | 0.01454  | -0.03662 | -0.02685 |
|     | 2PZ | -0.00282 | -0.02206 | -0.03067 | 0.21448  | 0.02736  | 0.02453  | -0.01516 |
|     | 3S  | -0.00349 | 0.0145   | -0.01888 | -0.00406 | -0.00195 | -0.00418 | 0.01377  |
|     | 3PX | -0.00076 | 0.01064  | -0.01236 | -0.05553 | -0.01966 | -0.03823 | -0.04464 |
|     | 3PY | 0.00118  | -0.00472 | -0.04546 | 0.04646  | 0.01085  | -0.03244 | -0.01054 |
|     | 3PZ | -0.00195 | -0.01691 | -0.03453 | 0.13659  | 0.02045  | -0.01125 | -0.03712 |
|     | 4XX | -0.00002 | 0.00158  | -0.00227 | 0.00414  | 0.00319  | 0.00045  | -0.00038 |
|     | 4YY | 0        | -0.0003  | 0.00269  | 0.00436  | -0.00092 | 0.00289  | -0.0007  |

|     |     |          |          |          |          |          |          |          |
|-----|-----|----------|----------|----------|----------|----------|----------|----------|
|     | 4ZZ | 0.00006  | -0.0012  | 0.00009  | -0.00848 | -0.00218 | -0.00418 | -0.00112 |
|     | 4XY | -0.0002  | -0.00191 | 0.0033   | -0.00387 | -0.00532 | 0.00179  | 0.00094  |
|     | 4XZ | 0.00007  | 0.00092  | 0.00099  | -0.00466 | -0.00048 | -0.00179 | -0.00156 |
|     | 4YZ | 0.00004  | -0.00011 | -0.00023 | 0.00485  | 0.0003   | 0.00236  | 0.00135  |
| 37C | 1S  | 0.00068  | -0.00064 | 0.0022   | -0.00078 | -0.00448 | 0.00324  | 0.0023   |
|     | 2S  | -0.00144 | 0.00254  | -0.00178 | 0.00067  | 0.00946  | -0.00755 | -0.0086  |
|     | 2PX | 0.00426  | 0.0063   | 0.02119  | -0.10999 | -0.01284 | -0.03235 | -0.00747 |
|     | 2PY | -0.00496 | -0.00587 | 0.00841  | 0.0826   | 0.00959  | 0.03545  | 0.00971  |
|     | 2PZ | 0.00444  | 0.02041  | -0.05339 | 0.25159  | 0.08962  | 0.04178  | -0.0082  |
|     | 3S  | -0.00299 | -0.00539 | -0.01855 | 0.01022  | 0.01271  | -0.0154  | -0.02207 |
|     | 3PX | 0.00252  | 0.0008   | 0.03123  | -0.07371 | -0.02343 | -0.00437 | -0.01191 |
|     | 3PY | -0.00234 | -0.0075  | 0.00507  | 0.05614  | 0.00322  | 0.04153  | 0.02981  |
|     | 3PZ | 0.00291  | 0.01159  | -0.02412 | 0.15845  | 0.05183  | 0.03597  | -0.00529 |
|     | 4XX | 0.00002  | -0.00084 | -0.00042 | -0.00251 | -0.00208 | -0.00096 | -0.00071 |
|     | 4YY | 0        | 0.00164  | 0.00274  | -0.00282 | 0.00039  | 0.00176  | 0.00076  |
|     | 4ZZ | 0.00012  | -0.00086 | -0.00049 | 0.00517  | 0.00025  | -0.00007 | -0.00101 |
|     | 4XY | -0.00035 | -0.00118 | -0.00028 | 0.00335  | 0.00032  | 0.00025  | -0.00023 |
|     | 4XZ | 0.0001   | 0.00005  | -0.00132 | 0.0029   | 0.00005  | 0.00008  | -0.00073 |
|     | 4YZ | -0.00009 | 0.00115  | -0.00052 | -0.00342 | 0.00005  | 0.00002  | 0.00068  |
| 38C | 1S  | -0.00016 | -0.00044 | -0.00204 | 0.00071  | -0.00296 | -0.00101 | -0.00089 |
|     | 2S  | 0.00008  | 0.00012  | 0.00605  | -0.00164 | 0.00616  | 0.00405  | 0.0027   |
|     | 2PX | -0.00463 | -0.02064 | 0.00206  | -0.01131 | 0.00055  | -0.01276 | -0.00577 |
|     | 2PY | 0.00635  | 0.01569  | -0.02654 | 0.01124  | 0.01322  | -0.00387 | -0.00169 |
|     | 2PZ | -0.00263 | 0.03377  | -0.00789 | 0.02497  | 0.0342   | 0.02682  | 0.01254  |
|     | 3S  | 0.00118  | 0.0095   | -0.00464 | 0.00161  | 0.02002  | -0.01892 | -0.0099  |
|     | 3PX | -0.00176 | -0.01131 | -0.00879 | -0.0001  | 0.00315  | -0.01601 | -0.00131 |
|     | 3PY | 0.00196  | 0.0056   | -0.0111  | 0.01218  | 0.00379  | 0.00952  | 0.0062   |
|     | 3PZ | -0.00076 | 0.02401  | -0.01054 | 0.01983  | 0.02889  | 0.01202  | 0.00763  |
|     | 4XX | -0.00004 | -0.00068 | -0.00164 | 0.00762  | 0.00151  | 0.00113  | 0        |
|     | 4YY | 0.00001  | -0.00024 | 0.00128  | -0.00673 | -0.00184 | -0.00176 | -0.00027 |
|     | 4ZZ | 0.00014  | 0.0012   | -0.00041 | -0.00062 | 0.00021  | -0.00012 | -0.0002  |
|     | 4XY | -0.00057 | -0.00069 | 0.00109  | 0.00058  | -0.00014 | 0.00117  | 0.00041  |
|     | 4XZ | 0.00024  | 0.00164  | 0.0008   | -0.0106  | -0.00245 | -0.00229 | -0.00017 |
|     | 4YZ | -0.00026 | -0.00044 | 0.00232  | -0.0115  | -0.00346 | -0.00164 | 0.00056  |
| 39C | 1S  | 0.00095  | -0.00363 | 0.00218  | 0.00109  | -0.00016 | 0.00155  | 0.00044  |
|     | 2S  | -0.00215 | 0.00657  | -0.00424 | 0.00086  | 0.00237  | -0.00334 | -0.00121 |
|     | 2PX | 0.00259  | 0.00213  | -0.01661 | 0.0857   | 0.01518  | 0.00765  | -0.00317 |
|     | 2PY | -0.00413 | -0.01012 | 0.03232  | -0.08577 | -0.03097 | -0.00327 | 0.00248  |
|     | 2PZ | 0.00378  | 0.05385  | 0.01978  | -0.22564 | -0.0438  | -0.03943 | -0.00158 |
|     | 3S  | -0.00421 | 0.01442  | 0.00278  | -0.02014 | -0.03133 | 0.00842  | 0.001    |
|     | 3PX | 0        | 0.00245  | -0.01691 | 0.05913  | 0.00693  | 0.0013   | -0.00111 |
|     | 3PY | -0.00235 | -0.00319 | 0.01392  | -0.0546  | -0.00502 | -0.01209 | -0.00101 |
|     | 3PZ | 0.00138  | 0.03092  | 0.00931  | -0.14037 | -0.03663 | -0.02515 | -0.00157 |
|     | 4XX | 0.00003  | 0.0008   | -0.00156 | 0.00421  | 0.00397  | 0.00077  | 0.0003   |

|     |     |          |          |          |          |          |          |          |
|-----|-----|----------|----------|----------|----------|----------|----------|----------|
|     | 4YY | -0.00012 | -0.00185 | 0.00119  | 0.00337  | -0.00189 | 0.00194  | 0.00061  |
|     | 4ZZ | 0.00015  | -0.00037 | 0.00154  | -0.00674 | -0.00244 | -0.00185 | -0.00073 |
|     | 4XY | -0.00035 | -0.00093 | 0.00214  | -0.00422 | -0.00183 | -0.00037 | -0.00013 |
|     | 4XZ | 0.00008  | -0.00051 | 0.0006   | -0.00531 | -0.00152 | -0.00213 | -0.0008  |
|     | 4YZ | -0.00012 | -0.00046 | -0.00089 | 0.00263  | 0.00194  | -0.00005 | 0.00004  |
| 40C | 1S  | -0.00053 | 0.00523  | -0.00594 | 0.00094  | -0.00278 | -0.003   | -0.00125 |
|     | 2S  | 0.00133  | -0.01103 | 0.01397  | -0.00112 | 0.00794  | 0.00708  | 0.00282  |
|     | 2PX | -0.00461 | -0.0168  | -0.01522 | 0.06798  | 0.06628  | 0.00591  | 0.00127  |
|     | 2PY | 0.00264  | 0.03805  | -0.01894 | -0.09313 | 0.0079   | -0.04368 | -0.01208 |
|     | 2PZ | -0.00092 | -0.00213 | 0.06496  | -0.24133 | -0.07358 | -0.04015 | -0.00833 |
|     | 3S  | 0.00017  | -0.03054 | 0.03012  | -0.00387 | 0.01041  | 0.01905  | 0.01953  |
|     | 3PX | -0.00083 | -0.00444 | -0.01059 | 0.04348  | 0.03106  | 0.01021  | -0.00087 |
|     | 3PY | 0.00222  | 0.01516  | -0.00042 | -0.07341 | 0.03241  | -0.03608 | -0.01652 |
|     | 3PZ | 0.00012  | 0.00086  | 0.04349  | -0.17127 | -0.06317 | -0.02581 | -0.00147 |
|     | 4XX | 0.00001  | -0.00012 | -0.00015 | -0.00381 | -0.00207 | -0.00066 | -0.00009 |
|     | 4YY | -0.00011 | 0.00114  | 0.00016  | -0.00246 | 0.001    | -0.00061 | 0.00006  |
|     | 4ZZ | -0.00004 | -0.00076 | -0.00059 | 0.00664  | 0.00163  | 0.00097  | 0.00014  |
|     | 4XY | -0.00007 | -0.00362 | 0.00121  | 0.00386  | -0.00109 | 0.0019   | 0.00067  |
|     | 4XZ | -0.00001 | 0        | -0.00151 | 0.00424  | 0.00168  | 0.00044  | 0.00015  |
|     | 4YZ | -0.00002 | 0.0003   | -0.00058 | -0.00372 | -0.00098 | -0.00034 | 0.00016  |
| 41H | 1S  | -0.00348 | -0.00111 | 0.03457  | 0.00745  | -0.0095  | 0.02738  | 0.00556  |
|     | 2S  | -0.00234 | -0.00493 | 0.01333  | 0.00904  | -0.01551 | 0.00006  | -0.01302 |
|     | 3PX | -0.00005 | -0.00016 | 0.00068  | -0.00181 | -0.00112 | 0.00005  | -0.00039 |
|     | 3PY | -0.00015 | 0.00008  | 0.00066  | 0.00198  | 0.00069  | 0.00145  | 0.00114  |
|     | 3PZ | 0        | -0.00149 | -0.00253 | 0.00502  | 0.00051  | -0.00229 | -0.00238 |
| 42H | 1S  | 0.0061   | 0.0081   | -0.0105  | 0.00153  | -0.00008 | -0.00605 | -0.00299 |
|     | 2S  | 0.00548  | 0.0105   | -0.0157  | 0.00181  | 0.00405  | -0.01274 | -0.00544 |
|     | 3PX | 0.0001   | -0.00025 | -0.00015 | -0.00023 | -0.00011 | -0.0004  | -0.00027 |
|     | 3PY | -0.00009 | 0.00018  | -0.00024 | 0.00024  | 0.00042  | 0.00002  | -0.00011 |
|     | 3PZ | 0.00009  | 0.00093  | -0.0004  | 0.00062  | 0.00077  | 0.00065  | 0.00041  |
| 43H | 1S  | -0.0015  | -0.01109 | 0.00165  | -0.00865 | 0.01325  | -0.00237 | 0.00096  |
|     | 2S  | -0.00139 | -0.0083  | -0.00702 | 0.014    | -0.01294 | 0.00359  | 0.0044   |
|     | 3PX | 0.00001  | 0.00015  | -0.00071 | 0.00277  | -0.00165 | 0.00085  | 0.00017  |
|     | 3PY | 0.0001   | 0.00071  | -0.00001 | -0.0022  | 0.0007   | -0.00086 | -0.00008 |
|     | 3PZ | 0.00002  | 0.00022  | 0.00141  | -0.00543 | -0.00306 | -0.00077 | -0.00016 |
| 44C | 1S  | -0.00076 | -0.00042 | 0.00474  | 0.00403  | 0.00198  | 0.00736  | 0.00393  |
|     | 2S  | 0.00185  | 0.00002  | -0.00864 | -0.01167 | -0.0049  | -0.0161  | -0.00671 |
|     | 2PX | -0.00114 | -0.00095 | 0.04419  | 0.02432  | 0.02506  | 0.04464  | 0.02176  |
|     | 2PY | 0.00019  | 0.01586  | -0.03735 | 0.0353   | -0.17685 | 0.04205  | 0.00054  |
|     | 2PZ | -0.00041 | -0.02367 | 0.05443  | -0.03015 | 0.22912  | -0.03316 | 0.00836  |
|     | 3S  | 0.0017   | 0.00251  | -0.03702 | 0.00017  | 0.00373  | -0.04011 | -0.03362 |
|     | 3PX | -0.00198 | -0.01063 | 0.0309   | 0.01855  | 0.00651  | 0.04541  | 0.05023  |
|     | 3PY | -0.00256 | 0.02372  | -0.02116 | 0.03235  | -0.09657 | 0.04042  | 0.01756  |
|     | 3PZ | -0.00189 | -0.00657 | 0.04169  | -0.02128 | 0.15414  | -0.01356 | 0.01593  |

|     |     |          |          |          |          |          |          |          |
|-----|-----|----------|----------|----------|----------|----------|----------|----------|
|     | 4XX | -0.0001  | -0.0001  | -0.0001  | -0.0013  | 0.00112  | -0.00082 | 0.00031  |
|     | 4YY | 0.0001   | 0.00017  | 0.00071  | 0.00376  | -0.00288 | 0.00133  | 0.00097  |
|     | 4ZZ | -0.00005 | -0.00055 | -0.00061 | -0.00276 | 0.00186  | -0.00036 | -0.00079 |
|     | 4XY | -0.00004 | -0.00143 | -0.00072 | -0.0002  | -0.00583 | 0.00197  | 0.00049  |
|     | 4XZ | -0.00005 | 0.00196  | -0.00301 | -0.00091 | 0.00731  | -0.00546 | -0.00296 |
|     | 4YZ | 0.00014  | -0.00016 | -0.0003  | -0.00062 | 0.00081  | -0.00013 | -0.00031 |
| 45C | 1S  | 0.00001  | 0.00056  | -0.00113 | -0.00369 | -0.00077 | -0.00342 | -0.00146 |
|     | 2S  | -0.00014 | 0.00017  | 0.00278  | 0.00834  | 0.00175  | 0.00951  | 0.00631  |
|     | 2PX | -0.00484 | 0.00105  | -0.01439 | -0.02415 | -0.00061 | -0.01965 | -0.00857 |
|     | 2PY | 0.00016  | 0.00813  | -0.00404 | 0.05325  | -0.1078  | 0.02582  | 0.0149   |
|     | 2PZ | -0.00026 | -0.00768 | 0.0074   | -0.06499 | 0.13692  | -0.03237 | -0.01227 |
|     | 3S  | 0.0026   | -0.01007 | -0.00311 | 0.01417  | -0.00177 | -0.00028 | -0.01966 |
|     | 3PX | -0.00138 | 0.0067   | -0.00827 | -0.00924 | 0.01029  | -0.01079 | -0.01909 |
|     | 3PY | -0.001   | 0.01198  | 0.00182  | 0.04703  | -0.06228 | 0.0363   | 0.02815  |
|     | 3PZ | -0.00136 | 0.00115  | -0.00236 | -0.02665 | 0.10886  | -0.01746 | -0.00543 |
|     | 4XX | -0.00001 | 0.00042  | -0.00078 | -0.00093 | -0.0009  | -0.0006  | -0.00033 |
|     | 4YY | 0.00005  | -0.00077 | 0.00282  | -0.00051 | 0.01077  | -0.00163 | 0.00046  |
|     | 4ZZ | 0.00006  | 0.00089  | -0.00183 | 0.00139  | -0.01012 | 0.00254  | 0.00019  |
|     | 4XY | -0.00007 | -0.00043 | -0.00036 | -0.00004 | 0.00279  | -0.00271 | -0.00122 |
|     | 4XZ | -0.00005 | 0.00032  | -0.00258 | -0.00245 | -0.00586 | 0.00004  | -0.00021 |
|     | 4YZ | 0.00013  | 0.00008  | 0.00014  | 0.00066  | -0.00271 | 0.00152  | 0.00046  |
| 46C | 1S  | -0.00033 | -0.00011 | 0.00091  | 0.00189  | -0.00003 | 0.00269  | 0.00113  |
|     | 2S  | 0.00084  | 0.00071  | -0.00266 | -0.00451 | -0.00137 | -0.0055  | -0.00299 |
|     | 2PX | 0.0045   | -0.00073 | 0.01211  | 0.01149  | 0.00064  | 0.01695  | 0.00644  |
|     | 2PY | 0.0014   | -0.00578 | 0.03076  | 0.03353  | 0.08221  | -0.01891 | -0.00526 |
|     | 2PZ | 0.00033  | 0.00507  | -0.03285 | -0.03402 | -0.09524 | 0.02858  | 0.00828  |
|     | 3S  | 0.00097  | -0.00707 | 0.005    | -0.00746 | 0.00763  | -0.00958 | 0.00668  |
|     | 3PX | 0.00142  | 0.00284  | 0.00336  | 0.01184  | 0.01372  | 0.01058  | -0.00352 |
|     | 3PY | 0.00147  | -0.00387 | 0.01432  | 0.01678  | 0.04424  | -0.02117 | -0.01278 |
|     | 3PZ | 0.0009   | 0.00251  | -0.01836 | -0.03312 | -0.06488 | 0.01231  | 0.00128  |
|     | 4XX | -0.00016 | 0.00012  | -0.00025 | 0.00052  | -0.00194 | 0.00072  | 0.00061  |
|     | 4YY | 0.00007  | 0.00025  | -0.00077 | 0.00025  | -0.00304 | 0.00093  | 0.00017  |
|     | 4ZZ | 0.00006  | -0.00033 | 0.00122  | -0.0004  | 0.00472  | -0.0008  | -0.00028 |
|     | 4XY | -0.00012 | -0.00057 | 0.00104  | -0.00297 | 0.00903  | -0.00239 | -0.00099 |
|     | 4XZ | -0.00006 | 0.00067  | -0.00155 | 0.00332  | -0.0114  | 0.00276  | 0.00118  |
|     | 4YZ | 0.00011  | -0.00008 | 0.00037  | 0.0003   | 0.00029  | 0.00025  | 0.00016  |
| 47C | 1S  | 0.00003  | 0.00006  | 0.00008  | -0.00004 | 0        | -0.00007 | -0.00014 |
|     | 2S  | 0.00008  | -0.00042 | 0.00053  | 0.00081  | 0.00064  | 0.00092  | 0.0009   |
|     | 2PX | -0.00443 | 0.00142  | -0.009   | -0.0006  | -0.02026 | 0.00048  | -0.00024 |
|     | 2PY | -0.00067 | -0.01156 | 0.03775  | -0.02454 | 0.17763  | -0.03917 | -0.01182 |
|     | 2PZ | -0.00038 | 0.01562  | -0.04211 | 0.03618  | -0.21828 | 0.05346  | 0.01681  |
|     | 3S  | 0.00048  | 0.00417  | -0.00556 | -0.01144 | -0.0089  | -0.00982 | -0.00769 |
|     | 3PX | -0.00196 | -0.00375 | 0.0013   | 0.00657  | -0.00549 | 0.00839  | 0.00572  |
|     | 3PY | -0.00022 | -0.01018 | 0.02708  | -0.01857 | 0.11688  | -0.02703 | -0.00625 |

|     |     |          |          |          |          |          |          |          |
|-----|-----|----------|----------|----------|----------|----------|----------|----------|
|     | 3PZ | -0.00017 | 0.01     | -0.02976 | 0.02639  | -0.16475 | 0.0415   | 0.01844  |
|     | 4XX | -0.0003  | 0.00002  | -0.00046 | -0.00077 | 0.00043  | -0.00088 | -0.00038 |
|     | 4YY | 0.00014  | 0.00052  | 0.00004  | 0.00394  | -0.00225 | -0.00008 | -0.00052 |
|     | 4ZZ | 0.00012  | -0.00046 | 0.00014  | -0.00357 | 0.00174  | 0.00063  | 0.00072  |
|     | 4XY | -0.00021 | 0.00035  | -0.00169 | -0.00072 | -0.00327 | 0.0004   | 0        |
|     | 4XZ | -0.00012 | -0.00034 | 0.00094  | 0.00006  | 0.00419  | -0.00106 | -0.00019 |
|     | 4YZ | 0.00014  | -0.00014 | 0.00032  | -0.00085 | 0.00097  | 0.0002   | 0.00021  |
| 48C | 1S  | -0.00044 | 0.00011  | 0.00144  | -0.00054 | 0.00085  | 0.0015   | 0.00133  |
|     | 2S  | 0.00106  | 0.00006  | -0.00308 | -0.00048 | -0.00019 | -0.00421 | -0.00318 |
|     | 2PX | 0.00356  | 0.00298  | 0.01215  | 0.01218  | -0.01298 | 0.0132   | 0.0055   |
|     | 2PY | 0.00068  | -0.0121  | 0.01811  | -0.05533 | 0.09067  | -0.00609 | 0.00788  |
|     | 2PZ | 0.0001   | 0.0141   | -0.02293 | 0.06915  | -0.11495 | 0.01129  | -0.00643 |
|     | 3S  | 0.00138  | -0.00899 | 0.0082   | 0.01868  | -0.00809 | 0.01119  | 0.00449  |
|     | 3PX | 0.00163  | 0.01379  | -0.00608 | -0.00047 | -0.01795 | -0.00092 | 0.00258  |
|     | 3PY | -0.00024 | -0.01081 | 0.01165  | -0.03377 | 0.05487  | -0.00103 | 0.01155  |
|     | 3PZ | -0.0003  | -0.00019 | -0.0073  | 0.04502  | -0.07299 | 0.00997  | -0.00244 |
|     | 4XX | -0.00012 | -0.00022 | 0.00071  | 0.00017  | -0.00035 | 0.00093  | 0.00049  |
|     | 4YY | 0.00006  | -0.00062 | 0.00207  | -0.00091 | 0.01033  | -0.00286 | -0.00106 |
|     | 4ZZ | 0.00003  | 0.00059  | -0.0018  | 0.00063  | -0.00934 | 0.00244  | 0.00096  |
|     | 4XY | -0.00014 | -0.00027 | 0.00005  | -0.00012 | 0.0047   | -0.0023  | -0.00092 |
|     | 4XZ | -0.0001  | 0.00003  | -0.00196 | -0.00081 | -0.00756 | 0.00171  | 0.00047  |
|     | 4YZ | 0.00009  | 0.00007  | -0.0005  | 0.00018  | -0.00343 | 0.00099  | 0.00036  |
| 49C | 1S  | 0.00025  | 0.0003   | -0.00307 | 0.00009  | -0.00054 | -0.00214 | -0.002   |
|     | 2S  | -0.00037 | -0.00161 | 0.00753  | -0.00023 | 0.00106  | 0.00559  | 0.00545  |
|     | 2PX | -0.00271 | -0.00131 | -0.01918 | -0.00367 | 0.00953  | -0.02003 | -0.01058 |
|     | 2PY | -0.00147 | -0.00054 | -0.00711 | -0.01729 | -0.08796 | 0.04141  | 0.01484  |
|     | 2PZ | -0.00106 | 0.00267  | 0.02969  | 0.03216  | 0.12998  | -0.03696 | -0.01074 |
|     | 3S  | -0.00176 | 0.01518  | 0.00366  | -0.00863 | 0.00372  | -0.00086 | 0.00215  |
|     | 3PX | -0.00003 | 0.0033   | -0.02012 | -0.0104  | -0.00456 | -0.02022 | -0.00631 |
|     | 3PY | 0.00018  | 0.00904  | -0.0105  | -0.01901 | -0.06373 | 0.02321  | 0.00313  |
|     | 3PZ | 0.00011  | 0.01823  | 0.00753  | 0.01633  | 0.09625  | -0.03631 | -0.0169  |
|     | 4XX | -0.00001 | 0.00037  | -0.00148 | -0.00023 | -0.00138 | -0.00124 | -0.00092 |
|     | 4YY | 0.0001   | 0.00024  | -0.00036 | 0.00012  | -0.00466 | 0.00206  | 0.00063  |
|     | 4ZZ | 0.00002  | -0.00036 | 0.00136  | -0.00018 | 0.00599  | -0.00084 | 0.00031  |
|     | 4XY | -0.00005 | -0.00083 | 0.00103  | -0.00277 | 0.00835  | -0.00145 | 0.00042  |
|     | 4XZ | -0.00003 | 0.00052  | -0.00238 | 0.00358  | -0.01045 | 0.00122  | -0.00076 |
|     | 4YZ | 0.00005  | -0.00037 | 0.00096  | 0.00045  | 0.00087  | 0.00043  | 0.00013  |
| 50H | 1S  | 0.0021   | 0.00068  | 0.01067  | 0.0127   | 0.00549  | 0.0131   | 0.00639  |
|     | 2S  | 0.0018   | -0.00099 | 0.01272  | -0.01189 | -0.0033  | 0.00045  | -0.00561 |
|     | 3PX | 0.00001  | -0.00024 | 0.0002   | 0.00023  | 0.00022  | 0.00029  | 0.00042  |
|     | 3PY | -0.00005 | 0.00004  | -0.00008 | 0.00081  | -0.00282 | 0.00063  | 0.00062  |
|     | 3PZ | -0.00007 | -0.00014 | -0.00037 | -0.0013  | 0.00334  | -0.00121 | -0.00081 |
| 51H | 1S  | -0.00332 | 0.0003   | -0.00457 | -0.00308 | -0.00088 | -0.00358 | -0.00161 |
|     | 2S  | -0.00297 | 0.00199  | -0.00832 | -0.00625 | -0.00228 | -0.00771 | -0.00505 |

|     |     |          |          |          |          |          |          |          |
|-----|-----|----------|----------|----------|----------|----------|----------|----------|
|     | 3PX | 0.00008  | 0.00002  | -0.00005 | -0.00001 | -0.00048 | 0.00008  | 0.00003  |
|     | 3PY | 0.00003  | -0.00022 | 0.00085  | -0.00054 | 0.00434  | -0.00097 | -0.00037 |
|     | 3PZ | 0.00002  | 0.00036  | -0.00096 | 0.0009   | -0.0054  | 0.00141  | 0.00047  |
| 52H | 1S  | 0.00126  | -0.00075 | 0.00063  | -0.00022 | -0.00238 | 0.00207  | 0.00197  |
|     | 2S  | 0.00167  | 0.01245  | -0.00496 | -0.00606 | 0.00464  | -0.00064 | -0.00211 |
|     | 3PX | -0.00003 | 0.00024  | -0.00086 | -0.00042 | 0.00011  | -0.00088 | -0.00024 |
|     | 3PY | 0.00003  | -0.00014 | -0.00024 | -0.00064 | -0.00231 | 0.00071  | 0.00028  |
|     | 3PZ | 0.00002  | 0.00043  | 0.0003   | 0.0007   | 0.0034   | -0.0012  | -0.00034 |
| 53C | 1S  | 0.00051  | 0.00171  | 0.0022   | 0.00008  | 0.00248  | -0.00014 | -0.00006 |
|     | 2S  | -0.00109 | -0.00509 | -0.0075  | 0.00169  | -0.00526 | -0.00253 | -0.00031 |
|     | 2PX | -0.00226 | -0.008   | -0.00683 | -0.00402 | -0.01395 | -0.00472 | -0.0045  |
|     | 2PY | -0.0002  | -0.00252 | -0.00105 | 0.00676  | -0.0045  | 0.00012  | -0.00223 |
|     | 2PZ | -0.00202 | -0.00323 | -0.00645 | 0.01302  | 0.0012   | 0.00376  | 0.00044  |
|     | 3S  | -0.00203 | -0.00491 | 0.00937  | -0.0083  | -0.01884 | 0.0214   | 0.00328  |
|     | 3PX | 0.00172  | 0.00313  | 0.01249  | -0.00968 | -0.00871 | 0.00163  | -0.00539 |
|     | 3PY | 0.00074  | -0.00208 | 0.00225  | 0.00858  | -0.00285 | -0.00055 | -0.0067  |
|     | 3PZ | 0.00077  | -0.00043 | -0.00371 | 0.018    | 0.00782  | 0.00977  | 0.00126  |
|     | 4XX | -0.00038 | -0.00082 | -0.00003 | -0.00607 | -0.00191 | -0.00131 | 0.00051  |
|     | 4YY | -0.00018 | -0.00019 | -0.00003 | 0.00017  | 0.0005   | 0.00071  | 0.00046  |
|     | 4ZZ | 0.00038  | 0.00086  | 0.00014  | 0.00559  | 0.00188  | 0.00111  | -0.00017 |
|     | 4XY | -0.00082 | -0.00106 | -0.00073 | 0.00112  | -0.00066 | 0.00102  | 0.00074  |
|     | 4XZ | 0.00016  | 0.00051  | -0.00123 | 0.00613  | 0.00172  | 0.00081  | -0.0006  |
|     | 4YZ | 0.00044  | 0.00055  | -0.00049 | 0.00719  | 0.00158  | 0.00095  | -0.00039 |
| 54C | 1S  | 0.00046  | 0.00285  | -0.00339 | -0.0008  | 0.00372  | -0.00228 | -0.00062 |
|     | 2S  | -0.00127 | -0.00712 | 0.00902  | 0.00064  | -0.01001 | 0.00585  | 0.00179  |
|     | 2PX | 0.00128  | 0.0061   | -0.0076  | 0.00398  | 0.00826  | -0.00349 | -0.00144 |
|     | 2PY | 0.00354  | 0.01517  | -0.01673 | -0.0087  | 0.01613  | -0.01131 | -0.00253 |
|     | 2PZ | -0.00095 | -0.00262 | 0.00532  | -0.01037 | -0.0072  | 0.00032  | 0.00069  |
|     | 3S  | -0.00077 | -0.01183 | 0.01257  | 0.00957  | -0.01468 | 0.01224  | 0.00303  |
|     | 3PX | -0.00017 | -0.00001 | -0.00131 | 0.00963  | 0.00776  | 0.00209  | 0.00141  |
|     | 3PY | -0.00144 | 0.00134  | -0.00043 | -0.01273 | 0.0007   | -0.00553 | -0.00112 |
|     | 3PZ | 0.00024  | 0.00161  | 0.00383  | -0.02015 | -0.00252 | -0.00139 | 0.00271  |
|     | 4XX | 0.00007  | 0.00023  | -0.00035 | -0.00055 | 0.0003   | -0.00026 | 0.00001  |
|     | 4YY | -0.00025 | -0.00108 | -0.0001  | 0.00525  | 0.00074  | 0.00089  | -0.0001  |
|     | 4ZZ | 0.00016  | 0.00125  | -0.00014 | -0.00466 | -0.00038 | -0.00101 | -0.00001 |
|     | 4XY | -0.00052 | -0.00125 | 0.00149  | -0.00219 | -0.0015  | 0.00028  | 0.00027  |
|     | 4XZ | 0.00007  | -0.00084 | -0.00081 | 0.00578  | 0.00143  | 0.00088  | 0.00003  |
|     | 4YZ | 0.00019  | -0.00081 | -0.0009  | 0.00539  | 0.00146  | 0.00083  | 0.00006  |
| 55C | 1S  | -0.00025 | 0.00023  | -0.00055 | -0.00047 | -0.00017 | -0.00075 | -0.00011 |
|     | 2S  | 0.00062  | -0.00053 | 0.00146  | 0.00079  | 0.00092  | 0.00114  | 0.00005  |
|     | 2PX | -0.00045 | 0.00024  | -0.00041 | 0.00062  | -0.00207 | 0.00086  | 0.0009   |
|     | 2PY | -0.00143 | 0.00065  | -0.00111 | -0.00028 | 0.00415  | -0.0046  | -0.00154 |
|     | 2PZ | -0.00124 | 0.00084  | -0.00294 | -0.00374 | -0.00565 | -0.00047 | 0.00069  |
|     | 3S  | 0.00034  | 0.00035  | 0.00182  | 0.00748  | 0.00099  | 0.01024  | 0.00523  |



|     |     |          |          |          |          |          |          |          |
|-----|-----|----------|----------|----------|----------|----------|----------|----------|
|     | 3PX | 0.00029  | 0.00077  | -0.0001  | 0.00041  | -0.01004 | 0.00246  | 0.00326  |
|     | 3PY | 0.00051  | -0.00031 | 0.00321  | -0.00065 | 0.01121  | -0.00556 | -0.00224 |
|     | 3PZ | 0.00048  | -0.00049 | -0.00319 | -0.00313 | -0.01    | 0.001    | -0.00082 |
|     | 4XX | -0.00017 | 0.00017  | -0.00066 | -0.00084 | -0.00087 | -0.00002 | 0.00005  |
|     | 4YY | 0.00009  | 0.00022  | -0.00094 | -0.00108 | -0.00361 | 0.00131  | 0.00049  |
|     | 4ZZ | 0.00006  | -0.00022 | 0.00146  | 0.00189  | 0.00451  | -0.00131 | -0.00048 |
|     | 4XY | -0.00008 | 0.00002  | -0.00038 | -0.00066 | 0.00049  | -0.00053 | -0.00026 |
|     | 4XZ | 0.00003  | -0.0001  | 0.0003   | 0.00031  | 0.00155  | -0.00058 | -0.00028 |
|     | 4YZ | 0.00027  | -0.00006 | 0.00026  | 0.00024  | -0.00009 | 0.0003   | 0.00009  |
| 56C | 1S  | -0.00028 | -0.00015 | -0.00195 | -0.00075 | -0.00072 | -0.00154 | -0.00077 |
|     | 2S  | 0.00075  | 0.00114  | 0.00484  | 0.00266  | 0.00068  | 0.00421  | 0.00233  |
|     | 2PX | -0.00164 | -0.00067 | -0.00792 | -0.00218 | -0.00212 | -0.0054  | -0.00253 |
|     | 2PY | 0.00096  | 0.00021  | 0.00662  | -0.00155 | 0.008    | 0.00301  | 0.00292  |
|     | 2PZ | 0.0011   | 0.00096  | 0.0052   | 0.00592  | -0.00416 | 0.0049   | 0.00112  |
|     | 3S  | 0.00064  | -0.008   | 0.01207  | 0.00185  | 0.01014  | 0.00752  | 0.00365  |
|     | 3PX | 0.00073  | 0.00152  | -0.00033 | 0.00159  | 0.00098  | -0.00165 | -0.00141 |
|     | 3PY | -0.00017 | -0.0046  | 0.00608  | -0.00568 | 0.01747  | -0.00153 | 0.00015  |
|     | 3PZ | -0.00016 | -0.00125 | 0.00163  | 0.00829  | -0.00867 | 0.00337  | -0.00044 |
|     | 4XX | -0.00004 | -0.00024 | -0.00003 | -0.00096 | 0.00046  | -0.00032 | -0.00009 |
|     | 4YY | 0.00006  | -0.00035 | 0.00054  | -0.00182 | 0.0039   | -0.00037 | 0.00034  |
|     | 4ZZ | 0        | 0.00043  | -0.00079 | 0.00268  | -0.00431 | 0.00039  | -0.00037 |
|     | 4XY | -0.00016 | 0.0002   | -0.00078 | 0.00105  | -0.00207 | 0        | -0.00021 |
|     | 4XZ | -0.00022 | -0.00046 | 0.00009  | -0.00205 | 0.00283  | -0.00055 | 0.0002   |
|     | 4YZ | 0.00019  | -0.0001  | 0.00075  | -0.00039 | 0.00132  | 0.00016  | 0.00019  |
| 57F | 1S  | 0.00005  | 0.00023  | -0.00034 | 0.00082  | -0.00112 | 0.00017  | -0.00008 |
|     | 2S  | -0.00006 | -0.00003 | 0.00013  | -0.00227 | -0.00099 | 0.00095  | 0.00088  |
|     | 2PX | 0.00315  | 0.0024   | -0.00184 | 0.00665  | -0.00139 | -0.00087 | -0.00055 |
|     | 2PY | -0.00115 | -0.00175 | -0.00024 | -0.00695 | 0.01085  | -0.00178 | 0.00073  |
|     | 2PZ | 0.00032  | -0.00384 | 0.00049  | -0.01512 | 0.01589  | -0.00087 | 0.00167  |
|     | 3S  | -0.00036 | -0.00249 | 0.00322  | -0.00446 | 0.01501  | -0.00399 | -0.00105 |
|     | 3PX | 0.00206  | 0.00151  | -0.00106 | 0.00356  | -0.00027 | -0.00072 | -0.00034 |
|     | 3PY | -0.00087 | -0.00145 | 0.00046  | -0.0054  | 0.00937  | -0.00194 | 0.00027  |
|     | 3PZ | 0.00018  | -0.00272 | 0.00054  | -0.01183 | 0.01353  | -0.00139 | 0.00114  |
|     | 4XX | 0.00004  | 0.00026  | -0.00044 | -0.00014 | -0.00157 | 0.00047  | 0.00027  |
|     | 4YY | -0.00004 | 0.00019  | -0.00019 | -0.00024 | -0.00169 | 0.00068  | 0.00034  |
|     | 4ZZ | 0.00004  | 0.00025  | -0.00026 | -0.00002 | -0.00174 | 0.00063  | 0.00028  |
|     | 4XY | 0.00006  | 0.00004  | -0.00022 | 0.00001  | 0.0001   | -0.00012 | -0.00005 |
|     | 4XZ | -0.00001 | -0.00006 | -0.00005 | -0.00042 | 0.0002   | 0.00008  | 0.00012  |
|     | 4YZ | 0.00002  | -0.00007 | 0.00006  | -0.00025 | 0.00038  | 0        | 0.00002  |
| 58F | 1S  | 0.00001  | 0.0001   | 0.00005  | 0.00074  | -0.00104 | 0.00037  | 0.00004  |
|     | 2S  | 0.00006  | -0.00084 | 0.00118  | -0.00171 | 0.0064   | -0.00163 | -0.00054 |
|     | 2PX | 0.00243  | 0.0037   | 0.0018   | 0.01419  | -0.02209 | 0.00736  | 0.00121  |
|     | 2PY | 0.00147  | -0.00004 | -0.00394 | 0.00227  | -0.00365 | -0.00121 | -0.00105 |
|     | 2PZ | -0.00101 | -0.00316 | 0.00271  | -0.01072 | 0.02586  | -0.00496 | -0.00033 |

|     |     |          |          |          |          |          |          |          |
|-----|-----|----------|----------|----------|----------|----------|----------|----------|
|     | 3S  | -0.00048 | 0.00108  | -0.00379 | -0.00498 | -0.00213 | -0.00105 | 0.00065  |
|     | 3PX | 0.00173  | 0.00218  | 0.00203  | 0.01077  | -0.01485 | 0.00524  | 0.00069  |
|     | 3PY | 0.00102  | 0.00042  | -0.00334 | 0.00274  | -0.00529 | -0.00039 | -0.00071 |
|     | 3PZ | -0.0006  | -0.0025  | 0.00229  | -0.0076  | 0.01843  | -0.00331 | -0.00014 |
|     | 4XX | -0.00001 | -0.00028 | 0.00067  | -0.00014 | 0.00228  | -0.00034 | -0.00015 |
|     | 4YY | 0.00004  | -0.0003  | 0.00065  | -0.00027 | 0.00254  | -0.00054 | -0.00022 |
|     | 4ZZ | 0.00005  | -0.0001  | 0.00026  | 0.00051  | 0.00033  | -0.00016 | -0.00022 |
|     | 4XY | -0.00007 | -0.00006 | 0.00002  | -0.00024 | 0.00043  | -0.00016 | -0.00008 |
|     | 4XZ | -0.00002 | 0.00005  | -0.0001  | -0.00014 | 0.00033  | -0.00018 | -0.00004 |
|     | 4YZ | -0.00002 | -0.00004 | 0.00001  | -0.00001 | -0.00015 | 0.00003  | 0        |
| 59F | 1S  | 0.00003  | -0.0002  | 0.00049  | -0.00142 | 0.00247  | -0.00015 | 0.00028  |
|     | 2S  | -0.00001 | 0.0001   | -0.00079 | 0.00271  | -0.00408 | -0.00028 | -0.00092 |
|     | 2PX | 0.00104  | -0.00344 | 0.00815  | -0.01786 | 0.02407  | 0.00135  | 0.00274  |
|     | 2PY | -0.00228 | 0.00324  | -0.00897 | 0.01088  | -0.02453 | 0.00122  | -0.00079 |
|     | 2PZ | -0.00194 | 0.00315  | -0.0104  | 0.01523  | -0.0311  | 0.00095  | -0.00257 |
|     | 3S  | -0.00038 | 0.00234  | -0.00423 | 0.01029  | -0.01965 | 0.00225  | -0.00128 |
|     | 3PX | 0.00068  | -0.0024  | 0.0057   | -0.01295 | 0.01763  | 0.00062  | 0.00188  |
|     | 3PY | -0.00155 | 0.00235  | -0.00646 | 0.00686  | -0.01612 | 0.00055  | -0.00049 |
|     | 3PZ | -0.0014  | 0.0027   | -0.00794 | 0.01243  | -0.02543 | 0.00098  | -0.00207 |
|     | 4XX | 0.00004  | -0.00017 | 0.00013  | -0.00044 | 0.00045  | -0.00012 | 0        |
|     | 4YY | 0.00007  | -0.00032 | 0.00049  | -0.00061 | 0.00192  | -0.00051 | -0.00019 |
|     | 4ZZ | -0.00005 | -0.00001 | -0.00007 | 0.00016  | -0.00009 | -0.00019 | -0.00009 |
|     | 4XY | 0        | 0.0001   | -0.00012 | 0.00048  | -0.00066 | 0.00004  | -0.00005 |
|     | 4XZ | 0        | 0.00002  | -0.00015 | -0.0002  | -0.00007 | -0.00003 | -0.00005 |
|     | 4YZ | -0.00003 | 0.00005  | 0.00001  | -0.00001 | 0.00021  | -0.00001 | 0.00005  |
| 60F | 1S  | 0        | -0.00005 | 0.00046  | 0.00047  | 0.00115  | -0.00008 | 0.00004  |
|     | 2S  | 0.00001  | 0.00057  | -0.0015  | -0.00039 | -0.00675 | 0.00157  | 0.00094  |
|     | 2PX | 0.00235  | -0.00108 | 0.00656  | 0.00613  | 0.01335  | -0.00163 | -0.00059 |
|     | 2PY | 0.0005   | -0.00138 | 0.00581  | 0.00435  | 0.01046  | 0.00066  | 0.00019  |
|     | 2PZ | 0.00213  | -0.00274 | 0.01115  | 0.00525  | 0.03042  | -0.00604 | -0.00192 |
|     | 3S  | -0.00028 | -0.00076 | -0.00228 | -0.00441 | 0.00157  | -0.00274 | -0.00279 |
|     | 3PX | 0.00164  | -0.00058 | 0.00512  | 0.00508  | 0.01046  | -0.00102 | -0.00011 |
|     | 3PY | 0.00035  | -0.00076 | 0.00373  | 0.00362  | 0.00499  | 0.00158  | 0.0007   |
|     | 3PZ | 0.0014   | -0.00189 | 0.00778  | 0.00397  | 0.02157  | -0.00434 | -0.00153 |
|     | 4XX | -0.00007 | 0.00021  | -0.00047 | 0.00022  | -0.00272 | 0.00075  | 0.00045  |
|     | 4YY | 0.00005  | 0.0002   | -0.00023 | 0.00035  | -0.00214 | 0.00075  | 0.00051  |
|     | 4ZZ | 0.00004  | 0.00011  | 0.00015  | 0.00043  | -0.00047 | 0.00026  | 0.0003   |
|     | 4XY | -0.00001 | -0.00002 | 0.00001  | -0.00003 | 0.00015  | -0.00009 | -0.00004 |
|     | 4XZ | -0.00002 | 0.00004  | -0.00016 | -0.00001 | -0.0004  | 0.0001   | 0.00002  |
|     | 4YZ | -0.00001 | -0.00001 | 0.00006  | 0.00002  | 0.00026  | -0.00001 | 0        |
| 61F | 1S  | 0.00004  | -0.00003 | 0.00042  | 0.00037  | 0.00104  | -0.00021 | -0.00013 |
|     | 2S  | -0.00003 | 0.00005  | -0.0006  | -0.0023  | 0.00172  | -0.00059 | -0.00071 |
|     | 2PX | 0.00161  | 0.00042  | 0.00094  | 0.00092  | -0.00702 | 0.00393  | 0.00184  |
|     | 2PY | 0.00219  | -0.00074 | 0.00404  | 0.00439  | 0.00653  | -0.00096 | -0.0002  |

|     |     |          |          |          |          |          |          |          |
|-----|-----|----------|----------|----------|----------|----------|----------|----------|
|     | 2PZ | 0.00026  | -0.00135 | 0.00808  | 0.01091  | 0.01105  | -0.00237 | -0.00009 |
|     | 3S  | -0.00035 | 0.00047  | -0.00328 | 0.00035  | -0.01591 | 0.00365  | 0.00305  |
|     | 3PX | 0.00099  | 0.00042  | -0.00012 | 0.00012  | -0.00733 | 0.003    | 0.00127  |
|     | 3PY | 0.00151  | -0.00057 | 0.00289  | 0.00258  | 0.00597  | -0.00094 | -0.00066 |
|     | 3PZ | 0.00016  | -0.00083 | 0.00612  | 0.00745  | 0.00978  | -0.00223 | -0.00019 |
|     | 4XX | 0.00005  | 0        | 0.00015  | -0.00073 | 0.00165  | -0.00044 | -0.00047 |
|     | 4YY | -0.00005 | 0        | 0.00012  | -0.00078 | 0.00198  | -0.00055 | -0.00047 |
|     | 4ZZ | 0.00004  | 0        | 0.00025  | -0.00042 | 0.0019   | -0.00055 | -0.00046 |
|     | 4XY | 0.00002  | -0.00001 | 0.00006  | 0.00008  | 0.00005  | 0.0001   | 0.00009  |
|     | 4XZ | 0        | -0.00001 | 0.00023  | 0.00031  | 0.00013  | -0.00001 | 0.00009  |
|     | 4YZ | 0.00001  | -0.00001 | -0.00007 | 0.00012  | -0.00017 | 0.00008  | 0.00001  |
| 62F | 1S  | 0.00003  | 0.00004  | -0.00051 | -0.00062 | -0.00206 | 0.00077  | 0.00026  |
|     | 2S  | 0        | -0.00033 | 0.00116  | 0.00194  | 0.00384  | -0.00128 | -0.00055 |
|     | 2PX | -0.00101 | -0.00022 | -0.00236 | -0.00618 | 0.00169  | -0.00079 | -0.00073 |
|     | 2PY | 0.00184  | 0.00181  | -0.01077 | -0.00856 | -0.02644 | 0.00719  | 0.00131  |
|     | 2PZ | 0.00182  | 0.00132  | -0.00878 | -0.009   | -0.02896 | 0.00949  | 0.00263  |
|     | 3S  | -0.00044 | 0.00024  | 0.00348  | 0.00227  | 0.01539  | -0.00625 | -0.00186 |
|     | 3PX | -0.0007  | -0.00031 | -0.00186 | -0.0043  | 0.001    | -0.00055 | -0.00077 |
|     | 3PY | 0.00122  | 0.00124  | -0.00721 | -0.00607 | -0.01771 | 0.0047   | 0.00084  |
|     | 3PZ | 0.00133  | 0.00086  | -0.00665 | -0.00657 | -0.02311 | 0.008    | 0.0023   |
|     | 4XX | 0.00005  | -0.00011 | 0.00008  | 0.00016  | -0.00011 | 0.00012  | 0        |
|     | 4YY | 0.00007  | -0.00003 | -0.00039 | -0.00011 | -0.00153 | 0.00051  | 0.00012  |
|     | 4ZZ | -0.00003 | -0.00014 | 0.00026  | 0.00036  | 0.00028  | 0.00004  | 0.00003  |
|     | 4XY | -0.00001 | -0.00004 | 0.00001  | -0.00024 | 0.00064  | -0.00016 | -0.00012 |
|     | 4XZ | 0.00003  | 0.00003  | 0.00005  | 0.00005  | -0.00001 | 0.00002  | 0.00004  |
|     | 4YZ | -0.00001 | -0.00001 | 0.00007  | 0.00009  | -0.00023 | 0.0002   | 0.0001   |
| 63F | 1S  | -0.00005 | 0.00003  | 0.0005   | -0.00232 | -0.00047 | -0.00032 | 0.00009  |
|     | 2S  | -0.00003 | -0.00057 | -0.00126 | 0.00896  | 0.00237  | 0.00217  | 0.00063  |
|     | 2PX | 0.00203  | 0.00416  | 0.00991  | -0.03757 | -0.01362 | -0.00397 | 0.00009  |
|     | 2PY | -0.00509 | 0.00066  | 0.0129   | -0.03617 | -0.00982 | -0.00403 | 0.00001  |
|     | 2PZ | -0.00109 | -0.003   | -0.00658 | 0.02675  | 0.00635  | 0.00357  | 0.00005  |
|     | 3S  | 0.0007   | 0.00119  | -0.0037  | 0.00706  | 0.0004   | -0.00153 | -0.00278 |
|     | 3PX | 0.00122  | 0.00266  | 0.00781  | -0.02919 | -0.01012 | -0.00287 | 0.0006   |
|     | 3PY | -0.00341 | 0.00039  | 0.00865  | -0.02282 | -0.00637 | -0.00213 | 0.00031  |
|     | 3PZ | -0.00086 | -0.00258 | -0.00403 | 0.01882  | 0.00467  | 0.00295  | 0.00046  |
|     | 4XX | -0.00014 | -0.00033 | -0.00035 | 0.00281  | 0.00081  | 0.0008   | 0.00035  |
|     | 4YY | 0.00001  | -0.00029 | 0.00001  | 0.00147  | 0.00049  | 0.00061  | 0.00034  |
|     | 4ZZ | -0.00001 | 0.00014  | 0.00007  | 0.0002   | 0.00027  | 0.00031  | 0.00029  |
|     | 4XY | 0.00001  | -0.00008 | 0.00013  | -0.00025 | -0.00037 | 0.00004  | -0.00001 |
|     | 4XZ | 0.00003  | 0.00009  | -0.00017 | 0.0005   | 0.00022  | 0.00004  | -0.00003 |
|     | 4YZ | 0.00011  | -0.0001  | -0.00018 | 0.00114  | 0.0001   | 0.00025  | 0        |
| 64F | 1S  | 0        | -0.00019 | 0.00042  | -0.00162 | -0.00084 | -0.00012 | 0.00001  |
|     | 2S  | -0.0001  | -0.00016 | -0.00038 | 0.00261  | 0.00056  | -0.00026 | -0.00049 |
|     | 2PX | 0.00205  | 0.00122  | 0.00039  | -0.00172 | -0.00136 | -0.00004 | -0.00033 |

|     |     |          |          |          |          |          |          |          |
|-----|-----|----------|----------|----------|----------|----------|----------|----------|
|     | 2PY | -0.00199 | -0.0087  | 0.0143   | -0.02274 | -0.0159  | 0.00244  | 0.00135  |
|     | 2PZ | 0.00434  | -0.00369 | -0.0081  | 0.03076  | 0.00823  | 0.00203  | -0.00092 |
|     | 3S  | 0.0006   | 0.00301  | -0.00454 | 0.01281  | 0.00887  | 0.00181  | 0.00101  |
|     | 3PX | 0.00156  | 0.00107  | -0.00026 | 0.00064  | 0.00006  | 0.00034  | -0.00002 |
|     | 3PY | -0.00136 | -0.00666 | 0.01051  | -0.01656 | -0.01227 | 0.00163  | 0.00067  |
|     | 3PZ | 0.00297  | -0.00272 | -0.00636 | 0.02499  | 0.00625  | 0.00184  | -0.00092 |
|     | 4XX | 0.00006  | -0.00005 | 0.00013  | -0.00078 | -0.00049 | -0.00037 | -0.00024 |
|     | 4YY | -0.00011 | -0.00041 | 0.00042  | -0.00047 | -0.00075 | -0.00006 | -0.00008 |
|     | 4ZZ | -0.00005 | -0.00029 | 0.00027  | -0.00055 | -0.00059 | -0.00025 | -0.00019 |
|     | 4XY | -0.00006 | -0.00008 | 0.00009  | -0.00028 | -0.00012 | -0.00006 | -0.00007 |
|     | 4XZ | 0.0001   | -0.00019 | -0.00022 | 0.00109  | 0.00014  | 0.00006  | -0.00009 |
|     | 4YZ | -0.00007 | 0.00004  | 0.00003  | -0.00009 | 0.00009  | -0.00005 | -0.00002 |
| 65F | 1S  | -0.00005 | -0.00079 | -0.00015 | 0.00415  | 0.00055  | 0.00088  | 0        |
|     | 2S  | 0.00005  | 0.00167  | 0.00053  | -0.00908 | -0.00135 | -0.002   | -0.00027 |
|     | 2PX | -0.0047  | -0.01237 | 0.00264  | 0.02768  | -0.00083 | 0.00618  | 0.00016  |
|     | 2PY | -0.00622 | -0.02243 | -0.00297 | 0.07392  | 0.00813  | 0.01376  | 0.00073  |
|     | 2PZ | -0.00073 | 0.00587  | -0.00011 | -0.02878 | -0.00374 | -0.0065  | -0.00045 |
|     | 3S  | 0.00058  | 0.00562  | 0.00041  | -0.02793 | -0.0029  | -0.00593 | 0.0007   |
|     | 3PX | -0.0033  | -0.00914 | 0.0016   | 0.02236  | -0.00083 | 0.00482  | -0.00028 |
|     | 3PY | -0.00419 | -0.01561 | -0.00181 | 0.05187  | 0.00562  | 0.00987  | 0.00063  |
|     | 3PZ | -0.0004  | 0.00484  | 0.00004  | -0.02465 | -0.00335 | -0.00563 | -0.00034 |
|     | 4XX | 0.00008  | 0.00007  | 0.00017  | -0.00036 | -0.00002 | -0.00005 | -0.00006 |
|     | 4YY | -0.00008 | -0.00041 | -0.00008 | 0.00212  | 0.00038  | 0.00036  | -0.00011 |
|     | 4ZZ | -0.00007 | 0.00005  | 0.00012  | -0.00067 | -0.00025 | -0.00022 | -0.00017 |
|     | 4XY | 0.00006  | -0.00006 | 0.00024  | -0.00039 | -0.00033 | 0.00001  | -0.00001 |
|     | 4XZ | -0.0001  | -0.0002  | -0.00001 | 0.00044  | -0.00002 | 0        | -0.00008 |
|     | 4YZ | -0.00011 | -0.00023 | -0.00028 | 0.00099  | 0.00029  | -0.00001 | -0.00004 |
| 66F | 1S  | -0.00004 | -0.00025 | -0.00057 | 0.00134  | -0.00019 | 0.00063  | 0.00033  |
|     | 2S  | -0.00022 | -0.00098 | 0.00037  | -0.00372 | -0.00009 | -0.00101 | -0.00059 |
|     | 2PX | 0.00322  | 0.00473  | 0.00613  | -0.01851 | 0.0075   | -0.00485 | -0.00012 |
|     | 2PY | -0.00236 | -0.00227 | 0.00194  | -0.00468 | 0.00001  | 0.00063  | 0.00222  |
|     | 2PZ | -0.00258 | 0.00095  | 0.00982  | -0.03771 | -0.00974 | -0.00945 | -0.0016  |
|     | 3S  | 0.00123  | 0.00535  | 0.00482  | -0.00727 | 0.00296  | -0.00499 | -0.00179 |
|     | 3PX | 0.00222  | 0.00385  | 0.00367  | -0.0126  | 0.00656  | -0.00405 | -0.00005 |
|     | 3PY | -0.002   | -0.00248 | 0.00014  | -0.00255 | -0.00014 | 0.00178  | 0.00247  |
|     | 3PZ | -0.00164 | 0.00118  | 0.00811  | -0.02916 | -0.00799 | -0.00812 | -0.00154 |
|     | 4XX | -0.00016 | -0.00085 | -0.00057 | -0.00034 | -0.00027 | 0.00019  | 0.00015  |
|     | 4YY | -0.00001 | -0.00045 | -0.00042 | 0.00014  | -0.00005 | 0.00014  | 0.00001  |
|     | 4ZZ | -0.0002  | -0.00067 | -0.0004  | -0.0003  | -0.0002  | 0.00019  | 0.00013  |
|     | 4XY | -0.0001  | -0.00008 | -0.00002 | 0.0001   | -0.00019 | 0.00023  | 0.00013  |
|     | 4XZ | -0.00008 | 0.00007  | 0.0001   | 0.0001   | -0.00004 | 0.00004  | -0.00002 |
|     | 4YZ | 0.00003  | 0.00003  | -0.00035 | 0.00117  | 0.00047  | 0.00046  | 0.00011  |
| 67F | 1S  | -0.00008 | -0.00006 | 0.00055  | -0.00462 | -0.00176 | -0.00089 | 0.00021  |
|     | 2S  | 0.00027  | 0.00087  | 0.00047  | 0.01158  | 0.00358  | 0.00248  | -0.00096 |

|     |     |          |          |          |          |          |          |          |
|-----|-----|----------|----------|----------|----------|----------|----------|----------|
|     | 2PX | 0.00065  | 0.00363  | -0.01548 | 0.07737  | 0.02918  | 0.01528  | 0.00139  |
|     | 2PY | -0.00632 | 0.00681  | -0.00495 | 0.03118  | 0.01426  | 0.00876  | 0.00182  |
|     | 2PZ | 0.00937  | 0.00373  | 0.00205  | 0.0363   | 0.01066  | 0.00537  | -0.00226 |
|     | 3S  | 0.00083  | -0.00076 | -0.00697 | 0.02691  | 0.0123   | 0.00404  | -0.00087 |
|     | 3PX | 0.00026  | 0.00224  | -0.01171 | 0.05353  | 0.02043  | 0.01112  | 0.00238  |
|     | 3PY | -0.00421 | 0.00468  | -0.0049  | 0.02464  | 0.01213  | 0.0071   | 0.00189  |
|     | 3PZ | 0.00659  | 0.002    | 0.00002  | 0.02931  | 0.00917  | 0.00374  | -0.00197 |
|     | 4XX | -0.00001 | 0.00029  | 0.00114  | -0.00182 | -0.00091 | -0.00016 | -0.0001  |
|     | 4YY | -0.00022 | 0.00038  | 0.00053  | 0.0009   | 0.00008  | 0.00031  | -0.00018 |
|     | 4ZZ | 0.00038  | 0.00016  | 0.00058  | 0.00129  | 0.00007  | 0.00013  | -0.00032 |
|     | 4XY | -0.00011 | -0.00032 | -0.0003  | 0.00025  | -0.00005 | -0.00003 | 0        |
|     | 4XZ | 0        | -0.00008 | -0.0004  | 0.00082  | 0.00022  | 0.00021  | 0.00015  |
|     | 4YZ | -0.00002 | 0.00008  | -0.0002  | 0.00051  | 0.00028  | 0.00011  | 0.00005  |
| 68F | 1S  | -0.00029 | -0.00043 | -0.00142 | 0.00249  | 0.00104  | 0.00142  | 0.00114  |
|     | 2S  | 0.00102  | 0.00268  | 0.00723  | -0.00726 | -0.00385 | -0.00437 | -0.00726 |
|     | 2PX | 0.00321  | 0.00539  | 0.01911  | -0.04536 | -0.01213 | -0.00836 | -0.0063  |
|     | 2PY | 0.00794  | 0.00122  | 0.01871  | -0.04034 | -0.01179 | -0.00736 | 0.00136  |
|     | 2PZ | 0.01449  | 0.00849  | 0.02347  | -0.02321 | -0.01077 | -0.01079 | -0.00998 |
|     | 3S  | 0.00091  | -0.00076 | 0.00133  | -0.01163 | -0.00375 | -0.00812 | 0.00072  |
|     | 3PX | 0.00255  | 0.00319  | 0.01235  | -0.03012 | -0.0083  | -0.00774 | -0.00311 |
|     | 3PY | 0.00586  | 0.00171  | 0.0145   | -0.03045 | -0.00945 | -0.00769 | -0.00133 |
|     | 3PZ | 0.00845  | 0.00384  | 0.01111  | -0.01836 | -0.00568 | -0.00289 | -0.00025 |
|     | 4XX | 0.00038  | 0.001    | 0.00236  | -0.00026 | -0.00097 | -0.00101 | -0.00262 |
|     | 4YY | 0.00072  | 0.00118  | 0.00304  | -0.00127 | -0.00124 | -0.00129 | -0.00281 |
|     | 4ZZ | -0.00024 | 0.00044  | 0.00049  | 0.00066  | 0.0001   | -0.00012 | -0.00136 |
|     | 4XY | 0.00023  | 0.00007  | 0.00017  | 0.00019  | -0.00015 | -0.00031 | -0.00034 |
|     | 4XZ | 0.00008  | -0.00016 | -0.00049 | 0.00104  | 0.00041  | 0.00033  | 0.00092  |
|     | 4YZ | 0        | -0.00006 | -0.00022 | 0.00045  | 0.00012  | 0.00038  | -0.00011 |
| 69C | 1S  | 0.00006  | 0.01012  | -0.00069 | 0.00016  | -0.00017 | 0        | -0.00013 |
|     | 2S  | -0.00035 | -0.02068 | 0.00168  | -0.00026 | 0.00026  | 0.00004  | -0.00014 |
|     | 2PX | 0.12098  | -0.02738 | -0.0116  | -0.00907 | 0.0067   | 0.02303  | -0.01501 |
|     | 2PY | -0.08385 | -0.13717 | 0.01943  | 0.00395  | -0.00368 | -0.01244 | 0.009    |
|     | 2PZ | 0.39586  | -0.03696 | -0.05413 | -0.03169 | 0.02235  | 0.07917  | -0.05399 |
|     | 3S  | 0.0002   | -0.06099 | 0.0023   | -0.00085 | 0.0022   | -0.00049 | 0.00325  |
|     | 3PX | 0.05363  | -0.02221 | -0.00288 | -0.00332 | 0.00246  | 0.00848  | -0.00823 |
|     | 3PY | -0.03654 | -0.07383 | 0.00912  | 0.00123  | -0.00127 | -0.00414 | 0.00521  |
|     | 3PZ | 0.17241  | -0.01282 | -0.01638 | -0.01011 | 0.0067   | 0.0265   | -0.03533 |
|     | 4XX | -0.00788 | -0.00053 | 0.00222  | 0.00162  | -0.0011  | -0.00496 | 0.00578  |
|     | 4YY | -0.00035 | 0.00315  | -0.0005  | -0.00038 | 0.00028  | 0.00163  | -0.00248 |
|     | 4ZZ | 0.00834  | -0.00002 | -0.00191 | -0.00117 | 0.00085  | 0.00331  | -0.0034  |
|     | 4XY | 0.00281  | -0.00652 | 0.00002  | -0.00021 | 0.00017  | 0.00012  | 0.00042  |
|     | 4XZ | -0.01575 | 0.00099  | 0.00449  | 0.0032   | -0.0023  | -0.00973 | 0.01161  |
|     | 4YZ | 0.00231  | 0.0029   | 0.00166  | 0.00161  | -0.00118 | -0.00557 | 0.00883  |
| 70H | 1S  | 0.01458  | 0.06832  | -0.00382 | 0.0005   | 0.00001  | 0.00078  | -0.00042 |

|     |     |          |          |          |          |          |          |          |
|-----|-----|----------|----------|----------|----------|----------|----------|----------|
|     | 2S  | 0.01208  | 0.07526  | -0.00211 | 0.00103  | -0.00118 | 0.00122  | -0.00295 |
|     | 3PX | 0.00198  | -0.00249 | -0.00005 | -0.00017 | 0.00009  | 0.00049  | -0.0004  |
|     | 3PY | -0.00098 | 0.00015  | 0.00024  | 0.00011  | -0.00008 | -0.00026 | 0.00021  |
|     | 3PZ | 0.00804  | 0.00028  | -0.0011  | -0.00061 | 0.00045  | 0.00166  | -0.00155 |
| 71H | 1S  | 0.21379  | -0.01502 | -0.0375  | -0.02312 | 0.0165   | 0.06281  | -0.05961 |
|     | 2S  | 0.18817  | -0.01392 | -0.04381 | -0.02876 | 0.02055  | 0.08235  | -0.08441 |
|     | 3PX | 0.00696  | -0.00054 | -0.00087 | -0.00048 | 0.00034  | 0.00102  | 0.00015  |
|     | 3PY | 0.00063  | -0.0025  | 0.00031  | 0.00015  | -0.00013 | -0.0007  | 0.00153  |
|     | 3PZ | -0.00339 | -0.00008 | 0.00057  | 0.00031  | -0.00021 | -0.00076 | 0.00042  |
| 72H | 1S  | -0.22258 | 0.01158  | 0.03592  | 0.02315  | -0.01657 | -0.06416 | 0.05998  |
|     | 2S  | -0.19446 | 0.01619  | 0.0415   | 0.02877  | -0.02075 | -0.08334 | 0.08496  |
|     | 3PX | -0.00769 | 0.00015  | 0.00106  | 0.00054  | -0.00039 | -0.00118 | -0.00007 |
|     | 3PY | -0.00086 | -0.00257 | -0.00001 | -0.00024 | 0.00015  | 0.00085  | -0.00158 |
|     | 3PZ | -0.00008 | -0.00044 | -0.00007 | -0.00003 | 0.00001  | 0.00003  | 0.00004  |
| 73H | 1S  | -0.0011  | 0.1005   | -0.00425 | 0.00163  | -0.0017  | 0.00101  | 0.00001  |
|     | 2S  | -0.00169 | 0.11338  | -0.00411 | 0.00163  | -0.00296 | 0.00164  | -0.00034 |
|     | 3PX | 0.00111  | 0.00225  | 0.00024  | 0.00038  | -0.00028 | -0.00143 | 0.00214  |
|     | 3PY | -0.00033 | -0.00152 | -0.00023 | -0.00024 | 0.00021  | 0.00082  | -0.00127 |
|     | 3PZ | 0.00295  | -0.00031 | 0.00162  | 0.00141  | -0.00104 | -0.005   | 0.00757  |

### 3.4.2 Combined coefficients and computational details of HFV index (F) of M1c

**Table S9.** Combined coefficients  $|c_{ki}| / |c_{kj}|$  after normalization of the  $i$  and  $j$  atoms in the  $k_{th}$  occupied  $\pi$ -type molecular orbital of M1c

| $i/j \backslash c_{ki} /  c_{kj} $ | $k$ | 143    | 160    | 162    | 166    | 167    | 169    | 170    |
|------------------------------------|-----|--------|--------|--------|--------|--------|--------|--------|
| 13                                 |     | 0.0386 | 0.1839 | 0.4002 | 0.0819 | 0.0400 | 0.1914 | 0.3277 |
| 14                                 |     | 0.0679 | 0.2477 | 0.3530 | 0.1599 | 0.1039 | 0.1841 | 0.4275 |
| 17                                 |     | 0.1307 | 0.1933 | 0.2486 | 0.1692 | 0.1174 | 0.4403 | 0.2372 |
| 18                                 |     | 0.2600 | 0.1972 | 0.1114 | 0.1010 | 0.0698 | 0.3295 | 0.4501 |
| 69                                 |     | 0.7072 | 0.2279 | 0.0838 | 0.0465 | 0.0318 | 0.1110 | 0.0796 |

**Table S10.** The calculation details of HFV index (F) of M1c

| Active site   | $\pi$ Bond | $\pi$ -Type molecular orbitals with $\delta_k$ in parentheses | $\pi$ Bond order (P) | $\Sigma P$ | HFV (F) |
|---------------|------------|---------------------------------------------------------------|----------------------|------------|---------|
| $\alpha$ (14) | 14-13      | 160 (1),162 (1),166 (1),167 (1),169 (-1),170 (1)              | 0.62 <sup>a</sup>    | 0.85       | 0.91    |
|               | 14-17      | 143 (1),162 (1),166 (1),167 (1),169 (1),170 (-1)              | 0.23 <sup>b</sup>    |            |         |
| $\gamma$ (18) | 18-17      | 143 (1),160 (-1),162 (1),166 (1),167 (1),169 (1),170 (1)      | 0.60 <sup>c</sup>    | 0.79       | 0.97    |
|               | 18-69      | 143 (1),162 (-1),166 (-1),167 (-1),169 (-1),170 (-1)          | 0.19 <sup>d</sup>    |            |         |

a :  $P_{14-13} = 2 \times 0.2477 \times 0.1839 + 2 \times 0.3530 \times 0.4002 + 2 \times 0.1599 \times 0.0819 + 2 \times 0.1039 \times 0.0400 - 2 \times 0.1841 \times 0.1914 + 2 \times 0.4275 \times 0.3277 = 0.62$

b :  $P_{14-17} = 2 \times 0.0679 \times 0.1307 + 2 \times 0.3530 \times 0.2486 + 2 \times 0.1599 \times 0.1692 + 2 \times 0.1039 \times 0.1174 + 2 \times 0.1841 \times 0.4403 - 2 \times 0.4275 \times 0.2372 = 0.23$

c :  $P_{18-17} = 2 \times 0.2600 \times 0.1307 + 2 \times 0.1972 \times 0.1933 + 2 \times 0.1114 \times 0.2486 + 2 \times 0.1010 \times 0.1692 + 2 \times 0.0698 \times 0.1174 + 2 \times 0.3295 \times 0.4403 + 2 \times 0.4501 \times 0.2372 = 0.60$

d :  $P_{18-69} = 2 \times 0.2600 \times 0.7072 - 2 \times 0.1114 \times 0.0838 + 2 \times 0.1010 \times 0.0465 + 2 \times 0.0698 \times 0.0318 + 2 \times 0.3295 \times 0.1110 + 2 \times 0.4501 \times 0.0796 = 0.19$

### 3.5 The occupied $\pi$ -type molecular orbitals associated with the active sites of **1d**

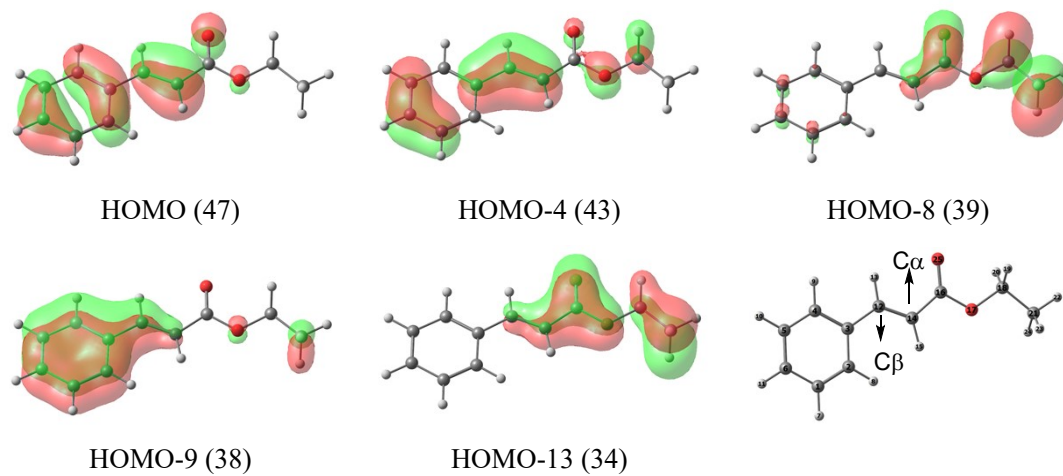

**Fig. S8.** The occupied  $\pi$ -type molecular orbitals associated with the active sites of **1d**



### 3.5.1 Molecular orbital coefficients of 1d

|     |     | 34       | 38       | 39       | 43       | 47       |
|-----|-----|----------|----------|----------|----------|----------|
| 1C  | 1S  | 0.00001  | 0.00004  | 0        | 0        | 0        |
|     | 2S  | -0.00002 | -0.00008 | 0        | -0.00001 | 0        |
|     | 2PX | -0.00001 | -0.00021 | -0.00015 | 0.00004  | -0.00001 |
|     | 2PY | 0.00006  | -0.00026 | -0.00002 | -0.00001 | 0.00002  |
|     | 2PZ | 0.01354  | 0.18571  | -0.0569  | -0.1673  | 0.09149  |
|     | 3S  | -0.00004 | -0.00023 | 0        | -0.00003 | -0.00001 |
|     | 3PX | 0.00001  | 0.00005  | -0.00005 | 0.00004  | 0        |
|     | 3PY | 0.00002  | -0.00003 | -0.00001 | -0.00002 | 0        |
|     | 3PZ | 0.00597  | 0.10374  | -0.03486 | -0.11549 | 0.06288  |
|     | 4XX | 0        | 0.00004  | 0.00001  | 0        | 0        |
|     | 4YY | 0        | -0.00005 | -0.00001 | 0        | 0        |
|     | 4ZZ | 0        | 0.00001  | 0        | 0        | 0.00001  |
|     | 4XY | 0        | 0.00001  | 0        | 0        | 0        |
|     | 4XZ | -0.00041 | -0.00306 | 0.00033  | -0.0057  | 0.01381  |
|     | 4YZ | -0.00063 | -0.0084  | 0.00251  | 0.00686  | -0.00435 |
|     | 2C  | 1S       | -0.00001 | -0.00008 | 0        | -0.00001 |
| 2S  |     | 0.00001  | 0.00016  | 0.00001  | 0.00002  | 0.00001  |
| 2PX |     | -0.00001 | 0.00027  | 0.00016  | -0.00002 | 0.00002  |
| 2PY |     | -0.00001 | -0.00005 | 0.00002  | -0.00004 | -0.00004 |
| 2PZ |     | 0.02177  | 0.20989  | -0.04746 | 0.00555  | -0.17868 |
| 3S  |     | 0.00001  | 0.00033  | -0.00002 | 0.00005  | 0.00001  |
| 3PX |     | 0.00001  | 0.00015  | 0.00004  | 0        | 0.00002  |
| 3PY |     | 0.00002  | -0.00002 | 0.00004  | 0.00001  | 0.00001  |
| 3PZ |     | 0.01382  | 0.12172  | -0.02552 | 0.01195  | -0.1283  |
| 4XX |     | 0        | -0.00001 | 0        | 0        | 0        |
| 4YY |     | 0        | -0.00001 | -0.00001 | 0        | 0        |
| 4ZZ |     | 0        | 0        | 0        | 0        | 0        |
| 4XY |     | 0        | -0.00002 | 0.00001  | 0        | 0        |
| 4XZ |     | 0.00001  | 0.00526  | -0.00226 | -0.00923 | 0.00432  |
| 4YZ |     | -0.00132 | -0.00817 | 0.00093  | -0.0071  | 0.01031  |
| 3C  |     | 1S       | 0        | 0.00008  | 0        | 0        |
|     | 2S  | -0.00001 | -0.00018 | -0.00001 | 0        | 0        |
|     | 2PX | 0.00007  | 0.00051  | -0.00011 | -0.00004 | 0.00002  |
|     | 2PY | 0.00003  | 0.00008  | -0.00002 | 0.00008  | -0.00004 |
|     | 2PZ | 0.04125  | 0.25753  | -0.03218 | 0.18707  | -0.24754 |
|     | 3S  | 0        | -0.00032 | 0.00002  | 0.00002  | 0.00003  |
|     | 3PX | 0.00002  | 0.00034  | 0.00002  | -0.00003 | 0.00003  |
|     | 3PY | 0.00003  | 0.00002  | 0.00002  | 0.00004  | -0.00001 |
|     | 3PZ | 0.01841  | 0.1431   | -0.02323 | 0.1123   | -0.17083 |
|     | 4XX | 0        | 0.00001  | 0.00001  | 0        | 0        |
|     | 4YY | 0        | 0.00001  | -0.00001 | 0        | 0        |
|     | 4ZZ | 0        | 0.00001  | 0        | 0        | 0        |

|    |     |          |          |          |          |          |
|----|-----|----------|----------|----------|----------|----------|
|    | 4XY | 0        | 0.00003  | 0.00001  | 0        | 0        |
|    | 4XZ | -0.00121 | 0.00413  | -0.00326 | -0.0107  | -0.01241 |
|    | 4YZ | -0.00027 | 0.00086  | -0.00076 | -0.00317 | -0.00302 |
| 4C | 1S  | -0.00001 | 0.00001  | -0.00001 | 0.00001  | 0        |
|    | 2S  | 0.00002  | 0.00001  | 0.00001  | -0.00002 | -0.00001 |
|    | 2PX | 0.00002  | 0.0006   | 0.00016  | 0.00004  | 0.00004  |
|    | 2PY | 0.00007  | 0.00079  | 0        | -0.00002 | -0.00003 |
|    | 2PZ | 0.02136  | 0.20971  | -0.04798 | 0.00471  | -0.16639 |
|    | 3S  | 0.00004  | -0.00016 | 0        | -0.00003 | -0.00002 |
|    | 3PX | 0.00001  | 0.00017  | 0.00005  | 0        | 0.00002  |
|    | 3PY | 0.00003  | 0.00018  | -0.00002 | -0.00001 | -0.00003 |
|    | 3PZ | 0.0125   | 0.12171  | -0.02738 | 0.00722  | -0.12983 |
|    | 4XX | 0        | 0.00002  | 0        | 0        | 0        |
|    | 4YY | 0        | -0.00004 | -0.00001 | 0        | 0        |
|    | 4ZZ | 0        | 0        | 0        | 0        | 0        |
|    | 4XY | 0        | -0.00003 | 0        | 0        | 0        |
|    | 4XZ | -0.00064 | -0.00001 | -0.00134 | -0.0116  | 0.01041  |
|    | 4YZ | 0.00114  | 0.00967  | -0.00196 | 0.00111  | -0.00603 |
| 5C | 1S  | 0        | 0.00002  | 0        | 0        | 0        |
|    | 2S  | -0.00001 | -0.00005 | 0        | 0.00001  | 0        |
|    | 2PX | -0.00004 | -0.00055 | -0.00014 | 0.00001  | -0.00003 |
|    | 2PY | -0.00002 | -0.0009  | -0.00004 | -0.00001 | 0.00002  |
|    | 2PZ | 0.01319  | 0.18492  | -0.05724 | -0.16993 | 0.11127  |
|    | 3S  | -0.00002 | 0.00001  | -0.00001 | 0.00002  | 0.00002  |
|    | 3PX | 0        | -0.00022 | -0.00004 | 0        | -0.00002 |
|    | 3PY | 0        | -0.00026 | -0.00002 | -0.00002 | 0.00001  |
|    | 3PZ | 0.0062   | 0.10299  | -0.03436 | -0.11531 | 0.08196  |
|    | 4XX | 0        | 0.00005  | 0        | 0        | 0        |
|    | 4YY | 0        | -0.00004 | -0.00001 | 0        | 0        |
|    | 4ZZ | 0        | -0.00001 | 0        | 0        | 0        |
|    | 4XY | 0        | -0.00001 | 0.00001  | 0        | 0        |
|    | 4XZ | -0.00069 | -0.00704 | 0.0016   | -0.00117 | 0.00869  |
|    | 4YZ | 0.00032  | 0.00556  | -0.00198 | -0.00894 | 0.01093  |
| 6C | 1S  | 0        | 0.00005  | 0        | 0        | 0        |
|    | 2S  | -0.00001 | -0.00013 | -0.00001 | 0        | 0        |
|    | 2PX | 0.00009  | 0.00068  | 0.00016  | 0.00004  | -0.00005 |
|    | 2PY | 0.00002  | 0.0009   | 0        | -0.00005 | 0.00004  |
|    | 2PZ | 0.01102  | 0.17703  | -0.06015 | -0.24059 | 0.25734  |
|    | 3S  | -0.00002 | -0.00017 | 0        | 0        | 0        |
|    | 3PX | 0.00002  | 0.00015  | 0.00004  | 0.00003  | -0.00003 |
|    | 3PY | 0.00001  | 0.00029  | -0.00001 | -0.00004 | 0.00003  |
|    | 3PZ | 0.00655  | 0.10178  | -0.03489 | -0.15368 | 0.1944   |
|    | 4XX | 0        | 0.00006  | 0.00001  | 0        | 0        |
|    | 4YY | 0        | -0.00004 | -0.00001 | 0        | 0        |

|     |     |          |          |          |          |          |
|-----|-----|----------|----------|----------|----------|----------|
|     | 4ZZ | 0        | 0        | 0        | 0        | 0        |
|     | 4XY | 0        | 0.00001  | 0.00001  | 0        | 0        |
|     | 4XZ | -0.00064 | -0.00838 | 0.00249  | 0.00668  | -0.00308 |
|     | 4YZ | -0.00017 | -0.00244 | 0.00075  | 0.00207  | -0.00152 |
| 7H  | 1S  | 0.00003  | -0.0003  | -0.00004 | 0.00001  | 0        |
|     | 2S  | 0.00003  | -0.00031 | -0.00004 | 0.00002  | 0.00001  |
|     | 3PX | 0        | 0        | 0        | 0        | 0        |
|     | 3PY | 0        | 0.00001  | 0        | 0        | 0        |
|     | 3PZ | 0.0003   | 0.00393  | -0.0012  | -0.00382 | 0.00255  |
| 8H  | 1S  | 0        | -0.00004 | -0.00006 | 0        | 0        |
|     | 2S  | -0.00001 | -0.00001 | -0.00009 | -0.00003 | -0.00003 |
|     | 3PX | 0        | 0        | 0        | 0        | 0        |
|     | 3PY | 0        | 0        | 0        | 0        | 0        |
|     | 3PZ | 0.00051  | 0.00453  | -0.00098 | 0.00049  | -0.00422 |
| 9H  | 1S  | -0.00003 | -0.00059 | -0.00003 | 0.00001  | 0        |
|     | 2S  | -0.00003 | -0.00054 | -0.00005 | 0.00002  | 0        |
|     | 3PX | 0        | 0        | 0        | 0        | 0        |
|     | 3PY | 0        | -0.00002 | 0        | 0        | 0        |
|     | 3PZ | 0.00045  | 0.00447  | -0.00101 | 0.00042  | -0.00411 |
| 10H | 1S  | -0.00001 | 0.00018  | -0.00007 | -0.00002 | 0        |
|     | 2S  | -0.00001 | 0.00019  | -0.00007 | -0.00002 | -0.00001 |
|     | 3PX | 0        | -0.00001 | 0        | 0        | 0        |
|     | 3PY | 0        | -0.00001 | 0        | 0        | 0        |
|     | 3PZ | 0.00028  | 0.00391  | -0.00122 | -0.00392 | 0.00299  |
| 11H | 1S  | 0.00006  | 0.0006   | 0.00011  | 0        | 0        |
|     | 2S  | 0.00006  | 0.00065  | 0.00012  | 0        | 0        |
|     | 3PX | 0        | -0.00002 | 0        | 0        | 0        |
|     | 3PY | 0        | 0.00001  | 0        | 0        | 0        |
|     | 3PZ | 0.0002   | 0.00366  | -0.00132 | -0.0058  | 0.00686  |
| 12C | 1S  | -0.00001 | -0.00006 | -0.00002 | 0        | 0        |
|     | 2S  | 0.00002  | 0.00011  | 0.00004  | -0.00001 | 0        |
|     | 2PX | -0.0001  | 0.00005  | 0.00009  | 0.00002  | 0        |
|     | 2PY | -0.00002 | -0.00133 | 0.00008  | -0.00008 | -0.00001 |
|     | 2PZ | 0.07141  | 0.14036  | 0.04243  | 0.29636  | 0.18611  |
|     | 3S  | 0.00003  | 0.00026  | 0.00011  | -0.00001 | 0.00001  |
|     | 3PX | -0.00003 | 0.00016  | 0.00004  | -0.00001 | 0.00001  |
|     | 3PY | -0.00001 | -0.00049 | 0.00004  | -0.00004 | -0.00001 |
|     | 3PZ | 0.04001  | 0.07843  | 0.03043  | 0.19843  | 0.12145  |
|     | 4XX | 0        | -0.00008 | 0        | 0        | 0        |
|     | 4YY | 0        | 0.00008  | 0        | 0        | -0.00001 |
|     | 4ZZ | 0        | 0        | 0        | 0        | 0        |
|     | 4XY | 0        | 0        | 0        | 0        | 0        |
|     | 4XZ | -0.00291 | 0.00556  | -0.00423 | -0.00079 | -0.01964 |
|     | 4YZ | 0.00244  | 0.00433  | 0.00134  | 0.00814  | 0.00526  |

|     |     |          |          |          |          |          |
|-----|-----|----------|----------|----------|----------|----------|
| 13H | 1S  | 0.00002  | 0.00094  | -0.00004 | 0.00003  | -0.00002 |
|     | 2S  | 0.00001  | 0.00074  | -0.00005 | 0.00003  | -0.00003 |
|     | 3PX | 0        | 0.00001  | 0        | 0        | 0        |
|     | 3PY | 0        | 0.00003  | 0        | 0        | 0        |
|     | 3PZ | 0.00179  | 0.00307  | 0.00108  | 0.00652  | 0.00449  |
| 14C | 1S  | 0        | 0.00004  | 0.00001  | 0.00001  | -0.00001 |
|     | 2S  | 0        | -0.00011 | -0.00003 | -0.00001 | 0.00002  |
|     | 2PX | 0.00006  | 0.00002  | 0.00003  | -0.00002 | 0.00002  |
|     | 2PY | -0.00008 | 0.00124  | -0.00001 | -0.00003 | -0.00008 |
|     | 2PZ | 0.12092  | 0.06954  | 0.09093  | 0.22001  | 0.31198  |
|     | 3S  | -0.00001 | -0.00012 | -0.00007 | -0.00005 | 0.00004  |
|     | 3PX | 0.00001  | 0.00011  | 0        | 0.00001  | -0.00001 |
|     | 3PY | -0.00002 | 0.0003   | -0.00001 | -0.00001 | -0.00005 |
|     | 3PZ | 0.06327  | 0.04163  | 0.05218  | 0.14207  | 0.24243  |
|     | 4XX | 0        | -0.00006 | 0        | 0        | 0        |
|     | 4YY | 0        | 0.00009  | 0        | 0        | 0        |
|     | 4ZZ | 0        | 0        | 0        | 0        | 0        |
|     | 4XY | 0        | -0.00002 | 0        | 0        | 0        |
|     | 4XZ | -0.00534 | 0.00484  | -0.00316 | 0.01058  | 0.00454  |
|     | 4YZ | -0.00509 | -0.0027  | -0.00411 | -0.00714 | -0.0071  |
| 15H | 1S  | -0.00003 | 0.00086  | -0.00002 | 0.00001  | 0        |
|     | 2S  | -0.00003 | 0.00092  | -0.00001 | 0.00002  | -0.00002 |
|     | 3PX | 0        | 0        | 0        | 0        | 0        |
|     | 3PY | 0        | -0.00002 | 0        | 0        | 0        |
|     | 3PZ | 0.00269  | 0.0016   | 0.00187  | 0.00506  | 0.00749  |
| 16C | 1S  | 0.00001  | 0        | 0        | 0        | 0        |
|     | 2S  | -0.00002 | 0.00001  | 0        | 0        | 0        |
|     | 2PX | -0.00006 | -0.00076 | 0.00001  | 0.00001  | 0        |
|     | 2PY | 0.00002  | -0.00058 | -0.00006 | 0.00001  | 0        |
|     | 2PZ | 0.29339  | -0.01366 | 0.17182  | -0.04308 | 0.01044  |
|     | 3S  | -0.00003 | -0.00013 | 0        | 0.00002  | -0.00002 |
|     | 3PX | -0.00002 | -0.00021 | 0.00001  | 0.00002  | -0.00001 |
|     | 3PY | -0.00002 | 0.0001   | 0.00001  | 0        | -0.00001 |
|     | 3PZ | 0.15055  | -0.01186 | 0.09097  | -0.03211 | -0.00064 |
|     | 4XX | 0        | -0.00005 | -0.00001 | 0        | 0        |
|     | 4YY | 0        | 0.00004  | 0.00001  | 0        | 0        |
|     | 4ZZ | 0        | -0.00001 | 0        | 0        | 0        |
|     | 4XY | -0.00001 | 0.00003  | 0        | 0        | 0        |
|     | 4XZ | -0.00588 | 0.00461  | 0.00328  | 0.01372  | 0.01602  |
|     | 4YZ | -0.00329 | -0.00043 | -0.01026 | 0.00105  | 0.01204  |
| 17O | 1S  | 0        | 0.00002  | -0.00002 | 0        | 0        |
|     | 2S  | 0.00001  | -0.00005 | 0.00003  | 0        | 0.00001  |
|     | 2PX | 0.00005  | 0.00009  | 0.00008  | 0        | 0.00001  |
|     | 2PY | -0.00003 | 0.00008  | 0.00015  | -0.00003 | 0.00001  |

|     |     |          |          |          |          |          |
|-----|-----|----------|----------|----------|----------|----------|
|     | 2PZ | 0.22979  | -0.0668  | -0.05    | -0.17194 | -0.07338 |
|     | 3S  | 0.00002  | -0.00014 | 0.00008  | 0        | 0.00002  |
|     | 3PX | 0.00003  | 0.00004  | 0.00005  | 0        | 0.00001  |
|     | 3PY | -0.00002 | 0.00006  | 0.00009  | -0.00002 | 0.00001  |
|     | 3PZ | 0.14813  | -0.0448  | -0.03586 | -0.12586 | -0.05465 |
|     | 4XX | 0        | 0        | 0        | 0        | 0        |
|     | 4YY | 0        | 0.00001  | -0.00001 | 0        | 0        |
|     | 4ZZ | 0        | 0        | 0        | 0        | 0        |
|     | 4XY | 0        | -0.00002 | 0        | 0        | 0        |
|     | 4XZ | 0.00763  | 0.00063  | 0.0085   | -0.0019  | 0.00158  |
|     | 4YZ | -0.01357 | 0.00356  | 0.00277  | 0.00652  | 0.00327  |
| 18C | 1S  | 0        | -0.00002 | 0.00001  | 0        | 0        |
|     | 2S  | -0.00001 | 0.00004  | -0.00002 | 0.00001  | 0        |
|     | 2PX | -0.00004 | -0.00041 | -0.00005 | 0        | -0.00001 |
|     | 2PY | 0.00003  | 0.0007   | -0.00007 | 0        | -0.00001 |
|     | 2PZ | -0.11078 | -0.03289 | -0.26157 | 0.09231  | 0.02783  |
|     | 3S  | -0.00001 | 0.00004  | -0.00001 | 0.00001  | -0.00001 |
|     | 3PX | -0.00002 | -0.00013 | -0.00003 | 0.00001  | 0        |
|     | 3PY | 0.00002  | 0.00023  | -0.00001 | 0        | -0.00002 |
|     | 3PZ | -0.03905 | -0.01743 | -0.11768 | 0.02576  | 0.00498  |
|     | 4XX | 0        | 0        | -0.00001 | 0        | 0        |
|     | 4YY | 0        | 0.00001  | -0.00001 | 0        | 0        |
|     | 4ZZ | 0        | -0.00002 | 0.00002  | 0        | 0        |
|     | 4XY | 0        | -0.00003 | 0.00001  | 0        | 0        |
|     | 4XZ | 0.01252  | -0.0031  | -0.00248 | -0.00673 | -0.00346 |
|     | 4YZ | -0.0002  | 0.00335  | 0.02058  | -0.00829 | -0.00272 |
| 19H | 1S  | -0.05302 | -0.01831 | -0.14746 | 0.06114  | 0.02016  |
|     | 2S  | -0.03381 | -0.01689 | -0.12935 | 0.0646   | 0.0162   |
|     | 3PX | 0.00151  | -0.00055 | -0.001   | -0.00052 | -0.00073 |
|     | 3PY | -0.00277 | -0.00033 | -0.00406 | 0.00174  | 0.00067  |
|     | 3PZ | 0.00058  | 0.00012  | 0.00103  | -0.00046 | 0.00003  |
| 20H | 1S  | 0.05303  | 0.01791  | 0.14759  | -0.06116 | -0.02017 |
|     | 2S  | 0.03383  | 0.01649  | 0.12948  | -0.06464 | -0.01622 |
|     | 3PX | -0.00151 | 0.00053  | 0.001    | 0.00052  | 0.00072  |
|     | 3PY | 0.00276  | 0.00034  | 0.00406  | -0.00174 | -0.00067 |
|     | 3PZ | 0.00059  | 0.0001   | 0.00103  | -0.00046 | 0.00002  |
| 21C | 1S  | 0        | -0.00003 | 0.00001  | 0        | 0        |
|     | 2S  | 0        | 0.00006  | -0.00002 | 0.00001  | 0        |
|     | 2PX | -0.00008 | 0.00032  | 0.00003  | 0.00002  | 0.00001  |
|     | 2PY | 0.00006  | -0.00073 | 0.00004  | -0.00001 | 0        |
|     | 2PZ | -0.26471 | 0.08782  | 0.29401  | -0.03318 | -0.00449 |
|     | 3S  | -0.00001 | 0.00014  | -0.00005 | 0.00003  | 0.00002  |
|     | 3PX | -0.00004 | 0.00016  | 0.00002  | 0.00001  | 0.00001  |
|     | 3PY | 0.00003  | -0.00035 | 0.00002  | -0.00002 | -0.00001 |

|     |     |          |          |          |          |          |
|-----|-----|----------|----------|----------|----------|----------|
|     | 3PZ | -0.1355  | 0.04413  | 0.13371  | 0.0002   | 0.00935  |
|     | 4XX | 0        | 0.00001  | 0        | 0        | 0        |
|     | 4YY | 0.00001  | 0        | -0.00001 | 0        | 0        |
|     | 4ZZ | 0        | -0.00002 | 0.00002  | 0        | 0        |
|     | 4XY | 0        | -0.00002 | 0.00001  | 0        | 0        |
|     | 4XZ | -0.00505 | 0.00082  | 0.0011   | 0.0003   | 0.00015  |
|     | 4YZ | -0.00934 | 0.00501  | 0.02131  | -0.00457 | -0.00116 |
| 22H | 1S  | 0.00002  | -0.00003 | -0.00002 | -0.00001 | -0.00001 |
|     | 2S  | 0.00002  | -0.00004 | -0.00001 | -0.00002 | -0.00001 |
|     | 3PX | 0        | 0        | 0        | 0        | 0        |
|     | 3PY | 0        | -0.00001 | 0        | 0        | 0        |
|     | 3PZ | -0.00474 | 0.00167  | 0.00593  | -0.00089 | -0.00026 |
| 23H | 1S  | -0.13514 | 0.04847  | 0.17277  | -0.02449 | -0.00493 |
|     | 2S  | -0.10013 | 0.04121  | 0.16717  | -0.03903 | -0.01401 |
|     | 3PX | 0.00134  | -0.00058 | -0.00211 | 0.00009  | -0.00003 |
|     | 3PY | 0.00414  | -0.0013  | -0.00442 | 0.00074  | 0.00026  |
|     | 3PZ | 0.00109  | -0.00037 | -0.0014  | 0.00027  | 0.0001   |
| 24H | 1S  | 0.13512  | -0.04889 | -0.17268 | 0.02449  | 0.00493  |
|     | 2S  | 0.10011  | -0.04161 | -0.16707 | 0.03902  | 0.01401  |
|     | 3PX | -0.00134 | 0.0006   | 0.0021   | -0.00009 | 0.00003  |
|     | 3PY | -0.00414 | 0.00128  | 0.00442  | -0.00074 | -0.00026 |
|     | 3PZ | 0.00109  | -0.00039 | -0.00139 | 0.00027  | 0.0001   |
| 25O | 1S  | -0.00001 | 0.00011  | 0        | 0        | 0        |
|     | 2S  | 0.00002  | -0.00024 | -0.00001 | 0        | 0        |
|     | 2PX | -0.00004 | -0.00018 | 0.00005  | 0.00003  | -0.00001 |
|     | 2PY | -0.00005 | 0.00098  | 0.00005  | -0.00002 | 0        |
|     | 2PZ | 0.24677  | -0.01556 | 0.208    | -0.07323 | -0.16616 |
|     | 3S  | 0.00003  | -0.0004  | -0.00001 | 0        | -0.00001 |
|     | 3PX | -0.00002 | -0.00009 | 0.00003  | 0.00002  | -0.00001 |
|     | 3PY | -0.00003 | 0.00058  | 0.00003  | -0.00001 | 0        |
|     | 3PZ | 0.1443   | -0.00847 | 0.13091  | -0.04587 | -0.12401 |
|     | 4XX | 0        | -0.00001 | 0        | 0        | 0        |
|     | 4YY | 0        | 0.00006  | 0        | 0        | 0        |
|     | 4ZZ | 0        | -0.00001 | 0        | 0        | 0        |
|     | 4XY | 0        | -0.00002 | 0        | 0        | 0        |
|     | 4XZ | 0.00326  | 0.00038  | 0.00367  | 0.00031  | 0.00024  |
|     | 4YZ | 0.01846  | -0.00104 | 0.0136   | -0.00439 | -0.00717 |

### 3.5.2 Combined coefficients and computational details of HFV index (F) of 1d

**Table S11.** Combined coefficients  $|c_{ki}|/|c_{kj}|$  after normalization of the  $i$  and  $j$  atoms in the  $k_{th}$  occupied  $\pi$ -type molecular orbital of **1d**

| $i/j$ \ $k$ | 34     | 38     | 39     | 43     | 47     |
|-------------|--------|--------|--------|--------|--------|
| 3           | 0.0665 | 0.4677 | 0.0554 | 0.3102 | 0.3951 |
| 12          | 0.1205 | 0.2555 | 0.0728 | 0.5065 | 0.2929 |
| 14          | 0.2010 | 0.1290 | 0.1459 | 0.3723 | 0.5187 |
| 16          | 0.4851 | 0.0297 | 0.2706 | 0.0787 | 0.0297 |

**Table S12.** The calculation details of HFV index (F) of **1d**

| Active site   | $\pi$ Bond | $\pi$ -Type molecular orbitals with $\delta_k$ in parentheses | $\pi$ Bond order (P) | $\Sigma P$ | HFV (F) |
|---------------|------------|---------------------------------------------------------------|----------------------|------------|---------|
| $\alpha$ (14) | 14-12      | 34 (1),38 (1),43 (1),47 (1)                                   | 0.79 <sup>a</sup>    | 1.06       | 0.70    |
|               | 14-16      | 34 (1),39 (1)                                                 | 0.27 <sup>b</sup>    |            |         |
| $\beta$ (12)  | 12-3       | 38 (1),43 (1),47 (-1)                                         | 0.33 <sup>c</sup>    | 1.12       | 0.64    |
|               | 12-14      | 34 (1),38 (1),43 (1),47 (1)                                   | 0.79 <sup>d</sup>    |            |         |

a :  $P_{14-12}=2*0.2010*0.1205+2*0.1290*0.2555+2*0.3723*0.5065+2*0.5187*0.2929=0.79$

b :  $P_{14-16}=2*0.2010*0.4851+2*0.1459*0.2706=0.27$

c :  $P_{12-3}=2*0.2555*0.4677-2*0.5065*0.3102-2*0.2929*0.3951=0.33$

d :  $P_{12-14}=2*0.2010*0.1205+2*0.1290*0.2555+2*0.3723*0.5065+2*0.5187*0.2929=0.79$

### 3.6 The occupied $\pi$ -type molecular orbitals associated with the active sites of **1e**

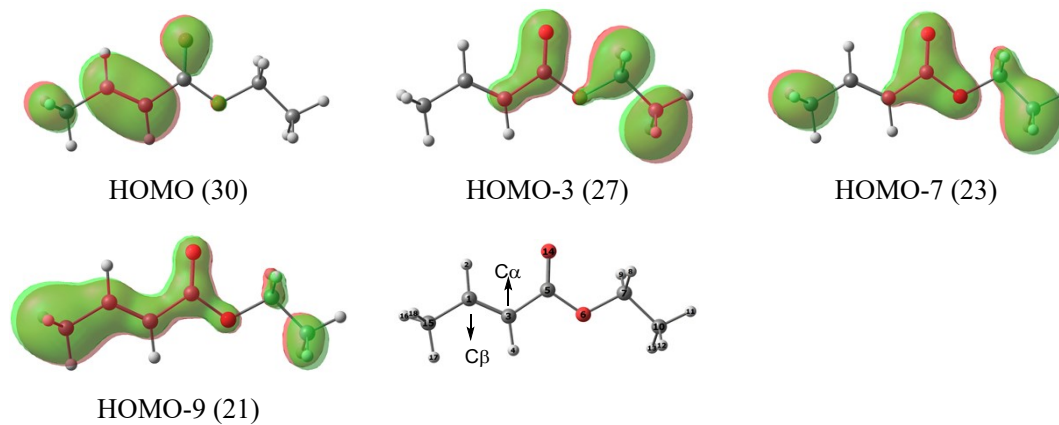

**Fig. S9.** The occupied  $\pi$ -type molecular orbitals associated with the active sites of **1e**



### 3.6.1 Molecular orbital coefficients of 1e

|    |     | 21       | 23       | 27       | 30       |
|----|-----|----------|----------|----------|----------|
| 1C | 1S  | 0.00001  | 0.00005  | 0        | -0.00001 |
|    | 2S  | -0.00002 | -0.00011 | -0.00001 | 0.00003  |
|    | 2PX | -0.00069 | 0.00037  | 0.00005  | 0.00002  |
|    | 2PY | -0.00001 | 0.0003   | 0.00014  | -0.00003 |
|    | 2PZ | 0.15892  | -0.03049 | 0.03972  | 0.34592  |
|    | 3S  | -0.00018 | -0.00008 | -0.00001 | 0.00003  |
|    | 3PX | -0.00033 | 0.00008  | 0.00001  | -0.00019 |
|    | 3PY | 0.00005  | 0.00005  | 0.00005  | 0.00002  |
|    | 3PZ | 0.08358  | -0.01446 | 0.0279   | 0.23047  |
|    | 4XX | 0        | 0.00001  | -0.00001 | 0.00001  |
|    | 4YY | 0.00001  | 0        | 0.00001  | 0        |
|    | 4ZZ | 0        | 0        | 0        | -0.00001 |
|    | 4XY | 0        | -0.00003 | -0.00001 | 0        |
|    | 4XZ | -0.00563 | 0.00768  | 0.00471  | 0.01846  |
|    | 4YZ | -0.00601 | 0.00199  | -0.00055 | -0.00651 |
| 2H | 1S  | 0.00003  | 0.00011  | 0.00011  | 0        |
|    | 2S  | 0        | 0.00013  | 0.0001   | -0.00018 |
|    | 3PX | -0.00001 | 0.00001  | 0        | -0.00001 |
|    | 3PY | 0        | 0        | 0        | 0        |
|    | 3PZ | 0.00329  | -0.00035 | 0.00103  | 0.00806  |
| 3C | 1S  | -0.00003 | -0.0001  | 0.00001  | -0.00005 |
|    | 2S  | 0.00005  | 0.0002   | -0.00001 | 0.00011  |
|    | 2PX | 0.00041  | -0.00006 | -0.00001 | 0.00034  |
|    | 2PY | -0.00074 | -0.00005 | -0.00015 | 0.00018  |
|    | 2PZ | 0.10758  | 0.06468  | 0.08998  | 0.38299  |
|    | 3S  | 0.00028  | 0.00036  | -0.00004 | 0.00048  |
|    | 3PX | -0.00003 | 0.0001   | -0.00002 | 0.00015  |
|    | 3PY | -0.00014 | 0        | -0.00005 | 0.00017  |
|    | 3PZ | 0.05488  | 0.03408  | 0.05247  | 0.28197  |
|    | 4XX | -0.00001 | -0.00002 | -0.00001 | 0        |
|    | 4YY | 0.00003  | 0.00001  | 0.00001  | -0.00002 |
|    | 4ZZ | 0        | -0.00001 | 0        | 0.00001  |
|    | 4XY | 0.00001  | -0.00002 | -0.00001 | 0.00001  |
|    | 4XZ | -0.00211 | 0.00711  | 0.00266  | -0.01217 |
|    | 4YZ | 0.00424  | 0.00383  | 0.0045   | 0.00774  |
| 4H | 1S  | 0.00049  | 0.00012  | 0.00009  | -0.00014 |
|    | 2S  | 0.00041  | 0.00005  | 0.00011  | -0.00014 |
|    | 3PX | 0        | 0        | 0        | 0.00001  |
|    | 3PY | 0.00002  | 0.00001  | 0        | 0        |
|    | 3PZ | 0.00239  | 0.00139  | 0.00183  | 0.00908  |
| 5C | 1S  | -0.00009 | 0.00007  | 0.00001  | -0.00002 |
|    | 2S  | 0.00021  | -0.00017 | -0.00001 | 0.00006  |

|    |     |          |          |          |          |
|----|-----|----------|----------|----------|----------|
|    | 2PX | 0.00008  | 0.00013  | 0.00008  | -0.00012 |
|    | 2PY | 0.00031  | -0.00017 | 0.00008  | -0.00006 |
|    | 2PZ | 0.13452  | 0.26152  | 0.17697  | -0.02976 |
|    | 3S  | 0.00013  | -0.00023 | -0.00002 | 0.00007  |
|    | 3PX | 0.00013  | 0.00009  | 0.00002  | 0.00024  |
|    | 3PY | -0.00011 | 0.00015  | -0.00002 | -0.00013 |
|    | 3PZ | 0.0663   | 0.13652  | 0.09347  | -0.02964 |
|    | 4XX | -0.00003 | 0.00004  | -0.00001 | -0.00001 |
|    | 4YY | 0        | -0.00001 | 0.00001  | 0        |
|    | 4ZZ | -0.00001 | 0.00001  | 0        | 0.00001  |
|    | 4XY | 0.00004  | 0.00001  | 0        | 0.00012  |
|    | 4XZ | 0.0001   | 0.0069   | -0.00457 | -0.01549 |
|    | 4YZ | 0.00137  | 0.00415  | 0.01003  | -0.0204  |
| 6O | 1S  | 0.00009  | 0.00004  | 0        | 0.00003  |
|    | 2S  | -0.00019 | -0.00008 | 0.00001  | -0.00005 |
|    | 2PX | 0.0003   | 0.00015  | -0.00004 | 0.00029  |
|    | 2PY | 0.00026  | 0.00044  | -0.00007 | -0.00048 |
|    | 2PZ | 0.08158  | 0.22621  | -0.04851 | -0.04894 |
|    | 3S  | -0.00048 | -0.00013 | 0.00001  | -0.00029 |
|    | 3PX | 0.00017  | 0.00006  | -0.00003 | 0.00023  |
|    | 3PY | 0.00014  | 0.00026  | -0.00005 | -0.0004  |
|    | 3PZ | 0.05189  | 0.1465   | -0.0348  | -0.0331  |
|    | 4XX | 0.00001  | -0.00002 | 0        | 0.00002  |
|    | 4YY | 0.00003  | 0.00003  | 0        | -0.00001 |
|    | 4ZZ | 0        | 0        | 0        | 0.00001  |
|    | 4XY | 0        | 0.00001  | 0        | 0.00001  |
|    | 4XZ | -0.00465 | -0.00825 | -0.00824 | -0.00041 |
|    | 4YZ | 0.00439  | 0.01212  | -0.00393 | -0.00344 |
| 7C | 1S  | -0.00001 | 0.00003  | 0        | 0.00002  |
|    | 2S  | 0.00002  | -0.00007 | -0.00001 | -0.00004 |
|    | 2PX | -0.00022 | -0.00041 | 0.00008  | -0.00007 |
|    | 2PY | -0.00016 | 0.00025  | -0.00002 | -0.00005 |
|    | 2PZ | -0.06772 | -0.08503 | -0.26825 | 0.0348   |
|    | 3S  | 0.00007  | -0.00007 | 0        | -0.00015 |
|    | 3PX | -0.0001  | -0.00017 | 0.00003  | -0.00016 |
|    | 3PY | -0.00007 | 0.0001   | -0.00002 | 0.00006  |
|    | 3PZ | -0.02592 | -0.02797 | -0.12049 | 0.01356  |
|    | 4XX | 0.00001  | 0.00002  | -0.00001 | 0        |
|    | 4YY | 0        | -0.00001 | -0.00001 | 0.00001  |
|    | 4ZZ | -0.00001 | 0        | 0.00001  | 0        |
|    | 4XY | 0.00001  | 0.00001  | 0        | 0        |
|    | 4XZ | -0.00481 | -0.01196 | 0.00545  | 0.00235  |
|    | 4YZ | -0.00141 | -0.00078 | -0.02052 | 0.00289  |
| 8H | 1S  | -0.03228 | -0.04062 | -0.15136 | 0.02137  |

|     |     |          |          |          |          |
|-----|-----|----------|----------|----------|----------|
|     | 2S  | -0.02181 | -0.02477 | -0.13284 | 0.00979  |
|     | 3PX | -0.00074 | -0.00183 | 0.0004   | 0.00094  |
|     | 3PY | 0.00143  | 0.00204  | 0.00427  | -0.00068 |
|     | 3PZ | 0.00034  | 0.00046  | 0.00105  | 0.00008  |
| 9H  | 1S  | 0.03219  | 0.04072  | 0.15139  | -0.02141 |
|     | 2S  | 0.0217   | 0.02488  | 0.13288  | -0.0097  |
|     | 3PX | 0.00073  | 0.00181  | -0.0004  | -0.00095 |
|     | 3PY | -0.00143 | -0.00203 | -0.00427 | 0.00068  |
|     | 3PZ | 0.00034  | 0.00046  | 0.00105  | 0.00007  |
| 10C | 1S  | -0.00001 | 0        | 0        | 0.00001  |
|     | 2S  | 0.00002  | 0.00001  | 0        | -0.00003 |
|     | 2PX | -0.00022 | 0.00032  | -0.00008 | 0.00008  |
|     | 2PY | -0.00032 | -0.00042 | 0.00003  | 0.00003  |
|     | 2PZ | -0.11094 | -0.25005 | 0.29982  | -0.0095  |
|     | 3S  | 0.00001  | 0.00002  | -0.00001 | 0.00008  |
|     | 3PX | -0.00007 | 0.00016  | -0.00004 | -0.00004 |
|     | 3PY | -0.00014 | -0.00018 | 0.00002  | 0.00004  |
|     | 3PZ | -0.05587 | -0.12868 | 0.13614  | 0.00546  |
|     | 4XX | -0.00001 | -0.00001 | -0.00001 | 0.00001  |
|     | 4YY | 0        | 0        | -0.00001 | 0        |
|     | 4ZZ | 0.00001  | 0.00001  | 0.00001  | -0.00001 |
|     | 4XY | -0.00001 | 0.00002  | 0        | 0        |
|     | 4XZ | 0.00187  | 0.0031   | 0.00209  | -0.00049 |
|     | 4YZ | 0.00368  | 0.00989  | -0.02171 | 0.00145  |
| 11H | 1S  | -0.0002  | 0.00009  | -0.00006 | 0.00007  |
|     | 2S  | -0.00018 | 0.00007  | -0.00005 | 0.00012  |
|     | 3PX | 0.00001  | 0        | 0        | 0        |
|     | 3PY | 0        | -0.00001 | 0        | 0        |
|     | 3PZ | -0.00198 | -0.00449 | 0.00606  | -0.00038 |
| 12H | 1S  | -0.05548 | -0.12851 | 0.17628  | -0.00789 |
|     | 2S  | -0.04039 | -0.09604 | 0.1708   | -0.01541 |
|     | 3PX | -0.00024 | -0.00074 | 0.00146  | -0.00003 |
|     | 3PY | -0.00185 | -0.00402 | 0.00477  | -0.0003  |
|     | 3PZ | 0.00046  | 0.00102  | -0.00143 | 0.00011  |
| 13H | 1S  | 0.05572  | 0.12875  | -0.17623 | 0.00782  |
|     | 2S  | 0.04057  | 0.09623  | -0.17074 | 0.01535  |
|     | 3PX | 0.00023  | 0.00075  | -0.00147 | 0.00004  |
|     | 3PY | 0.00185  | 0.00402  | -0.00478 | 0.0003   |
|     | 3PZ | 0.00047  | 0.00103  | -0.00142 | 0.00011  |
| 14O | 1S  | 0.0001   | -0.00005 | 0.00001  | 0        |
|     | 2S  | -0.00023 | 0.0001   | -0.00002 | -0.00001 |
|     | 2PX | 0.00015  | 0.00019  | 0.00003  | 0.00133  |
|     | 2PY | -0.00059 | 0.00032  | -0.00014 | -0.00004 |
|     | 2PZ | 0.10664  | 0.22572  | 0.21481  | -0.25142 |

|     |     |          |          |          |          |
|-----|-----|----------|----------|----------|----------|
|     | 3S  | -0.00035 | 0.00012  | -0.00003 | 0.00006  |
|     | 3PX | 0.00008  | 0.00011  | 0.00001  | 0.00092  |
|     | 3PY | -0.00034 | 0.0002   | -0.00008 | -0.00005 |
|     | 3PZ | 0.062    | 0.13228  | 0.13532  | -0.18005 |
|     | 4XX | -0.00001 | 0.00001  | 0        | -0.00001 |
|     | 4YY | 0.00004  | -0.00002 | 0.00001  | 0        |
|     | 4ZZ | -0.00001 | 0        | 0        | 0        |
|     | 4XY | -0.00001 | -0.00001 | 0        | -0.00005 |
|     | 4XZ | -0.00051 | -0.00023 | -0.00167 | -0.0014  |
|     | 4YZ | -0.00832 | -0.01696 | -0.01445 | 0.01203  |
| 15C | 1S  | 0.00002  | 0.00001  | 0.00001  | -0.00001 |
|     | 2S  | -0.00003 | -0.00002 | -0.00002 | 0.00003  |
|     | 2PX | 0.00023  | -0.0007  | -0.00008 | 0.00005  |
|     | 2PY | 0.00066  | 0.00022  | -0.0001  | 0        |
|     | 2PZ | 0.37593  | -0.20233 | -0.0426  | -0.1165  |
|     | 3S  | -0.00005 | -0.0001  | -0.00005 | -0.00004 |
|     | 3PX | 0.00011  | -0.00032 | -0.00004 | 0.00001  |
|     | 3PY | 0.00028  | 0.0001   | -0.00004 | -0.00008 |
|     | 3PZ | 0.16529  | -0.09259 | -0.02314 | -0.03988 |
|     | 4XX | 0.00001  | 0        | 0        | 0        |
|     | 4YY | -0.00004 | -0.00001 | 0.00001  | 0.00001  |
|     | 4ZZ | 0.00003  | 0.00001  | 0        | -0.00002 |
|     | 4XY | 0.00003  | -0.00002 | 0        | -0.00001 |
|     | 4XZ | -0.01192 | 0.00816  | 0.00332  | 0.01882  |
|     | 4YZ | 0.01095  | -0.00556 | -0.00086 | 0.00076  |
| 16H | 1S  | -0.19213 | 0.10688  | 0.02555  | 0.09255  |
|     | 2S  | -0.16152 | 0.09194  | 0.0242   | 0.12165  |
|     | 3PX | -0.00656 | 0.00336  | 0.00053  | 0.0008   |
|     | 3PY | 0.00227  | -0.00127 | -0.00034 | -0.00188 |
|     | 3PZ | -0.00156 | 0.00083  | 0.00016  | 0.00055  |
| 17H | 1S  | -0.00056 | -0.00012 | 0.00008  | 0.00009  |
|     | 2S  | -0.00045 | -0.00008 | 0.00008  | 0.00006  |
|     | 3PX | 0.00001  | -0.00001 | 0        | 0        |
|     | 3PY | -0.00002 | 0        | 0        | 0        |
|     | 3PZ | 0.00709  | -0.00374 | -0.00072 | -0.00252 |
| 18H | 1S  | 0.19233  | -0.10644 | -0.02557 | -0.09266 |
|     | 2S  | 0.1617   | -0.09154 | -0.0242  | -0.12178 |
|     | 3PX | 0.00656  | -0.00337 | -0.00053 | -0.00079 |
|     | 3PY | -0.00223 | 0.00127  | 0.00033  | 0.00188  |
|     | 3PZ | -0.00158 | 0.00081  | 0.00016  | 0.00056  |

### 3.6.2 Combined coefficients and computational details of HFV index (F) of 1e

**Table S13.** Combined coefficients  $|c_{ki}| / |c_{kj}|$  after normalization of the  $i$  and  $j$  atoms in the  $k_{th}$  occupied  $\pi$ -type molecular orbital of 1e

| $i/j$ \ $k$ | 21     | 23     | 27     | 30     |
|-------------|--------|--------|--------|--------|
| 1           | 0.2765 | 0.0507 | 0.0674 | 0.5526 |
| 3           | 0.1859 | 0.1075 | 0.1441 | 0.6319 |
| 5           | 0.2307 | 0.4314 | 0.2769 | 0.0653 |
| 15          | 0.6323 | 0.3256 | 0.0671 | 0.1654 |

**Table S14.** The calculation details of HFV index (F) of 1e

| Active site  | $\pi$ Bond | $\pi$ -Type molecular orbitals with $\delta_k$ in parentheses | $\pi$ Bond order (P) | $\Sigma^P$ | HFV (F) |
|--------------|------------|---------------------------------------------------------------|----------------------|------------|---------|
| $\alpha$ (3) | 3-1        | 21 (1),27 (-1),30 (1)                                         | 0.78 <sup>a</sup>    | 1.04       | 0.72    |
|              | 3-5        | 21 (1),23 (1),27 (1),                                         | 0.26 <sup>b</sup>    |            |         |
| $\beta$ (1)  | 1-3        | 21 (1),27 (-1),30 (1)                                         | 0.78 <sup>c</sup>    | 0.95       | 0.81    |
|              | 1-15       | 21 (1), 30 (-1)                                               | 0.17 <sup>d</sup>    |            |         |

a :  $P_{3,1}=2*0.1859*0.2765-2*0.1441*0.0674+2*0.6319*0.5526=0.78$

b :  $P_{3,5}=2*0.1859*0.2307+2*0.1075*0.4314+2*0.1441*0.2769=0.26$

c :  $P_{1,3}=2*0.1859*0.2765-2*0.1441*0.0674+2*0.6319*0.5526=0.78$

d :  $P_{1,15}=2*0.2765*0.6323-2*0.5526*0.1654=0.17$

### 3.7 The occupied $\pi$ -type molecular orbitals associated with the active sites of **III**

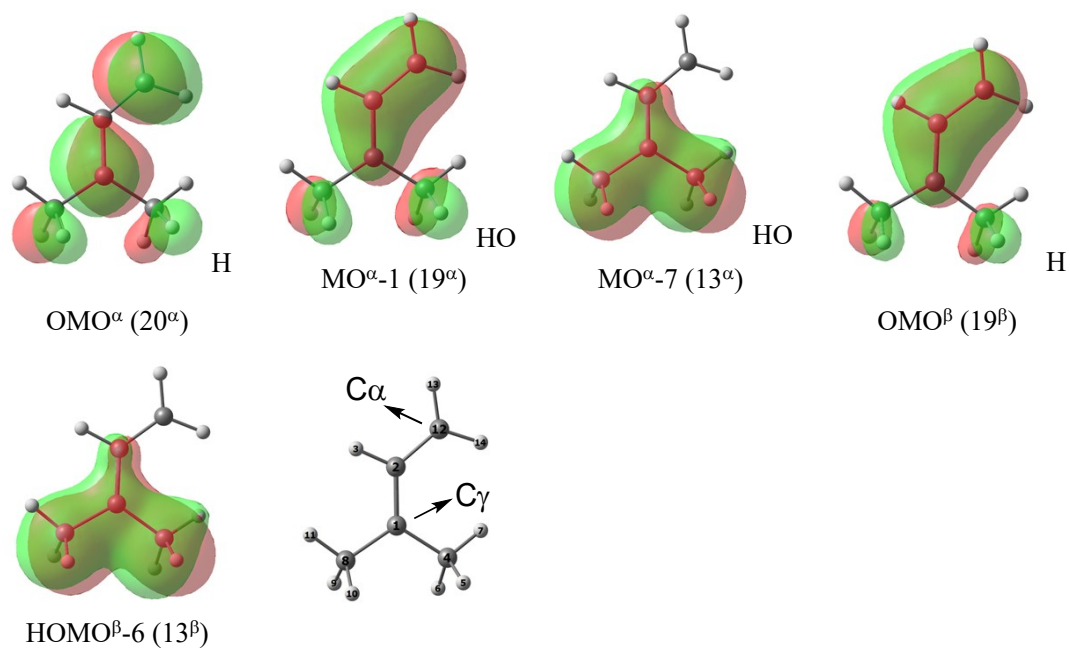

**Fig. S10.** The occupied  $\pi$ -type molecular orbitals associated with the active sites of **III**

### 3.7.1 Molecular orbital coefficients of III

|        | 13 <sup>α</sup> | 19 <sup>α</sup> | 20 <sup>α</sup> | 13 <sup>β</sup> | 19 <sup>β</sup> |
|--------|-----------------|-----------------|-----------------|-----------------|-----------------|
| 1 C 1S | 0.00007         | 0.00017         | 0.00137         | 0.00026         | 0.00028         |
| 2S     | -0.00074        | 0.0005          | -0.00177        | -0.00152        | 0.00007         |
| 2PX    | -0.00182        | -0.00441        | -0.00321        | -0.00291        | -0.00418        |
| 2PY    | 0.00596         | 0.00048         | 0.00237         | 0.00558         | 0.00185         |
| 2PZ    | 0.22377         | 0.21157         | 0.44317         | 0.15873         | 0.18377         |
| 3S     | 0.00429         | -0.00669        | -0.00923        | 0.00656         | -0.00518        |
| 3PX    | -0.00425        | 0.01373         | -0.01169        | -0.00541        | 0.0148          |
| 3PY    | 0.002           | 0.00053         | 0.00104         | 0.00104         | 0.00046         |
| 3PZ    | 0.12052         | 0.13561         | 0.36741         | 0.08159         | 0.10931         |
| 4XX    | -0.00049        | 0.00008         | 0.00074         | -0.00082        | -0.00015        |
| 4YY    | -0.00019        | 0.00031         | 0.00036         | -0.0001         | 0.00028         |
| 4ZZ    | 0.0006          | -0.00019        | -0.00051        | 0.00073         | 0.00006         |
| 4XY    | -0.00009        | -0.00026        | 0.0002          | -0.00019        | -0.00015        |
| 4XZ    | 0.0052          | -0.0165         | -0.00636        | 0.00614         | -0.01707        |
| 4YZ    | 0.00242         | -0.00811        | -0.00511        | 0.00327         | -0.00798        |
| 2 C 1S | 0.00027         | 0.00017         | -0.00046        | 0.00068         | 0.00009         |
| 2S     | -0.00007        | -0.00111        | 0.00172         | -0.00083        | -0.00095        |
| 2PX    | -0.00468        | 0.00559         | 0.0035          | -0.00383        | 0.0057          |
| 2PY    | 0.00542         | -0.00185        | -0.00013        | 0.00398         | -0.00331        |
| 2PZ    | 0.08575         | 0.34785         | 0.0562          | 0.07624         | 0.43275         |
| 3S     | -0.00528        | 0.01002         | -0.00408        | -0.00772        | 0.01019         |
| 3PX    | -0.00303        | 0.00802         | -0.00195        | -0.00389        | 0.00816         |
| 3PY    | -0.00095        | 0.00533         | -0.00364        | -0.00208        | 0.00441         |
| 3PZ    | 0.04026         | 0.2264          | 0.06137         | 0.04059         | 0.31574         |
| 4XX    | 0.00017         | 0.00003         | -0.00007        | 0.00022         | -0.0001         |
| 4YY    | -0.00019        | -0.00015        | 0.00053         | -0.00014        | 0.00005         |
| 4ZZ    | 0.00016         | 0.00011         | -0.00047        | 0.00021         | 0.00008         |
| 4XY    | 0.00009         | 0.00071         | -0.00015        | 0.00016         | 0.00065         |
| 4XZ    | 0.00517         | -0.00359        | 0.03074         | 0.00388         | -0.00299        |
| 4YZ    | 0.00355         | 0.00913         | 0.00143         | 0.00303         | 0.00897         |
| 3 H 1S | -0.00384        | -0.00067        | 0.00195         | -0.00326        | 0.0004          |
| 2S     | -0.00416        | 0.00125         | 0.00202         | -0.00367        | 0.00245         |
| 3PX    | -0.00007        | -0.00004        | 0.00009         | -0.00003        | -0.00003        |
| 3PY    | -0.00017        | -0.00006        | -0.00002        | -0.00017        | -0.00007        |
| 3PZ    | 0.00192         | 0.00805         | 0.00129         | 0.00167         | 0.0099          |
| 4 C 1S | 0.00056         | -0.00087        | 0.00009         | -0.0003         | -0.0007         |
| 2S     | -0.0013         | 0.0012          | 0.00165         | 0.00035         | 0.00084         |
| 2PX    | -0.0047         | -0.00881        | 0.00232         | -0.0081         | -0.00681        |
| 2PY    | -0.0083         | 0.00165         | -0.00344        | -0.007          | -0.00023        |
| 2PZ    | 0.28177         | -0.10459        | -0.05936        | 0.29802         | -0.08415        |
| 3S     | -0.00062        | 0.00645         | -0.00803        | 0.00259         | 0.00601         |
| 3PX    | 0.00096         | -0.02248        | 0.00983         | 0.00006         | -0.02337        |

|         |          |          |          |          |          |
|---------|----------|----------|----------|----------|----------|
| 3PY     | -0.00257 | 0.00519  | -0.00784 | -0.00227 | 0.00436  |
| 3PZ     | 0.1179   | -0.03609 | -0.03157 | 0.13285  | -0.01853 |
| 4XX     | -0.00602 | 0.00332  | 0.00381  | -0.00645 | 0.00265  |
| 4YY     | -0.00003 | 0.00023  | 0.00065  | -0.00014 | 0.00021  |
| 4ZZ     | 0.00613  | -0.00385 | -0.00403 | 0.00652  | -0.00313 |
| 4XY     | 0.0008   | -0.00066 | -0.00021 | 0.0008   | -0.00047 |
| 4XZ     | 0.00914  | -0.00687 | -0.00773 | 0.01003  | -0.00612 |
| 4YZ     | 0.00054  | -0.00956 | -0.01935 | 0.00147  | -0.00882 |
| 5 H 1S  | 0.15462  | -0.0835  | -0.08461 | 0.16344  | -0.06897 |
| 2S      | 0.12808  | -0.09932 | -0.14009 | 0.13711  | -0.08832 |
| 3PX     | -0.00276 | 0.00093  | 0.0002   | -0.00299 | 0.00084  |
| 3PY     | -0.00405 | 0.00043  | -0.0019  | -0.00437 | 0.00028  |
| 3PZ     | -0.00252 | 0.00122  | 0.00088  | -0.00283 | 0.00105  |
| 6 H 1S  | -0.12067 | 0.05907  | 0.06479  | -0.1287  | 0.0494   |
| 2S      | -0.10269 | 0.08279  | 0.10437  | -0.11179 | 0.07716  |
| 3PX     | 0.00461  | -0.00198 | -0.00087 | 0.00481  | -0.00171 |
| 3PY     | 0.00286  | -0.00063 | 0.00125  | 0.00309  | -0.00059 |
| 3PZ     | 0.00092  | -0.00053 | -0.00037 | 0.00086  | -0.00046 |
| 7 H 1S  | -0.03797 | 0.02296  | 0.0202   | -0.03799 | 0.01785  |
| 2S      | -0.03019 | 0.00793  | 0.04617  | -0.03057 | 0.00231  |
| 3PX     | -0.00197 | 0.00102  | 0.00055  | -0.00198 | 0.00082  |
| 3PY     | 0.00116  | 0.00025  | -0.0001  | 0.00114  | 0.00038  |
| 3PZ     | 0.00479  | -0.00168 | -0.00198 | 0.00506  | -0.00146 |
| 8 C 1S  | -0.00035 | 0.00011  | -0.00005 | -0.00039 | 0.0004   |
| 2S      | 0.00112  | -0.00012 | -0.00047 | 0.00135  | -0.00055 |
| 2PX     | -0.00197 | 0.00236  | -0.00092 | -0.00276 | 0.00342  |
| 2PY     | 0.00078  | 0.00038  | -0.00017 | -0.00412 | -0.00059 |
| 2PZ     | 0.27802  | -0.09303 | -0.06995 | 0.28901  | -0.07795 |
| 3S      | 0.00018  | -0.00646 | 0.00592  | -0.00043 | -0.00906 |
| 3PX     | -0.001   | 0.00413  | -0.00179 | -0.00129 | 0.00515  |
| 3PY     | -0.00036 | -0.00121 | 0.00403  | -0.00279 | -0.00202 |
| 3PZ     | 0.1164   | -0.0341  | -0.00482 | 0.12779  | -0.021   |
| 4XX     | -0.00018 | 0.0003   | 0.00034  | -0.00028 | 0.00026  |
| 4YY     | 0.00047  | -0.00045 | 0.00021  | 0.00069  | -0.00036 |
| 4ZZ     | -0.00004 | -0.00009 | -0.0006  | -0.00011 | -0.00004 |
| 4XY     | 0.00001  | 0.00009  | -0.00024 | 0.00012  | 0.00015  |
| 4XZ     | 0.00745  | -0.01202 | -0.02199 | 0.00847  | -0.0111  |
| 4YZ     | 0.00879  | -0.00048 | 0.00421  | 0.00888  | -0.00029 |
| 9 H 1S  | -0.13943 | 0.06903  | 0.08582  | -0.14529 | 0.05908  |
| 2S      | -0.11636 | 0.08617  | 0.15168  | -0.12384 | 0.07852  |
| 3PX     | 0.00517  | -0.00117 | 0.00027  | 0.00549  | -0.00098 |
| 3PY     | 0.00085  | -0.00079 | -0.00169 | 0.00075  | -0.00071 |
| 3PZ     | -0.001   | 0.00043  | 0.00059  | -0.0012  | 0.00035  |
| 10 H 1S | 0.13928  | -0.06699 | -0.08674 | 0.14331  | -0.05692 |



|         |          |          |          |          |          |
|---------|----------|----------|----------|----------|----------|
| 2S      | 0.1171   | -0.08588 | -0.15494 | 0.1233   | -0.07755 |
| 3PX     | -0.00527 | 0.0013   | -0.00015 | -0.00559 | 0.00113  |
| 3PY     | -0.00104 | 0.00086  | 0.00186  | -0.0011  | 0.00073  |
| 3PZ     | -0.00101 | 0.00035  | 0.00053  | -0.00116 | 0.00028  |
| 11 H 1S | 0.00274  | -0.00192 | -0.00023 | 0.0061   | -0.00134 |
| 2S      | 0.00166  | -0.00151 | 0.00162  | 0.00433  | -0.0006  |
| 3PX     | 0.00002  | -0.00006 | -0.00008 | 0.00003  | -0.00006 |
| 3PY     | 0.00018  | -0.00001 | -0.00006 | 0.00027  | -0.00001 |
| 3PZ     | 0.00518  | -0.0018  | -0.002   | 0.00537  | -0.00148 |
| 12 C 1S | -0.00059 | 0.0008   | 0.00125  | -0.00066 | 0.00073  |
| 2S      | 0.00138  | -0.00152 | -0.003   | 0.00144  | -0.00149 |
| 2PX     | 0.00426  | -0.00113 | -0.00587 | 0.00099  | -0.00088 |
| 2PY     | -0.00595 | -0.01143 | 0.00416  | -0.00715 | -0.00774 |
| 2PZ     | 0.03631  | 0.34758  | -0.39727 | 0.0256   | 0.2568   |
| 3S      | 0.00113  | -0.00562 | -0.00526 | 0.00126  | -0.00637 |
| 3PX     | 0.00237  | 0.00049  | -0.00341 | 0.00137  | 0.00049  |
| 3PY     | -0.00221 | -0.00982 | 0.00723  | -0.0021  | -0.00768 |
| 3PZ     | 0.02126  | 0.24566  | -0.37946 | 0.0158   | 0.17946  |
| 4XX     | 0.00039  | 0.00047  | 0.00036  | 0.00043  | 0.00048  |
| 4YY     | -0.00045 | -0.0001  | 0.00013  | -0.00041 | 0.00001  |
| 4ZZ     | -0.00004 | -0.00027 | -0.0001  | -0.0001  | -0.0004  |
| 4XY     | -0.00005 | 0.00017  | 0.00037  | 0.00009  | 0.00006  |
| 4XZ     | 0.00291  | 0.01258  | 0.00168  | 0.00259  | 0.01511  |
| 4YZ     | -0.00071 | -0.00583 | 0.0012   | -0.00057 | -0.00653 |
| 13 H 1S | 0.00058  | 0.00417  | 0.00223  | 0.00286  | 0.00302  |
| 2S      | 0.00063  | 0.00468  | 0.00509  | 0.00271  | 0.004    |
| 3PX     | 0.00008  | 0.00014  | -0.0001  | 0.00014  | 0.00009  |
| 3PY     | -0.00006 | -0.00007 | 0.00011  | -0.00002 | -0.00005 |
| 3PZ     | 0.00056  | 0.00744  | -0.01039 | 0.00047  | 0.00646  |
| 14 H 1S | -0.00411 | -0.00405 | -0.00095 | -0.00479 | -0.00272 |
| 2S      | -0.00225 | 0.00065  | -0.00244 | -0.00316 | 0.00232  |
| 3PX     | 0        | 0.00013  | 0.00001  | -0.00006 | 0.00015  |
| 3PY     | -0.00005 | -0.00001 | 0.00049  | -0.00002 | -0.00005 |
| 3PZ     | 0.00087  | 0.00742  | -0.01014 | 0.00078  | 0.00649  |

### 3.7.2 Combined coefficients and computational details of HFV index (F) of III

**Table S15.** Combined coefficients  $|c_{ki}| / |c_{kj}|$  after normalization of the  $i$  and  $j$  atoms in the  $k_{th}$  occupied  $\pi$ -type molecular orbital of III

| $i/j$ \ $k$ | $13^\alpha$ | $19^\alpha$ | $20^\alpha$ | $13^\beta$ | $19^\beta$ |
|-------------|-------------|-------------|-------------|------------|------------|
| 1           | 0.4051      | 0.3595      | 0.6611      | 0.2840     | 0.3083     |
| 2           | 0.1519      | 0.5916      | 0.1022      | 0.1383     | 0.7676     |
| 4           | 0.4871      | 0.1628      | 0.0830      | 0.5187     | 0.1297     |
| 8           | 0.4804      | 0.1426      | 0.0849      | 0.5021     | 0.1178     |
| 12          | 0.0684      | 0.6069      | 0.6308      | 0.0496     | 0.4496     |

**Table S16.** The calculation details of HFV index (F) of III

| Active site   | $\pi$ Bond | $\pi$ -Type molecular orbitals with $\delta_k$ in parentheses                        | $\pi$ Bond order (P) | $\Sigma P$ | HFV (F) |
|---------------|------------|--------------------------------------------------------------------------------------|----------------------|------------|---------|
| $\alpha$ (12) | 12-2       | $19^\alpha$ (1), $20^\alpha$ (-1), $19^\beta$ (1)                                    | 0.64 <sup>a</sup>    | 0.64       | 1.12    |
| $\gamma$ (1)  | 1-2        | $13^\alpha$ (1), $19^\alpha$ (1), $20^\alpha$ (1), $13^\beta$ (1), $19^\beta$ (1)    | 0.62 <sup>b</sup>    | 1.00       | 0.76    |
|               | 1-4        | $13^\alpha$ (1), $19^\alpha$ (-1), $20^\alpha$ (-1), $13^\beta$ (1), $19^\beta$ (-1) | 0.19 <sup>c</sup>    |            |         |
|               | 1-8        | $13^\alpha$ (1), $19^\alpha$ (-1), $20^\alpha$ (-1), $13^\beta$ (1), $19^\beta$ (-1) | 0.19 <sup>d</sup>    |            |         |

a :  $P_{12,2} = 0.6069 * 0.5916 - 0.6308 * 0.1022 + 0.4496 * 0.7676 = 0.64$

b :  $P_{1,2} = 0.4051 * 0.1519 + 0.3595 * 0.5916 + 0.6611 * 0.1022 + 0.2840 * 0.1383 + 0.3083 * 0.7676 = 0.62$

c :  $P_{1,4} = 0.4051 * 0.4871 - 0.3595 * 0.1628 - 0.6611 * 0.0830 + 0.2840 * 0.5187 - 0.3083 * 0.1297 = 0.19$

d :  $P_{1,8} = 0.4051 * 0.4804 - 0.3595 * 0.1426 - 0.6611 * 0.0849 + 0.2840 * 0.5021 - 0.3083 * 0.1178 = 0.19$

## Part 4: Absolute SPE, GFEC, and GFE of the optimized structures

**Table S17.** The SPE calculated at B3LYP-D3/6-311++G(2df, 2pd)(SDD for Cs)/SMD<sub>solvent</sub> level, GFEC calculated at B3LYP-D3/6-31G(d, p)(Lan2LDZ for Cs)/SMD<sub>solvent</sub> level, and GFE = SPE + GFEC of the stationary points involved in the reaction models

|                                                   | <b>SPE (a.u.)</b> | <b>GFEC (a.u.)</b> | <b>GFE (a.u.)</b> |
|---------------------------------------------------|-------------------|--------------------|-------------------|
| <b>NHC</b>                                        | -708.22622        | 0.244637           | -707.981583       |
| CsHCO <sub>3</sub>                                | -284.77811        | -0.006847          | -284.784953       |
| HCO <sub>3</sub> <sup>-</sup>                     | -264.647046       | 0.00053            | -264.646516       |
| H <sub>2</sub> CO <sub>3</sub>                    | -265.12229        | 0.013171           | -265.109121       |
| Cl <sup>-</sup>                                   | -460.3975         | -0.015023          | -460.41252        |
| HCl                                               | -460.84277        | -0.011271          | -460.854039       |
| CsHCO <sub>3</sub> -THF                           | -517.33423        | 0.094035           | -517.24019        |
| CsHCO <sub>3</sub> -2THF                          | -749.89183        | 0.201932           | -749.689894       |
| CH <sub>3</sub> OH-CsCO <sub>3</sub> <sup>-</sup> | -400.0407         | 0.028574           | -400.01213        |
| <b>NHC+1a</b>                                     | -1552.908459      | 0.35669            | -1552.551769      |
| <b>2a</b>                                         | -682.87351        | 0.07833            | -682.795175       |
| <b>TS1</b>                                        | -1552.8959        | 0.359597           | -1552.536339      |
| <b>M1</b>                                         | -1552.9091        | 0.363391           | -1552.545755      |
| <b>TS2</b>                                        | -1837.6927        | 0.378966           | -1837.313707      |
| <b>TS2'</b>                                       | -2070.2454        | 0.478793           | -2069.766577      |
| <b>TS2''</b>                                      | -2302.8028        | 0.585588           | -2302.217173      |
| <b>TS2'''</b>                                     | -1817.5474        | 0.381264           | -1817.166098      |
| <b>M2</b>                                         | -1552.9143        | 0.361593           | -1552.552714      |
| <b>TS3</b>                                        | -1817.5766        | 0.382231           | -1817.194415      |
| <b>TS3'</b>                                       | -1552.9094        | 0.361961           | -1552.547434      |
| <b>M3</b>                                         | -1092.0552        | 0.352746           | -1091.702434      |
| <b>M3'</b>                                        | -1552.9358        | 0.362826           | -1552.572927      |
| <b>ε-TS4</b>                                      | -1774.9362        | 0.455158           | -1774.481032      |
| <b>TS4'</b>                                       | -2235.7893        | 0.459418           | -2235.329879      |
| <b>M4</b>                                         | -1774.9412        | 0.457803           | -1774.483438      |
| <b>M04</b>                                        | -2175.0226        | 0.512668           | -2174.509908      |
| <b>TS5</b>                                        | -2175.0131        | 0.507348           | -2174.505798      |
| <b>M5</b>                                         | -1890.2354        | 0.496366           | -1889.739033      |
| <b>M05</b>                                        | -2155.4153        | 0.533117           | -2154.882229      |
| <b>TS6</b>                                        | -2155.4114        | 0.531522           | -2154.879867      |
| <b>M6</b>                                         | -1890.7449        | 0.509149           | -1890.235767      |
| <b>TS7</b>                                        | -1890.741         | 0.508732           | -1890.232218      |
| <b>3a</b>                                         | -1182.5309        | 0.240041           | -1182.290902      |
| <b>M1b</b>                                        | -1169.520894      | 0.384693           | -1169.136201      |
| <b>M1b+2b</b>                                     | -3456.458726      | 0.735669           | -3455.723057      |
| <b>TSb</b>                                        | -3456.447768      | 0.739866           | -3455.707902      |
| <b>TSb'</b>                                       | -3456.438689      | 0.74099            | -3455.697699      |

|                              |              |          |              |
|------------------------------|--------------|----------|--------------|
| <b>M2b</b>                   | -3456.461666 | 0.743365 | -3455.718301 |
| <b>M1c</b>                   | -2741.212907 | 0.460141 | -2740.752766 |
| <b>M1c+2c</b>                | -3386.503163 | 0.616206 | -3385.886957 |
| <b>TSc</b>                   | -3386.481361 | 0.618768 | -3385.858938 |
| <b>TSc'</b>                  | -3386.475499 | 0.616561 | -3385.858938 |
| <b>M2c</b>                   | -3386.511647 | 0.618746 | -3385.892901 |
| <b>1d</b>                    | -577.083665  | 0.16587  | -576.917795  |
| <b>1d+B'</b>                 | -908.10473   | 0.303205 | -907.801525  |
| <b>TSd</b>                   | -908.099522  | 0.304737 | -907.794785  |
| <b>TSd'</b>                  | -908.099487  | 0.305755 | -907.793732  |
| <b>M1d</b>                   | -908.123763  | 0.306504 | -907.817259  |
| <b>1e</b>                    | -385.271931  | 0.116232 | -385.155699  |
| <b>1e+B'</b>                 | -716.289499  | 0.252703 | -716.036796  |
| <b>TSe</b>                   | -716.274997  | 0.254359 | -716.020638  |
| <b>TSe'</b>                  | -716.280221  | 0.255035 | -716.025186  |
| <b>M1e</b>                   | -716.298905  | 0.257018 | -716.041887  |
| <b>II+III</b>                | -3485.456168 | 0.722356 | -3484.733812 |
| <b>III</b>                   | -195.983577  | 0.092226 | -195.891351  |
| <b>(S)-<sup>os</sup>TSf</b>  | -3485.45834  | 0.724773 | -3484.733567 |
| <b>(S)-<sup>os</sup>TSf'</b> | -3485.455636 | 0.724501 | -3484.731135 |
| <b>IV</b>                    | -3485.556094 | 0.732361 | -3484.823733 |

**Table S18.** Absolute SPE, GFEC, and GFE of the optimized structures obtained at the B3LYP-D3/6-311++G(2df, 2pd)/SMD<sub>THF</sub>//B3LYP/6-31G(d, p)/SMD<sub>THF</sub> (L2).

|                                  | <b>SPE (a.u.)</b> | <b>GFEC (a.u.)</b> | <b>GFE (a.u.)</b> |
|----------------------------------|-------------------|--------------------|-------------------|
| <b>M3</b>                        | -1092.055095      | 0.351727           | -1091.703368      |
| <b><math>\epsilon</math>-TS4</b> | -1774.932482      | 0.453449           | -1774.479033      |

**Table S19.** Absolute SPE, GFEC, and GFE of the optimized structures obtained at the M06-2X/6-311++G(2df, 2pd)/SMD<sub>THF</sub>//M06-2X/6-31G(d, p)/SMD<sub>THF</sub> (L3).

|                                  | <b>SPE (a.u.)</b> | <b>GFEC (a.u.)</b> | <b>GFE (a.u.)</b> |
|----------------------------------|-------------------|--------------------|-------------------|
| <b>M3</b>                        | -1091.54525       | 0.355696           | -1091.189554      |
| <b><math>\epsilon</math>-TS4</b> | -1774.161409      | 0.46189            | -1773.699519      |

**Table S20.** Absolute SPE, GFEC, and GFE of the optimized structures obtained at the  $\omega$ B97X-D/6-311++G(2df, 2pd)/SMD<sub>THF</sub>// $\omega$ B97X-D/6-31G(d, p)/SMD<sub>THF</sub> (L4).

|                                  | <b>SPE (a.u.)</b> | <b>GFEC (a.u.)</b> | <b>GFE (a.u.)</b> |
|----------------------------------|-------------------|--------------------|-------------------|
| <b>M3</b>                        | -1091.635364      | 0.357574           | -1091.27779       |
| <b><math>\epsilon</math>-TS4</b> | -1774.277013      | 0.462997           | -1773.814016      |

**Table S21.** Absolute SPE, GFEC, and GFE of the different conformers of  $\epsilon$ -TS4.

|                                        | <b>SPE (a.u.)</b> | <b>GFEC (a.u.)</b> | <b>GFE (a.u.)</b> |
|----------------------------------------|-------------------|--------------------|-------------------|
| $\epsilon$ -TS4 $_{\Phi = -60^\circ}$  | -1774.931842      | 0.455034           | -1774.476808      |
| $\epsilon$ -TS4 $_{\Phi = 171^\circ}$  | -1774.93019       | 0.455696           | -1774.474494      |
| $\epsilon$ -TS4 $_{\Phi = -161^\circ}$ | -1774.931055      | 0.456418           | -1774.474637      |
| $\epsilon$ -TS4 $_{\Phi = 78^\circ}$   | -1774.930048      | 0.457047           | -1774.473001      |

## Part 5: Cartesian coordinates of all the stationary points

### NHC

|                                              |          |             |
|----------------------------------------------|----------|-------------|
| Zero-point correction=                       | 0.287528 |             |
| Thermal correction to Energy=                | 0.303082 |             |
| Thermal correction to Enthalpy=              | 0.304026 |             |
| Thermal correction to Gibbs Free Energy=     | 0.244637 |             |
| Sum of electronic and zero-point Energies=   |          | -707.734978 |
| Sum of electronic and thermal Energies=      |          | -707.719424 |
| Sum of electronic and thermal Enthalpies=    |          | -707.718480 |
| Sum of electronic and thermal Free Energies= |          | -707.777869 |

### Cartesian coordinates

|   |           |           |           |
|---|-----------|-----------|-----------|
| C | 3.878352  | 0.132291  | -1.172658 |
| C | 2.438369  | -0.182961 | 0.675794  |
| C | 3.806828  | -0.369252 | 1.252578  |
| C | 4.699028  | 0.250193  | 0.137232  |
| H | 4.092846  | -0.794798 | -1.714159 |
| H | 4.020899  | 0.976206  | -1.849271 |
| H | 3.934418  | 0.116784  | 2.222151  |
| H | 4.010282  | -1.438494 | 1.383715  |
| H | 4.872786  | 1.307068  | 0.359746  |
| H | 5.669186  | -0.243190 | 0.056790  |
| N | 2.504172  | 0.096220  | -0.667082 |
| N | 1.202446  | -0.240851 | 1.078296  |
| N | 0.502897  | 0.017950  | -0.117441 |
| C | 1.263281  | 0.227966  | -1.222430 |
| C | -0.929670 | 0.019303  | -0.067043 |
| C | -1.610301 | 1.239897  | 0.035178  |
| C | -1.604990 | -1.211659 | -0.106458 |
| C | -3.009394 | 1.208038  | 0.077785  |
| C | -3.000825 | -1.195074 | -0.054666 |
| C | -3.719720 | 0.004258  | 0.033714  |
| H | -3.553940 | 2.146225  | 0.152020  |
| H | -3.540341 | -2.138812 | -0.089494 |
| C | -0.855569 | 2.543724  | 0.094032  |
| H | -0.095318 | 2.524532  | 0.882484  |
| H | -0.330859 | 2.740079  | -0.846998 |
| H | -1.532379 | 3.379489  | 0.289208  |
| C | -5.227536 | -0.013540 | 0.101372  |
| H | -5.573321 | -0.373053 | 1.078553  |
| H | -5.649240 | 0.983818  | -0.052803 |
| H | -5.652353 | -0.683515 | -0.654065 |
| C | -0.836387 | -2.503876 | -0.210946 |

|   |           |           |           |
|---|-----------|-----------|-----------|
| H | -0.198949 | -2.511425 | -1.102180 |
| H | -0.176049 | -2.639609 | 0.652401  |
| H | -1.513066 | -3.360387 | -0.265411 |

Vibrational frequencies

|          |          |          |
|----------|----------|----------|
| 54.9620  | 60.4099  | 63.3360  |
| 65.1132  | 145.5954 | 150.6983 |
| 162.4600 | 169.9849 | 201.1837 |
| 230.2547 | 238.4518 | 239.2160 |
| 262.2903 | 285.2001 | 341.0896 |
| 368.6918 | 380.0748 | 512.5174 |
| 517.7449 | 527.5326 | 561.4798 |
| 565.6051 | 582.2082 | 610.8719 |
| 636.9311 | 670.7577 | 691.8183 |
| 734.2736 | 762.7849 | 772.5771 |

**CsHCO<sub>3</sub>**

|                                              |          |             |
|----------------------------------------------|----------|-------------|
| Zero-point correction=                       | 0.026809 |             |
| Thermal correction to Energy=                | 0.032722 |             |
| Thermal correction to Enthalpy=              | 0.033667 |             |
| Thermal correction to Gibbs Free Energy=     |          | -0.006847   |
| Sum of electronic and zero-point Energies=   |          | -284.350996 |
| Sum of electronic and thermal Energies=      |          | -284.345083 |
| Sum of electronic and thermal Enthalpies=    |          | -284.344138 |
| Sum of electronic and thermal Free Energies= |          | -284.384652 |

Cartesian coordinates

|    |           |           |           |
|----|-----------|-----------|-----------|
| C  | -2.186600 | 0.038482  | -0.000113 |
| O  | -1.673959 | -1.111682 | -0.000314 |
| O  | -1.640693 | 1.161686  | -0.000284 |
| Cs | 1.313577  | -0.006001 | 0.000038  |
| O  | -3.595429 | 0.070499  | 0.000374  |
| H  | -3.846501 | -0.864864 | 0.000375  |

Vibrational frequencies

|           |           |           |
|-----------|-----------|-----------|
| 25.6681   | 74.0802   | 99.7716   |
| 545.9308  | 557.5490  | 639.7374  |
| 815.7054  | 891.5015  | 1208.4465 |
| 1345.0049 | 1784.5957 | 3779.8733 |

**HCO<sub>3</sub><sup>-</sup>**

|                                 |          |  |
|---------------------------------|----------|--|
| Zero-point correction=          | 0.026308 |  |
| Thermal correction to Energy=   | 0.029839 |  |
| Thermal correction to Enthalpy= | 0.030783 |  |

|                                              |             |
|----------------------------------------------|-------------|
| Thermal correction to Gibbs Free Energy=     | 0.000530    |
| Sum of electronic and zero-point Energies=   | -264.487782 |
| Sum of electronic and thermal Energies=      | -264.484251 |
| Sum of electronic and thermal Enthalpies=    | -264.483307 |
| Sum of electronic and thermal Free Energies= | -264.513560 |

Cartesian coordinates

|   |           |           |           |
|---|-----------|-----------|-----------|
| C | -0.150205 | 0.064265  | 0.000115  |
| O | 0.068386  | 1.299167  | -0.000029 |
| O | 1.034792  | -0.747755 | -0.000003 |
| O | -1.208426 | -0.588628 | -0.000052 |
| H | 1.743218  | -0.087871 | -0.000014 |

Vibrational frequencies

|           |           |           |
|-----------|-----------|-----------|
| 523.9329  | 543.3730  | 637.0283  |
| 819.0375  | 893.7573  | 1187.0496 |
| 1342.4811 | 1821.3688 | 3779.8826 |

**H<sub>2</sub>CO<sub>3</sub>**

|                                              |             |
|----------------------------------------------|-------------|
| Zero-point correction=                       | 0.039118    |
| Thermal correction to Energy=                | 0.042910    |
| Thermal correction to Enthalpy=              | 0.043854    |
| Thermal correction to Gibbs Free Energy=     | 0.013171    |
| Sum of electronic and zero-point Energies=   | -264.974277 |
| Sum of electronic and thermal Energies=      | -264.970485 |
| Sum of electronic and thermal Enthalpies=    | -264.969541 |
| Sum of electronic and thermal Free Energies= | -265.000224 |

Cartesian coordinates

|   |           |           |           |
|---|-----------|-----------|-----------|
| C | 0.053089  | -0.128825 | -0.000006 |
| O | 0.716444  | -1.136862 | -0.000076 |
| O | 0.541772  | 1.130235  | 0.000015  |
| O | -1.285182 | -0.128196 | 0.000057  |
| H | 1.512220  | 1.065033  | -0.000036 |
| H | -1.615032 | 0.786497  | 0.000107  |

Vibrational frequencies

|           |           |           |
|-----------|-----------|-----------|
| 451.9648  | 545.5470  | 548.0016  |
| 614.1027  | 778.8671  | 996.7891  |
| 1174.6172 | 1259.5765 | 1433.3825 |
| 1889.5812 | 3736.5079 | 3741.8096 |

**Cl<sup>-</sup>**

|                        |          |
|------------------------|----------|
| Zero-point correction= | 0.000000 |
|------------------------|----------|



|                                              |             |             |  |
|----------------------------------------------|-------------|-------------|--|
| Thermal correction to Energy=                | 0.001416    |             |  |
| Thermal correction to Enthalpy=              | 0.002360    |             |  |
| Thermal correction to Gibbs Free Energy=     |             | -0.015023   |  |
| Sum of electronic and zero-point Energies=   |             | -460.349322 |  |
| Sum of electronic and thermal Energies=      | -460.347906 |             |  |
| Sum of electronic and thermal Enthalpies=    |             | -460.346962 |  |
| Sum of electronic and thermal Free Energies= |             | -460.364345 |  |

Cartesian coordinates

|    |          |          |          |
|----|----------|----------|----------|
| Cl | 0.000000 | 0.000000 | 0.000000 |
|----|----------|----------|----------|

### HCl

|                                              |             |             |  |
|----------------------------------------------|-------------|-------------|--|
| Zero-point correction=                       | 0.006625    |             |  |
| Thermal correction to Energy=                | 0.008985    |             |  |
| Thermal correction to Enthalpy=              | 0.009930    |             |  |
| Thermal correction to Gibbs Free Energy=     |             | -0.011271   |  |
| Sum of electronic and zero-point Energies=   |             | -460.799253 |  |
| Sum of electronic and thermal Energies=      | -460.796893 |             |  |
| Sum of electronic and thermal Enthalpies=    |             | -460.795948 |  |
| Sum of electronic and thermal Free Energies= |             | -460.817149 |  |

Cartesian coordinates

|    |          |          |           |
|----|----------|----------|-----------|
| H  | 0.000000 | 0.000000 | -1.220089 |
| Cl | 0.000000 | 0.000000 | 0.071770  |

Vibrational frequencies

2907.9813

### CsHCO<sub>3</sub>-THF

|                                              |             |             |  |
|----------------------------------------------|-------------|-------------|--|
| Zero-point correction=                       | 0.144229    |             |  |
| Thermal correction to Energy=                | 0.157364    |             |  |
| Thermal correction to Enthalpy=              | 0.158308    |             |  |
| Thermal correction to Gibbs Free Energy=     |             | 0.094035    |  |
| Sum of electronic and zero-point Energies=   |             | -516.712722 |  |
| Sum of electronic and thermal Energies=      | -516.699587 |             |  |
| Sum of electronic and thermal Enthalpies=    |             | -516.698643 |  |
| Sum of electronic and thermal Free Energies= |             | -516.762916 |  |

Cartesian coordinates

|    |           |           |           |
|----|-----------|-----------|-----------|
| C  | -3.901775 | 0.359004  | 0.201894  |
| O  | -5.275499 | 0.653809  | 0.316104  |
| O  | -3.181064 | 1.304485  | -0.212136 |
| O  | -3.591848 | -0.805607 | 0.529078  |
| Cs | -0.491888 | -0.438748 | -0.171094 |

|   |           |           |           |
|---|-----------|-----------|-----------|
| H | -5.336991 | 1.576675  | 0.028960  |
| O | 2.693571  | 0.009914  | -0.440459 |
| C | 3.578821  | -0.949509 | 0.172477  |
| C | 3.285532  | 1.323252  | -0.379522 |
| C | 4.912308  | -0.228370 | 0.379464  |
| H | 3.152442  | -1.273608 | 1.134249  |
| H | 3.655544  | -1.826083 | -0.480833 |
| C | 4.447983  | 1.217324  | 0.608428  |
| H | 3.640961  | 1.607969  | -1.380823 |
| H | 2.517183  | 2.042269  | -0.072157 |
| H | 5.524486  | -0.291158 | -0.527371 |
| H | 5.487259  | -0.641258 | 1.212708  |
| H | 5.226433  | 1.962032  | 0.422167  |
| H | 4.088033  | 1.343308  | 1.636149  |

Vibrational frequencies

|           |           |           |
|-----------|-----------|-----------|
| 4.5893    | 9.7131    | 18.8838   |
| 34.8548   | 46.5429   | 48.3543   |
| 62.1451   | 84.7002   | 90.2314   |
| 99.6583   | 265.5480  | 545.6433  |
| 559.1397  | 583.0441  | 639.9477  |
| 674.5919  | 815.2259  | 854.2903  |
| 887.4327  | 891.1782  | 904.7916  |
| 917.7547  | 933.1092  | 977.1286  |
| 1036.6040 | 1080.0262 | 1171.8268 |
| 1189.1054 | 1192.2861 | 1208.6806 |

**CsHCO<sub>3</sub>-2THF**

|                                              |          |             |
|----------------------------------------------|----------|-------------|
| Zero-point correction=                       | 0.262434 |             |
| Thermal correction to Energy=                | 0.282445 |             |
| Thermal correction to Enthalpy=              | 0.283390 |             |
| Thermal correction to Gibbs Free Energy=     |          | 0.201932    |
| Sum of electronic and zero-point Energies=   |          | -749.046686 |
| Sum of electronic and thermal Energies=      |          | -749.026675 |
| Sum of electronic and thermal Enthalpies=    |          | -749.025731 |
| Sum of electronic and thermal Free Energies= |          | -749.107188 |

Cartesian coordinates

|    |           |          |           |
|----|-----------|----------|-----------|
| C  | -0.507590 | 3.698101 | 0.211281  |
| O  | -0.622917 | 5.074085 | 0.484374  |
| O  | -0.811689 | 3.356156 | -0.961911 |
| O  | -0.118271 | 3.004598 | 1.173985  |
| Cs | 0.007826  | 0.365053 | -0.527259 |
| H  | -0.930097 | 5.447059 | -0.355091 |

|   |           |           |           |
|---|-----------|-----------|-----------|
| O | -2.470188 | -1.599813 | 0.120825  |
| C | -3.202626 | -1.507216 | 1.360072  |
| C | -3.269305 | -2.281413 | -0.867082 |
| C | -4.649270 | -1.874678 | 1.027114  |
| H | -2.770685 | -2.208649 | 2.088967  |
| H | -3.093062 | -0.491659 | 1.756885  |
| C | -4.459203 | -2.882671 | -0.116015 |
| H | -3.602449 | -1.556325 | -1.624350 |
| H | -2.647385 | -3.034277 | -1.365001 |
| H | -5.194794 | -0.993166 | 0.671962  |
| H | -5.185119 | -2.285943 | 1.886904  |
| H | -5.341968 | -2.993194 | -0.751673 |
| H | -4.199878 | -3.869038 | 0.285110  |
| O | 2.847584  | -1.113624 | -0.007172 |
| C | 3.692402  | -0.467941 | 0.969898  |
| C | 3.557491  | -2.210695 | -0.613218 |
| C | 4.918601  | -1.368131 | 1.141083  |
| H | 3.976109  | 0.526440  | 0.596518  |
| H | 3.123124  | -0.334410 | 1.897010  |
| C | 5.029129  | -2.017754 | -0.246308 |
| H | 3.170201  | -3.161032 | -0.216025 |
| H | 3.371931  | -2.192311 | -1.693198 |
| H | 4.730535  | -2.131506 | 1.904422  |
| H | 5.810332  | -0.806409 | 1.432292  |
| H | 5.587179  | -2.958155 | -0.245023 |
| H | 5.511694  | -1.332146 | -0.952247 |

Vibrational frequencies

|          |          |          |
|----------|----------|----------|
| 13.2017  | 18.5141  | 21.6367  |
| 25.6688  | 31.6058  | 33.5783  |
| 46.1790  | 48.4040  | 50.3358  |
| 51.3938  | 60.7599  | 62.7865  |
| 71.2736  | 93.2829  | 101.8542 |
| 109.2927 | 115.0035 | 264.3250 |
| 265.8652 | 555.4498 | 560.9066 |
| 584.5450 | 585.4378 | 644.6637 |
| 678.7930 | 679.7985 | 819.2471 |
| 853.2542 | 853.4559 | 883.7848 |

**CH<sub>3</sub>OH-CsCO<sub>3</sub><sup>-</sup>**

|                                          |          |          |
|------------------------------------------|----------|----------|
| Zero-point correction=                   | 0.066370 |          |
| Thermal correction to Energy=            | 0.075605 |          |
| Thermal correction to Enthalpy=          | 0.076549 |          |
| Thermal correction to Gibbs Free Energy= |          | 0.028574 |

|                                              |             |
|----------------------------------------------|-------------|
| Sum of electronic and zero-point Energies=   | -399.501516 |
| Sum of electronic and thermal Energies=      | -399.492282 |
| Sum of electronic and thermal Enthalpies=    | -399.491338 |
| Sum of electronic and thermal Free Energies= | -399.539312 |

Cartesian coordinates

|    |           |           |           |
|----|-----------|-----------|-----------|
| C  | -4.038558 | -1.323575 | 0.367032  |
| H  | -4.453241 | -2.273079 | -0.028404 |
| H  | -2.958720 | -1.469399 | 0.537133  |
| H  | -4.516424 | -1.194667 | 1.369540  |
| O  | -4.274223 | -0.269834 | -0.510439 |
| H  | -3.473551 | 0.409530  | -0.336543 |
| C  | -1.226444 | 0.905020  | 0.046420  |
| O  | -0.255803 | 1.732501  | 0.252578  |
| O  | -2.455227 | 1.368795  | -0.001024 |
| O  | -1.009457 | -0.365248 | -0.111249 |
| Cs | 2.017266  | -0.230741 | -0.019298 |

Vibrational frequencies

|           |           |           |
|-----------|-----------|-----------|
| 55.1820   | 75.7854   | 94.1098   |
| 111.3005  | 126.8261  | 141.2200  |
| 182.1378  | 207.5934  | 302.8454  |
| 673.8758  | 696.1075  | 855.1441  |
| 1057.5793 | 1106.0293 | 1164.4802 |
| 1197.7532 | 1203.6006 | 1365.2171 |
| 1479.3797 | 1501.1210 | 1511.3909 |
| 1534.5029 | 1673.7328 | 2104.4562 |
| 2803.4315 | 2908.4244 | 2999.7879 |

**NHC+1a**

|                                              |              |
|----------------------------------------------|--------------|
| Zero-point correction=                       | 0.417948     |
| Thermal correction to Energy=                | 0.444445     |
| Thermal correction to Enthalpy=              | 0.445389     |
| Thermal correction to Gibbs Free Energy=     | 0.356690     |
| Sum of electronic and zero-point Energies=   | -1552.138497 |
| Sum of electronic and thermal Energies=      | -1552.112000 |
| Sum of electronic and thermal Enthalpies=    | -1552.111056 |
| Sum of electronic and thermal Free Energies= | -1552.199755 |

Cartesian coordinates

|   |           |          |           |
|---|-----------|----------|-----------|
| C | -1.195401 | 1.994819 | -0.753424 |
| C | 0.818059  | 2.349198 | 0.428714  |
| C | -0.051298 | 3.495891 | 0.841861  |
| C | -1.455830 | 2.988906 | 0.403066  |

|   |           |           |           |
|---|-----------|-----------|-----------|
| H | -1.176068 | 2.492148  | -1.728861 |
| H | -1.910548 | 1.174150  | -0.788404 |
| H | 0.009520  | 3.717520  | 1.909322  |
| H | 0.238804  | 4.400272  | 0.294419  |
| H | -1.922656 | 2.451082  | 1.233513  |
| H | -2.121183 | 3.800905  | 0.104282  |
| N | 0.150407  | 1.510957  | -0.431581 |
| N | 2.034623  | 1.935860  | 0.628379  |
| N | 2.079256  | 0.776365  | -0.169038 |
| C | 0.939475  | 0.477344  | -0.848671 |
| C | 3.308491  | 0.039638  | -0.216381 |
| C | 4.053132  | 0.037636  | -1.409361 |
| C | 3.753463  | -0.629155 | 0.935872  |
| C | 5.246274  | -0.690172 | -1.438189 |
| C | 4.958288  | -1.337460 | 0.857471  |
| C | 5.712588  | -1.388400 | -0.318574 |
| H | 5.831663  | -0.702055 | -2.354547 |
| H | 5.314151  | -1.861391 | 1.741334  |
| C | 3.598788  | 0.814156  | -2.619856 |
| H | 2.673628  | 0.404406  | -3.036482 |
| H | 3.393239  | 1.859203  | -2.362046 |
| H | 4.364518  | 0.799002  | -3.399928 |
| C | 6.989765  | -2.188957 | -0.389882 |
| H | 6.809024  | -3.177731 | -0.830455 |
| H | 7.739376  | -1.690999 | -1.013597 |
| H | 7.421856  | -2.346667 | 0.602815  |
| C | 2.985170  | -0.568605 | 2.231177  |
| H | 3.058473  | 0.428456  | 2.679336  |
| H | 1.918542  | -0.767694 | 2.095491  |
| H | 3.380632  | -1.292383 | 2.949288  |
| C | -4.290713 | 0.026622  | 0.863684  |
| C | -3.068376 | -0.268408 | 1.453333  |
| C | -2.130750 | -1.054927 | 0.765704  |
| C | -2.432611 | -1.546185 | -0.511457 |
| C | -3.658723 | -1.249116 | -1.100345 |
| C | -4.593973 | -0.457206 | -0.419911 |
| H | -5.018854 | 0.636007  | 1.391493  |
| H | -2.815894 | 0.105508  | 2.440108  |
| H | -1.697081 | -2.141803 | -1.044922 |
| H | -3.893446 | -1.625699 | -2.091698 |
| C | -0.806388 | -1.328865 | 1.360858  |
| O | -0.449584 | -0.909232 | 2.451486  |
| H | -0.133271 | -1.952230 | 0.741250  |
| C | -5.911530 | -0.133971 | -1.054088 |

|    |           |           |           |
|----|-----------|-----------|-----------|
| H  | -6.323200 | 0.809567  | -0.696237 |
| H  | -5.856291 | -0.125477 | -2.142379 |
| Cl | -7.185040 | -1.410541 | -0.639348 |

Vibrational frequencies

|          |          |          |
|----------|----------|----------|
| 11.4950  | 12.6583  | 32.6812  |
| 35.7410  | 44.1802  | 49.0285  |
| 57.0576  | 58.8234  | 73.6008  |
| 75.3497  | 92.2634  | 107.7508 |
| 134.1607 | 152.5673 | 161.1111 |
| 163.3311 | 185.5740 | 195.0396 |
| 215.2551 | 227.3755 | 229.5412 |
| 242.0552 | 264.6692 | 273.7191 |
| 289.8418 | 339.7723 | 342.0106 |
| 356.2919 | 361.1745 | 385.8061 |

**2a**

|                                              |          |             |
|----------------------------------------------|----------|-------------|
| Zero-point correction=                       | 0.115149 |             |
| Thermal correction to Energy=                | 0.124952 |             |
| Thermal correction to Enthalpy=              | 0.125896 |             |
| Thermal correction to Gibbs Free Energy=     |          | 0.078330    |
| Sum of electronic and zero-point Energies=   |          | -682.519178 |
| Sum of electronic and thermal Energies=      |          | -682.509376 |
| Sum of electronic and thermal Enthalpies=    |          | -682.508431 |
| Sum of electronic and thermal Free Energies= |          | -682.555997 |

Cartesian coordinates

|   |           |           |           |
|---|-----------|-----------|-----------|
| C | 0.736751  | 0.809891  | -0.000059 |
| O | 1.052564  | 1.985149  | -0.000113 |
| C | -0.657911 | 0.317543  | 0.000045  |
| C | -1.682588 | 1.282043  | 0.000042  |
| C | -0.991690 | -1.049191 | 0.000083  |
| C | -3.015373 | 0.889163  | 0.000095  |
| H | -1.412370 | 2.332559  | -0.000005 |
| C | -2.329932 | -1.435758 | 0.000134  |
| H | -0.222558 | -1.811408 | 0.000071  |
| C | -3.340823 | -0.471694 | 0.000145  |
| H | -3.801240 | 1.638197  | 0.000095  |
| H | -2.583843 | -2.491117 | 0.000165  |
| H | -4.382329 | -0.779478 | 0.000183  |
| C | 1.884944  | -0.238404 | -0.000072 |
| F | 3.082170  | 0.356543  | -0.000740 |
| F | 1.812754  | -1.032952 | 1.091876  |
| F | 1.811917  | -1.033758 | -1.091369 |

Vibrational frequencies

|           |           |           |
|-----------|-----------|-----------|
| 30.8785   | 52.2094   | 142.1109  |
| 145.7335  | 238.0625  | 271.5474  |
| 315.8484  | 392.1102  | 408.4063  |
| 439.0737  | 479.5915  | 515.4782  |
| 599.2645  | 629.4449  | 674.4144  |
| 693.0187  | 725.5372  | 750.3147  |
| 812.7155  | 862.1626  | 950.4173  |
| 956.3121  | 997.4929  | 1014.3448 |
| 1023.5307 | 1057.9449 | 1123.9867 |
| 1156.3604 | 1191.1307 | 1200.0053 |

**TS1**

|                                              |              |              |
|----------------------------------------------|--------------|--------------|
| Zero-point correction=                       | 0.418224     |              |
| Thermal correction to Energy=                | 0.443576     |              |
| Thermal correction to Enthalpy=              | 0.444520     |              |
| Thermal correction to Gibbs Free Energy=     |              | 0.359597     |
| Sum of electronic and zero-point Energies=   |              | -1552.128020 |
| Sum of electronic and thermal Energies=      | -1552.102669 |              |
| Sum of electronic and thermal Enthalpies=    |              | -1552.101725 |
| Sum of electronic and thermal Free Energies= |              | -1552.186647 |

Cartesian coordinates

|    |           |           |           |
|----|-----------|-----------|-----------|
| C  | -4.057365 | 0.467873  | 0.589151  |
| C  | -2.808004 | 0.698415  | 1.163188  |
| C  | -1.709685 | -0.087832 | 0.805793  |
| C  | -1.881021 | -1.122751 | -0.122046 |
| C  | -3.126769 | -1.356699 | -0.695038 |
| C  | -4.229340 | -0.559290 | -0.348102 |
| H  | -4.908973 | 1.081284  | 0.873114  |
| H  | -2.664356 | 1.478560  | 1.904058  |
| H  | -1.028027 | -1.739431 | -0.396910 |
| H  | -3.254219 | -2.162505 | -1.413465 |
| C  | -0.365361 | 0.156335  | 1.462123  |
| O  | -0.245843 | 0.996996  | 2.385801  |
| H  | 0.266108  | -0.755176 | 1.450621  |
| C  | -5.569677 | -0.815805 | -0.955807 |
| H  | -6.196117 | 0.075670  | -0.980744 |
| H  | -5.501746 | -1.248365 | -1.953785 |
| Cl | -6.549462 | -2.055821 | 0.029493  |
| C  | -0.506898 | 3.292004  | -0.115188 |
| C  | 1.734445  | 2.822170  | -0.751242 |
| C  | 1.594034  | 4.291507  | -0.997453 |

|   |           |           |           |
|---|-----------|-----------|-----------|
| C | 0.297493  | 4.616734  | -0.195090 |
| H | -1.255034 | 3.199646  | -0.907273 |
| H | -0.980644 | 3.124987  | 0.852768  |
| H | 2.460176  | 4.862936  | -0.659041 |
| H | 1.464401  | 4.479954  | -2.069232 |
| H | 0.571207  | 4.930123  | 0.816092  |
| H | -0.283268 | 5.418011  | -0.654557 |
| N | 0.547185  | 2.295957  | -0.312225 |
| N | 2.659555  | 1.904831  | -0.817156 |
| N | 1.968560  | 0.759151  | -0.390472 |
| C | 0.677925  | 0.973110  | -0.074560 |
| C | 2.672421  | -0.479778 | -0.231877 |
| C | 2.738662  | -1.366505 | -1.317345 |
| C | 3.262770  | -0.755379 | 1.009457  |
| C | 3.410250  | -2.576153 | -1.125924 |
| C | 3.923633  | -1.981411 | 1.152101  |
| C | 4.004431  | -2.900884 | 0.101285  |
| H | 3.474005  | -3.280546 | -1.951931 |
| H | 4.386912  | -2.219289 | 2.106160  |
| C | 2.106088  | -1.013524 | -2.639170 |
| H | 1.019594  | -0.906632 | -2.546387 |
| H | 2.487419  | -0.058079 | -3.015819 |
| H | 2.308261  | -1.783524 | -3.387724 |
| C | 4.719643  | -4.218633 | 0.271860  |
| H | 5.552173  | -4.310485 | -0.435375 |
| H | 5.121805  | -4.331085 | 1.282500  |
| H | 4.045088  | -5.061349 | 0.081091  |
| C | 3.190827  | 0.239698  | 2.140787  |
| H | 3.649265  | 1.191383  | 1.847995  |
| H | 2.156227  | 0.463707  | 2.426839  |
| H | 3.719244  | -0.135584 | 3.020773  |

Vibrational frequencies

|           |          |          |
|-----------|----------|----------|
| -186.5173 | 15.1717  | 24.0417  |
| 30.7036   | 35.3202  | 50.8432  |
| 54.6923   | 64.8433  | 69.2265  |
| 79.0997   | 89.6714  | 121.1212 |
| 126.9634  | 140.8436 | 157.3463 |
| 168.6054  | 182.8031 | 199.4157 |
| 214.8009  | 224.7500 | 232.8067 |
| 247.6196  | 253.9115 | 287.4458 |
| 329.1569  | 340.2808 | 350.0327 |
| 376.1183  | 391.6625 | 411.1733 |



**M1**

|                                              |          |              |
|----------------------------------------------|----------|--------------|
| Zero-point correction=                       | 0.420073 |              |
| Thermal correction to Energy=                | 0.445169 |              |
| Thermal correction to Enthalpy=              | 0.446113 |              |
| Thermal correction to Gibbs Free Energy=     | 0.363391 |              |
| Sum of electronic and zero-point Energies=   |          | -1552.137302 |
| Sum of electronic and thermal Energies=      |          | -1552.112207 |
| Sum of electronic and thermal Enthalpies=    |          | -1552.111263 |
| Sum of electronic and thermal Free Energies= |          | -1552.193984 |

## Cartesian coordinates

|    |           |           |           |
|----|-----------|-----------|-----------|
| C  | 3.785342  | -0.650991 | -1.500334 |
| C  | 2.522173  | -0.129805 | -1.781673 |
| C  | 1.413019  | -0.519898 | -1.031429 |
| C  | 1.578796  | -1.450399 | 0.002655  |
| C  | 2.837955  | -1.970067 | 0.289864  |
| C  | 3.956370  | -1.576972 | -0.462801 |
| H  | 4.646263  | -0.344367 | -2.089906 |
| H  | 2.354342  | 0.576253  | -2.589102 |
| H  | 0.713402  | -1.776182 | 0.577016  |
| H  | 2.961077  | -2.690258 | 1.095101  |
| C  | 0.028354  | 0.065822  | -1.392220 |
| O  | -0.017813 | 0.894592  | -2.438893 |
| H  | -0.662484 | -0.814177 | -1.424402 |
| C  | 5.306444  | -2.139028 | -0.160924 |
| H  | 5.259331  | -3.141844 | 0.263062  |
| H  | 5.967268  | -2.133643 | -1.027372 |
| Cl | 6.208716  | -1.130910 | 1.124031  |
| C  | 1.217086  | 2.882522  | -0.199278 |
| C  | -0.829856 | 2.715316  | 1.005922  |
| C  | -0.295245 | 4.054613  | 1.401534  |
| C  | 0.794998  | 4.288049  | 0.309810  |
| H  | 2.108297  | 2.493756  | 0.299398  |
| H  | 1.337019  | 2.805896  | -1.280586 |
| H  | -1.067412 | 4.825869  | 1.408712  |
| H  | 0.139675  | 4.001385  | 2.405592  |
| H  | 0.358443  | 4.852263  | -0.518469 |
| H  | 1.647029  | 4.850458  | 0.694088  |
| N  | 0.053460  | 2.079540  | 0.179621  |
| N  | -1.909575 | 2.003635  | 1.189632  |
| N  | -1.665010 | 0.862027  | 0.422981  |
| C  | -0.478455 | 0.907079  | -0.207871 |
| C  | -2.669525 | -0.156151 | 0.306076  |
| C  | -3.494973 | -0.150454 | -0.828893 |

|   |           |           |           |
|---|-----------|-----------|-----------|
| C | -2.782540 | -1.105467 | 1.331153  |
| C | -4.453464 | -1.163887 | -0.925711 |
| C | -3.760681 | -2.093647 | 1.188587  |
| C | -4.601315 | -2.138285 | 0.069165  |
| H | -5.101662 | -1.189047 | -1.797863 |
| H | -3.865384 | -2.845890 | 1.966440  |
| C | -3.346051 | 0.909351  | -1.891135 |
| H | -3.526955 | 1.904563  | -1.466449 |
| H | -2.331586 | 0.925496  | -2.314410 |
| H | -4.064754 | 0.750425  | -2.699153 |
| C | -5.666802 | -3.199945 | -0.048037 |
| H | -6.596734 | -2.873095 | 0.434264  |
| H | -5.901187 | -3.418052 | -1.094224 |
| H | -5.359516 | -4.131498 | 0.437033  |
| C | -1.873559 | -1.055460 | 2.532622  |
| H | -0.818645 | -1.097059 | 2.238064  |
| H | -2.009588 | -0.121967 | 3.089709  |
| H | -2.072447 | -1.890739 | 3.207963  |

#### Vibrational frequencies

|          |          |          |
|----------|----------|----------|
| 19.5770  | 29.0249  | 38.4944  |
| 42.9306  | 53.2836  | 68.5545  |
| 80.5914  | 82.2633  | 95.3167  |
| 117.4087 | 130.8648 | 135.8912 |
| 159.4851 | 168.9373 | 181.3258 |
| 187.9455 | 212.2574 | 217.2076 |
| 229.3319 | 240.2981 | 256.2348 |
| 265.6872 | 289.4437 | 309.4433 |
| 339.4272 | 346.0061 | 356.8130 |
| 380.7570 | 402.4984 | 423.9611 |

#### TS2

|                                              |          |              |
|----------------------------------------------|----------|--------------|
| Zero-point correction=                       | 0.444879 |              |
| Thermal correction to Energy=                | 0.475781 |              |
| Thermal correction to Enthalpy=              | 0.476725 |              |
| Thermal correction to Gibbs Free Energy=     |          | 0.378966     |
| Sum of electronic and zero-point Energies=   |          | -1836.481332 |
| Sum of electronic and thermal Energies=      |          | -1836.450430 |
| Sum of electronic and thermal Enthalpies=    |          | -1836.449486 |
| Sum of electronic and thermal Free Energies= |          | -1836.547245 |

#### Cartesian coordinates

|   |           |           |          |
|---|-----------|-----------|----------|
| C | -1.136367 | 0.175431  | 0.115045 |
| O | -0.287844 | -0.289893 | 1.133615 |

|    |           |           |           |
|----|-----------|-----------|-----------|
| H  | -0.634688 | -0.245915 | -0.942313 |
| C  | 1.073277  | -1.584003 | -1.515223 |
| O  | 0.088677  | -0.842979 | -1.995502 |
| O  | 1.094812  | -1.833941 | -0.226269 |
| H  | 0.322372  | -0.982340 | 0.617711  |
| O  | 1.969964  | -2.031823 | -2.283425 |
| Cs | 4.109528  | -2.384619 | -0.023855 |
| C  | -2.537696 | -0.387106 | 0.193171  |
| C  | -3.244919 | -0.699336 | -0.976651 |
| C  | -3.138651 | -0.645987 | 1.434388  |
| C  | -4.539816 | -1.212876 | -0.909190 |
| H  | -2.766228 | -0.546249 | -1.939721 |
| C  | -4.431451 | -1.156316 | 1.504097  |
| H  | -2.573122 | -0.441156 | 2.338063  |
| C  | -5.151623 | -1.437631 | 0.331147  |
| H  | -5.077911 | -1.452277 | -1.823179 |
| H  | -4.893537 | -1.341680 | 2.471134  |
| C  | -6.538778 | -1.985106 | 0.407150  |
| H  | -7.069300 | -1.658518 | 1.301690  |
| H  | -7.129727 | -1.755237 | -0.479394 |
| Cl | -6.552565 | -3.846465 | 0.511335  |
| C  | -1.072589 | 1.628422  | -0.017900 |
| N  | -2.041674 | 2.516235  | -0.366895 |
| N  | 0.051154  | 2.392077  | 0.054952  |
| C  | -3.488532 | 2.513570  | -0.637950 |
| C  | -1.470557 | 3.755224  | -0.508057 |
| N  | -0.196465 | 3.729839  | -0.251791 |
| C  | 1.413367  | 2.022271  | 0.337301  |
| C  | -3.815596 | 4.027853  | -0.596177 |
| H  | -3.666925 | 2.065582  | -1.618785 |
| H  | -4.020297 | 1.935844  | 0.116068  |
| C  | -2.488064 | 4.767277  | -0.925455 |
| C  | 2.285159  | 1.831772  | -0.744210 |
| C  | 1.841570  | 1.973905  | 1.673407  |
| H  | -4.140764 | 4.296545  | 0.412745  |
| H  | -4.616959 | 4.281641  | -1.291732 |
| H  | -2.379110 | 5.715926  | -0.396427 |
| H  | -2.390612 | 4.965579  | -1.998715 |
| C  | 3.632326  | 1.578495  | -0.451062 |
| C  | 1.791899  | 1.875768  | -2.166571 |
| C  | 3.191303  | 1.706468  | 1.913406  |
| C  | 0.867327  | 2.171905  | 2.802816  |
| C  | 4.102268  | 1.515068  | 0.864517  |
| H  | 4.326045  | 1.431790  | -1.275874 |

|   |          |          |           |
|---|----------|----------|-----------|
| H | 1.128467 | 1.020148 | -2.357630 |
| H | 1.234813 | 2.797660 | -2.365722 |
| H | 2.630366 | 1.828298 | -2.867177 |
| H | 3.543763 | 1.661517 | 2.941496  |
| H | 0.279466 | 3.086858 | 2.668393  |
| H | 0.171746 | 1.326462 | 2.822217  |
| H | 1.384687 | 2.235563 | 3.763849  |
| C | 5.562957 | 1.266447 | 1.158163  |
| H | 5.693293 | 0.535134 | 1.963719  |
| H | 6.098063 | 0.907282 | 0.273716  |
| H | 6.058804 | 2.188397 | 1.487002  |

Vibrational frequencies

|           |          |          |
|-----------|----------|----------|
| -432.8085 | 17.2917  | 18.5914  |
| 28.9559   | 35.8845  | 42.6592  |
| 47.7422   | 53.4261  | 69.3083  |
| 69.5673   | 81.0051  | 87.9537  |
| 92.0052   | 97.2781  | 113.4613 |
| 129.9103  | 132.1261 | 148.3701 |
| 156.2669  | 160.6720 | 183.3009 |
| 192.0998  | 207.4282 | 214.9359 |
| 228.5187  | 236.4135 | 247.9165 |
| 249.9562  | 268.4902 | 278.8153 |

**TS2'**

|                                              |              |              |
|----------------------------------------------|--------------|--------------|
| Zero-point correction=                       | 0.561390     |              |
| Thermal correction to Energy=                | 0.600158     |              |
| Thermal correction to Enthalpy=              | 0.601102     |              |
| Thermal correction to Gibbs Free Energy=     |              | 0.478793     |
| Sum of electronic and zero-point Energies=   |              | -2068.754251 |
| Sum of electronic and thermal Energies=      | -2068.715483 |              |
| Sum of electronic and thermal Enthalpies=    |              | -2068.714539 |
| Sum of electronic and thermal Free Energies= |              | -2068.836848 |

Cartesian coordinates

|    |           |           |           |
|----|-----------|-----------|-----------|
| C  | 2.241008  | -0.094059 | 0.057142  |
| O  | 1.248464  | -0.143978 | 1.050329  |
| H  | 1.615280  | 0.086987  | -1.003674 |
| C  | -0.454795 | 0.795333  | -1.583235 |
| O  | 0.714766  | 0.387700  | -2.053287 |
| O  | -0.643519 | 0.795019  | -0.285220 |
| H  | 0.407330  | 0.246205  | 0.549336  |
| O  | -1.362525 | 1.169773  | -2.378393 |
| Cs | -3.716698 | 1.061518  | -0.423225 |

|    |           |           |           |
|----|-----------|-----------|-----------|
| C  | 3.174470  | 1.095066  | 0.216636  |
| C  | 3.524706  | 1.879322  | -0.892348 |
| C  | 3.637553  | 1.485155  | 1.484115  |
| C  | 4.348028  | 2.996624  | -0.746203 |
| H  | 3.122143  | 1.620921  | -1.867395 |
| C  | 4.460907  | 2.597700  | 1.631827  |
| H  | 3.339755  | 0.908821  | 2.354840  |
| C  | 4.831732  | 3.366187  | 0.515500  |
| H  | 4.606728  | 3.595727  | -1.616217 |
| H  | 4.819596  | 2.880274  | 2.619096  |
| C  | 5.718893  | 4.558283  | 0.670864  |
| H  | 6.403741  | 4.465800  | 1.513192  |
| H  | 6.276243  | 4.784950  | -0.237292 |
| Cl | 4.762977  | 6.116711  | 1.027335  |
| C  | 2.896628  | -1.389533 | -0.111593 |
| N  | 4.147902  | -1.673340 | -0.567849 |
| N  | 2.310736  | -2.615195 | 0.005346  |
| C  | 5.375322  | -0.949829 | -0.941474 |
| C  | 4.256713  | -3.030980 | -0.728007 |
| N  | 3.166048  | -3.646569 | -0.382803 |
| C  | 0.977798  | -2.993653 | 0.409332  |
| C  | 6.412495  | -2.100794 | -0.994438 |
| H  | 5.227844  | -0.465444 | -1.910712 |
| H  | 5.619136  | -0.191707 | -0.199496 |
| C  | 5.606040  | -3.403751 | -1.253287 |
| C  | 0.015658  | -3.213196 | -0.587375 |
| C  | 0.720568  | -3.233967 | 1.769907  |
| H  | 6.919545  | -2.172183 | -0.028254 |
| H  | 7.167774  | -1.920737 | -1.760981 |
| H  | 6.026333  | -4.276470 | -0.749585 |
| H  | 5.537981  | -3.632981 | -2.322765 |
| C  | -1.243444 | -3.678372 | -0.181384 |
| C  | 0.308525  | -2.948441 | -2.042128 |
| C  | -0.548548 | -3.697931 | 2.120964  |
| C  | 1.763781  | -2.960867 | 2.820455  |
| C  | -1.544260 | -3.926838 | 1.160508  |
| H  | -2.001425 | -3.856743 | -0.940560 |
| H  | 0.466395  | -1.874465 | -2.217482 |
| H  | 1.207608  | -3.480931 | -2.372485 |
| H  | -0.526481 | -3.279262 | -2.666334 |
| H  | -0.764588 | -3.887802 | 3.170048  |
| H  | 2.717951  | -3.444217 | 2.583430  |
| H  | 1.943084  | -1.882162 | 2.885580  |
| H  | 1.435142  | -3.318378 | 3.799974  |

|   |            |           |           |
|---|------------|-----------|-----------|
| C | -2.901188  | -4.445571 | 1.573702  |
| H | -3.375674  | -3.783389 | 2.307526  |
| H | -3.573480  | -4.535535 | 0.715502  |
| H | -2.822534  | -5.434011 | 2.042111  |
| O | -6.930572  | 1.262702  | 0.088969  |
| C | -7.931494  | 1.487600  | -0.923786 |
| C | -7.569678  | 0.977213  | 1.349736  |
| C | -9.252735  | 0.995254  | -0.332024 |
| H | -7.976434  | 2.561584  | -1.157766 |
| H | -7.635791  | 0.952569  | -1.833297 |
| C | -9.054556  | 1.296026  | 1.160934  |
| H | -7.418175  | -0.083723 | 1.597364  |
| H | -7.094229  | 1.580931  | 2.131396  |
| H | -9.366093  | -0.082941 | -0.493054 |
| H | -10.119842 | 1.499703  | -0.766989 |
| H | -9.696328  | 0.699679  | 1.815166  |
| H | -9.247245  | 2.355481  | 1.364342  |

#### Vibrational frequencies

|           |          |          |
|-----------|----------|----------|
| -474.0829 | 9.6687   | 12.9705  |
| 14.0726   | 17.4290  | 23.7302  |
| 28.2872   | 31.0699  | 37.8242  |
| 40.3134   | 42.0511  | 44.0600  |
| 49.1381   | 54.1727  | 56.2533  |
| 61.2031   | 64.4221  | 69.9280  |
| 73.2055   | 86.5455  | 92.1998  |
| 98.8985   | 115.3637 | 128.6826 |
| 136.3569  | 146.5387 | 154.3294 |
| 173.5664  | 181.9723 | 196.1513 |

#### TS2''

|                                              |          |              |
|----------------------------------------------|----------|--------------|
| Zero-point correction=                       | 0.679659 |              |
| Thermal correction to Energy=                | 0.725211 |              |
| Thermal correction to Enthalpy=              | 0.726155 |              |
| Thermal correction to Gibbs Free Energy=     |          | 0.585588     |
| Sum of electronic and zero-point Energies=   |          | -2301.103759 |
| Sum of electronic and thermal Energies=      |          | -2301.058207 |
| Sum of electronic and thermal Enthalpies=    |          | -2301.057263 |
| Sum of electronic and thermal Free Energies= |          | -2301.197830 |

#### Cartesian coordinates

|   |          |           |           |
|---|----------|-----------|-----------|
| C | 2.730910 | -0.201010 | -0.043028 |
| O | 1.785353 | 0.054647  | 0.965143  |
| H | 2.060559 | -0.251753 | -1.097273 |

|    |           |           |           |
|----|-----------|-----------|-----------|
| C  | -0.010996 | 0.363320  | -1.750056 |
| O  | 1.128861  | -0.183210 | -2.149569 |
| O  | -0.126331 | 0.728005  | -0.496389 |
| H  | 0.940850  | 0.354860  | 0.412432  |
| O  | -0.961035 | 0.515841  | -2.568733 |
| Cs | -3.222399 | 0.541651  | -0.493450 |
| C  | 3.730683  | 0.931291  | -0.213049 |
| C  | 4.061641  | 1.403802  | -1.491197 |
| C  | 4.287731  | 1.577376  | 0.903237  |
| C  | 4.958898  | 2.460778  | -1.653177 |
| H  | 3.590856  | 0.949056  | -2.357974 |
| C  | 5.185980  | 2.628503  | 0.743976  |
| H  | 4.006654  | 1.248632  | 1.899249  |
| C  | 5.540666  | 3.078822  | -0.538823 |
| H  | 5.204431  | 2.813930  | -2.652027 |
| H  | 5.620624  | 3.108266  | 1.618092  |
| C  | 6.522521  | 4.192337  | -0.710287 |
| H  | 7.257667  | 4.228447  | 0.093099  |
| H  | 7.028648  | 4.156781  | -1.674228 |
| Cl | 5.716435  | 5.870368  | -0.672286 |
| C  | 3.315834  | -1.532296 | 0.094956  |
| N  | 4.531735  | -1.991043 | -0.314315 |
| N  | 2.683666  | -2.654118 | 0.543232  |
| C  | 5.763745  | -1.456050 | -0.919313 |
| C  | 4.574719  | -3.347818 | -0.120050 |
| N  | 3.475318  | -3.795439 | 0.408085  |
| C  | 1.349940  | -2.844809 | 1.058201  |
| C  | 6.745899  | -2.641208 | -0.732698 |
| H  | 5.576571  | -1.221715 | -1.970850 |
| H  | 6.085329  | -0.551937 | -0.405456 |
| C  | 5.870237  | -3.918293 | -0.602147 |
| C  | 0.346539  | -3.260078 | 0.170467  |
| C  | 1.126485  | -2.713828 | 2.439428  |
| H  | 7.315050  | -2.494061 | 0.189323  |
| H  | 7.453050  | -2.705017 | -1.561267 |
| H  | 6.289006  | -4.657398 | 0.083551  |
| H  | 5.717705  | -4.407533 | -1.570942 |
| C  | -0.919440 | -3.536213 | 0.707259  |
| C  | 0.599124  | -3.384180 | -1.310671 |
| C  | -0.151889 | -2.999528 | 2.922693  |
| C  | 2.215908  | -2.239115 | 3.363672  |
| C  | -1.188361 | -3.412413 | 2.073267  |
| H  | -1.708678 | -3.865045 | 0.034937  |
| H  | 0.780949  | -2.395743 | -1.757438 |

|   |           |           |           |
|---|-----------|-----------|-----------|
| H | 1.469798  | -4.015606 | -1.519117 |
| H | -0.265911 | -3.831799 | -1.808566 |
| H | -0.342132 | -2.901411 | 3.989238  |
| H | 3.139303  | -2.814697 | 3.236698  |
| H | 2.444246  | -1.189901 | 3.146906  |
| H | 1.904220  | -2.319638 | 4.408497  |
| C | -2.558493 | -3.717746 | 2.630746  |
| H | -3.014848 | -2.825484 | 3.076760  |
| H | -3.234246 | -4.086668 | 1.853538  |
| H | -2.508402 | -4.476806 | 3.420111  |
| O | -4.464901 | 2.350670  | 1.890486  |
| C | -4.155025 | 2.204904  | 3.292111  |
| C | -4.817297 | 3.719291  | 1.611900  |
| C | -4.151390 | 3.617118  | 3.886437  |
| H | -4.924757 | 1.574850  | 3.760075  |
| H | -3.189464 | 1.695039  | 3.392750  |
| C | -5.135152 | 4.354094  | 2.964990  |
| H | -3.970109 | 4.227239  | 1.126253  |
| H | -5.663069 | 3.723636  | 0.915512  |
| H | -3.153511 | 4.063089  | 3.809547  |
| H | -4.448793 | 3.626567  | 4.938674  |
| H | -4.999444 | 5.439139  | 2.961851  |
| H | -6.169689 | 4.136139  | 3.254454  |
| O | -6.139435 | -0.363406 | -1.628640 |
| C | -7.031549 | -1.451288 | -1.315305 |
| C | -6.541869 | 0.253722  | -2.868962 |
| C | -8.235240 | -1.295681 | -2.245693 |
| H | -6.514449 | -2.406621 | -1.490140 |
| H | -7.292869 | -1.394402 | -0.252577 |
| C | -7.585700 | -0.675475 | -3.491706 |
| H | -6.967764 | 1.245088  | -2.656336 |
| H | -5.656213 | 0.390417  | -3.499990 |
| H | -8.966225 | -0.603670 | -1.811918 |
| H | -8.738066 | -2.246549 | -2.442454 |
| H | -8.292016 | -0.139917 | -4.131944 |
| H | -7.097819 | -1.451032 | -4.092874 |

Vibrational frequencies

|           |         |         |
|-----------|---------|---------|
| -542.9801 | 7.5428  | 11.2288 |
| 12.0117   | 14.0019 | 15.8210 |
| 20.7005   | 22.4577 | 28.2721 |
| 31.9887   | 35.4730 | 37.3518 |
| 42.9635   | 44.2690 | 49.1167 |
| 53.0229   | 54.9506 | 56.1412 |



|          |          |          |
|----------|----------|----------|
| 61.8562  | 64.5196  | 68.5515  |
| 68.8146  | 72.6633  | 77.0267  |
| 80.9383  | 90.2705  | 108.7164 |
| 109.0862 | 110.7490 | 116.0724 |

### TS2'''

|                                              |          |              |
|----------------------------------------------|----------|--------------|
| Zero-point correction=                       | 0.442460 |              |
| Thermal correction to Energy=                | 0.471243 |              |
| Thermal correction to Enthalpy=              | 0.472187 |              |
| Thermal correction to Gibbs Free Energy=     |          | 0.381264     |
| Sum of electronic and zero-point Energies=   |          | -1816.636101 |
| Sum of electronic and thermal Energies=      |          | -1816.607318 |
| Sum of electronic and thermal Enthalpies=    |          | -1816.606374 |
| Sum of electronic and thermal Free Energies= |          | -1816.697297 |

### Cartesian coordinates

|   |           |           |           |
|---|-----------|-----------|-----------|
| C | -3.693564 | -1.630164 | 1.268011  |
| C | -2.344196 | -1.295722 | 1.314203  |
| C | -1.698828 | -0.739695 | 0.197230  |
| C | -2.438859 | -0.600875 | -0.992540 |
| C | -3.788364 | -0.934134 | -1.041526 |
| C | -4.438710 | -1.449495 | 0.091210  |
| H | -4.182585 | -2.039235 | 2.149717  |
| H | -1.746278 | -1.458388 | 2.204942  |
| H | -1.940374 | -0.241483 | -1.889121 |
| H | -4.344550 | -0.813134 | -1.968529 |
| C | -0.221331 | -0.450000 | 0.261607  |
| O | 0.462873  | -1.065613 | 1.280203  |
| H | 0.242261  | -1.011190 | -0.801968 |
| C | -5.882715 | -1.798456 | 0.043162  |
| H | -6.223306 | -2.074397 | -0.954406 |
| H | -6.161041 | -2.568755 | 0.761555  |
| C | -2.016336 | 2.420527  | -0.358311 |
| C | 0.247624  | 3.100658  | -0.510696 |
| C | -0.526466 | 4.336564  | -0.839929 |
| C | -1.931195 | 3.965411  | -0.289529 |
| H | -2.455895 | 2.066419  | -1.293841 |
| H | -2.563801 | 1.977200  | 0.472471  |
| H | -0.105702 | 5.233953  | -0.382951 |
| H | -0.547248 | 4.485750  | -1.925660 |
| H | -2.008202 | 4.284415  | 0.753762  |
| H | -2.739397 | 4.437014  | -0.851075 |
| N | -0.597504 | 2.039316  | -0.303755 |
| N | 1.490637  | 2.777316  | -0.320924 |

|    |           |           |           |
|----|-----------|-----------|-----------|
| N  | 1.428688  | 1.423323  | 0.016430  |
| C  | 0.147471  | 0.942836  | 0.031507  |
| C  | 2.665342  | 0.730715  | 0.247472  |
| C  | 3.426904  | 0.338642  | -0.863024 |
| C  | 3.104893  | 0.544450  | 1.566385  |
| C  | 4.650211  | -0.295407 | -0.619755 |
| C  | 4.331659  | -0.095627 | 1.756879  |
| C  | 5.112303  | -0.531193 | 0.678484  |
| H  | 5.249966  | -0.618467 | -1.467026 |
| H  | 4.684739  | -0.261169 | 2.772041  |
| C  | 2.933465  | 0.558546  | -2.269222 |
| H  | 2.083110  | -0.106699 | -2.459885 |
| H  | 2.611907  | 1.593330  | -2.426827 |
| H  | 3.719249  | 0.329700  | -2.994693 |
| C  | 6.409159  | -1.266218 | 0.912957  |
| H  | 6.238892  | -2.349760 | 0.946406  |
| H  | 7.129974  | -1.077109 | 0.110985  |
| H  | 6.869515  | -0.978169 | 1.863410  |
| C  | 2.254144  | 0.976848  | 2.728269  |
| H  | 1.948296  | 2.025661  | 2.636260  |
| H  | 1.351797  | 0.352761  | 2.725313  |
| H  | 2.786943  | 0.856589  | 3.675926  |
| C  | 1.677590  | -2.689368 | -1.256565 |
| O  | 0.839860  | -1.793374 | -1.731839 |
| O  | 1.760886  | -2.819861 | 0.075841  |
| O  | 2.366999  | -3.414988 | -1.987857 |
| H  | 1.200384  | -2.085398 | 0.605749  |
| Cl | -6.981032 | -0.336558 | 0.503925  |

#### Vibrational frequencies

|           |          |          |
|-----------|----------|----------|
| -905.5524 | 19.5976  | 23.2874  |
| 32.8518   | 37.7808  | 45.8216  |
| 53.1937   | 60.0626  | 73.6878  |
| 79.4579   | 103.1103 | 113.7348 |
| 131.5156  | 135.1914 | 150.4052 |
| 155.6828  | 167.3858 | 177.9634 |
| 183.5995  | 199.8941 | 207.0704 |
| 225.3021  | 235.0553 | 241.1515 |
| 250.8374  | 253.7244 | 269.1843 |
| 282.3170  | 286.7705 | 319.7285 |

#### M2

|                               |          |
|-------------------------------|----------|
| Zero-point correction=        | 0.418976 |
| Thermal correction to Energy= | 0.444809 |

|                                              |              |
|----------------------------------------------|--------------|
| Thermal correction to Enthalpy=              | 0.445753     |
| Thermal correction to Gibbs Free Energy=     | 0.361593     |
| Sum of electronic and zero-point Energies=   | -1552.144895 |
| Sum of electronic and thermal Energies=      | -1552.119063 |
| Sum of electronic and thermal Enthalpies=    | -1552.118119 |
| Sum of electronic and thermal Free Energies= | -1552.202279 |

Cartesian coordinates

|   |           |           |           |
|---|-----------|-----------|-----------|
| C | -1.330071 | 2.647167  | -0.163353 |
| C | 0.972766  | 2.865780  | 0.264703  |
| C | 0.474536  | 4.278470  | 0.236939  |
| C | -1.060712 | 4.080904  | 0.346763  |
| H | -1.468918 | 2.603471  | -1.250644 |
| H | -2.193851 | 2.182967  | 0.309972  |
| H | 0.887803  | 4.894366  | 1.038885  |
| H | 0.755119  | 4.740220  | -0.715930 |
| H | -1.366948 | 4.150535  | 1.394481  |
| H | -1.621431 | 4.824536  | -0.221828 |
| N | -0.077602 | 1.975551  | 0.198327  |
| N | 2.132724  | 2.299362  | 0.197909  |
| N | 1.828950  | 0.929533  | 0.060042  |
| C | 0.450942  | 0.703117  | -0.001369 |
| C | 2.898873  | -0.011390 | 0.066763  |
| C | 3.824869  | 0.013633  | -0.993071 |
| C | 3.020942  | -0.923756 | 1.130294  |
| C | 4.884609  | -0.897563 | -0.964624 |
| C | 4.089749  | -1.824824 | 1.105793  |
| C | 5.030015  | -1.829014 | 0.070070  |
| H | 5.607085  | -0.887373 | -1.777292 |
| H | 4.192957  | -2.536303 | 1.921771  |
| C | 3.677915  | 0.989178  | -2.133386 |
| H | 2.653061  | 0.996946  | -2.520693 |
| H | 3.896342  | 2.012887  | -1.812010 |
| H | 4.353990  | 0.734487  | -2.953758 |
| C | 6.157066  | -2.832548 | 0.052603  |
| H | 5.859804  | -3.746520 | -0.477501 |
| H | 7.040405  | -2.434933 | -0.456760 |
| H | 6.449245  | -3.126290 | 1.065684  |
| C | 2.031580  | -0.931138 | 2.264427  |
| H | 1.840679  | 0.083421  | 2.629713  |
| H | 1.069154  | -1.343482 | 1.941233  |
| H | 2.398463  | -1.534841 | 3.098510  |
| C | -0.191844 | -0.480721 | -0.296059 |
| O | 0.572017  | -1.558448 | -0.765632 |

|    |           |           |           |
|----|-----------|-----------|-----------|
| H  | 1.155189  | -1.248413 | -1.473406 |
| C  | -1.594344 | -0.771433 | -0.096248 |
| C  | -2.234211 | -1.752885 | -0.894386 |
| C  | -2.365632 | -0.171447 | 0.930903  |
| C  | -3.576488 | -2.054438 | -0.722810 |
| H  | -1.654461 | -2.264522 | -1.654759 |
| C  | -3.712311 | -0.472100 | 1.089139  |
| H  | -1.885389 | 0.500704  | 1.634666  |
| C  | -4.347159 | -1.413343 | 0.263459  |
| H  | -4.044926 | -2.796448 | -1.365452 |
| H  | -4.278107 | 0.007931  | 1.884235  |
| C  | -5.788361 | -1.724627 | 0.428421  |
| H  | -6.150466 | -1.552221 | 1.441462  |
| H  | -6.049794 | -2.730532 | 0.101722  |
| Cl | -6.887414 | -0.612721 | -0.633002 |

#### Vibrational frequencies

|          |          |          |
|----------|----------|----------|
| 20.0443  | 27.9588  | 35.9686  |
| 42.8577  | 48.4741  | 60.9455  |
| 78.6680  | 91.9898  | 105.9002 |
| 121.8185 | 129.2216 | 131.3421 |
| 151.1736 | 152.7046 | 180.9586 |
| 188.0118 | 190.9989 | 224.1022 |
| 232.2472 | 237.5749 | 248.2262 |
| 259.2872 | 282.2248 | 286.9469 |
| 318.6552 | 337.2995 | 345.8413 |
| 357.5594 | 368.8287 | 388.2658 |

#### TS3

|                                              |          |              |
|----------------------------------------------|----------|--------------|
| Zero-point correction=                       | 0.446411 |              |
| Thermal correction to Energy=                | 0.476081 |              |
| Thermal correction to Enthalpy=              | 0.477025 |              |
| Thermal correction to Gibbs Free Energy=     | 0.382231 |              |
| Sum of electronic and zero-point Energies=   |          | -1816.663097 |
| Sum of electronic and thermal Energies=      |          | -1816.633427 |
| Sum of electronic and thermal Enthalpies=    |          | -1816.632483 |
| Sum of electronic and thermal Free Energies= |          | -1816.727277 |

#### Cartesian coordinates

|   |           |          |           |
|---|-----------|----------|-----------|
| C | -1.482013 | 2.544462 | -1.344773 |
| C | 0.772231  | 3.110872 | -0.946310 |
| C | 0.236952  | 4.283184 | -1.708166 |
| C | -1.296832 | 4.056063 | -1.612332 |
| H | -1.537223 | 1.950890 | -2.263641 |

|   |           |           |           |
|---|-----------|-----------|-----------|
| H | -2.356092 | 2.321575  | -0.734595 |
| H | 0.557816  | 5.243386  | -1.298225 |
| H | 0.591550  | 4.225616  | -2.742968 |
| H | -1.700899 | 4.621661  | -0.767839 |
| H | -1.822734 | 4.370506  | -2.515006 |
| N | -0.230684 | 2.221023  | -0.646683 |
| N | 1.950195  | 2.660519  | -0.637904 |
| N | 1.693745  | 1.384586  | -0.122634 |
| C | 0.349470  | 1.074440  | -0.146445 |
| C | 2.779978  | 0.636316  | 0.434140  |
| C | 3.721562  | 0.063538  | -0.434027 |
| C | 2.883858  | 0.523629  | 1.830450  |
| C | 4.788861  | -0.639222 | 0.136445  |
| C | 3.961590  | -0.196440 | 2.350638  |
| C | 4.924859  | -0.782586 | 1.520513  |
| H | 5.525052  | -1.095050 | -0.521124 |
| H | 4.054552  | -0.297325 | 3.429489  |
| C | 3.566575  | 0.148676  | -1.930856 |
| H | 4.486202  | -0.167581 | -2.431358 |
| H | 2.756234  | -0.511151 | -2.264650 |
| H | 3.330432  | 1.165461  | -2.257273 |
| C | 6.096817  | -1.524880 | 2.115204  |
| H | 6.843765  | -0.825997 | 2.512907  |
| H | 5.783549  | -2.166422 | 2.945768  |
| H | 6.595242  | -2.152032 | 1.370287  |
| C | 1.857615  | 1.149126  | 2.739227  |
| H | 2.176438  | 1.096871  | 3.783441  |
| H | 1.689429  | 2.201455  | 2.485460  |
| H | 0.892381  | 0.637291  | 2.653398  |
| C | -0.237977 | -0.159980 | 0.179229  |
| O | 0.593973  | -1.251296 | 0.154972  |
| H | 0.846531  | -1.481292 | -0.844222 |
| C | -1.599762 | -0.321987 | 0.545942  |
| C | -2.224515 | -1.605078 | 0.424177  |
| C | -2.386140 | 0.726667  | 1.128251  |
| C | -3.534091 | -1.797726 | 0.789700  |
| H | -1.655349 | -2.418328 | -0.010701 |
| C | -3.689868 | 0.519208  | 1.508136  |
| H | -1.921300 | 1.686318  | 1.331559  |
| C | -4.317332 | -0.750034 | 1.355916  |
| H | -3.994129 | -2.772246 | 0.643221  |
| H | -4.253572 | 1.330988  | 1.962254  |
| C | -5.666996 | -0.951512 | 1.728207  |
| H | -6.128166 | -0.238701 | 2.402350  |

|    |           |           |           |
|----|-----------|-----------|-----------|
| C  | 0.689571  | -3.263770 | -2.220838 |
| O  | 0.267302  | -3.846308 | -1.019519 |
| O  | 1.013143  | -2.021409 | -2.154368 |
| O  | 0.704831  | -3.997421 | -3.206339 |
| H  | 0.314654  | -3.165338 | -0.325836 |
| H  | -6.029586 | -1.969068 | 1.820744  |
| Cl | -7.102237 | -0.445923 | 0.037328  |

Vibrational frequencies

|           |          |          |
|-----------|----------|----------|
| -188.6802 | 13.0185  | 21.6548  |
| 25.4881   | 32.5204  | 42.2792  |
| 50.5100   | 59.6948  | 61.3577  |
| 67.5004   | 71.0256  | 90.9976  |
| 94.0860   | 115.1629 | 126.7458 |
| 136.5881  | 138.3343 | 145.2787 |
| 175.2744  | 181.9695 | 188.1607 |
| 196.0954  | 207.4285 | 233.1405 |
| 239.4587  | 255.9889 | 272.1537 |
| 286.2399  | 291.8043 | 298.4024 |

**TS3'**

|                                              |          |              |
|----------------------------------------------|----------|--------------|
| Zero-point correction=                       | 0.418740 |              |
| Thermal correction to Energy=                | 0.444006 |              |
| Thermal correction to Enthalpy=              | 0.444950 |              |
| Thermal correction to Gibbs Free Energy=     |          | 0.361961     |
| Sum of electronic and zero-point Energies=   |          | -1552.137622 |
| Sum of electronic and thermal Energies=      |          | -1552.112355 |
| Sum of electronic and thermal Enthalpies=    |          | -1552.111411 |
| Sum of electronic and thermal Free Energies= |          | -1552.194400 |

Cartesian coordinates

|   |           |          |           |
|---|-----------|----------|-----------|
| C | -1.320648 | 2.699677 | -0.288615 |
| C | 0.954178  | 2.889826 | 0.317291  |
| C | 0.448620  | 4.297163 | 0.362145  |
| C | -1.090183 | 4.083703 | 0.358586  |
| H | -1.390079 | 2.744327 | -1.380217 |
| H | -2.195536 | 2.181395 | 0.098547  |
| H | 0.805266  | 4.847610 | 1.234949  |
| H | 0.786520  | 4.830361 | -0.532996 |
| H | -1.460680 | 4.063323 | 1.387152  |
| H | -1.619555 | 4.870146 | -0.180643 |
| N | -0.069980 | 2.008824 | 0.070490  |
| N | 2.115500  | 2.304576 | 0.331630  |
| N | 1.816748  | 0.968574 | 0.074905  |

|    |           |           |           |
|----|-----------|-----------|-----------|
| C  | 0.473006  | 0.764625  | -0.108235 |
| C  | 2.874320  | 0.000789  | 0.085152  |
| C  | 3.781733  | -0.002644 | -0.986004 |
| C  | 2.973913  | -0.890111 | 1.163847  |
| C  | 4.813918  | -0.943856 | -0.956895 |
| C  | 4.021313  | -1.815542 | 1.143022  |
| C  | 4.944862  | -1.861511 | 0.092594  |
| H  | 5.528047  | -0.965300 | -1.776029 |
| H  | 4.117771  | -2.515435 | 1.969054  |
| C  | 3.644763  | 0.972125  | -2.128415 |
| H  | 2.649433  | 0.918538  | -2.586229 |
| H  | 3.779767  | 2.003862  | -1.788040 |
| H  | 4.384563  | 0.766804  | -2.905567 |
| C  | 6.041815  | -2.896826 | 0.074750  |
| H  | 5.710956  | -3.802804 | -0.448632 |
| H  | 6.931997  | -2.528309 | -0.444121 |
| H  | 6.331328  | -3.193280 | 1.087454  |
| C  | 1.988888  | -0.850492 | 2.303218  |
| H  | 1.859914  | 0.169200  | 2.681572  |
| H  | 1.001854  | -1.207708 | 1.987508  |
| H  | 2.325533  | -1.481669 | 3.129015  |
| C  | -0.166218 | -0.443118 | -0.477975 |
| O  | 0.608062  | -1.396871 | -1.125942 |
| H  | 1.112845  | -0.978440 | -1.839660 |
| C  | -1.488969 | -0.792973 | -0.160020 |
| C  | -2.125620 | -1.890215 | -0.837405 |
| C  | -2.236342 | -0.152485 | 0.890478  |
| C  | -3.419268 | -2.236321 | -0.562307 |
| H  | -1.565884 | -2.419727 | -1.599351 |
| C  | -3.525765 | -0.513474 | 1.166844  |
| H  | -1.749020 | 0.590342  | 1.512928  |
| C  | -4.184381 | -1.561873 | 0.445757  |
| H  | -3.892749 | -3.039305 | -1.121579 |
| H  | -4.063819 | -0.017750 | 1.970740  |
| C  | -5.507218 | -1.898128 | 0.704501  |
| H  | -6.017119 | -1.487992 | 1.566778  |
| H  | -5.944022 | -2.782709 | 0.259181  |
| Cl | -7.100471 | -0.536141 | -0.719255 |

Vibrational frequencies

|          |          |          |
|----------|----------|----------|
| -77.0411 | 13.9376  | 21.1605  |
| 38.7888  | 50.0697  | 54.4865  |
| 64.6200  | 83.5795  | 100.0484 |
| 117.4499 | 136.8281 | 140.8895 |

|          |          |          |
|----------|----------|----------|
| 149.3508 | 164.7685 | 168.2871 |
| 186.7421 | 193.9236 | 199.8733 |
| 224.6143 | 236.8957 | 252.8183 |
| 265.6619 | 286.9581 | 288.3954 |
| 298.4164 | 312.9297 | 343.0490 |
| 355.7697 | 368.8470 | 381.5168 |

### M3

|                                              |              |              |
|----------------------------------------------|--------------|--------------|
| Zero-point correction=                       | 0.405688     |              |
| Thermal correction to Energy=                | 0.429131     |              |
| Thermal correction to Enthalpy=              | 0.430076     |              |
| Thermal correction to Gibbs Free Energy=     |              | 0.352746     |
| Sum of electronic and zero-point Energies=   |              | -1091.328916 |
| Sum of electronic and thermal Energies=      | -1091.305473 |              |
| Sum of electronic and thermal Enthalpies=    |              | -1091.304529 |
| Sum of electronic and thermal Free Energies= |              | -1091.381858 |

### Cartesian coordinates

|   |           |           |           |
|---|-----------|-----------|-----------|
| C | 2.124022  | 2.695025  | 0.460889  |
| C | -0.068919 | 2.934969  | -0.430436 |
| C | 0.539391  | 4.290694  | -0.598514 |
| C | 2.052137  | 3.987843  | -0.389952 |
| H | 2.150889  | 2.889849  | 1.535945  |
| H | 2.948076  | 2.036401  | 0.190290  |
| H | 0.320752  | 4.735125  | -1.570940 |
| H | 0.146858  | 4.959901  | 0.175026  |
| H | 2.523170  | 3.805164  | -1.359285 |
| H | 2.575406  | 4.812464  | 0.094993  |
| N | 0.831644  | 2.069892  | 0.135080  |
| N | -1.227044 | 2.358346  | -0.614429 |
| N | -1.030881 | 1.077891  | -0.123541 |
| C | 0.215474  | 0.892852  | 0.341314  |
| C | -2.085219 | 0.102054  | -0.195024 |
| C | -3.029904 | 0.072340  | 0.838903  |
| C | -2.120174 | -0.763455 | -1.295680 |
| C | -4.055483 | -0.870571 | 0.740061  |
| C | -3.166520 | -1.689196 | -1.346567 |
| C | -4.137174 | -1.758646 | -0.340190 |
| H | -4.803317 | -0.916936 | 1.527442  |
| H | -3.220683 | -2.372888 | -2.189577 |
| C | -2.910079 | 1.007286  | 2.011593  |
| H | -1.967541 | 0.809805  | 2.533989  |
| H | -2.901857 | 2.054424  | 1.689069  |
| H | -3.738282 | 0.870137  | 2.710810  |



|   |           |           |           |
|---|-----------|-----------|-----------|
| C | -5.236036 | -2.790261 | -0.401850 |
| H | -4.932303 | -3.711119 | 0.111771  |
| H | -6.148385 | -2.432509 | 0.085030  |
| H | -5.478097 | -3.057583 | -1.434884 |
| C | -1.065275 | -0.703703 | -2.370508 |
| H | -0.944246 | 0.314390  | -2.756647 |
| H | -0.091460 | -1.022880 | -1.981251 |
| H | -1.323627 | -1.357963 | -3.206366 |
| C | 0.710348  | -0.318664 | 1.093417  |
| O | 0.004804  | -0.629568 | 2.087147  |
| C | 1.892469  | -0.935891 | 0.630560  |
| C | 2.461642  | -2.022811 | 1.384509  |
| C | 2.571621  | -0.575331 | -0.586768 |
| C | 3.598646  | -2.657045 | 0.991784  |
| H | 1.951049  | -2.319459 | 2.296424  |
| C | 3.709436  | -1.205326 | -0.992928 |
| H | 2.157143  | 0.206708  | -1.219112 |
| C | 4.314774  | -2.289324 | -0.226616 |
| H | 4.003385  | -3.468056 | 1.593810  |
| H | 4.187789  | -0.909771 | -1.924081 |
| C | 5.461142  | -2.916069 | -0.620192 |
| H | 5.978420  | -2.630545 | -1.531878 |
| H | 5.894485  | -3.721666 | -0.034350 |

#### Vibrational frequencies

|          |          |          |
|----------|----------|----------|
| 22.7708  | 42.3915  | 48.1417  |
| 60.3891  | 67.4569  | 71.9662  |
| 98.3131  | 98.8996  | 127.1366 |
| 140.4817 | 161.7827 | 167.6375 |
| 182.3790 | 195.9988 | 214.9275 |
| 230.1102 | 234.3548 | 242.2216 |
| 251.8885 | 265.8553 | 287.4867 |
| 292.2979 | 327.4077 | 339.4978 |
| 374.7864 | 384.3854 | 417.5706 |
| 433.0253 | 457.4596 | 487.0702 |

#### M3'

|                                            |          |              |
|--------------------------------------------|----------|--------------|
| Zero-point correction=                     | 0.418528 |              |
| Thermal correction to Energy=              | 0.444073 |              |
| Thermal correction to Enthalpy=            | 0.445017 |              |
| Thermal correction to Gibbs Free Energy=   |          | 0.362826     |
| Sum of electronic and zero-point Energies= |          | -1552.164393 |
| Sum of electronic and thermal Energies=    |          | -1552.138848 |
| Sum of electronic and thermal Enthalpies=  |          | -1552.137904 |

Sum of electronic and thermal Free Energies= -1552.220095

Cartesian coordinates

|   |           |           |           |
|---|-----------|-----------|-----------|
| C | -2.529478 | 2.648019  | -0.707221 |
| C | -0.398362 | 3.264202  | 0.140861  |
| C | -1.167450 | 4.545637  | 0.131507  |
| C | -2.628711 | 4.035804  | -0.029064 |
| H | -2.541668 | 2.700820  | -1.798953 |
| H | -3.285565 | 1.941063  | -0.369517 |
| H | -1.014803 | 5.136378  | 1.036382  |
| H | -0.849268 | 5.149637  | -0.725279 |
| H | -3.085042 | 3.920742  | 0.957533  |
| H | -3.244109 | 4.719914  | -0.613997 |
| N | -1.182648 | 2.223278  | -0.282911 |
| N | 0.830178  | 2.875494  | 0.363144  |
| N | 0.809643  | 1.530549  | 0.053257  |
| C | -0.409902 | 1.119506  | -0.351045 |
| C | 1.966453  | 0.705559  | 0.287513  |
| C | 2.951041  | 0.637020  | -0.706443 |
| C | 2.043570  | 0.002966  | 1.497280  |
| C | 4.054404  | -0.180228 | -0.455442 |
| C | 3.169210  | -0.800186 | 1.698379  |
| C | 4.176418  | -0.909907 | 0.733128  |
| H | 4.829939  | -0.259349 | -1.212789 |
| H | 3.253017  | -1.361055 | 2.625256  |
| C | 2.796451  | 1.383323  | -2.004507 |
| H | 3.707952  | 1.318043  | -2.602954 |
| H | 1.972512  | 0.951609  | -2.582909 |
| H | 2.568402  | 2.441549  | -1.838488 |
| C | 5.346787  | -1.836423 | 0.942953  |
| H | 5.144873  | -2.809071 | 0.477474  |
| H | 6.260372  | -1.440474 | 0.488602  |
| H | 5.536945  | -2.013579 | 2.005545  |
| C | 0.949210  | 0.096943  | 2.529414  |
| H | 1.239969  | -0.412902 | 3.450537  |
| H | 0.716884  | 1.139159  | 2.774863  |
| H | 0.026982  | -0.371049 | 2.165793  |
| C | -0.742282 | -0.225785 | -0.813445 |
| O | 0.151374  | -0.688017 | -1.704531 |
| H | 0.471146  | -1.637200 | -1.478860 |
| C | -1.860928 | -0.903374 | -0.376736 |
| C | -2.230195 | -2.171470 | -0.981027 |
| C | -2.691908 | -0.428942 | 0.718014  |
| C | -3.330785 | -2.849383 | -0.581222 |

|    |           |           |           |
|----|-----------|-----------|-----------|
| H  | -1.603156 | -2.563177 | -1.772883 |
| C  | -3.786637 | -1.114489 | 1.123017  |
| H  | -2.406138 | 0.472346  | 1.251040  |
| C  | -4.191963 | -2.364721 | 0.491278  |
| H  | -3.597635 | -3.784585 | -1.066075 |
| H  | -4.380276 | -0.747177 | 1.955796  |
| C  | -5.302274 | -3.038333 | 0.884526  |
| H  | -5.936063 | -2.667925 | 1.684875  |
| H  | -5.593144 | -3.971174 | 0.410713  |
| Cl | 1.194157  | -3.320477 | -1.032364 |

#### Vibrational frequencies

|          |          |          |
|----------|----------|----------|
| 30.3223  | 40.0046  | 48.7058  |
| 51.4905  | 61.3325  | 70.6973  |
| 80.6742  | 86.8085  | 105.4288 |
| 108.8750 | 127.4425 | 135.1077 |
| 143.9382 | 153.6747 | 172.1416 |
| 193.5119 | 214.6832 | 221.7806 |
| 238.6072 | 239.1150 | 253.3097 |
| 263.5750 | 283.4247 | 292.3701 |
| 293.1318 | 340.4449 | 350.7184 |
| 374.1454 | 384.7930 | 415.6094 |

#### $\epsilon$ -TS4

|                                              |              |              |
|----------------------------------------------|--------------|--------------|
| Zero-point correction=                       | 0.522397     |              |
| Thermal correction to Energy=                | 0.556182     |              |
| Thermal correction to Enthalpy=              | 0.557126     |              |
| Thermal correction to Gibbs Free Energy=     |              | 0.455034     |
| Sum of electronic and zero-point Energies=   |              | -1773.856514 |
| Sum of electronic and thermal Energies=      | -1773.822730 |              |
| Sum of electronic and thermal Enthalpies=    |              | -1773.821785 |
| Sum of electronic and thermal Free Energies= |              | -1773.923878 |

#### Cartesian coordinates

|   |           |          |           |
|---|-----------|----------|-----------|
| C | 0.648336  | 2.647858 | -0.498167 |
| C | 2.874563  | 2.806412 | 0.330617  |
| C | 2.340000  | 4.197287 | 0.451738  |
| C | 0.808545  | 3.959089 | 0.308057  |
| H | 0.618122  | 2.810121 | -1.578344 |
| H | -0.206242 | 2.043290 | -0.198477 |
| H | 2.615691  | 4.675174 | 1.393125  |
| H | 2.735115  | 4.808380 | -0.367212 |
| H | 0.365757  | 3.826477 | 1.298679  |
| H | 0.305189  | 4.791183 | -0.184793 |

|   |           |           |           |
|---|-----------|-----------|-----------|
| N | 1.917925  | 1.965244  | -0.174354 |
| N | 4.003982  | 2.173981  | 0.524585  |
| N | 3.732413  | 0.885930  | 0.105676  |
| C | 2.470009  | 0.750865  | -0.322244 |
| C | 4.735513  | -0.143086 | 0.202871  |
| C | 5.642820  | -0.277709 | -0.855003 |
| C | 4.760993  | -0.944676 | 1.352160  |
| C | 6.618300  | -1.270862 | -0.734384 |
| C | 5.754021  | -1.925028 | 1.420182  |
| C | 6.685243  | -2.103742 | 0.388946  |
| H | 7.335589  | -1.400907 | -1.540333 |
| H | 5.801046  | -2.562643 | 2.299038  |
| C | 5.539346  | 0.598920  | -2.074087 |
| H | 4.586183  | 0.414773  | -2.582342 |
| H | 5.573988  | 1.661050  | -1.808028 |
| H | 6.351976  | 0.393302  | -2.774241 |
| C | 7.719214  | -3.197850 | 0.476729  |
| H | 8.083833  | -3.322074 | 1.501210  |
| H | 7.290609  | -4.158822 | 0.166045  |
| H | 8.575770  | -2.995023 | -0.172431 |
| C | 3.758855  | -0.756397 | 2.462104  |
| H | 3.739062  | 0.281920  | 2.810925  |
| H | 2.745231  | -1.006288 | 2.128287  |
| H | 3.997360  | -1.397530 | 3.313548  |
| C | 1.854845  | -0.476155 | -0.962494 |
| O | 2.484573  | -0.963257 | -1.910497 |
| C | 0.571156  | -0.878810 | -0.458882 |
| C | -0.251703 | -1.731924 | -1.241926 |
| C | 0.062579  | -0.415839 | 0.787672  |
| C | -1.530636 | -2.038590 | -0.843890 |
| H | 0.138334  | -2.100295 | -2.185999 |
| C | -1.207295 | -0.739849 | 1.196030  |
| H | 0.684634  | 0.194737  | 1.436546  |
| C | -2.075161 | -1.526225 | 0.376875  |
| H | -2.167056 | -2.647445 | -1.476998 |
| H | -1.581509 | -0.366950 | 2.144455  |
| C | -3.453285 | -1.667453 | 0.669594  |
| H | -3.790162 | -1.407430 | 1.669492  |
| H | -3.976384 | -2.508353 | 0.224030  |
| C | -4.406418 | -0.318540 | -0.640686 |
| C | -5.814792 | -0.568050 | -0.122134 |
| C | -6.322383 | -0.063073 | 1.085766  |
| C | -6.647095 | -1.367631 | -0.918211 |
| C | -7.629867 | -0.350598 | 1.479439  |

|   |           |           |           |
|---|-----------|-----------|-----------|
| H | -5.701542 | 0.554652  | 1.723492  |
| C | -7.950291 | -1.662658 | -0.520042 |
| H | -6.246345 | -1.743504 | -1.853685 |
| C | -8.449406 | -1.153638 | 0.681811  |
| H | -8.008382 | 0.052533  | 2.415072  |
| H | -8.579747 | -2.285224 | -1.150596 |
| H | -9.465641 | -1.378819 | 0.993210  |
| C | -3.770303 | 1.017409  | -0.164749 |
| F | -4.553691 | 2.066172  | -0.545983 |
| F | -2.561097 | 1.215679  | -0.729971 |
| F | -3.595852 | 1.157901  | 1.179557  |
| O | -4.111972 | -0.631353 | -1.820704 |

Vibrational frequencies

|           |          |          |
|-----------|----------|----------|
| -179.4986 | 14.4626  | 23.5150  |
| 24.5982   | 30.4806  | 40.9920  |
| 43.6609   | 55.3277  | 61.5258  |
| 70.3618   | 80.1812  | 87.8031  |
| 92.3138   | 107.2997 | 125.0842 |
| 130.7828  | 141.2616 | 147.8949 |
| 154.5491  | 168.0339 | 174.8062 |
| 179.7113  | 191.5662 | 198.1758 |
| 219.1446  | 237.7376 | 238.7983 |
| 253.2946  | 266.2868 | 275.2007 |

**TS4'**

|                                              |          |              |
|----------------------------------------------|----------|--------------|
| Zero-point correction=                       | 0.531373 |              |
| Thermal correction to Energy=                | 0.567351 |              |
| Thermal correction to Enthalpy=              | 0.568296 |              |
| Thermal correction to Gibbs Free Energy=     | 0.459418 |              |
| Sum of electronic and zero-point Energies=   |          | -2234.670899 |
| Sum of electronic and thermal Energies=      |          | -2234.634920 |
| Sum of electronic and thermal Enthalpies=    |          | -2234.633976 |
| Sum of electronic and thermal Free Energies= |          | -2234.742853 |

Cartesian coordinates

|   |           |          |           |
|---|-----------|----------|-----------|
| C | 0.359335  | 2.866787 | -0.709416 |
| C | 2.590187  | 3.210354 | 0.040925  |
| C | 2.004103  | 4.584096 | -0.004731 |
| C | 0.481072  | 4.273381 | -0.077337 |
| H | 0.320811  | 2.889067 | -1.801390 |
| H | -0.472991 | 2.277307 | -0.329129 |
| H | 2.283319  | 5.186573 | 0.861307  |
| H | 2.357056  | 5.098539 | -0.905150 |

|   |           |           |           |
|---|-----------|-----------|-----------|
| H | 0.064492  | 4.249066  | 0.933074  |
| H | -0.065592 | 5.016797  | -0.657886 |
| N | 1.655479  | 2.274157  | -0.313713 |
| N | 3.749520  | 2.652513  | 0.289645  |
| N | 3.525034  | 1.313281  | 0.058427  |
| C | 2.256938  | 1.074537  | -0.308035 |
| C | 4.554493  | 0.331590  | 0.295285  |
| C | 5.481050  | 0.082763  | -0.725067 |
| C | 4.563745  | -0.332492 | 1.529080  |
| C | 6.462128  | -0.877963 | -0.470655 |
| C | 5.564181  | -1.287170 | 1.729260  |
| C | 6.516412  | -1.573073 | 0.743881  |
| H | 7.193830  | -1.095657 | -1.243851 |
| H | 5.597131  | -1.820287 | 2.675496  |
| C | 5.385334  | 0.787911  | -2.051377 |
| H | 6.241680  | 0.546444  | -2.685095 |
| H | 4.473511  | 0.474686  | -2.572526 |
| H | 5.342447  | 1.875270  | -1.930355 |
| C | 7.558669  | -2.638446 | 0.972449  |
| H | 8.472822  | -2.434375 | 0.407120  |
| H | 7.818621  | -2.724223 | 2.031689  |
| H | 7.184009  | -3.616891 | 0.646968  |
| C | 3.526741  | -0.041035 | 2.583189  |
| H | 3.769524  | -0.550427 | 3.518253  |
| H | 3.453431  | 1.032971  | 2.786772  |
| H | 2.535743  | -0.384160 | 2.262771  |
| C | 1.704481  | -0.257818 | -0.697267 |
| O | 2.418732  | -0.903454 | -1.513024 |
| C | 0.436887  | -0.636917 | -0.178703 |
| C | -0.316579 | -1.650848 | -0.837754 |
| C | -0.139833 | 0.007253  | 0.957129  |
| C | -1.597634 | -1.938455 | -0.439518 |
| H | 0.117303  | -2.147773 | -1.699106 |
| C | -1.411636 | -0.301424 | 1.364563  |
| H | 0.438589  | 0.734421  | 1.519335  |
| C | -2.204953 | -1.252674 | 0.656347  |
| H | -2.191826 | -2.660251 | -0.987833 |
| H | -1.843883 | 0.204174  | 2.221889  |
| C | -3.602002 | -1.397073 | 0.904702  |
| H | -3.970157 | -0.994553 | 1.845366  |
| H | -4.036696 | -2.359144 | 0.646461  |
| C | -4.518602 | -0.438662 | -0.519905 |
| C | -5.961088 | -0.615603 | -0.025988 |
| C | -6.514838 | 0.055268  | 1.074924  |

|    |           |           |           |
|----|-----------|-----------|-----------|
| C  | -6.759714 | -1.524685 | -0.730771 |
| C  | -7.838603 | -0.176036 | 1.452864  |
| H  | -5.918411 | 0.762974  | 1.638689  |
| C  | -8.079581 | -1.763756 | -0.348241 |
| H  | -6.319218 | -2.028324 | -1.584694 |
| C  | -8.626259 | -1.088273 | 0.745907  |
| H  | -8.254663 | 0.356845  | 2.303854  |
| H  | -8.684329 | -2.472888 | -0.907553 |
| H  | -9.655284 | -1.269202 | 1.044067  |
| C  | -3.989375 | 1.015885  | -0.328420 |
| F  | -3.862102 | 1.440682  | 0.963904  |
| F  | -4.821079 | 1.906640  | -0.931530 |
| F  | -2.774769 | 1.176503  | -0.897997 |
| O  | -4.203205 | -0.933462 | -1.643749 |
| H  | 2.583917  | -2.372389 | -1.247624 |
| Cl | 2.867150  | -3.673993 | -0.915916 |

#### Vibrational frequencies

|           |          |          |
|-----------|----------|----------|
| -306.6613 | 13.9067  | 16.9684  |
| 21.8325   | 26.2530  | 29.1039  |
| 35.9773   | 47.5426  | 48.1379  |
| 52.3110   | 57.6184  | 65.8118  |
| 75.2779   | 78.5089  | 95.2928  |
| 101.8088  | 119.9281 | 134.1744 |
| 144.5292  | 150.1190 | 161.8300 |
| 176.3423  | 181.8662 | 190.7535 |
| 205.2916  | 209.7724 | 227.9318 |
| 232.8480  | 247.3378 | 251.2925 |

#### M4

|                                              |          |              |
|----------------------------------------------|----------|--------------|
| Zero-point correction=                       | 0.524153 |              |
| Thermal correction to Energy=                | 0.557856 |              |
| Thermal correction to Enthalpy=              | 0.558800 |              |
| Thermal correction to Gibbs Free Energy=     | 0.457803 |              |
| Sum of electronic and zero-point Energies=   |          | -1773.861047 |
| Sum of electronic and thermal Energies=      |          | -1773.827344 |
| Sum of electronic and thermal Enthalpies=    |          | -1773.826400 |
| Sum of electronic and thermal Free Energies= |          | -1773.927397 |

#### Cartesian coordinates

|   |          |          |           |
|---|----------|----------|-----------|
| C | 0.630482 | 2.571218 | -0.516112 |
| C | 2.838803 | 2.779822 | 0.350739  |
| C | 2.266746 | 4.154926 | 0.474093  |
| C | 0.744975 | 3.880272 | 0.300966  |

|   |           |           |           |
|---|-----------|-----------|-----------|
| H | 0.614003  | 2.739787  | -1.595446 |
| H | -0.212919 | 1.943288  | -0.233185 |
| H | 2.514481  | 4.630440  | 1.424368  |
| H | 2.662899  | 4.781657  | -0.332500 |
| H | 0.287018  | 3.731242  | 1.282093  |
| H | 0.230711  | 4.702290  | -0.197231 |
| N | 1.914722  | 1.917908  | -0.177705 |
| N | 3.982315  | 2.175938  | 0.560613  |
| N | 3.758136  | 0.888252  | 0.122262  |
| C | 2.508225  | 0.724335  | -0.329662 |
| C | 4.788926  | -0.113389 | 0.228397  |
| C | 5.716111  | -0.212969 | -0.817184 |
| C | 4.819744  | -0.920926 | 1.372570  |
| C | 6.716860  | -1.178199 | -0.688675 |
| C | 5.840933  | -1.872322 | 1.448900  |
| C | 6.791392  | -2.016904 | 0.431035  |
| H | 7.451481  | -1.280178 | -1.483050 |
| H | 5.893958  | -2.512851 | 2.325006  |
| C | 5.612203  | 0.677092  | -2.026579 |
| H | 4.673332  | 0.482294  | -2.556950 |
| H | 5.620511  | 1.735945  | -1.745656 |
| H | 6.440302  | 0.498148  | -2.715649 |
| C | 7.861754  | -3.074946 | 0.523217  |
| H | 7.535771  | -3.997619 | 0.026984  |
| H | 8.785863  | -2.752324 | 0.034172  |
| H | 8.090144  | -3.325244 | 1.563304  |
| C | 3.799146  | -0.769565 | 2.471468  |
| H | 3.736190  | 0.267279  | 2.819315  |
| H | 2.798853  | -1.059210 | 2.129010  |
| H | 4.053444  | -1.400351 | 3.325988  |
| C | 1.934476  | -0.514815 | -0.987008 |
| O | 2.596572  | -1.023031 | -1.885939 |
| C | 0.604735  | -0.910828 | -0.547741 |
| C | -0.229233 | -1.621883 | -1.436258 |
| C | 0.104481  | -0.532878 | 0.717455  |
| C | -1.544877 | -1.883618 | -1.095535 |
| H | 0.162828  | -1.906085 | -2.407863 |
| C | -1.203068 | -0.827715 | 1.061753  |
| H | 0.738497  | -0.008221 | 1.425850  |
| C | -2.063032 | -1.473668 | 0.153399  |
| H | -2.220898 | -2.349231 | -1.802049 |
| H | -1.589686 | -0.515422 | 2.026919  |
| C | -3.515192 | -1.576444 | 0.420836  |
| H | -3.733851 | -1.449612 | 1.483766  |



|   |           |           |           |
|---|-----------|-----------|-----------|
| H | -3.921876 | -2.533663 | 0.086037  |
| C | -4.358369 | -0.509165 | -0.504191 |
| C | -5.835455 | -0.638004 | -0.001076 |
| C | -6.263681 | -0.366909 | 1.306949  |
| C | -6.775672 | -1.089220 | -0.931273 |
| C | -7.600725 | -0.545010 | 1.670941  |
| H | -5.555637 | -0.004513 | 2.045260  |
| C | -8.112312 | -1.274003 | -0.571761 |
| H | -6.412160 | -1.283204 | -1.935735 |
| C | -8.531070 | -1.002410 | 0.733348  |
| H | -7.916124 | -0.326680 | 2.688438  |
| H | -8.829144 | -1.627124 | -1.309508 |
| H | -9.570598 | -1.143478 | 1.017734  |
| C | -3.853397 | 0.924993  | -0.120909 |
| F | -4.708546 | 1.892539  | -0.540500 |
| F | -2.654919 | 1.212037  | -0.694433 |
| F | -3.672137 | 1.145259  | 1.225267  |
| O | -4.191152 | -0.712190 | -1.787967 |

#### Vibrational frequencies

|          |          |          |
|----------|----------|----------|
| 17.8295  | 26.3481  | 27.4542  |
| 33.2527  | 48.5517  | 52.3209  |
| 58.3016  | 64.7226  | 74.4243  |
| 80.7151  | 88.1387  | 103.5097 |
| 108.1629 | 119.6101 | 124.3287 |
| 146.2339 | 153.9987 | 160.2028 |
| 168.2756 | 173.8911 | 177.9514 |
| 196.3178 | 204.5318 | 228.7453 |
| 238.7571 | 244.9652 | 249.7667 |
| 260.0695 | 270.5457 | 281.5144 |

#### M04

|                                              |          |              |
|----------------------------------------------|----------|--------------|
| Zero-point correction=                       | 0.593477 |              |
| Thermal correction to Energy=                | 0.637499 |              |
| Thermal correction to Enthalpy=              | 0.638443 |              |
| Thermal correction to Gibbs Free Energy=     |          | 0.512668     |
| Sum of electronic and zero-point Energies=   |          | -2173.398294 |
| Sum of electronic and thermal Energies=      |          | -2173.354273 |
| Sum of electronic and thermal Enthalpies=    |          | -2173.353328 |
| Sum of electronic and thermal Free Energies= |          | -2173.479103 |

#### Cartesian coordinates

|   |          |          |           |
|---|----------|----------|-----------|
| C | 1.301896 | 1.914294 | -1.138070 |
| C | 3.573352 | 2.077442 | -0.459518 |

|   |           |           |           |
|---|-----------|-----------|-----------|
| C | 3.115894  | 3.491664  | -0.536077 |
| C | 1.813663  | 3.358683  | -1.380186 |
| H | 0.863198  | 1.439956  | -2.017509 |
| H | 0.616538  | 1.862070  | -0.281439 |
| H | 2.826590  | 3.806171  | 0.481001  |
| H | 3.861953  | 4.162768  | -0.965011 |
| H | 1.067674  | 4.076326  | -1.034925 |
| H | 2.028813  | 3.509616  | -2.442943 |
| N | 2.552508  | 1.221412  | -0.772462 |
| N | 4.661218  | 1.414930  | -0.145754 |
| N | 4.294107  | 0.094600  | -0.274913 |
| C | 3.006353  | -0.029717 | -0.635243 |
| C | 5.276592  | -0.941913 | -0.073595 |
| C | 6.164930  | -1.208522 | -1.129826 |
| C | 5.323385  | -1.613188 | 1.153071  |
| C | 7.145980  | -2.175434 | -0.915992 |
| C | 6.328737  | -2.578235 | 1.313115  |
| C | 7.246528  | -2.866363 | 0.301047  |
| H | 7.845070  | -2.400868 | -1.717720 |
| H | 6.389972  | -3.112285 | 2.257979  |
| C | 6.027211  | -0.505842 | -2.454709 |
| H | 6.832590  | -0.792414 | -3.135370 |
| H | 5.072309  | -0.775015 | -2.920757 |
| H | 6.045388  | 0.582761  | -2.340040 |
| C | 8.332254  | -3.895933 | 0.497297  |
| H | 9.324947  | -3.432108 | 0.453662  |
| H | 8.239271  | -4.402251 | 1.462134  |
| H | 8.300735  | -4.657565 | -0.290354 |
| C | 4.318245  | -1.352305 | 2.243273  |
| H | 3.423385  | -1.968321 | 2.085092  |
| H | 4.730499  | -1.624307 | 3.219170  |
| H | 3.978171  | -0.312794 | 2.267982  |
| C | 2.322318  | -1.331900 | -0.978535 |
| O | 2.973011  | -2.120115 | -1.662866 |
| C | 0.953194  | -1.540768 | -0.516707 |
| C | 0.217891  | -2.616261 | -1.066425 |
| C | 0.351267  | -0.713943 | 0.455274  |
| C | -1.079461 | -2.857845 | -0.653362 |
| H | 0.687156  | -3.239147 | -1.821808 |
| C | -0.959024 | -0.960590 | 0.850394  |
| H | 0.893576  | 0.101369  | 0.928290  |
| C | -1.691716 | -2.035853 | 0.321260  |
| H | -1.675090 | -3.648532 | -1.093999 |
| H | -1.409993 | -0.293538 | 1.578567  |

|    |           |           |           |
|----|-----------|-----------|-----------|
| C  | -3.104436 | -2.299659 | 0.722366  |
| H  | -3.359253 | -1.736194 | 1.623967  |
| H  | -3.241310 | -3.364413 | 0.935225  |
| C  | -4.166908 | -2.037118 | -0.471140 |
| C  | -5.576218 | -2.340562 | 0.150709  |
| C  | -6.113679 | -1.717990 | 1.287837  |
| C  | -6.324753 | -3.339697 | -0.478049 |
| C  | -7.369200 | -2.089276 | 1.778067  |
| H  | -5.559119 | -0.933260 | 1.792504  |
| C  | -7.578307 | -3.716895 | 0.008117  |
| H  | -5.875506 | -3.796006 | -1.355388 |
| C  | -8.106935 | -3.091823 | 1.141141  |
| H  | -7.771170 | -1.595841 | 2.660113  |
| H  | -8.145027 | -4.496797 | -0.495994 |
| H  | -9.082225 | -3.381461 | 1.524454  |
| C  | -4.128027 | -0.505422 | -0.769063 |
| F  | -4.168650 | 0.310370  | 0.344723  |
| F  | -5.160325 | -0.100173 | -1.552823 |
| F  | -2.995739 | -0.142719 | -1.429094 |
| O  | -3.900266 | -2.707442 | -1.571619 |
| C  | 1.629364  | 0.605341  | 3.367752  |
| H  | 0.581145  | 0.937417  | 3.333441  |
| H  | 1.637212  | -0.496357 | 3.356342  |
| H  | 2.053205  | 0.913588  | 4.345278  |
| O  | 2.350839  | 1.114446  | 2.276551  |
| H  | 1.969137  | 2.097012  | 2.126228  |
| C  | 0.248142  | 3.401464  | 1.463356  |
| O  | -0.247923 | 4.475369  | 0.969998  |
| O  | 1.474571  | 3.416592  | 1.954096  |
| O  | -0.402476 | 2.275535  | 1.458997  |
| Cs | -2.577373 | 3.067208  | -0.549423 |

Vibrational frequencies

|          |          |          |
|----------|----------|----------|
| 19.7069  | 22.8296  | 25.8993  |
| 32.1404  | 36.4252  | 39.2951  |
| 40.2070  | 49.5659  | 55.9846  |
| 58.9950  | 60.3362  | 65.6942  |
| 67.8288  | 77.3586  | 79.8714  |
| 84.8761  | 92.6272  | 95.4779  |
| 100.1733 | 105.6835 | 110.0937 |
| 119.4801 | 125.2037 | 128.7237 |
| 147.1896 | 153.8414 | 163.9670 |
| 166.1507 | 170.5340 | 179.3785 |

**TS5**

|                                              |              |              |
|----------------------------------------------|--------------|--------------|
| Zero-point correction=                       | 0.588962     |              |
| Thermal correction to Energy=                | 0.632867     |              |
| Thermal correction to Enthalpy=              | 0.633811     |              |
| Thermal correction to Gibbs Free Energy=     | 0.507348     |              |
| Sum of electronic and zero-point Energies=   |              | -2173.392538 |
| Sum of electronic and thermal Energies=      | -2173.348634 |              |
| Sum of electronic and thermal Enthalpies=    |              | -2173.347690 |
| Sum of electronic and thermal Free Energies= |              | -2173.474153 |

## Cartesian coordinates

|   |           |           |           |
|---|-----------|-----------|-----------|
| C | -1.113635 | 1.090851  | 1.886894  |
| C | -3.465761 | 1.366468  | 1.954082  |
| C | -2.972677 | 2.423335  | 2.883604  |
| C | -1.443550 | 2.423211  | 2.606138  |
| H | -0.737384 | 0.307326  | 2.551891  |
| H | -0.420665 | 1.239222  | 1.067377  |
| H | -3.437465 | 3.390365  | 2.680565  |
| H | -3.216638 | 2.147022  | 3.913534  |
| H | -1.178544 | 3.235106  | 1.925164  |
| H | -0.867777 | 2.506890  | 3.532933  |
| N | -2.439861 | 0.667710  | 1.387064  |
| N | -4.629217 | 0.889362  | 1.589984  |
| N | -4.312754 | -0.153274 | 0.741131  |
| C | -2.968374 | -0.290373 | 0.599784  |
| C | -5.405598 | -0.934851 | 0.220053  |
| C | -5.730593 | -2.141828 | 0.859108  |
| C | -6.178782 | -0.396779 | -0.820627 |
| C | -6.837043 | -2.856690 | 0.376566  |
| C | -7.273643 | -1.152902 | -1.267900 |
| C | -7.611990 | -2.387453 | -0.695060 |
| H | -7.100487 | -3.792530 | 0.858704  |
| H | -7.877703 | -0.760348 | -2.079636 |
| C | -4.931438 | -2.667046 | 2.027062  |
| H | -5.455038 | -3.501973 | 2.505096  |
| H | -3.949491 | -3.021475 | 1.701855  |
| H | -4.774140 | -1.892058 | 2.783277  |
| C | -8.770101 | -3.192156 | -1.222107 |
| H | -9.286814 | -3.724052 | -0.408330 |
| H | -9.498780 | -2.563940 | -1.735487 |
| H | -8.427548 | -3.946406 | -1.936564 |
| C | -5.875393 | 0.948753  | -1.418405 |
| H | -6.456891 | 1.102847  | -2.335484 |
| H | -6.144597 | 1.758598  | -0.720318 |

|    |           |           |           |
|----|-----------|-----------|-----------|
| H  | -4.802166 | 1.051794  | -1.640973 |
| C  | -2.292847 | -1.370081 | -0.205351 |
| O  | -2.987683 | -2.306093 | -0.580271 |
| C  | -0.809437 | -1.395696 | -0.365629 |
| C  | -0.179649 | -2.633106 | -0.094208 |
| C  | -0.036580 | -0.326684 | -0.846840 |
| C  | 1.191485  | -2.786980 | -0.258056 |
| H  | -0.785567 | -3.463129 | 0.268789  |
| C  | 1.329793  | -0.511662 | -1.053939 |
| H  | -0.482598 | 0.624927  | -1.112399 |
| C  | 1.975519  | -1.727879 | -0.767871 |
| H  | 1.681765  | -3.714502 | 0.000854  |
| H  | 1.903903  | 0.307611  | -1.460766 |
| C  | 3.444473  | -1.911207 | -0.978622 |
| H  | 3.831041  | -1.120722 | -1.624938 |
| H  | 3.631205  | -2.864827 | -1.476986 |
| C  | 4.311541  | -2.033107 | 0.386110  |
| C  | 5.795306  | -2.297656 | -0.089421 |
| C  | 6.543910  | -1.468512 | -0.929389 |
| C  | 6.362894  | -3.498004 | 0.358697  |
| C  | 7.840428  | -1.834994 | -1.315789 |
| H  | 6.132099  | -0.523857 | -1.287268 |
| C  | 7.656042  | -3.870989 | -0.024011 |
| H  | 5.751708  | -4.102942 | 1.011349  |
| C  | 8.402208  | -3.039019 | -0.861577 |
| H  | 8.410440  | -1.176440 | -1.966871 |
| H  | 8.084580  | -4.801428 | 0.334851  |
| H  | 9.407616  | -3.321968 | -1.167496 |
| C  | 4.301984  | -0.632304 | 1.083638  |
| F  | 4.591699  | 0.446619  | 0.257115  |
| F  | 5.217553  | -0.562583 | 2.085165  |
| F  | 3.109657  | -0.325355 | 1.639324  |
| O  | 3.846379  | -2.940482 | 1.219450  |
| C  | -2.318061 | 0.884157  | -3.109756 |
| H  | -1.478430 | 1.576284  | -3.276040 |
| H  | -1.998225 | -0.122449 | -3.424919 |
| H  | -3.140015 | 1.172429  | -3.809738 |
| O  | -2.732005 | 0.903340  | -1.767693 |
| H  | -2.344107 | 1.838147  | -1.255990 |
| C  | -0.726805 | 3.247070  | -0.672159 |
| O  | -0.243879 | 4.061154  | 0.194134  |
| O  | -1.982435 | 2.840201  | -0.515151 |
| O  | -0.032040 | 2.797995  | -1.664680 |
| Cs | 2.694562  | 3.405410  | -0.342439 |

Vibrational frequencies

|           |          |          |
|-----------|----------|----------|
| -109.4316 | 16.0965  | 20.6936  |
| 23.7492   | 29.4683  | 29.9016  |
| 36.9886   | 41.1671  | 46.1422  |
| 49.4413   | 54.6143  | 57.0754  |
| 60.7008   | 62.3677  | 71.3469  |
| 74.2540   | 85.8704  | 92.4444  |
| 99.0062   | 106.9577 | 113.5558 |
| 117.0608  | 121.1223 | 125.9740 |
| 145.6009  | 148.8055 | 157.7369 |
| 164.3859  | 170.0642 | 173.5068 |

**M5**

|                                              |          |              |
|----------------------------------------------|----------|--------------|
| Zero-point correction=                       | 0.565634 |              |
| Thermal correction to Energy=                | 0.602210 |              |
| Thermal correction to Enthalpy=              | 0.603155 |              |
| Thermal correction to Gibbs Free Energy=     |          | 0.496366     |
| Sum of electronic and zero-point Energies=   |          | -1889.064993 |
| Sum of electronic and thermal Energies=      |          | -1889.028417 |
| Sum of electronic and thermal Enthalpies=    |          | -1889.027472 |
| Sum of electronic and thermal Free Energies= |          | -1889.134261 |

Cartesian coordinates

|   |           |           |           |
|---|-----------|-----------|-----------|
| C | -0.100580 | 1.646975  | -0.925590 |
| C | 1.957507  | 2.607590  | -0.241918 |
| C | 1.033138  | 3.776777  | -0.362319 |
| C | -0.353537 | 3.072896  | -0.386220 |
| H | -0.165923 | 1.581998  | -2.014280 |
| H | -0.753869 | 0.901705  | -0.485637 |
| H | 1.146132  | 4.486084  | 0.459739  |
| H | 1.232539  | 4.310554  | -1.298431 |
| H | -0.750789 | 2.999048  | 0.629330  |
| H | -1.083811 | 3.604813  | -0.997130 |
| N | 1.307284  | 1.435929  | -0.532060 |
| N | 3.209283  | 2.395995  | 0.055164  |
| N | 3.336815  | 1.013880  | -0.058046 |
| C | 2.184700  | 0.418336  | -0.419412 |
| C | 4.629590  | 0.434872  | 0.200345  |
| C | 5.516406  | 0.285304  | -0.870020 |
| C | 4.960394  | 0.096091  | 1.519753  |
| C | 6.788087  | -0.228471 | -0.584478 |
| C | 6.239486  | -0.409473 | 1.754019  |
| C | 7.166581  | -0.576887 | 0.715071  |

|   |           |           |           |
|---|-----------|-----------|-----------|
| H | 7.493988  | -0.359722 | -1.400738 |
| H | 6.518837  | -0.686107 | 2.768006  |
| C | 5.091853  | 0.632908  | -2.271642 |
| H | 4.206888  | 0.038321  | -2.537366 |
| H | 4.817513  | 1.691793  | -2.350968 |
| H | 5.896259  | 0.434981  | -2.985180 |
| C | 8.543517  | -1.120469 | 1.009280  |
| H | 8.486236  | -2.080520 | 1.534895  |
| H | 9.122241  | -1.270609 | 0.093559  |
| H | 9.108254  | -0.436676 | 1.654562  |
| C | 3.943309  | 0.223886  | 2.621191  |
| H | 3.510336  | 1.229372  | 2.657557  |
| H | 3.124063  | -0.481706 | 2.444308  |
| H | 4.386401  | 0.005316  | 3.596057  |
| C | 1.983827  | -1.060493 | -0.888527 |
| O | 2.373549  | -1.141968 | -2.123487 |
| C | 0.512293  | -1.436033 | -0.604601 |
| C | -0.385210 | -1.521665 | -1.670604 |
| C | 0.018439  | -1.524333 | 0.702986  |
| C | -1.756170 | -1.630463 | -1.438776 |
| H | 0.017396  | -1.445800 | -2.676300 |
| C | -1.352377 | -1.635706 | 0.934716  |
| H | 0.715401  | -1.474890 | 1.534675  |
| C | -2.265355 | -1.661090 | -0.130598 |
| H | -2.460079 | -1.626252 | -2.263584 |
| H | -1.728522 | -1.657665 | 1.955464  |
| C | -3.745091 | -1.603900 | 0.098256  |
| H | -4.000053 | -1.952521 | 1.104473  |
| H | -4.262342 | -2.251645 | -0.617065 |
| C | -4.350721 | -0.141527 | -0.198671 |
| C | -5.908904 | -0.299502 | -0.041619 |
| C | -6.564387 | -0.780637 | 1.102031  |
| C | -6.680163 | 0.031774  | -1.158878 |
| C | -7.954575 | -0.925164 | 1.121533  |
| H | -5.992791 | -1.034350 | 1.989053  |
| C | -8.069005 | -0.112159 | -1.147425 |
| H | -6.133228 | 0.400202  | -2.022309 |
| C | -8.713796 | -0.593315 | -0.004408 |
| H | -8.445560 | -1.298649 | 2.017376  |
| H | -8.651009 | 0.150481  | -2.028321 |
| H | -9.794787 | -0.708001 | 0.010625  |
| C | -3.897555 | 0.809251  | 0.959747  |
| F | -4.589547 | 1.980271  | 0.955630  |
| F | -2.586011 | 1.160394  | 0.867529  |

|   |           |           |           |
|---|-----------|-----------|-----------|
| F | -4.035838 | 0.301384  | 2.232512  |
| O | -3.970196 | 0.363364  | -1.356570 |
| C | 3.263482  | -3.028548 | -0.309103 |
| H | 2.441314  | -3.760829 | -0.374265 |
| H | 3.989534  | -3.387000 | 0.428317  |
| H | 3.745755  | -2.967492 | -1.291808 |
| O | 2.819332  | -1.763179 | 0.130586  |

#### Vibrational frequencies

|          |          |          |
|----------|----------|----------|
| 18.2714  | 25.0636  | 34.1708  |
| 39.0929  | 42.2935  | 48.8877  |
| 52.9545  | 58.6160  | 65.3965  |
| 72.4966  | 79.4401  | 86.5530  |
| 91.2818  | 99.3228  | 114.7283 |
| 133.2108 | 137.1748 | 146.2977 |
| 149.6089 | 157.3675 | 177.4816 |
| 184.9263 | 191.1229 | 197.4085 |
| 210.8749 | 223.6642 | 232.7989 |
| 242.1406 | 243.1716 | 250.8203 |

#### M05

|                                              |          |              |
|----------------------------------------------|----------|--------------|
| Zero-point correction=                       | 0.607991 |              |
| Thermal correction to Energy=                | 0.648826 |              |
| Thermal correction to Enthalpy=              | 0.649771 |              |
| Thermal correction to Gibbs Free Energy=     |          | 0.533117     |
| Sum of electronic and zero-point Energies=   |          | -2154.111136 |
| Sum of electronic and thermal Energies=      |          | -2154.070300 |
| Sum of electronic and thermal Enthalpies=    |          | -2154.069356 |
| Sum of electronic and thermal Free Energies= |          | -2154.186009 |

#### Cartesian coordinates

|   |           |          |           |
|---|-----------|----------|-----------|
| C | 0.326294  | 1.713171 | 0.036511  |
| C | 2.446281  | 2.376909 | 0.877083  |
| C | 1.556259  | 3.541184 | 1.176581  |
| C | 0.142626  | 2.918473 | 0.987278  |
| H | 0.182189  | 1.973991 | -1.011108 |
| H | -0.316582 | 0.872737 | 0.277142  |
| H | 1.721254  | 3.949501 | 2.175727  |
| H | 1.747962  | 4.339630 | 0.450725  |
| H | -0.229352 | 2.559232 | 1.951403  |
| H | -0.584330 | 3.621283 | 0.577966  |
| N | 1.746562  | 1.373881 | 0.257836  |
| N | 3.706418  | 2.065375 | 1.008536  |
| N | 3.786402  | 0.800035 | 0.432540  |



|   |           |           |           |
|---|-----------|-----------|-----------|
| C | 2.598197  | 0.374965  | -0.038666 |
| C | 5.077519  | 0.167214  | 0.357190  |
| C | 5.896413  | 0.468340  | -0.736916 |
| C | 5.481902  | -0.672833 | 1.403841  |
| C | 7.166514  | -0.120086 | -0.772329 |
| C | 6.758043  | -1.233224 | 1.324193  |
| C | 7.612150  | -0.970515 | 0.243795  |
| H | 7.818712  | 0.094460  | -1.615150 |
| H | 7.093636  | -1.892769 | 2.121097  |
| C | 5.402245  | 1.364505  | -1.839803 |
| H | 4.510216  | 0.909983  | -2.289715 |
| H | 5.116696  | 2.349556  | -1.452572 |
| H | 6.168813  | 1.507414  | -2.606039 |
| C | 8.976683  | -1.612519 | 0.179685  |
| H | 8.897308  | -2.681191 | -0.055465 |
| H | 9.603841  | -1.150217 | -0.588018 |
| H | 9.499216  | -1.534015 | 1.139365  |
| C | 4.547529  | -0.989655 | 2.539952  |
| H | 4.138567  | -0.079435 | 2.991855  |
| H | 3.705692  | -1.579087 | 2.161854  |
| H | 5.054989  | -1.562507 | 3.320376  |
| C | 2.351459  | -0.838618 | -0.993546 |
| O | 2.776496  | -0.511082 | -2.173325 |
| C | 0.858257  | -1.236840 | -0.901315 |
| C | 0.003861  | -0.907632 | -1.954714 |
| C | 0.316704  | -1.825599 | 0.247327  |
| C | -1.370377 | -1.128325 | -1.853937 |
| H | 0.441720  | -0.454353 | -2.838457 |
| C | -1.056189 | -2.044735 | 0.349836  |
| H | 0.979393  | -2.101604 | 1.061787  |
| C | -1.924450 | -1.685413 | -0.692900 |
| H | -2.030514 | -0.846360 | -2.668755 |
| H | -1.468511 | -2.479492 | 1.256787  |
| C | -3.414553 | -1.874261 | -0.555486 |
| H | -3.623491 | -2.674089 | 0.160590  |
| H | -3.843387 | -2.177858 | -1.515488 |
| C | -4.227358 | -0.588160 | -0.163228 |
| C | -5.710444 | -1.012432 | -0.010409 |
| C | -6.151585 | -1.907552 | 0.975971  |
| C | -6.641393 | -0.518013 | -0.929264 |
| C | -7.492575 | -2.289430 | 1.043120  |
| H | -5.450715 | -2.301835 | 1.703642  |
| C | -7.982842 | -0.902168 | -0.866976 |
| H | -6.289089 | 0.168263  | -1.690784 |

|   |           |           |           |
|---|-----------|-----------|-----------|
| C | -8.415117 | -1.789148 | 0.120542  |
| H | -7.816254 | -2.979528 | 1.817935  |
| H | -8.690431 | -0.506298 | -1.591003 |
| H | -9.458511 | -2.088225 | 0.172113  |
| C | -3.734186 | -0.048360 | 1.208910  |
| F | -4.609250 | 0.833623  | 1.747767  |
| F | -2.553147 | 0.610691  | 1.107097  |
| F | -3.541276 | -1.024451 | 2.144973  |
| O | -4.079235 | 0.400292  | -1.102318 |
| C | 3.557317  | -2.934129 | -1.119823 |
| H | 2.726157  | -3.575324 | -1.457629 |
| H | 4.257753  | -3.549024 | -0.544962 |
| H | 4.066325  | -2.538171 | -2.005940 |
| O | 3.122153  | -1.895606 | -0.267441 |
| C | -3.026990 | 3.153480  | -0.784142 |
| O | -2.576396 | 4.276002  | -0.607446 |
| O | -4.286399 | 2.831639  | -0.484713 |
| O | -2.283094 | 2.166507  | -1.303960 |
| H | -4.411947 | 1.823936  | -0.678609 |
| H | -2.817301 | 1.293998  | -1.258132 |

#### Vibrational frequencies

|          |          |          |
|----------|----------|----------|
| 14.3254  | 23.4724  | 29.1686  |
| 34.1634  | 41.1814  | 42.1655  |
| 51.2157  | 54.2275  | 58.1139  |
| 75.9839  | 78.7457  | 82.7158  |
| 86.4515  | 93.8397  | 100.1810 |
| 104.1138 | 107.6077 | 109.3872 |
| 129.6841 | 133.1212 | 142.4138 |
| 149.7419 | 153.3422 | 158.9965 |
| 163.6896 | 171.1263 | 186.6273 |
| 188.0780 | 195.4211 | 203.9154 |

#### TS6

|                                              |              |              |
|----------------------------------------------|--------------|--------------|
| Zero-point correction=                       | 0.605218     |              |
| Thermal correction to Energy=                | 0.645571     |              |
| Thermal correction to Enthalpy=              | 0.646515     |              |
| Thermal correction to Gibbs Free Energy=     |              | 0.531522     |
| Sum of electronic and zero-point Energies=   |              | -2154.109591 |
| Sum of electronic and thermal Energies=      | -2154.069238 |              |
| Sum of electronic and thermal Enthalpies=    |              | -2154.068294 |
| Sum of electronic and thermal Free Energies= |              | -2154.183287 |

#### Cartesian coordinates

|   |           |           |           |
|---|-----------|-----------|-----------|
| C | -0.277854 | 0.972039  | -1.569407 |
| C | -2.213943 | 2.198048  | -0.947518 |
| C | -1.253631 | 3.247415  | -1.401549 |
| C | -0.199173 | 2.399795  | -2.165656 |
| H | 0.424152  | 0.820358  | -0.754538 |
| H | -0.162842 | 0.184616  | -2.310865 |
| H | -1.724677 | 4.018726  | -2.013719 |
| H | -0.778084 | 3.716875  | -0.532414 |
| H | -0.443957 | 2.366641  | -3.231274 |
| H | 0.801451  | 2.815110  | -2.044700 |
| N | -1.644466 | 0.953028  | -1.014677 |
| N | -3.427724 | 2.133580  | -0.469723 |
| N | -3.599144 | 0.779791  | -0.208716 |
| C | -2.513909 | 0.052777  | -0.521394 |
| C | -4.885106 | 0.341956  | 0.267498  |
| C | -5.154880 | 0.425015  | 1.639224  |
| C | -5.835150 | -0.067435 | -0.673637 |
| C | -6.439991 | 0.084125  | 2.063649  |
| C | -7.107871 | -0.405343 | -0.198521 |
| C | -7.427812 | -0.333633 | 1.160839  |
| H | -6.673853 | 0.135473  | 3.124297  |
| H | -7.864316 | -0.728106 | -0.909610 |
| C | -4.065562 | 0.803955  | 2.603986  |
| H | -3.282146 | 0.039736  | 2.549278  |
| H | -3.612680 | 1.767947  | 2.347619  |
| H | -4.442712 | 0.860800  | 3.628413  |
| C | -8.797581 | -0.728719 | 1.656533  |
| H | -8.788475 | -1.750312 | 2.057274  |
| H | -9.137121 | -0.070011 | 2.462724  |
| H | -9.540541 | -0.698355 | 0.853874  |
| C | -5.484968 | -0.156826 | -2.136229 |
| H | -5.144613 | 0.811014  | -2.522999 |
| H | -4.669734 | -0.874553 | -2.283953 |
| H | -6.348008 | -0.474109 | -2.727173 |
| C | -2.327701 | -1.475692 | -0.154058 |
| O | -3.035424 | -1.790237 | 0.872243  |
| C | -0.800376 | -1.714942 | 0.001865  |
| C | -0.218010 | -1.384135 | 1.230347  |
| C | 0.026712  | -2.179422 | -1.024849 |
| C | 1.161393  | -1.453448 | 1.408709  |
| H | -0.864603 | -1.055008 | 2.037606  |
| C | 1.409614  | -2.260016 | -0.842916 |
| H | -0.420216 | -2.443511 | -1.977761 |
| C | 2.001970  | -1.869353 | 0.365136  |

|   |           |           |           |
|---|-----------|-----------|-----------|
| H | 1.603837  | -1.159529 | 2.355975  |
| H | 2.042571  | -2.591740 | -1.662239 |
| C | 3.500901  | -1.842457 | 0.535783  |
| H | 3.976304  | -2.555621 | -0.142586 |
| H | 3.766763  | -2.137413 | 1.555486  |
| C | 4.159077  | -0.431277 | 0.351155  |
| C | 5.681526  | -0.582095 | 0.579732  |
| C | 6.497050  | -1.365859 | -0.250495 |
| C | 6.260246  | 0.052644  | 1.683021  |
| C | 7.860082  | -1.503230 | 0.016483  |
| H | 6.073792  | -1.862148 | -1.116878 |
| C | 7.623331  | -0.086928 | 1.953564  |
| H | 5.622475  | 0.652806  | 2.321701  |
| C | 8.429714  | -0.865154 | 1.121227  |
| H | 8.477125  | -2.110288 | -0.640676 |
| H | 8.054735  | 0.414724  | 2.815880  |
| H | 9.490561  | -0.973743 | 1.329651  |
| C | 3.933527  | 0.074406  | -1.100488 |
| F | 4.754595  | 1.102594  | -1.411359 |
| F | 2.670119  | 0.520291  | -1.296678 |
| F | 4.144334  | -0.890618 | -2.042083 |
| O | 3.595265  | 0.469639  | 1.233774  |
| C | -3.174337 | -3.424430 | -1.318544 |
| H | -2.345998 | -4.095611 | -1.038886 |
| H | -3.571170 | -3.750135 | -2.286218 |
| H | -3.955383 | -3.513541 | -0.554460 |
| O | -2.749250 | -2.083285 | -1.473464 |
| C | 2.003270  | 2.920531  | 0.667567  |
| O | 1.392774  | 3.942689  | 0.362153  |
| O | 3.297157  | 2.775843  | 0.632758  |
| O | 1.286218  | 1.835413  | 1.097493  |
| H | 3.587665  | 1.653011  | 0.904607  |
| H | 1.910363  | 1.076313  | 1.203451  |

Vibrational frequencies

|           |          |          |
|-----------|----------|----------|
| -820.8529 | 17.1724  | 29.6395  |
| 33.4653   | 37.2224  | 39.2838  |
| 44.4840   | 47.5988  | 51.1851  |
| 56.3519   | 60.6522  | 73.1388  |
| 85.9204   | 91.9136  | 95.6410  |
| 99.3659   | 103.0469 | 113.9395 |
| 124.8763  | 133.3630 | 142.2210 |
| 149.1288  | 153.9373 | 158.6479 |
| 171.8764  | 182.1422 | 189.1163 |

196.5402

203.5355

217.4594

**M6**

|                                              |          |              |
|----------------------------------------------|----------|--------------|
| Zero-point correction=                       | 0.579922 |              |
| Thermal correction to Energy=                | 0.616829 |              |
| Thermal correction to Enthalpy=              | 0.617774 |              |
| Thermal correction to Gibbs Free Energy=     |          | 0.509149     |
| Sum of electronic and zero-point Energies=   |          | -1889.577338 |
| Sum of electronic and thermal Energies=      |          | -1889.540430 |
| Sum of electronic and thermal Enthalpies=    |          | -1889.539486 |
| Sum of electronic and thermal Free Energies= |          | -1889.648110 |

## Cartesian coordinates

|   |           |           |           |
|---|-----------|-----------|-----------|
| C | -0.034255 | 1.745161  | -0.851968 |
| C | 2.039842  | 2.650548  | -0.140471 |
| C | 1.135311  | 3.838420  | -0.220910 |
| C | -0.263708 | 3.160589  | -0.272713 |
| H | -0.105855 | 1.710495  | -1.941794 |
| H | -0.695251 | 0.997214  | -0.425217 |
| H | 1.257387  | 4.515003  | 0.626789  |
| H | 1.345705  | 4.402654  | -1.136283 |
| H | -0.666355 | 3.066815  | 0.739513  |
| H | -0.978851 | 3.725383  | -0.872164 |
| N | 1.369693  | 1.499780  | -0.469240 |
| N | 3.286974  | 2.406440  | 0.149472  |
| N | 3.391756  | 1.027667  | -0.010459 |
| C | 2.230976  | 0.464958  | -0.392578 |
| C | 4.672859  | 0.414970  | 0.232265  |
| C | 5.566541  | 0.296953  | -0.837675 |
| C | 4.983837  | 0.009079  | 1.536386  |
| C | 6.823313  | -0.256205 | -0.566026 |
| C | 6.250842  | -0.534204 | 1.757151  |
| C | 7.183228  | -0.672173 | 0.719984  |
| H | 7.534332  | -0.364241 | -1.381186 |
| H | 6.514312  | -0.863637 | 2.759285  |
| C | 5.163705  | 0.720446  | -2.224825 |
| H | 4.272716  | 0.155196  | -2.528900 |
| H | 4.909457  | 1.786779  | -2.254282 |
| H | 5.972099  | 0.542698  | -2.938930 |
| C | 8.556067  | -1.233547 | 0.997083  |
| H | 8.519014  | -2.025856 | 1.751695  |
| H | 9.013610  | -1.643380 | 0.091796  |
| H | 9.227169  | -0.454374 | 1.380563  |
| C | 3.960833  | 0.105744  | 2.635469  |

|   |           |           |           |
|---|-----------|-----------|-----------|
| H | 3.548968  | 1.117460  | 2.717189  |
| H | 3.129381  | -0.574598 | 2.420503  |
| H | 4.392166  | -0.167940 | 3.601558  |
| C | 2.015304  | -0.990537 | -0.921975 |
| O | 2.424838  | -1.033298 | -2.151117 |
| C | 0.528185  | -1.353576 | -0.690851 |
| C | -0.322952 | -1.447509 | -1.791035 |
| C | -0.010453 | -1.458868 | 0.597017  |
| C | -1.699874 | -1.578827 | -1.610203 |
| H | 0.119307  | -1.377057 | -2.779619 |
| C | -1.386289 | -1.579269 | 0.778613  |
| H | 0.654961  | -1.415253 | 1.453811  |
| C | -2.253654 | -1.605685 | -0.323688 |
| H | -2.353268 | -1.640677 | -2.477844 |
| H | -1.800758 | -1.612732 | 1.782783  |
| C | -3.750785 | -1.597471 | -0.130054 |
| H | -4.020530 | -2.110902 | 0.794946  |
| H | -4.239233 | -2.142730 | -0.945372 |
| C | -4.405882 | -0.181293 | -0.129406 |
| C | -5.937182 | -0.308696 | -0.057413 |
| C | -6.556333 | -1.082178 | 0.935694  |
| C | -6.736514 | 0.354258  | -0.994864 |
| C | -7.945587 | -1.201038 | 0.976175  |
| H | -5.960355 | -1.584888 | 1.689184  |
| C | -8.126853 | 0.229565  | -0.956942 |
| H | -6.269058 | 0.974662  | -1.750859 |
| C | -8.736436 | -0.550072 | 0.026673  |
| H | -8.409152 | -1.803738 | 1.751880  |
| H | -8.731761 | 0.747437  | -1.695843 |
| H | -9.817838 | -0.646766 | 0.056849  |
| C | -3.930446 | 0.675484  | 1.066866  |
| F | -4.670745 | 1.796019  | 1.197043  |
| F | -2.645089 | 1.074180  | 0.955426  |
| F | -4.032601 | -0.015058 | 2.228113  |
| O | -3.986863 | 0.575891  | -1.254138 |
| C | 3.238663  | -3.008337 | -0.394227 |
| H | 2.406797  | -3.722614 | -0.510494 |
| H | 3.938841  | -3.406516 | 0.347067  |
| H | 3.748093  | -2.914380 | -1.359935 |
| O | 2.801752  | -1.752811 | 0.086507  |
| H | -4.090723 | 0.018586  | -2.039660 |

Vibrational frequencies

12.7713

18.3947

26.8470

|          |          |          |
|----------|----------|----------|
| 30.1897  | 38.4811  | 45.2845  |
| 47.3819  | 58.5935  | 63.1897  |
| 66.7337  | 78.6177  | 89.1212  |
| 90.3043  | 91.7374  | 113.1853 |
| 129.0804 | 132.2809 | 146.0337 |
| 153.2170 | 173.3956 | 181.7006 |
| 185.8184 | 197.3187 | 203.1514 |
| 210.6558 | 226.9231 | 235.8162 |

### TS7

|                                              |              |              |
|----------------------------------------------|--------------|--------------|
| Zero-point correction=                       | 0.579182     |              |
| Thermal correction to Energy=                | 0.615831     |              |
| Thermal correction to Enthalpy=              | 0.616775     |              |
| Thermal correction to Gibbs Free Energy=     |              | 0.508732     |
| Sum of electronic and zero-point Energies=   |              | -1889.574999 |
| Sum of electronic and thermal Energies=      | -1889.538350 |              |
| Sum of electronic and thermal Enthalpies=    |              | -1889.537406 |
| Sum of electronic and thermal Free Energies= |              | -1889.645449 |

### Cartesian coordinates

|   |           |           |           |
|---|-----------|-----------|-----------|
| C | 0.112679  | 1.632330  | 0.743744  |
| C | -1.954533 | 2.672945  | 0.242705  |
| C | -0.997112 | 3.814874  | 0.376032  |
| C | 0.373372  | 3.083512  | 0.275921  |
| H | 0.256008  | 1.503610  | 1.819674  |
| H | 0.706461  | 0.894582  | 0.212373  |
| H | -1.137287 | 4.574866  | -0.394929 |
| H | -1.125543 | 4.297153  | 1.351609  |
| H | 0.707101  | 3.067601  | -0.765261 |
| H | 1.148991  | 3.565681  | 0.872847  |
| N | -1.315219 | 1.472394  | 0.432589  |
| N | -3.223033 | 2.496148  | 0.003518  |
| N | -3.350014 | 1.102845  | 0.052901  |
| C | -2.199654 | 0.456919  | 0.311008  |
| C | -4.649677 | 0.531383  | -0.158474 |
| C | -5.497511 | 0.383288  | 0.947191  |
| C | -5.021421 | 0.156147  | -1.455590 |
| C | -6.769404 | -0.152098 | 0.719713  |
| C | -6.299713 | -0.380892 | -1.631874 |
| C | -7.188459 | -0.533550 | -0.560602 |
| H | -7.443421 | -0.280547 | 1.562853  |
| H | -6.608024 | -0.687243 | -2.628484 |
| C | -5.016790 | 0.729905  | 2.331745  |
| H | -4.176885 | 0.076247  | 2.595786  |

|   |           |           |           |
|---|-----------|-----------|-----------|
| H | -4.664953 | 1.765914  | 2.387137  |
| H | -5.813271 | 0.597414  | 3.068473  |
| C | -8.577104 | -1.078225 | -0.788480 |
| H | -9.271109 | -0.274104 | -1.064368 |
| H | -8.590183 | -1.811289 | -1.601121 |
| H | -8.973360 | -1.556932 | 0.112021  |
| C | -4.050071 | 0.273244  | -2.599817 |
| H | -3.591241 | 1.266615  | -2.639501 |
| H | -3.244312 | -0.458384 | -2.473595 |
| H | -4.543337 | 0.083490  | -3.556480 |
| C | -2.027196 | -1.400343 | 0.784472  |
| O | -2.503283 | -1.546572 | 1.932405  |
| C | -0.520160 | -1.545922 | 0.570500  |
| C | 0.311826  | -1.548908 | 1.689808  |
| C | 0.056912  | -1.614178 | -0.704980 |
| C | 1.700464  | -1.581989 | 1.541180  |
| H | -0.147096 | -1.511971 | 2.672362  |
| C | 1.440577  | -1.641825 | -0.854669 |
| H | -0.586544 | -1.631334 | -1.577781 |
| C | 2.285907  | -1.611905 | 0.266438  |
| H | 2.337680  | -1.591919 | 2.422302  |
| H | 1.876853  | -1.667564 | -1.849335 |
| C | 3.789031  | -1.571748 | 0.111890  |
| H | 4.097626  | -2.086305 | -0.800578 |
| H | 4.263084  | -2.086378 | 0.952241  |
| C | 4.410014  | -0.139780 | 0.107091  |
| C | 5.935518  | -0.249155 | 0.123634  |
| C | 6.620087  | -0.820387 | -0.959106 |
| C | 6.662667  | 0.177913  | 1.239674  |
| C | 8.007795  | -0.954801 | -0.925664 |
| H | 6.074770  | -1.152893 | -1.835435 |
| C | 8.052112  | 0.038944  | 1.271315  |
| H | 6.140386  | 0.617222  | 2.080578  |
| C | 8.729786  | -0.526560 | 0.190609  |
| H | 8.523217  | -1.396065 | -1.773813 |
| H | 8.603349  | 0.375148  | 2.144963  |
| H | 9.810374  | -0.633169 | 0.216583  |
| C | 3.960514  | 0.670977  | -1.137770 |
| F | 4.714591  | 1.770982  | -1.323641 |
| F | 2.678133  | 1.098193  | -1.013010 |
| F | 4.016194  | -0.057179 | -2.280351 |
| O | 3.998486  | 0.602883  | 1.239561  |
| C | -3.855962 | -2.744189 | -0.002390 |
| H | -3.613121 | -3.595700 | 0.645059  |



|   |           |           |           |
|---|-----------|-----------|-----------|
| H | -4.248120 | -3.117146 | -0.951979 |
| H | -4.622843 | -2.144287 | 0.493269  |
| O | -2.694346 | -1.988691 | -0.332674 |
| H | 3.038529  | 0.493491  | 1.326614  |

Vibrational frequencies

|           |          |          |
|-----------|----------|----------|
| -221.5976 | 13.5117  | 19.6135  |
| 29.7220   | 33.0053  | 40.0555  |
| 44.0998   | 46.5568  | 60.7329  |
| 65.1188   | 71.2877  | 75.9516  |
| 80.5879   | 93.5546  | 108.6162 |
| 110.2217  | 119.4862 | 128.3022 |
| 143.9032  | 155.8915 | 157.9787 |
| 166.0462  | 174.7654 | 183.3407 |
| 198.9873  | 207.3318 | 215.9996 |
| 229.0952  | 233.9593 | 243.4327 |

**3a**

|                                              |          |              |
|----------------------------------------------|----------|--------------|
| Zero-point correction=                       | 0.291053 |              |
| Thermal correction to Energy=                | 0.311445 |              |
| Thermal correction to Enthalpy=              | 0.312389 |              |
| Thermal correction to Gibbs Free Energy=     |          | 0.240041     |
| Sum of electronic and zero-point Energies=   |          | -1181.848099 |
| Sum of electronic and thermal Energies=      |          | -1181.827708 |
| Sum of electronic and thermal Enthalpies=    |          | -1181.826763 |
| Sum of electronic and thermal Free Energies= |          | -1181.899111 |

Cartesian coordinates

|   |           |           |           |
|---|-----------|-----------|-----------|
| C | -4.913172 | 0.093496  | -0.254632 |
| O | -5.525362 | 1.084288  | -0.614927 |
| C | -3.442382 | -0.086011 | -0.399640 |
| C | -2.776333 | -1.238634 | 0.042982  |
| C | -2.708492 | 0.940617  | -1.009086 |
| C | -1.400212 | -1.356881 | -0.126416 |
| H | -3.336814 | -2.037602 | 0.514603  |
| C | -1.333096 | 0.815674  | -1.173843 |
| H | -3.229742 | 1.828749  | -1.349794 |
| C | -0.660506 | -0.334004 | -0.736435 |
| H | -0.887275 | -2.247451 | 0.221226  |
| H | -0.770913 | 1.620061  | -1.639214 |
| C | 0.833546  | -0.471039 | -0.922495 |
| H | 1.175868  | 0.175016  | -1.734326 |
| H | 1.081599  | -1.499499 | -1.200873 |
| C | 1.706107  | -0.165273 | 0.322289  |

|   |           |           |           |
|---|-----------|-----------|-----------|
| C | 3.186292  | -0.365715 | -0.038246 |
| C | 3.898282  | 0.566925  | -0.806957 |
| C | 3.828006  | -1.545717 | 0.356950  |
| C | 5.228750  | 0.329329  | -1.151939 |
| H | 3.422805  | 1.482755  | -1.136899 |
| C | 5.159467  | -1.782324 | 0.008907  |
| H | 3.282286  | -2.286570 | 0.930344  |
| C | 5.866272  | -0.844354 | -0.743649 |
| H | 5.766826  | 1.065491  | -1.742123 |
| H | 5.640677  | -2.702626 | 0.327152  |
| H | 6.902444  | -1.026413 | -1.013371 |
| C | 1.450006  | 1.271279  | 0.841312  |
| F | 2.369070  | 1.613650  | 1.776596  |
| F | 0.242702  | 1.388911  | 1.422107  |
| F | 1.505528  | 2.200431  | -0.144487 |
| O | 1.287108  | -1.048933 | 1.349768  |
| H | 1.847031  | -0.895217 | 2.127918  |
| O | -5.510236 | -0.970268 | 0.321747  |
| C | -6.937392 | -0.869132 | 0.484430  |
| H | -7.246550 | -1.798996 | 0.962357  |
| H | -7.196109 | -0.015331 | 1.116437  |
| H | -7.430789 | -0.759405 | -0.485270 |

#### Vibrational frequencies

|          |          |          |
|----------|----------|----------|
| 19.6262  | 34.9008  | 37.0494  |
| 44.7304  | 64.0327  | 77.6312  |
| 90.1098  | 107.6915 | 147.2627 |
| 162.9795 | 179.6822 | 197.9369 |
| 204.8890 | 244.5789 | 279.7991 |
| 287.0115 | 301.6541 | 322.1329 |
| 334.9434 | 366.0438 | 369.4618 |
| 389.1903 | 411.2026 | 418.8549 |
| 432.5940 | 457.6734 | 490.6473 |
| 492.4002 | 522.6846 | 534.0534 |

#### **M1b**

|                                              |          |              |
|----------------------------------------------|----------|--------------|
| Zero-point correction=                       | 0.440503 |              |
| Thermal correction to Energy=                | 0.465822 |              |
| Thermal correction to Enthalpy=              | 0.466766 |              |
| Thermal correction to Gibbs Free Energy=     | 0.384693 |              |
| Sum of electronic and zero-point Energies=   |          | -1168.738176 |
| Sum of electronic and thermal Energies=      |          | -1168.712857 |
| Sum of electronic and thermal Enthalpies=    |          | -1168.711913 |
| Sum of electronic and thermal Free Energies= |          | -1168.793986 |

Cartesian coordinates

|   |           |           |           |
|---|-----------|-----------|-----------|
| C | 1.959618  | -0.541769 | 0.034066  |
| C | 3.877229  | 0.536257  | 0.246247  |
| C | 4.273096  | -1.798369 | 0.087176  |
| H | 4.239816  | -2.295920 | 1.059451  |
| H | 4.006781  | -2.513133 | -0.685880 |
| C | 0.565307  | 1.564522  | 0.067420  |
| C | 0.102452  | 1.970358  | -1.190050 |
| C | -0.108196 | 1.858457  | 1.262690  |
| C | -1.100151 | 2.684907  | -1.232433 |
| C | -1.304204 | 2.571629  | 1.166834  |
| C | -1.816490 | 2.988024  | -0.069597 |
| H | -1.486645 | 3.002913  | -2.196999 |
| H | -1.855904 | 2.797318  | 2.075721  |
| C | 5.597852  | -1.032971 | -0.156437 |
| H | 5.807418  | -1.010408 | -1.229313 |
| H | 6.436914  | -1.516237 | 0.345729  |
| C | 5.363630  | 0.419260  | 0.353335  |
| H | 5.886009  | 1.174337  | -0.236604 |
| H | 5.666778  | 0.537614  | 1.399272  |
| C | 0.850667  | 1.607553  | -2.445684 |
| H | 1.903198  | 1.903774  | -2.384093 |
| H | 0.824790  | 0.523849  | -2.609347 |
| H | 0.406532  | 2.092287  | -3.318026 |
| C | 0.413988  | 1.356824  | 2.583327  |
| H | 0.385973  | 0.260984  | 2.610988  |
| H | 1.453618  | 1.660367  | 2.745697  |
| H | -0.190229 | 1.733527  | 3.411624  |
| C | -3.123735 | 3.737880  | -0.131965 |
| H | -3.028228 | 4.734280  | 0.315900  |
| H | -3.466709 | 3.864290  | -1.162444 |
| H | -3.903591 | 3.208404  | 0.425872  |
| N | 2.979106  | 1.483719  | 0.271652  |
| N | 1.781021  | 0.799129  | 0.136001  |
| N | 3.299408  | -0.692572 | 0.094951  |
| C | -5.408706 | -0.761360 | 0.144967  |
| C | -5.113745 | -2.017941 | 0.680344  |
| C | -3.824567 | -2.542937 | 0.576893  |
| C | -2.799283 | -1.830100 | -0.069181 |
| C | -3.112141 | -0.564458 | -0.598466 |
| C | -4.400157 | -0.037462 | -0.495789 |
| H | -6.410398 | -0.349752 | 0.230426  |
| H | -5.885855 | -2.586422 | 1.191827  |

|   |           |           |           |
|---|-----------|-----------|-----------|
| H | -3.599684 | -3.508858 | 1.019575  |
| H | -2.342231 | 0.009892  | -1.103624 |
| H | -4.613589 | 0.940619  | -0.918787 |
| C | -1.413906 | -2.391918 | -0.184215 |
| C | -0.336590 | -1.436869 | -0.016992 |
| H | -0.623694 | -0.436187 | 0.263866  |
| C | 1.020696  | -1.705484 | -0.169230 |
| O | 1.605098  | -2.794729 | -0.452030 |
| C | -1.247699 | -3.716985 | -0.445840 |
| H | -0.254415 | -4.138943 | -0.528694 |
| H | -2.103978 | -4.364984 | -0.608637 |

Vibrational frequencies

|          |          |          |
|----------|----------|----------|
| 19.1187  | 34.6036  | 40.3489  |
| 52.8168  | 58.9714  | 64.7518  |
| 75.3705  | 94.1682  | 103.9367 |
| 118.9007 | 142.8778 | 150.6179 |
| 161.3769 | 168.7464 | 190.8300 |
| 197.2692 | 208.9276 | 226.4694 |
| 238.8253 | 241.1099 | 247.9879 |
| 274.7459 | 287.7233 | 293.7086 |
| 321.0614 | 338.1426 | 375.8592 |
| 399.0533 | 411.7728 | 414.2535 |

**M1b+2b**

|                                              |          |              |
|----------------------------------------------|----------|--------------|
| Zero-point correction=                       | 0.816274 |              |
| Thermal correction to Energy=                | 0.864891 |              |
| Thermal correction to Enthalpy=              | 0.865835 |              |
| Thermal correction to Gibbs Free Energy=     |          | 0.735669     |
| Sum of electronic and zero-point Energies=   |          | -3454.723526 |
| Sum of electronic and thermal Energies=      |          | -3454.674909 |
| Sum of electronic and thermal Enthalpies=    |          | -3454.673965 |
| Sum of electronic and thermal Free Energies= |          | -3454.804131 |

Cartesian coordinates

|   |           |           |           |
|---|-----------|-----------|-----------|
| C | 0.072979  | 2.242618  | 0.667071  |
| C | 0.092181  | 2.113792  | -0.781067 |
| C | 0.499507  | 0.917067  | -1.371646 |
| C | 0.902823  | -0.203248 | -0.537269 |
| C | 0.877455  | -0.082637 | 0.852695  |
| C | 0.456315  | 1.164455  | 1.467104  |
| C | -1.088014 | 3.037497  | 1.031649  |
| C | -1.784647 | 3.403043  | -0.190888 |
| C | -1.055667 | 2.832623  | -1.310664 |

|   |           |           |           |
|---|-----------|-----------|-----------|
| C | -1.749800 | 2.324544  | -2.409534 |
| C | -0.225047 | 0.388539  | -2.514654 |
| C | 0.425625  | -1.424320 | -1.164881 |
| C | -0.045442 | -2.475833 | -0.380145 |
| C | -0.065246 | -2.350837 | 1.067977  |
| C | 0.388728  | -1.177135 | 1.672712  |
| C | -0.340594 | -0.606661 | 2.793298  |
| C | -0.297886 | 0.841427  | 2.666785  |
| C | -1.411051 | 1.606653  | 3.016854  |
| C | -1.814298 | 2.726661  | 2.182589  |
| C | -3.179930 | 3.442892  | -0.213656 |
| C | -3.935531 | 3.119018  | 0.984372  |
| C | -3.266666 | 2.767807  | 2.157853  |
| C | -3.761054 | 1.673182  | 2.976424  |
| C | -2.614365 | 0.955395  | 3.507244  |
| C | -2.655827 | -0.434302 | 3.628364  |
| C | -1.496005 | -1.231494 | 3.264848  |
| C | -1.970060 | -2.452570 | 2.634523  |
| C | -1.269587 | -2.999744 | 1.558210  |
| C | -0.269548 | -1.059829 | -2.387907 |
| C | -4.084463 | -3.123943 | -0.830834 |
| C | -3.357706 | -2.812033 | -1.980759 |
| C | -3.761466 | -1.691759 | -2.814491 |
| C | -4.875854 | -0.927410 | -2.464954 |
| C | -5.631980 | -1.251560 | -1.266699 |
| C | -5.264148 | -2.199983 | 0.980924  |
| C | -4.117225 | -2.918605 | 1.511014  |
| C | -3.388515 | -3.489676 | 0.391025  |
| C | -1.993214 | -3.529073 | 0.413608  |
| C | -1.237291 | -3.205514 | -0.783819 |
| C | -1.905611 | -2.854461 | -1.957293 |
| C | -2.558841 | -1.041366 | -3.306026 |
| C | -2.517279 | 0.347901  | -3.428192 |
| C | -3.676259 | 1.143758  | -3.062643 |
| C | -4.832331 | 0.519388  | -2.591273 |
| C | -5.561189 | 1.090211  | -1.470928 |
| C | -6.055244 | -0.004384 | -0.652349 |
| C | -6.074432 | 0.117452  | 0.737561  |
| C | -5.670955 | -1.002731 | 1.570832  |
| C | -3.422616 | -2.410353 | 2.609426  |
| C | -3.846400 | -1.163347 | 3.223870  |
| C | -4.947672 | -0.473731 | 2.714995  |
| C | -4.904341 | 0.973353  | 2.588972  |
| C | -5.600757 | 1.338823  | 1.366676  |

|   |           |           |           |
|---|-----------|-----------|-----------|
| C | -5.126658 | 2.389737  | 0.580717  |
| C | -5.106421 | 2.262976  | -0.866804 |
| C | -3.902935 | 2.913813  | -1.357607 |
| C | -3.202051 | 2.365314  | -2.432727 |
| C | -1.410858 | -1.760029 | -2.776770 |
| C | -1.325396 | 1.077296  | -3.024017 |
| C | -5.244229 | -2.326957 | -0.466561 |
| C | 4.288249  | 1.993227  | -0.677829 |
| C | 4.488228  | 3.953364  | 0.321181  |
| C | 3.144055  | 4.169294  | -1.623144 |
| H | 2.088481  | 3.962368  | -1.434799 |
| H | 3.364646  | 3.950085  | -2.663757 |
| C | 5.690848  | 0.769710  | 1.025688  |
| C | 6.855374  | 0.264901  | 0.428735  |
| C | 5.101917  | 0.187667  | 2.159272  |
| C | 7.403097  | -0.900171 | 0.972318  |
| C | 5.689788  | -0.975703 | 2.663106  |
| C | 6.824595  | -1.544301 | 2.072198  |
| H | 8.295191  | -1.320761 | 0.515912  |
| H | 5.241749  | -1.454970 | 3.529581  |
| C | 3.584588  | 5.573927  | -1.141620 |
| H | 4.404171  | 5.930132  | -1.771489 |
| H | 2.766450  | 6.292500  | -1.206436 |
| C | 4.095780  | 5.395258  | 0.317281  |
| H | 4.924637  | 6.058402  | 0.570329  |
| H | 3.296947  | 5.555218  | 1.049914  |
| C | 7.455061  | 0.916438  | -0.789024 |
| H | 7.520542  | 2.003168  | -0.673935 |
| H | 6.835077  | 0.714455  | -1.670300 |
| H | 8.457486  | 0.528250  | -0.984000 |
| C | 3.883133  | 0.790435  | 2.806422  |
| H | 3.122318  | 1.048334  | 2.066113  |
| H | 4.138918  | 1.714289  | 3.337178  |
| H | 3.438158  | 0.095871  | 3.522915  |
| C | 7.384787  | -2.846951 | 2.585127  |
| H | 8.453998  | -2.937633 | 2.372376  |
| H | 6.879970  | -3.692142 | 2.100142  |
| H | 7.234830  | -2.952635 | 3.663863  |
| N | 5.176823  | 3.143787  | 1.079238  |
| N | 5.051235  | 1.917987  | 0.442984  |
| N | 3.952036  | 3.298224  | -0.750924 |
| C | 4.117154  | -5.359595 | -0.353384 |
| C | 4.382556  | -5.187312 | -1.714502 |
| C | 4.223973  | -3.935165 | -2.310065 |

|   |          |           |           |
|---|----------|-----------|-----------|
| C | 3.792316 | -2.826035 | -1.562868 |
| C | 3.530186 | -3.016113 | -0.193690 |
| C | 3.688029 | -4.266862 | 0.404121  |
| H | 4.244981 | -6.333205 | 0.111209  |
| H | 4.725157 | -6.027350 | -2.312677 |
| H | 4.455389 | -3.805503 | -3.363205 |
| H | 3.181082 | -2.180184 | 0.403295  |
| H | 3.468703 | -4.386997 | 1.461639  |
| C | 3.613659 | -1.482067 | -2.197428 |
| C | 4.024524 | -0.353369 | -1.390757 |
| H | 4.520278 | -0.585454 | -0.461799 |
| C | 3.833160 | 0.988691  | -1.706577 |
| O | 3.273886 | 1.505829  | -2.719951 |
| C | 3.062799 | -1.393010 | -3.438933 |
| H | 2.724989 | -2.281672 | -3.963348 |
| H | 2.926893 | -0.428990 | -3.910765 |

Vibrational frequencies

|          |          |          |
|----------|----------|----------|
| 9.1805   | 13.3303  | 15.8491  |
| 19.5040  | 21.7683  | 25.5770  |
| 33.9124  | 46.4735  | 48.6809  |
| 56.4115  | 60.8666  | 73.5906  |
| 86.8237  | 89.4373  | 106.2040 |
| 122.2274 | 131.2376 | 144.8408 |
| 154.8340 | 160.6680 | 174.9598 |
| 192.3334 | 196.7366 | 230.3726 |
| 231.5845 | 244.2699 | 250.0267 |
| 266.4393 | 266.8005 | 267.1781 |

**TSb**

|                                              |              |
|----------------------------------------------|--------------|
| Zero-point correction=                       | 0.816269     |
| Thermal correction to Energy=                | 0.863837     |
| Thermal correction to Enthalpy=              | 0.864782     |
| Thermal correction to Gibbs Free Energy=     | 0.739866     |
| Sum of electronic and zero-point Energies=   | -3454.715642 |
| Sum of electronic and thermal Energies=      | -3454.668074 |
| Sum of electronic and thermal Enthalpies=    | -3454.667129 |
| Sum of electronic and thermal Free Energies= | -3454.792045 |

Cartesian coordinates

|   |           |           |           |
|---|-----------|-----------|-----------|
| C | -0.279994 | 1.980228  | -1.779643 |
| C | -0.774017 | 1.025608  | -2.771987 |
| C | -0.405139 | -0.311898 | -2.702879 |
| C | 0.595897  | -0.810865 | -1.717390 |

|   |           |           |           |
|---|-----------|-----------|-----------|
| C | 0.957132  | 0.127956  | -0.676526 |
| C | 0.525270  | 1.501820  | -0.739632 |
| C | -1.353684 | 2.904247  | -1.486465 |
| C | -2.502058 | 2.544045  | -2.308035 |
| C | -2.140138 | 1.384879  | -3.102148 |
| C | -3.090343 | 0.391645  | -3.363455 |
| C | -1.392618 | -1.336272 | -2.946151 |
| C | 0.016571  | -2.099818 | -1.232762 |
| C | 0.040700  | -2.467140 | 0.106670  |
| C | 0.539554  | -1.538097 | 1.122428  |
| C | 0.937486  | -0.260557 | 0.712874  |
| C | 0.572582  | 0.896521  | 1.521395  |
| C | 0.318632  | 1.996098  | 0.615936  |
| C | -0.700624 | 2.910724  | 0.888262  |
| C | -1.558898 | 3.379956  | -0.182607 |
| C | -3.797179 | 2.667710  | -1.800863 |
| C | -4.005933 | 3.152496  | -0.447347 |
| C | -2.905680 | 3.491632  | 0.344344  |
| C | -2.877472 | 3.106327  | 1.747344  |
| C | -1.511218 | 2.746257  | 2.084710  |
| C | -1.265045 | 1.685371  | 2.957622  |
| C | -0.196058 | 0.740921  | 2.675957  |
| C | -0.634393 | -0.579688 | 3.084095  |
| C | -0.282014 | -1.689733 | 2.300666  |
| C | -1.133744 | -2.439630 | -2.037337 |
| C | -3.709201 | -2.971207 | 1.727686  |
| C | -3.513470 | -3.433556 | 0.424668  |
| C | -4.380827 | -2.970450 | -0.647024 |
| C | -5.408967 | -2.066180 | -0.373471 |
| C | -5.610602 | -1.586104 | 0.982692  |
| C | -4.295019 | -1.092981 | 3.013753  |
| C | -2.930765 | -1.457005 | 3.354107  |
| C | -2.564778 | -2.611515 | 2.551431  |
| C | -1.272057 | -2.725511 | 2.035862  |
| C | -1.069332 | -3.203449 | 0.680916  |
| C | -2.168247 | -3.557342 | -0.108559 |
| C | -3.568197 | -2.806307 | -1.839887 |
| C | -3.815257 | -1.747434 | -2.712009 |
| C | -4.885181 | -0.806715 | -2.429534 |
| C | -5.666665 | -0.962039 | -1.283381 |
| C | -6.027935 | 0.199333  | -0.488555 |
| C | -5.997127 | -0.187434 | 0.911707  |
| C | -5.531113 | 0.712378  | 1.872807  |
| C | -4.669272 | 0.250659  | 2.947496  |



|   |           |           |           |
|---|-----------|-----------|-----------|
| C | -1.983263 | -0.459334 | 3.602199  |
| C | -2.372890 | 0.941748  | 3.531971  |
| C | -3.684837 | 1.288100  | 3.208868  |
| C | -3.942008 | 2.392356  | 2.298593  |
| C | -5.083470 | 2.035861  | 1.473102  |
| C | -5.111522 | 2.407044  | 0.127938  |
| C | -5.595619 | 1.470079  | -0.873874 |
| C | -4.783369 | 1.631326  | -2.065987 |
| C | -4.436306 | 0.516803  | -2.832426 |
| C | -2.199650 | -3.170174 | -1.501633 |
| C | -2.706461 | -1.001442 | -3.288633 |
| C | -4.778353 | -2.031235 | 2.012257  |
| C | 4.241365  | 1.977126  | -0.749187 |
| C | 4.481771  | 3.941700  | 0.218219  |
| C | 3.036537  | 4.139228  | -1.656816 |
| H | 1.996928  | 3.900990  | -1.428114 |
| H | 3.222294  | 3.938771  | -2.708352 |
| C | 5.697611  | 0.761182  | 0.916718  |
| C | 6.831458  | 0.228330  | 0.283581  |
| C | 5.154862  | 0.225911  | 2.094462  |
| C | 7.402269  | -0.913667 | 0.848511  |
| C | 5.764141  | -0.921010 | 2.614655  |
| C | 6.876402  | -1.508841 | 2.002638  |
| H | 8.274555  | -1.353020 | 0.371887  |
| H | 5.354507  | -1.364648 | 3.517961  |
| C | 3.464363  | 5.550300  | -1.182898 |
| H | 4.236736  | 5.937556  | -1.852369 |
| H | 2.622879  | 6.243861  | -1.194354 |
| C | 4.058186  | 5.373711  | 0.244150  |
| H | 4.880694  | 6.057205  | 0.459539  |
| H | 3.296165  | 5.502408  | 1.021038  |
| C | 7.377195  | 0.832461  | -0.983624 |
| H | 7.476109  | 1.919724  | -0.902142 |
| H | 6.709749  | 0.624842  | -1.828249 |
| H | 8.357864  | 0.413799  | -1.220597 |
| C | 3.974789  | 0.860076  | 2.782379  |
| H | 3.190023  | 1.137432  | 2.074898  |
| H | 4.275503  | 1.775743  | 3.303542  |
| H | 3.539923  | 0.177515  | 3.516129  |
| C | 7.483038  | -2.776655 | 2.548284  |
| H | 8.576931  | -2.732115 | 2.538246  |
| H | 7.189854  | -3.636726 | 1.933770  |
| H | 7.154538  | -2.972396 | 3.572638  |
| N | 5.206045  | 3.134768  | 0.948646  |

|   |          |           |           |
|---|----------|-----------|-----------|
| N | 5.049135 | 1.906909  | 0.334426  |
| N | 3.899750 | 3.278029  | -0.823447 |
| C | 4.043409 | -5.469108 | -0.499320 |
| C | 3.764434 | -5.270777 | -1.853351 |
| C | 3.512216 | -3.987539 | -2.338654 |
| C | 3.536072 | -2.870506 | -1.483578 |
| C | 3.819708 | -3.088364 | -0.121159 |
| C | 4.067924 | -4.370581 | 0.364623  |
| H | 4.237292 | -6.468534 | -0.120944 |
| H | 3.748623 | -6.115365 | -2.536309 |
| H | 3.318339 | -3.846433 | -3.397470 |
| H | 3.813312 | -2.253412 | 0.570848  |
| H | 4.269988 | -4.511862 | 1.422646  |
| C | 3.262919 | -1.506154 | -2.012869 |
| C | 3.888501 | -0.417507 | -1.389049 |
| H | 4.557344 | -0.630716 | -0.570321 |
| C | 3.701477 | 0.950365  | -1.723851 |
| O | 3.125208 | 1.446921  | -2.715414 |
| C | 2.225881 | -1.329007 | -2.951571 |
| H | 1.786532 | -2.200773 | -3.424811 |
| H | 2.213084 | -0.415297 | -3.527886 |

Vibrational frequencies

|           |          |          |
|-----------|----------|----------|
| -345.0682 | 12.6623  | 17.6578  |
| 22.3819   | 27.4267  | 37.2803  |
| 45.9207   | 50.7122  | 52.7562  |
| 56.4882   | 62.0463  | 69.9303  |
| 86.3048   | 99.7542  | 117.3271 |
| 129.9483  | 134.1647 | 141.1077 |
| 144.3778  | 155.1370 | 164.6716 |
| 199.2671  | 208.9521 | 228.4954 |
| 236.2389  | 245.7638 | 253.0549 |
| 258.7801  | 263.2385 | 264.6276 |

**TSb'**

|                                              |          |              |
|----------------------------------------------|----------|--------------|
| Zero-point correction=                       | 0.816584 |              |
| Thermal correction to Energy=                | 0.863917 |              |
| Thermal correction to Enthalpy=              | 0.864861 |              |
| Thermal correction to Gibbs Free Energy=     |          | 0.740990     |
| Sum of electronic and zero-point Energies=   |          | -3454.707732 |
| Sum of electronic and thermal Energies=      |          | -3454.660399 |
| Sum of electronic and thermal Enthalpies=    |          | -3454.659455 |
| Sum of electronic and thermal Free Energies= |          | -3454.783325 |

Cartesian coordinates

|   |           |           |           |
|---|-----------|-----------|-----------|
| C | -0.147939 | 2.474955  | -0.669000 |
| C | -0.137151 | 1.656736  | -1.879872 |
| C | 0.437452  | 0.391000  | -1.883273 |
| C | 1.171290  | -0.150794 | -0.695115 |
| C | 0.973736  | 0.613227  | 0.532396  |
| C | 0.364484  | 1.907702  | 0.513321  |
| C | -1.413188 | 3.174590  | -0.628601 |
| C | -2.166590 | 2.834588  | -1.829146 |
| C | -1.375211 | 1.898152  | -2.600018 |
| C | -1.999692 | 0.857829  | -3.294819 |
| C | -0.232339 | -0.685963 | -2.572106 |
| C | 0.689955  | -1.573695 | -0.606375 |
| C | 0.356465  | -2.169468 | 0.603225  |
| C | 0.347685  | -1.398499 | 1.847336  |
| C | 0.605170  | -0.024483 | 1.764741  |
| C | -0.184917 | 0.909476  | 2.560290  |
| C | -0.338704 | 2.115907  | 1.778244  |
| C | -1.541534 | 2.820253  | 1.805117  |
| C | -2.095479 | 3.372841  | 0.580859  |
| C | -3.556127 | 2.698337  | -1.772939 |
| C | -4.259075 | 2.895930  | -0.519097 |
| C | -3.534919 | 3.214647  | 0.634618  |
| C | -3.874326 | 2.581164  | 1.900567  |
| C | -2.639977 | 2.340236  | 2.627349  |
| C | -2.490441 | 1.175035  | 3.381448  |
| C | -1.235220 | 0.443555  | 3.351627  |
| C | -1.534081 | -0.975504 | 3.404919  |
| C | -0.761347 | -1.866952 | 2.644816  |
| C | -0.072570 | -1.899760 | -1.786743 |
| C | -3.551137 | -3.436929 | 0.786126  |
| C | -2.881810 | -3.623616 | -0.424673 |
| C | -3.441612 | -3.080827 | -1.652308 |
| C | -4.651367 | -2.383780 | -1.621912 |
| C | -5.346148 | -2.193499 | -0.360418 |
| C | -4.835670 | -1.923788 | 2.040163  |
| C | -3.602549 | -2.171448 | 2.768570  |
| C | -2.804692 | -3.099718 | 1.988708  |
| C | -1.416859 | -2.951821 | 1.925249  |
| C | -0.722227 | -3.139366 | 0.667658  |
| C | -1.438335 | -3.473620 | -0.486152 |
| C | -2.343190 | -2.600578 | -2.470987 |
| C | -2.494015 | -1.437546 | -3.222442 |
| C | -3.749627 | -0.709450 | -3.192604 |

|   |           |           |           |
|---|-----------|-----------|-----------|
| C | -4.808628 | -1.171625 | -2.407972 |
| C | -5.601055 | -0.232705 | -1.632284 |
| C | -5.937451 | -0.867000 | -0.368919 |
| C | -5.959771 | -0.108472 | 0.803987  |
| C | -5.405593 | -0.649510 | 2.033087  |
| C | -2.974642 | -1.124870 | 3.450902  |
| C | -3.569201 | 0.204038  | 3.444646  |
| C | -4.754541 | 0.436808  | 2.747478  |
| C | -4.911629 | 1.650229  | 1.961771  |
| C | -5.657663 | 1.312432  | 0.760478  |
| C | -5.335417 | 1.921605  | -0.453243 |
| C | -5.308026 | 1.132088  | -1.675216 |
| C | -4.205908 | 1.611508  | -2.489519 |
| C | -3.443393 | 0.711359  | -3.236062 |
| C | -1.103689 | -2.843886 | -1.743540 |
| C | -1.412185 | -0.463617 | -3.288100 |
| C | -4.809913 | -2.714761 | 0.819811  |
| C | 3.805630  | 2.126488  | -0.596332 |
| C | 4.143317  | 4.076289  | 0.360294  |
| C | 2.796333  | 4.345662  | -1.576909 |
| H | 1.733952  | 4.187895  | -1.368373 |
| H | 3.000070  | 4.109103  | -2.618275 |
| C | 5.152838  | 0.824473  | 1.092991  |
| C | 6.184374  | 0.171941  | 0.395887  |
| C | 4.665568  | 0.378833  | 2.331999  |
| C | 6.693772  | -0.998909 | 0.960224  |
| C | 5.215972  | -0.798288 | 2.849092  |
| C | 6.219051  | -1.503663 | 2.176846  |
| H | 7.472614  | -1.537470 | 0.427424  |
| H | 4.842645  | -1.173928 | 3.797858  |
| C | 3.313193  | 5.730140  | -1.112508 |
| H | 4.137889  | 6.042581  | -1.757884 |
| H | 2.527757  | 6.484564  | -1.168059 |
| C | 3.838293  | 5.538327  | 0.341014  |
| H | 4.710759  | 6.152224  | 0.570179  |
| H | 3.065306  | 5.754177  | 1.086379  |
| C | 6.706969  | 0.675120  | -0.925407 |
| H | 6.814659  | 1.764077  | -0.932568 |
| H | 6.036353  | 0.401837  | -1.748267 |
| H | 7.683430  | 0.234707  | -1.139958 |
| C | 3.603388  | 1.131883  | 3.090026  |
| H | 2.822386  | 1.510795  | 2.427356  |
| H | 4.036929  | 1.994344  | 3.608411  |
| H | 3.135144  | 0.487228  | 3.836942  |

|   |          |           |           |
|---|----------|-----------|-----------|
| C | 6.791011 | -2.776819 | 2.747123  |
| H | 7.773822 | -2.595216 | 3.199307  |
| H | 6.925869 | -3.530046 | 1.965168  |
| H | 6.141902 | -3.196446 | 3.520693  |
| N | 4.774136 | 3.223904  | 1.129201  |
| N | 4.557081 | 2.005711  | 0.521032  |
| N | 3.565282 | 3.444849  | -0.701891 |
| C | 5.408954 | -4.817764 | -0.515504 |
| C | 5.656426 | -4.384339 | -1.820666 |
| C | 4.990822 | -3.269777 | -2.330068 |
| C | 4.057553 | -2.561672 | -1.550741 |
| C | 3.832530 | -3.000827 | -0.234065 |
| C | 4.493203 | -4.119283 | 0.274157  |
| H | 5.928990 | -5.683774 | -0.116352 |
| H | 6.378566 | -4.907675 | -2.441096 |
| H | 5.213941 | -2.926194 | -3.335463 |
| H | 3.127331 | -2.477677 | 0.400767  |
| H | 4.294573 | -4.438885 | 1.292991  |
| C | 3.365626 | -1.361787 | -2.113144 |
| C | 3.142431 | -0.237244 | -1.172656 |
| H | 3.516442 | -0.427033 | -0.175852 |
| C | 3.356358 | 1.117607  | -1.617594 |
| O | 3.118710 | 1.579629  | -2.743898 |
| C | 2.987587 | -1.322886 | -3.407932 |
| H | 3.140835 | -2.176234 | -4.060966 |
| H | 2.520697 | -0.444328 | -3.830651 |

Vibrational frequencies

|           |          |          |
|-----------|----------|----------|
| -384.7368 | 10.9202  | 13.0857  |
| 22.3997   | 28.2684  | 40.3012  |
| 46.0989   | 58.6047  | 61.1901  |
| 73.8316   | 75.3278  | 88.6727  |
| 98.4765   | 105.7875 | 117.4989 |
| 122.5497  | 132.7262 | 140.9569 |
| 160.6411  | 178.6140 | 181.9372 |
| 206.7326  | 209.5572 | 221.8776 |
| 232.9801  | 235.5010 | 246.7997 |
| 261.8406  | 263.3242 | 268.3647 |

**M2b**

|                                          |          |          |
|------------------------------------------|----------|----------|
| Zero-point correction=                   | 0.819032 |          |
| Thermal correction to Energy=            | 0.866419 |          |
| Thermal correction to Enthalpy=          | 0.867363 |          |
| Thermal correction to Gibbs Free Energy= |          | 0.743365 |

|                                              |              |
|----------------------------------------------|--------------|
| Sum of electronic and zero-point Energies=   | -3454.727416 |
| Sum of electronic and thermal Energies=      | -3454.680030 |
| Sum of electronic and thermal Enthalpies=    | -3454.679085 |
| Sum of electronic and thermal Free Energies= | -3454.803083 |

Cartesian coordinates

|   |           |           |           |
|---|-----------|-----------|-----------|
| C | -0.621661 | 1.843541  | -2.290424 |
| C | -1.057888 | 0.656346  | -3.040706 |
| C | -0.520282 | -0.592207 | -2.782188 |
| C | 0.710000  | -0.818618 | -1.877714 |
| C | 0.915113  | 0.386190  | -0.971412 |
| C | 0.295420  | 1.645147  | -1.241877 |
| C | -1.782053 | 2.664650  | -2.071244 |
| C | -2.927896 | 2.029970  | -2.716659 |
| C | -2.475452 | 0.793257  | -3.315727 |
| C | -3.310077 | -0.331602 | -3.322254 |
| C | -1.386747 | -1.737283 | -2.740340 |
| C | 0.212339  | -2.023743 | -1.046782 |
| C | 0.349719  | -2.112017 | 0.327620  |
| C | 0.808853  | -0.965024 | 1.124708  |
| C | 0.997144  | 0.254429  | 0.446351  |
| C | 0.540843  | 1.496350  | 1.075756  |
| C | 0.101312  | 2.368810  | 0.017169  |
| C | -1.005414 | 3.199282  | 0.200560  |
| C | -1.975194 | 3.364504  | -0.863751 |
| C | -4.197064 | 2.105154  | -2.138170 |
| C | -4.389541 | 2.814975  | -0.886699 |
| C | -3.289501 | 3.413414  | -0.260510 |
| C | -3.133303 | 3.304437  | 1.183512  |
| C | -1.715448 | 3.172841  | 1.470152  |
| C | -1.286100 | 2.329524  | 2.496770  |
| C | -0.127725 | 1.472435  | 2.299826  |
| C | -0.367943 | 0.211732  | 2.973113  |
| C | 0.075672  | -0.978460 | 2.361190  |
| C | -0.938431 | -2.615084 | -1.670585 |
| C | -3.197620 | -2.721844 | 2.314096  |
| C | -3.025960 | -3.401911 | 1.105656  |
| C | -4.008030 | -3.246452 | 0.043301  |
| C | -5.121217 | -2.425853 | 0.235585  |
| C | -5.300748 | -1.726046 | 1.495482  |
| C | -3.933399 | -0.715959 | 3.289113  |
| C | -2.518346 | -0.855711 | 3.580915  |
| C | -2.059705 | -2.087436 | 2.964636  |
| C | -0.797945 | -2.149152 | 2.368678  |

|   |           |           |           |
|---|-----------|-----------|-----------|
| C | -0.621030 | -2.847322 | 1.114044  |
| C | -1.711943 | -3.469418 | 0.493613  |
| C | -3.295557 | -3.218828 | -1.222059 |
| C | -3.724900 | -2.378378 | -2.246703 |
| C | -4.884247 | -1.526475 | -2.049728 |
| C | -5.568085 | -1.547701 | -0.832414 |
| C | -6.023096 | -0.306131 | -0.231918 |
| C | -5.863644 | -0.418693 | 1.207096  |
| C | -5.453055 | 0.693158  | 1.948995  |
| C | -4.477712 | 0.540311  | 3.014331  |
| C | -1.687114 | 0.271493  | 3.563065  |
| C | -2.255683 | 1.582767  | 3.279319  |
| C | -3.617646 | 1.713269  | 3.007898  |
| C | -4.065251 | 2.591621  | 1.938068  |
| C | -5.201634 | 1.960663  | 1.285757  |
| C | -5.353187 | 2.068087  | -0.098456 |
| C | -5.776611 | 0.910794  | -0.873376 |
| C | -5.061999 | 0.933782  | -2.134666 |
| C | -4.626593 | -0.259487 | -2.716545 |
| C | -1.873417 | -3.356249 | -0.934663 |
| C | -2.752780 | -1.630237 | -3.034032 |
| C | -4.356616 | -1.874395 | 2.515345  |
| C | 4.237887  | 1.975448  | -0.765883 |
| C | 4.382010  | 3.911103  | 0.262077  |
| C | 3.085675  | 4.148420  | -1.715018 |
| H | 2.033383  | 3.899144  | -1.566218 |
| H | 3.353629  | 3.976154  | -2.753956 |
| C | 5.592010  | 0.721982  | 0.959462  |
| C | 6.756893  | 0.207502  | 0.366455  |
| C | 5.003384  | 0.165487  | 2.105426  |
| C | 7.300689  | -0.949272 | 0.929097  |
| C | 5.589976  | -0.993800 | 2.623600  |
| C | 6.724023  | -1.571933 | 2.043606  |
| H | 8.193970  | -1.377016 | 0.481997  |
| H | 5.143924  | -1.454712 | 3.500420  |
| C | 3.469829  | 5.548542  | -1.175695 |
| H | 4.291596  | 5.951377  | -1.773046 |
| H | 2.628749  | 6.239573  | -1.237259 |
| C | 3.949735  | 5.339551  | 0.289482  |
| H | 4.750356  | 6.018775  | 0.585547  |
| H | 3.128666  | 5.445621  | 1.007076  |
| C | 7.368777  | 0.839174  | -0.857285 |
| H | 7.429296  | 1.927861  | -0.762793 |
| H | 6.774781  | 0.617708  | -1.752129 |

|   |          |           |           |
|---|----------|-----------|-----------|
| H | 8.376439 | 0.452765  | -1.025604 |
| C | 3.806785 | 0.792656  | 2.769753  |
| H | 3.043037 | 1.084944  | 2.046177  |
| H | 4.099223 | 1.697953  | 3.313068  |
| H | 3.353262 | 0.100671  | 3.482306  |
| C | 7.301969 | -2.855687 | 2.582736  |
| H | 8.395842 | -2.821206 | 2.608329  |
| H | 7.021063 | -3.700224 | 1.941373  |
| H | 6.938039 | -3.068666 | 3.591491  |
| N | 5.059450 | 3.087696  | 1.022729  |
| N | 4.960889 | 1.877890  | 0.371784  |
| N | 3.889863 | 3.272120  | -0.837766 |
| C | 3.948467 | -5.465419 | -0.605878 |
| C | 3.505997 | -5.237991 | -1.910541 |
| C | 3.242162 | -3.940212 | -2.347918 |
| C | 3.432902 | -2.839211 | -1.492891 |
| C | 3.879602 | -3.085229 | -0.178518 |
| C | 4.129486 | -4.382572 | 0.259978  |
| H | 4.142001 | -6.477716 | -0.263612 |
| H | 3.364395 | -6.072039 | -2.591476 |
| H | 2.912449 | -3.782064 | -3.369408 |
| H | 3.990607 | -2.259667 | 0.516112  |
| H | 4.452781 | -4.548029 | 1.283679  |
| C | 3.175692 | -1.457549 | -1.965680 |
| C | 3.942947 | -0.441554 | -1.478000 |
| H | 4.709562 | -0.681531 | -0.755069 |
| C | 3.800006 | 0.965684  | -1.808807 |
| O | 3.383027 | 1.456463  | -2.859717 |
| C | 1.963300 | -1.193057 | -2.798310 |
| H | 1.669846 | -2.070128 | -3.377320 |
| H | 2.122701 | -0.358879 | -3.477378 |

Vibrational frequencies

|          |          |          |
|----------|----------|----------|
| 15.1259  | 18.0274  | 22.2699  |
| 25.8870  | 31.3157  | 45.6411  |
| 51.7436  | 56.3241  | 64.2912  |
| 72.0321  | 80.7168  | 81.5100  |
| 89.4837  | 127.2829 | 130.2742 |
| 140.9541 | 160.2049 | 167.5864 |
| 173.2143 | 188.9602 | 206.9593 |
| 213.6663 | 230.0965 | 243.9271 |
| 254.5706 | 257.8716 | 260.0607 |
| 261.6658 | 262.0202 | 269.1016 |



**M1c**

|                                              |              |              |
|----------------------------------------------|--------------|--------------|
| Zero-point correction=                       | 0.540628     |              |
| Thermal correction to Energy=                | 0.584666     |              |
| Thermal correction to Enthalpy=              | 0.585610     |              |
| Thermal correction to Gibbs Free Energy=     | 0.460141     |              |
| Sum of electronic and zero-point Energies=   |              | -2739.802793 |
| Sum of electronic and thermal Energies=      | -2739.758755 |              |
| Sum of electronic and thermal Enthalpies=    |              | -2739.757811 |
| Sum of electronic and thermal Free Energies= |              | -2739.883280 |

## Cartesian coordinates

|    |           |           |           |
|----|-----------|-----------|-----------|
| C  | -0.024761 | -0.933967 | 2.055095  |
| N  | -1.422384 | -1.181609 | 2.332738  |
| C  | -1.739893 | -2.593073 | 2.515619  |
| C  | -0.367948 | -3.299374 | 2.541123  |
| C  | 0.663213  | -2.160674 | 2.685804  |
| H  | 0.271019  | -0.002728 | 2.547998  |
| H  | -2.300024 | -2.712635 | 3.452831  |
| H  | -2.382232 | -2.972874 | 1.707896  |
| H  | -0.302002 | -4.018909 | 3.361207  |
| H  | -0.201896 | -3.833452 | 1.605334  |
| H  | 0.851329  | -1.943781 | 3.741903  |
| H  | 1.617633  | -2.400671 | 2.214627  |
| C  | -2.354522 | -0.182470 | 2.457470  |
| C  | -3.700887 | -0.335905 | 2.487666  |
| H  | -1.926081 | 0.817494  | 2.488942  |
| H  | -4.123983 | -1.327764 | 2.366988  |
| C  | -4.594645 | 0.804904  | 2.534098  |
| C  | -5.918279 | 0.818141  | 2.275888  |
| H  | -4.120895 | 1.761016  | 2.762838  |
| C  | 0.356916  | -0.760086 | 0.510197  |
| O  | 0.277091  | -2.051922 | -0.076039 |
| Si | 0.232519  | -2.608370 | -1.683001 |
| C  | -1.500145 | -3.229941 | -2.072347 |
| H  | -1.472004 | -3.869063 | -2.963400 |
| H  | -1.899435 | -3.836970 | -1.251805 |
| H  | -2.212790 | -2.425224 | -2.274583 |
| C  | 1.417552  | -4.070588 | -1.721142 |
| H  | 2.471154  | -3.780423 | -1.641955 |
| H  | 1.203995  | -4.769155 | -0.904149 |
| H  | 1.304681  | -4.621396 | -2.662674 |
| C  | 0.759838  | -1.286328 | -2.911994 |
| H  | 0.794035  | -1.723465 | -3.917744 |
| H  | 0.060880  | -0.445806 | -2.943585 |

|   |           |           |           |
|---|-----------|-----------|-----------|
| H | 1.757571  | -0.890370 | -2.695890 |
| C | -0.645951 | 0.165920  | -0.205622 |
| C | -1.938820 | -0.340094 | -0.410838 |
| C | -2.919510 | 0.416720  | -1.039747 |
| C | -2.640225 | 1.703429  | -1.500078 |
| C | -1.353976 | 2.202274  | -1.322876 |
| C | -0.363778 | 1.444801  | -0.686700 |
| H | -2.179570 | -1.335110 | -0.069403 |
| H | -3.405623 | 2.299486  | -1.982333 |
| H | 0.623930  | 1.875006  | -0.590182 |
| C | 1.801793  | -0.241332 | 0.491859  |
| C | 2.151195  | 0.986690  | 1.072522  |
| C | 3.471469  | 1.437610  | 1.051884  |
| C | 4.482862  | 0.673297  | 0.471616  |
| C | 4.144636  | -0.565289 | -0.065598 |
| C | 2.827051  | -1.021005 | -0.042548 |
| H | 1.397191  | 1.614630  | 1.532856  |
| H | 5.504364  | 1.032317  | 0.446044  |
| H | 2.606404  | -2.003269 | -0.429985 |
| C | -4.272286 | -0.192383 | -1.288145 |
| C | -0.979709 | 3.544463  | -1.889548 |
| C | 3.804298  | 2.747753  | 1.714161  |
| C | 5.176748  | -1.407497 | -0.763991 |
| F | 4.954233  | -2.730215 | -0.574545 |
| F | 6.430176  | -1.139075 | -0.342846 |
| F | 5.151820  | -1.201215 | -2.103485 |
| F | 4.921862  | 3.305070  | 1.201098  |
| F | 2.800634  | 3.644480  | 1.577021  |
| F | 4.011771  | 2.594825  | 3.043782  |
| F | -0.095559 | 4.194698  | -1.097744 |
| F | -2.052149 | 4.349415  | -2.048488 |
| F | -0.392923 | 3.420565  | -3.105151 |
| F | -5.259878 | 0.727646  | -1.264767 |
| F | -4.317542 | -0.787603 | -2.511272 |
| F | -4.581551 | -1.148687 | -0.385973 |
| C | -6.767212 | -0.351902 | 1.869218  |
| H | -6.272213 | -1.313454 | 2.028561  |
| H | -7.714235 | -0.368720 | 2.422982  |
| H | -7.023736 | -0.292701 | 0.802515  |
| H | -6.430962 | 1.778102  | 2.318368  |

Vibrational frequencies

|         |         |         |
|---------|---------|---------|
| 15.9147 | 19.0805 | 22.3118 |
| 24.7073 | 31.6679 | 33.1664 |

|          |          |          |
|----------|----------|----------|
| 34.9764  | 37.3681  | 50.1030  |
| 58.4851  | 62.1171  | 70.9837  |
| 75.6921  | 80.3427  | 87.5626  |
| 97.7987  | 99.4631  | 102.2769 |
| 105.6761 | 114.0128 | 117.7374 |
| 128.5212 | 135.2149 | 150.9902 |
| 155.4189 | 162.7417 | 167.3794 |
| 177.0283 | 179.3643 | 189.4579 |

### M1c+2c

|                                              |              |              |
|----------------------------------------------|--------------|--------------|
| Zero-point correction=                       | 0.715002     |              |
| Thermal correction to Energy=                | 0.773162     |              |
| Thermal correction to Enthalpy=              | 0.774106     |              |
| Thermal correction to Gibbs Free Energy=     |              | 0.616206     |
| Sum of electronic and zero-point Energies=   |              | -3384.706730 |
| Sum of electronic and thermal Energies=      | -3384.648570 |              |
| Sum of electronic and thermal Enthalpies=    |              | -3384.647625 |
| Sum of electronic and thermal Free Energies= |              | -3384.805526 |

### Cartesian coordinates

|    |           |           |           |
|----|-----------|-----------|-----------|
| C  | -0.431597 | -1.231390 | 0.884355  |
| N  | 0.986504  | -0.917299 | 0.878864  |
| C  | 1.520183  | -0.655716 | 2.214478  |
| C  | 0.454803  | -1.232838 | 3.170163  |
| C  | -0.599084 | -1.906936 | 2.261032  |
| H  | -0.643153 | -1.908031 | 0.049648  |
| H  | 2.493643  | -1.148406 | 2.292774  |
| H  | 1.672514  | 0.420590  | 2.374821  |
| H  | 0.894227  | -1.950715 | 3.866713  |
| H  | -0.004695 | -0.431699 | 3.749134  |
| H  | -0.379464 | -2.972137 | 2.144022  |
| H  | -1.604621 | -1.802590 | 2.668984  |
| C  | 1.729258  | -0.790594 | -0.248811 |
| C  | 2.944298  | -0.173637 | -0.333180 |
| H  | 1.279284  | -1.213202 | -1.140936 |
| H  | 3.348726  | 0.312592  | 0.544241  |
| C  | 3.699547  | -0.136101 | -1.555177 |
| C  | 4.843137  | 0.553902  | -1.777445 |
| H  | 3.321148  | -0.748277 | -2.371456 |
| C  | -1.364876 | 0.053374  | 0.682940  |
| O  | -1.444060 | 0.693955  | 1.946637  |
| Si | -2.598279 | 1.623971  | 2.760648  |
| C  | -1.686075 | 2.077958  | 4.336646  |
| H  | -2.295686 | 2.737259  | 4.965729  |

|   |           |           |           |
|---|-----------|-----------|-----------|
| H | -1.446036 | 1.188394  | 4.929187  |
| H | -0.746738 | 2.599549  | 4.121863  |
| C | -4.137532 | 0.621331  | 3.160249  |
| H | -4.728826 | 0.383852  | 2.271189  |
| H | -3.891563 | -0.319514 | 3.664711  |
| H | -4.782283 | 1.195772  | 3.837360  |
| C | -3.058999 | 3.174692  | 1.793359  |
| H | -3.372805 | 3.961816  | 2.489932  |
| H | -2.208900 | 3.566132  | 1.223677  |
| H | -3.889954 | 3.009055  | 1.101612  |
| C | -0.640514 | 0.963499  | -0.313652 |
| C | 0.213380  | 1.958990  | 0.161373  |
| C | 1.116369  | 2.586975  | -0.695913 |
| C | 1.169585  | 2.257800  | -2.047254 |
| C | 0.286341  | 1.293751  | -2.529198 |
| C | -0.611115 | 0.651654  | -1.675980 |
| H | 0.226745  | 2.183568  | 1.220113  |
| H | 1.905337  | 2.709379  | -2.699712 |
| H | -1.250437 | -0.130152 | -2.072217 |
| C | -2.772880 | -0.324790 | 0.195489  |
| C | -3.359356 | -1.565804 | 0.464062  |
| C | -4.693874 | -1.810135 | 0.133406  |
| C | -5.478291 | -0.826037 | -0.462908 |
| C | -4.891065 | 0.403761  | -0.751263 |
| C | -3.554799 | 0.647069  | -0.440303 |
| H | -2.797142 | -2.359522 | 0.937590  |
| H | -6.516179 | -1.015147 | -0.706309 |
| H | -3.125561 | 1.610258  | -0.688420 |
| C | 2.115800  | 3.529756  | -0.086267 |
| C | 0.418136  | 0.788132  | -3.937188 |
| C | -5.293903 | -3.137559 | 0.512833  |
| C | -5.704000 | 1.529093  | -1.330000 |
| F | -5.986658 | 2.459089  | -0.380361 |
| F | -6.880287 | 1.108416  | -1.836697 |
| F | -5.037746 | 2.173313  | -2.313327 |
| F | -5.546135 | -3.197648 | 1.842237  |
| F | -6.458128 | -3.374901 | -0.126179 |
| F | -4.455020 | -4.161003 | 0.231041  |
| F | 1.013562  | 1.677422  | -4.755535 |
| F | -0.778818 | 0.466794  | -4.476813 |
| F | 1.171974  | -0.347782 | -3.969577 |
| F | 3.022640  | 3.978883  | -0.975912 |
| F | 1.520427  | 4.608567  | 0.472499  |
| F | 2.806245  | 2.915803  | 0.915911  |

|   |          |           |           |
|---|----------|-----------|-----------|
| N | 5.371180 | -2.093673 | 0.201717  |
| N | 4.247191 | -2.323293 | 0.730313  |
| C | 6.151358 | -1.151054 | 0.963039  |
| C | 3.431279 | -3.264349 | -0.006201 |
| O | 7.352897 | -1.087073 | 0.816333  |
| O | 2.545120 | -3.859003 | 0.571807  |
| O | 3.744444 | -3.385890 | -1.299218 |
| O | 5.428122 | -0.363037 | 1.771905  |
| C | 6.168690 | 0.614809  | 2.544065  |
| H | 6.790793 | 1.207142  | 1.867313  |
| H | 6.833165 | 0.082902  | 3.232925  |
| C | 5.152077 | 1.465171  | 3.276914  |
| H | 4.520394 | 0.847147  | 3.922115  |
| H | 5.669900 | 2.198992  | 3.902838  |
| H | 4.508817 | 2.006258  | 2.576928  |
| C | 2.952473 | -4.329561 | -2.068678 |
| H | 3.568010 | -4.532616 | -2.947508 |
| H | 2.838984 | -5.250012 | -1.489098 |
| C | 1.599601 | -3.757514 | -2.457945 |
| H | 1.071161 | -4.478713 | -3.090617 |
| H | 0.991726 | -3.575569 | -1.568470 |
| H | 1.706313 | -2.826037 | -3.021813 |
| C | 5.514077 | 1.532193  | -0.860595 |
| H | 5.621558 | 2.505491  | -1.357294 |
| H | 4.960773 | 1.697083  | 0.064433  |
| H | 6.529525 | 1.200502  | -0.605964 |
| H | 5.317824 | 0.429297  | -2.749307 |

#### Vibrational frequencies

|          |          |          |
|----------|----------|----------|
| 12.1472  | 15.7309  | 20.3680  |
| 21.9783  | 23.7778  | 26.5052  |
| 28.6623  | 33.5478  | 34.5498  |
| 37.4899  | 40.2395  | 44.3675  |
| 44.7595  | 48.0804  | 53.3849  |
| 61.8001  | 71.3838  | 74.3430  |
| 78.6389  | 82.1032  | 86.0492  |
| 95.7062  | 98.5355  | 102.6914 |
| 103.2985 | 107.1651 | 108.9206 |
| 117.5911 | 133.2068 | 136.2997 |

#### TSc

|                                 |          |
|---------------------------------|----------|
| Zero-point correction=          | 0.716064 |
| Thermal correction to Energy=   | 0.772724 |
| Thermal correction to Enthalpy= | 0.773669 |

|                                              |              |
|----------------------------------------------|--------------|
| Thermal correction to Gibbs Free Energy=     | 0.618768     |
| Sum of electronic and zero-point Energies=   | -3384.680999 |
| Sum of electronic and thermal Energies=      | -3384.624338 |
| Sum of electronic and thermal Enthalpies=    | -3384.623394 |
| Sum of electronic and thermal Free Energies= | -3384.778295 |

Cartesian coordinates

|    |           |           |           |
|----|-----------|-----------|-----------|
| C  | 0.384041  | -1.392945 | -0.363813 |
| N  | -0.943859 | -0.853669 | -0.700009 |
| C  | -1.363408 | -1.271236 | -2.049201 |
| C  | -0.755950 | -2.672061 | -2.157308 |
| C  | 0.511626  | -2.646042 | -1.270104 |
| H  | 0.396636  | -1.632983 | 0.702690  |
| H  | -2.451242 | -1.293035 | -2.103098 |
| H  | -0.946667 | -0.576253 | -2.783611 |
| H  | -1.484213 | -3.384178 | -1.765339 |
| H  | -0.530267 | -2.936925 | -3.192662 |
| H  | 0.581391  | -3.551936 | -0.662949 |
| H  | 1.416062  | -2.577352 | -1.874605 |
| C  | -1.667088 | -0.133231 | 0.140100  |
| C  | -2.865085 | 0.516319  | -0.162581 |
| H  | -1.275735 | -0.068729 | 1.151518  |
| H  | -3.185779 | 0.574227  | -1.193410 |
| C  | -3.679480 | 1.015463  | 0.842002  |
| C  | -5.008138 | 1.405711  | 0.581339  |
| H  | -3.364504 | 0.898989  | 1.877175  |
| C  | 1.503281  | -0.309520 | -0.636343 |
| O  | 1.478400  | -0.109839 | -2.035198 |
| Si | 2.423020  | 0.515982  | -3.293339 |
| C  | 1.292314  | 0.284900  | -4.771610 |
| H  | 1.767709  | 0.656488  | -5.686938 |
| H  | 1.050893  | -0.771704 | -4.930804 |
| H  | 0.350665  | 0.830697  | -4.645871 |
| C  | 4.014772  | -0.459161 | -3.521470 |
| H  | 4.826492  | -0.125006 | -2.869951 |
| H  | 3.859777  | -1.529571 | -3.347196 |
| H  | 4.360043  | -0.344927 | -4.556558 |
| C  | 2.786190  | 2.347347  | -3.052343 |
| H  | 3.300850  | 2.723848  | -3.945671 |
| H  | 1.872891  | 2.938558  | -2.929748 |
| H  | 3.438765  | 2.562186  | -2.199851 |
| C  | 1.113378  | 0.986928  | 0.092108  |
| C  | 0.383275  | 1.965637  | -0.580987 |
| C  | -0.075930 | 3.099210  | 0.088886  |

|   |           |           |           |
|---|-----------|-----------|-----------|
| C | 0.175422  | 3.275785  | 1.445626  |
| C | 0.901311  | 2.293973  | 2.122756  |
| C | 1.366986  | 1.159520  | 1.457364  |
| H | 0.150392  | 1.830954  | -1.628177 |
| H | -0.190138 | 4.151527  | 1.967555  |
| H | 1.921072  | 0.410317  | 2.011830  |
| C | 2.889254  | -0.777790 | -0.154373 |
| C | 3.159562  | -2.054291 | 0.341783  |
| C | 4.456691  | -2.409080 | 0.727031  |
| C | 5.510627  | -1.509122 | 0.614291  |
| C | 5.239613  | -0.227620 | 0.135366  |
| C | 3.947689  | 0.136701  | -0.227939 |
| H | 2.378726  | -2.793680 | 0.452902  |
| H | 6.514813  | -1.789998 | 0.907192  |
| H | 3.764558  | 1.150973  | -0.559863 |
| C | -0.917889 | 4.078850  | -0.682943 |
| C | 1.236479  | 2.485473  | 3.578665  |
| C | 4.704237  | -3.814280 | 1.209379  |
| C | 6.360185  | 0.751935  | -0.083609 |
| F | 6.815670  | 0.684351  | -1.361260 |
| F | 7.412469  | 0.513516  | 0.724759  |
| F | 5.962952  | 2.027255  | 0.119375  |
| F | 4.794269  | -4.681325 | 0.173829  |
| F | 5.848378  | -3.915917 | 1.916005  |
| F | 3.694814  | -4.251786 | 1.997672  |
| F | 0.301715  | 3.221872  | 4.216380  |
| F | 2.419845  | 3.122214  | 3.736019  |
| F | 1.337489  | 1.302615  | 4.227225  |
| F | -1.096403 | 5.239436  | -0.022882 |
| F | -0.355513 | 4.368692  | -1.881873 |
| F | -2.145617 | 3.568681  | -0.947002 |
| N | -5.790594 | -0.449799 | 0.503683  |
| N | -5.213421 | -1.194490 | -0.439996 |
| C | -7.147975 | -0.168519 | 0.364200  |
| C | -4.319124 | -2.122464 | 0.062442  |
| O | -7.725964 | 0.800720  | 0.838551  |
| O | -3.669283 | -2.872350 | -0.666560 |
| O | -4.255359 | -2.213510 | 1.428316  |
| O | -7.800403 | -1.195464 | -0.233564 |
| C | -9.238897 | -1.084485 | -0.244388 |
| H | -9.529464 | -0.168516 | -0.770518 |
| H | -9.604020 | -1.000558 | 0.785228  |
| C | -9.772534 | -2.324401 | -0.933268 |
| H | -9.471359 | -3.228405 | -0.395290 |

|   |            |           |           |
|---|------------|-----------|-----------|
| H | -10.866536 | -2.290429 | -0.968119 |
| H | -9.395001  | -2.393074 | -1.958011 |
| C | -3.493515  | -3.312887 | 1.954481  |
| H | -3.887665  | -3.463942 | 2.963787  |
| H | -3.687879  | -4.211969 | 1.361822  |
| C | -2.001582  | -3.017682 | 1.993645  |
| H | -1.465051  | -3.843578 | 2.474092  |
| H | -1.626644  | -2.900458 | 0.975693  |
| H | -1.802376  | -2.104382 | 2.564464  |
| C | -5.390229  | 1.961994  | -0.771677 |
| H | -4.781672  | 2.841488  | -1.014534 |
| H | -5.239746  | 1.218693  | -1.562738 |
| H | -6.441216  | 2.253929  | -0.774141 |
| H | -5.582148  | 1.774186  | 1.423092  |

#### Vibrational frequencies

|           |          |          |
|-----------|----------|----------|
| -328.2717 | 11.8508  | 15.2488  |
| 17.0577   | 21.1249  | 25.1275  |
| 26.9316   | 28.1367  | 28.9294  |
| 30.6275   | 33.4917  | 36.8261  |
| 45.9276   | 48.8364  | 52.8800  |
| 56.8948   | 65.2336  | 74.7593  |
| 76.0280   | 81.9579  | 89.4842  |
| 95.1444   | 95.5298  | 99.3470  |
| 102.7169  | 107.5525 | 112.2458 |
| 121.4332  | 123.4024 | 127.9943 |

#### TSc'

|                                              |              |              |
|----------------------------------------------|--------------|--------------|
| Zero-point correction=                       | 0.715339     |              |
| Thermal correction to Energy=                | 0.772527     |              |
| Thermal correction to Enthalpy=              | 0.773471     |              |
| Thermal correction to Gibbs Free Energy=     |              | 0.616561     |
| Sum of electronic and zero-point Energies=   |              | -3384.677529 |
| Sum of electronic and thermal Energies=      | -3384.620341 |              |
| Sum of electronic and thermal Enthalpies=    |              | -3384.619397 |
| Sum of electronic and thermal Free Energies= |              | -3384.776307 |

#### Cartesian coordinates

|   |           |           |           |
|---|-----------|-----------|-----------|
| C | 0.291060  | -1.966404 | -2.115622 |
| C | 0.167006  | -1.094768 | -0.855235 |
| N | -1.226157 | -0.647254 | -0.921567 |
| C | -1.748179 | -0.620208 | -2.303115 |
| C | -0.661699 | -1.319313 | -3.141984 |
| C | 1.229975  | 0.089815  | -0.798893 |



|    |           |           |           |
|----|-----------|-----------|-----------|
| O  | 1.247410  | 0.678097  | -2.085654 |
| Si | 1.914591  | 2.112979  | -2.725472 |
| C  | 2.607372  | 1.593137  | -4.392633 |
| C  | -1.926320 | -0.358616 | 0.154434  |
| C  | -3.270100 | 0.113585  | 0.162463  |
| N  | -4.272176 | -1.472327 | -0.224248 |
| N  | -4.781078 | -2.059994 | 0.870167  |
| C  | -3.891998 | -2.850408 | 1.538674  |
| O  | -4.194319 | -3.567797 | 2.485246  |
| C  | 2.568087  | -0.595092 | -0.477736 |
| C  | 3.610260  | -0.577356 | -1.402341 |
| C  | 4.828792  | -1.195925 | -1.126926 |
| C  | 5.031263  | -1.878415 | 0.069139  |
| C  | 3.974378  | -1.944822 | 0.975560  |
| C  | 2.757546  | -1.316944 | 0.708272  |
| C  | 4.134392  | -2.645522 | 2.298493  |
| F  | 3.050702  | -3.403094 | 2.589044  |
| C  | 5.937172  | -1.033945 | -2.130954 |
| F  | 6.934083  | -1.921561 | -1.948439 |
| C  | 0.812718  | 1.153190  | 0.239282  |
| C  | -0.271119 | 1.977344  | -0.100578 |
| C  | -0.753084 | 2.940670  | 0.777224  |
| C  | -0.160769 | 3.125259  | 2.025674  |
| C  | 0.935957  | 2.335344  | 2.357101  |
| C  | 1.423675  | 1.361972  | 1.477404  |
| C  | -1.885001 | 3.825950  | 0.330573  |
| F  | -1.415483 | 4.951009  | -0.266367 |
| C  | 1.584427  | 2.474152  | 3.709931  |
| F  | 1.096519  | 1.562890  | 4.584349  |
| F  | -2.678992 | 3.210244  | -0.575511 |
| F  | -2.663160 | 4.219263  | 1.359105  |
| F  | 1.377776  | 3.693609  | 4.249129  |
| F  | 2.920389  | 2.275865  | 3.644713  |
| F  | 5.215895  | -3.449293 | 2.325903  |
| F  | 4.266362  | -1.753968 | 3.309280  |
| F  | 6.480359  | 0.206507  | -2.054857 |
| F  | 5.483501  | -1.176638 | -3.399154 |
| C  | -3.744057 | 0.635558  | 1.450066  |
| C  | -4.698796 | 1.565634  | 1.614196  |
| C  | 3.253465  | 2.822651  | -1.613037 |
| C  | 0.553567  | 3.380493  | -3.006405 |
| C  | -5.204908 | -1.068104 | -1.184794 |
| O  | -4.996158 | -0.210793 | -2.042232 |
| O  | -6.308667 | -1.836475 | -1.175979 |

|   |           |           |           |
|---|-----------|-----------|-----------|
| C | -7.244428 | -1.591032 | -2.250554 |
| C | -8.410576 | -2.535417 | -2.043019 |
| O | -2.569272 | -2.732871 | 1.116752  |
| C | -1.613581 | -3.515718 | 1.853698  |
| C | -1.548614 | -4.940225 | 1.328861  |
| H | 0.287166  | -1.677412 | 0.058426  |
| H | -2.710756 | -1.129916 | -2.314299 |
| H | -1.919712 | 0.417535  | -2.608391 |
| H | -1.099577 | -2.062868 | -3.811182 |
| H | -0.120700 | -0.590233 | -3.744450 |
| H | -0.046000 | -2.976337 | -1.864484 |
| H | 1.317899  | -2.030205 | -2.477227 |
| H | -1.409125 | -0.499422 | 1.096629  |
| H | -3.571210 | 0.648368  | -0.729364 |
| H | -3.286008 | 0.203782  | 2.338371  |
| H | 0.926250  | 4.158354  | -3.684592 |
| H | -0.325297 | 2.934398  | -3.486093 |
| H | 0.222400  | 3.881832  | -2.092755 |
| H | 3.428521  | 0.871682  | -4.317346 |
| H | 1.827948  | 1.142450  | -5.017456 |
| H | 2.992472  | 2.467696  | -4.930333 |
| H | 3.565911  | 3.796623  | -2.009645 |
| H | 2.897248  | 2.987720  | -0.591330 |
| H | 4.145172  | 2.189940  | -1.562764 |
| H | -0.744317 | 1.868799  | -1.064877 |
| H | -0.538675 | 3.869965  | 2.715766  |
| H | 2.296742  | 0.797713  | 1.776451  |
| H | 1.962367  | -1.402493 | 1.440630  |
| H | 5.977178  | -2.359853 | 0.283413  |
| H | 3.473081  | -0.097370 | -2.358600 |
| H | -7.555931 | -0.541536 | -2.223586 |
| H | -6.743521 | -1.762044 | -3.209832 |
| H | -0.654222 | -3.003310 | 1.716360  |
| H | -1.868002 | -3.502891 | 2.917226  |
| H | -9.152179 | -2.389402 | -2.835233 |
| H | -8.078142 | -3.577485 | -2.068056 |
| H | -8.892906 | -2.352675 | -1.078208 |
| H | -0.774272 | -5.506720 | 1.858082  |
| H | -2.509960 | -5.436114 | 1.482696  |
| H | -1.315356 | -4.949525 | 0.258971  |
| C | -5.478157 | 2.265759  | 0.542932  |
| H | -6.552564 | 2.185432  | 0.749495  |
| H | -5.237778 | 3.336481  | 0.533116  |
| H | -5.302899 | 1.860213  | -0.455578 |

|   |           |          |          |
|---|-----------|----------|----------|
| H | -4.941519 | 1.855703 | 2.635462 |
|---|-----------|----------|----------|

Vibrational frequencies

|           |          |          |
|-----------|----------|----------|
| -417.7543 | 9.0052   | 12.7127  |
| 17.0149   | 19.8232  | 22.6121  |
| 24.9100   | 27.1977  | 31.0059  |
| 34.3054   | 34.8567  | 41.3616  |
| 46.4098   | 49.6283  | 53.9225  |
| 60.5461   | 67.0040  | 71.5518  |
| 75.1540   | 80.0517  | 82.7569  |
| 85.3512   | 93.3044  | 98.4647  |
| 98.6244   | 102.0012 | 108.6213 |
| 114.1757  | 121.5550 | 124.0423 |

**M2c**

|                                              |              |              |
|----------------------------------------------|--------------|--------------|
| Zero-point correction=                       | 0.717857     |              |
| Thermal correction to Energy=                | 0.774816     |              |
| Thermal correction to Enthalpy=              | 0.775760     |              |
| Thermal correction to Gibbs Free Energy=     |              | 0.620112     |
| Sum of electronic and zero-point Energies=   |              | -3384.708760 |
| Sum of electronic and thermal Energies=      | -3384.651801 |              |
| Sum of electronic and thermal Enthalpies=    |              | -3384.650857 |
| Sum of electronic and thermal Free Energies= |              | -3384.806505 |

Cartesian coordinates

|   |           |           |           |
|---|-----------|-----------|-----------|
| C | 0.224130  | -0.920424 | -1.018923 |
| N | -0.915892 | -0.117134 | -1.523376 |
| C | -1.029920 | -0.235943 | -2.989046 |
| C | -0.608961 | -1.686221 | -3.220520 |
| C | 0.471439  | -1.951985 | -2.151523 |
| H | -0.085448 | -1.400548 | -0.087914 |
| H | -2.055855 | -0.048614 | -3.301337 |
| H | -0.349643 | 0.484806  | -3.451776 |
| H | -1.486387 | -2.315265 | -3.051731 |
| H | -0.240579 | -1.849972 | -4.235930 |
| H | 0.400714  | -2.973127 | -1.770184 |
| H | 1.470982  | -1.816842 | -2.564096 |
| C | -1.796151 | 0.460921  | -0.734326 |
| C | -2.926653 | 1.194998  | -1.128621 |
| H | -1.650727 | 0.296155  | 0.326626  |
| H | -3.104179 | 1.396828  | -2.176295 |
| C | -3.904573 | 1.432235  | -0.196804 |
| C | -5.339566 | 1.540247  | -0.579680 |
| H | -3.706480 | 1.234588  | 0.854554  |

|    |           |           |           |
|----|-----------|-----------|-----------|
| C  | 1.457288  | 0.017828  | -0.713334 |
| O  | 1.850613  | 0.569101  | -1.951937 |
| Si | 3.270758  | 0.739481  | -2.865420 |
| C  | 2.582647  | 1.218966  | -4.542153 |
| H  | 3.389811  | 1.408291  | -5.259175 |
| H  | 1.950516  | 0.425708  | -4.956128 |
| H  | 1.979026  | 2.131162  | -4.477800 |
| C  | 4.245023  | -0.863971 | -2.971448 |
| H  | 4.659551  | -1.170407 | -2.006993 |
| H  | 3.645969  | -1.693282 | -3.362203 |
| H  | 5.088345  | -0.722321 | -3.659157 |
| C  | 4.351171  | 2.116691  | -2.175403 |
| H  | 4.988706  | 2.514704  | -2.974565 |
| H  | 3.752179  | 2.952067  | -1.795312 |
| H  | 5.015050  | 1.778157  | -1.374766 |
| C  | 0.963009  | 1.141524  | 0.210153  |
| C  | 0.810193  | 2.443639  | -0.258468 |
| C  | 0.206598  | 3.414959  | 0.545273  |
| C  | -0.298143 | 3.092768  | 1.801064  |
| C  | -0.140777 | 1.786176  | 2.266384  |
| C  | 0.518887  | 0.829348  | 1.499611  |
| H  | 1.132191  | 2.690268  | -1.262081 |
| H  | -0.811666 | 3.834607  | 2.399737  |
| H  | 0.633993  | -0.176980 | 1.889410  |
| C  | 2.618222  | -0.716644 | -0.022276 |
| C  | 2.733478  | -2.104759 | 0.065735  |
| C  | 3.869640  | -2.686837 | 0.635043  |
| C  | 4.914659  | -1.903865 | 1.115787  |
| C  | 4.790011  | -0.516598 | 1.049825  |
| C  | 3.651726  | 0.069149  | 0.504249  |
| H  | 1.953878  | -2.758941 | -0.298391 |
| H  | 5.795226  | -2.361785 | 1.548629  |
| H  | 3.570987  | 1.149739  | 0.489720  |
| C  | 0.105925  | 4.816591  | 0.004753  |
| C  | -0.835759 | 1.332756  | 3.519407  |
| C  | 3.975615  | -4.189110 | 0.653575  |
| C  | 5.905652  | 0.381561  | 1.512648  |
| F  | 6.603866  | 0.871724  | 0.455792  |
| F  | 6.785119  | -0.259399 | 2.307097  |
| F  | 5.434284  | 1.449562  | 2.192721  |
| F  | 4.329902  | -4.670323 | -0.561151 |
| F  | 4.894120  | -4.623498 | 1.540112  |
| F  | 2.792969  | -4.764684 | 0.970620  |
| F  | -1.996109 | 0.693290  | 3.195270  |

|   |           |           |           |
|---|-----------|-----------|-----------|
| F | -1.157604 | 2.352003  | 4.336200  |
| F | -0.094772 | 0.450972  | 4.223307  |
| F | -0.657295 | 5.614312  | 0.778049  |
| F | 1.328485  | 5.391089  | -0.089476 |
| F | -0.422472 | 4.824960  | -1.240896 |
| N | -5.649908 | 0.075258  | -0.628549 |
| N | -5.223149 | -0.643554 | -1.746520 |
| C | -6.207678 | -0.482531 | 0.505890  |
| C | -4.266578 | -1.563091 | -1.501397 |
| O | -6.386299 | 0.123471  | 1.557097  |
| O | -3.770381 | -2.303486 | -2.358565 |
| O | -3.822395 | -1.654808 | -0.173345 |
| O | -6.580959 | -1.760130 | 0.299996  |
| C | -7.056768 | -2.453214 | 1.469694  |
| H | -7.959679 | -1.959558 | 1.845297  |
| H | -6.296872 | -2.393361 | 2.257048  |
| C | -7.327061 | -3.885407 | 1.056114  |
| H | -6.414760 | -4.360001 | 0.682174  |
| H | -7.691486 | -4.458950 | 1.914765  |
| H | -8.082617 | -3.926032 | 0.265960  |
| C | -2.931056 | -2.727648 | 0.111439  |
| H | -3.394416 | -3.686408 | -0.150980 |
| H | -2.025370 | -2.642872 | -0.502735 |
| C | -2.606913 | -2.661452 | 1.594126  |
| H | -1.882536 | -3.437358 | 1.865558  |
| H | -2.194150 | -1.685189 | 1.871778  |
| H | -3.509989 | -2.811327 | 2.193691  |
| C | -5.681795 | 2.235177  | -1.889642 |
| H | -5.233968 | 1.723752  | -2.743098 |
| H | -6.765763 | 2.232980  | -2.034101 |
| H | -5.335698 | 3.273468  | -1.862161 |
| H | -5.927665 | 1.948883  | 0.240942  |

Vibrational frequencies

|          |          |          |
|----------|----------|----------|
| 8.6553   | 13.3267  | 18.1572  |
| 19.7848  | 24.2599  | 25.2872  |
| 28.1757  | 33.3366  | 34.0620  |
| 37.4422  | 38.7322  | 42.7459  |
| 46.4202  | 51.8270  | 54.8172  |
| 69.9179  | 74.1888  | 77.7098  |
| 78.3536  | 86.9615  | 91.0886  |
| 98.9408  | 100.5927 | 105.5424 |
| 105.8499 | 109.3072 | 113.9353 |
| 125.8492 | 129.6005 | 139.3082 |

**1d**

|                                              |             |             |
|----------------------------------------------|-------------|-------------|
| Zero-point correction=                       | 0.205697    |             |
| Thermal correction to Energy=                | 0.217936    |             |
| Thermal correction to Enthalpy=              | 0.218880    |             |
| Thermal correction to Gibbs Free Energy=     |             | 0.165870    |
| Sum of electronic and zero-point Energies=   |             | -576.695413 |
| Sum of electronic and thermal Energies=      | -576.683174 |             |
| Sum of electronic and thermal Enthalpies=    |             | -576.682230 |
| Sum of electronic and thermal Free Energies= |             | -576.735240 |

## Cartesian coordinates

|   |           |           |           |
|---|-----------|-----------|-----------|
| C | 3.593044  | 1.536202  | -0.065354 |
| C | 2.252786  | 1.163006  | -0.092814 |
| C | 1.885530  | -0.196213 | -0.015397 |
| C | 2.905854  | -1.161463 | 0.085079  |
| C | 4.248079  | -0.785381 | 0.115330  |
| C | 4.595987  | 0.565013  | 0.040456  |
| H | 3.859950  | 2.587173  | -0.128509 |
| H | 1.488290  | 1.928603  | -0.180885 |
| H | 2.636468  | -2.212869 | 0.141873  |
| H | 5.020389  | -1.544805 | 0.195304  |
| H | 5.640613  | 0.861594  | 0.061143  |
| C | 0.495152  | -0.650832 | -0.035208 |
| H | 0.351852  | -1.730453 | -0.048349 |
| C | -0.615919 | 0.109886  | -0.029821 |
| H | -0.587906 | 1.194123  | -0.001056 |
| C | -1.948700 | -0.521322 | -0.053288 |
| O | -2.922535 | 0.412641  | 0.006426  |
| C | -4.285877 | -0.081240 | -0.009396 |
| H | -4.413400 | -0.796373 | 0.809554  |
| H | -4.457086 | -0.615119 | -0.950258 |
| C | -5.202144 | 1.115093  | 0.137137  |
| H | -6.244792 | 0.782070  | 0.126065  |
| H | -5.017388 | 1.636327  | 1.081631  |
| H | -5.058214 | 1.822667  | -0.685291 |
| O | -2.172656 | -1.721319 | -0.116622 |

## Vibrational frequencies

|          |          |          |
|----------|----------|----------|
| 39.0739  | 63.2203  | 70.9224  |
| 92.6813  | 112.7625 | 184.0026 |
| 192.6875 | 238.8041 | 280.2768 |
| 291.6044 | 324.5719 | 390.8834 |
| 414.0853 | 500.5441 | 521.9026 |

|          |           |           |
|----------|-----------|-----------|
| 585.4505 | 631.4924  | 697.1435  |
| 724.0013 | 751.4064  | 784.3324  |
| 830.0877 | 853.6677  | 859.5590  |
| 889.2190 | 904.7981  | 942.7975  |
| 985.6804 | 1005.4512 | 1010.8347 |

### 1d+B•

|                                              |          |             |
|----------------------------------------------|----------|-------------|
| Zero-point correction=                       | 0.356652 |             |
| Thermal correction to Energy=                | 0.379127 |             |
| Thermal correction to Enthalpy=              | 0.380071 |             |
| Thermal correction to Gibbs Free Energy=     |          | 0.303205    |
| Sum of electronic and zero-point Energies=   |          | -907.469593 |
| Sum of electronic and thermal Energies=      |          | -907.447118 |
| Sum of electronic and thermal Enthalpies=    |          | -907.446173 |
| Sum of electronic and thermal Free Energies= |          | -907.523040 |

### Cartesian coordinates

|   |           |           |           |
|---|-----------|-----------|-----------|
| C | 0.500717  | -1.349936 | 0.677133  |
| C | -0.592408 | -1.385157 | -0.108092 |
| H | -0.541726 | -1.372983 | -1.190479 |
| C | -1.935618 | -1.363227 | 0.492811  |
| O | -2.886810 | -1.232457 | -0.458343 |
| C | -4.258748 | -1.188298 | 0.007801  |
| H | -4.362146 | -0.376886 | 0.734274  |
| H | -4.486504 | -2.128355 | 0.521134  |
| C | -5.141444 | -0.977469 | -1.203895 |
| H | -6.190228 | -0.945756 | -0.892278 |
| H | -4.902167 | -0.033382 | -1.703635 |
| H | -5.020803 | -1.792422 | -1.924353 |
| O | -2.190429 | -1.432333 | 1.687585  |
| C | -1.077934 | 1.743626  | -1.279657 |
| C | 0.233102  | 1.796727  | -1.642610 |
| H | -1.967199 | 1.592638  | -1.870758 |
| H | 0.699055  | 1.709757  | -2.611390 |
| C | 0.140401  | 2.057149  | 0.612373  |
| N | -1.133080 | 1.904285  | 0.090743  |
| N | 0.972915  | 1.987844  | -0.492373 |
| C | -2.349050 | 1.934344  | 0.885563  |
| H | -2.458816 | 2.905389  | 1.377538  |
| H | -3.201354 | 1.767073  | 0.227108  |
| H | -2.322465 | 1.151673  | 1.647273  |
| C | 2.416117  | 2.142819  | -0.435874 |
| H | 2.851333  | 1.394038  | 0.228976  |
| H | 2.822840  | 2.012368  | -1.438531 |

|   |           |           |           |
|---|-----------|-----------|-----------|
| H | 2.676209  | 3.139793  | -0.066984 |
| B | 0.530945  | 2.228796  | 2.054828  |
| H | 1.687803  | 2.339339  | 2.349562  |
| H | -0.319271 | 2.258071  | 2.899430  |
| C | 1.897283  | -1.301115 | 0.245937  |
| C | 2.284627  | -1.303402 | -1.109242 |
| C | 2.900884  | -1.216937 | 1.229720  |
| C | 3.628680  | -1.221942 | -1.461056 |
| H | 1.532871  | -1.361642 | -1.889805 |
| C | 4.247276  | -1.135264 | 0.875490  |
| H | 2.614474  | -1.207522 | 2.277860  |
| C | 4.615441  | -1.135869 | -0.471776 |
| H | 3.910519  | -1.221622 | -2.509998 |
| H | 5.006410  | -1.068459 | 1.649284  |
| H | 5.662723  | -1.069383 | -0.751680 |
| H | 0.336838  | -1.338578 | 1.753026  |

#### Vibrational frequencies

|          |          |          |
|----------|----------|----------|
| 29.4572  | 36.8420  | 45.8119  |
| 50.7171  | 66.0596  | 68.8259  |
| 74.0834  | 81.6162  | 96.7408  |
| 114.0095 | 121.9827 | 156.5851 |
| 180.1057 | 184.2815 | 190.4089 |
| 195.9125 | 239.4845 | 242.9874 |
| 249.3019 | 277.2436 | 292.7843 |
| 308.4002 | 315.2780 | 326.9121 |
| 390.5870 | 410.8654 | 413.0537 |
| 472.4029 | 500.0719 | 523.6573 |

#### TSd

|                                              |          |             |
|----------------------------------------------|----------|-------------|
| Zero-point correction=                       | 0.356625 |             |
| Thermal correction to Energy=                | 0.378031 |             |
| Thermal correction to Enthalpy=              | 0.378975 |             |
| Thermal correction to Gibbs Free Energy=     |          | 0.304737    |
| Sum of electronic and zero-point Energies=   |          | -907.464927 |
| Sum of electronic and thermal Energies=      |          | -907.443521 |
| Sum of electronic and thermal Enthalpies=    |          | -907.442576 |
| Sum of electronic and thermal Free Energies= |          | -907.516815 |

#### Cartesian coordinates

|   |           |           |           |
|---|-----------|-----------|-----------|
| C | 0.375256  | -1.886721 | 0.130180  |
| H | 0.234628  | -2.740492 | 0.789970  |
| C | -0.733319 | -1.141570 | -0.176812 |
| H | -0.695706 | -0.342674 | -0.906356 |



|   |           |           |           |
|---|-----------|-----------|-----------|
| C | -2.073232 | -1.582233 | 0.226967  |
| O | -3.035445 | -0.901035 | -0.452278 |
| C | -4.402072 | -1.183645 | -0.080482 |
| H | -4.523623 | -1.008086 | 0.993919  |
| H | -4.616233 | -2.240514 | -0.272674 |
| C | -5.290895 | -0.272313 | -0.901711 |
| H | -6.341235 | -0.464420 | -0.660195 |
| H | -5.074796 | 0.779482  | -0.688826 |
| H | -5.146574 | -0.447804 | -1.972453 |
| O | -2.335116 | -2.461383 | 1.037804  |
| C | 0.516590  | 3.112142  | -0.791777 |
| C | 1.611089  | 2.811940  | -0.037334 |
| H | 0.410867  | 3.738311  | -1.663605 |
| H | 2.639013  | 3.124258  | -0.130426 |
| C | -0.154798 | 1.721890  | 0.860434  |
| N | -0.556078 | 2.447274  | -0.236017 |
| N | 1.192507  | 1.972082  | 0.973482  |
| C | -1.922465 | 2.477493  | -0.742871 |
| H | -1.934254 | 3.036409  | -1.678685 |
| H | -2.279630 | 1.460376  | -0.916095 |
| H | -2.583528 | 2.966164  | -0.021722 |
| C | 2.065417  | 1.376760  | 1.975488  |
| H | 2.159227  | 0.301313  | 1.808219  |
| H | 3.049760  | 1.838349  | 1.895927  |
| H | 1.661327  | 1.553191  | 2.974478  |
| B | -1.003566 | 0.768297  | 1.688763  |
| H | -0.494239 | 0.174990  | 2.593130  |
| H | -2.192084 | 0.809719  | 1.586521  |
| C | 1.736526  | -1.588850 | -0.264107 |
| C | 2.079921  | -0.481332 | -1.078470 |
| C | 2.791693  | -2.404094 | 0.209566  |
| C | 3.406849  | -0.207110 | -1.391375 |
| H | 1.303610  | 0.178238  | -1.451573 |
| C | 4.118639  | -2.127883 | -0.110234 |
| H | 2.554192  | -3.257704 | 0.839750  |
| C | 4.437237  | -1.026615 | -0.912426 |
| H | 3.641983  | 0.654527  | -2.010433 |
| H | 4.908079  | -2.770488 | 0.270140  |
| H | 5.471913  | -0.807913 | -1.159495 |

Vibrational frequencies

|           |         |         |
|-----------|---------|---------|
| -189.5632 | 34.5807 | 38.3452 |
| 41.1036   | 51.9542 | 69.0249 |
| 80.6784   | 91.2059 | 96.9870 |

|          |          |          |
|----------|----------|----------|
| 111.5068 | 131.7215 | 146.5288 |
| 156.3917 | 168.0825 | 190.6096 |
| 210.8395 | 241.1348 | 264.3754 |
| 271.4245 | 300.9216 | 312.2563 |
| 316.7052 | 327.7116 | 330.1265 |
| 392.1442 | 419.9448 | 473.8774 |
| 506.2911 | 517.0920 | 532.3356 |

### TSd'

|                                              |             |             |
|----------------------------------------------|-------------|-------------|
| Zero-point correction=                       | 0.356822    |             |
| Thermal correction to Energy=                | 0.378029    |             |
| Thermal correction to Enthalpy=              | 0.378973    |             |
| Thermal correction to Gibbs Free Energy=     |             | 0.305755    |
| Sum of electronic and zero-point Energies=   |             | -907.464421 |
| Sum of electronic and thermal Energies=      | -907.443214 |             |
| Sum of electronic and thermal Enthalpies=    |             | -907.442270 |
| Sum of electronic and thermal Free Energies= |             | -907.515488 |

### Cartesian coordinates

|   |           |           |           |
|---|-----------|-----------|-----------|
| C | 0.110238  | -1.437820 | 0.460752  |
| C | -1.009480 | -1.147446 | -0.289848 |
| H | -0.937985 | -0.755493 | -1.298186 |
| C | -2.332828 | -1.249964 | 0.281098  |
| O | -3.288287 | -0.804040 | -0.595321 |
| C | -4.644616 | -0.812995 | -0.106484 |
| H | -4.701383 | -0.224003 | 0.815632  |
| H | -4.934475 | -1.840371 | 0.141623  |
| C | -5.525416 | -0.232611 | -1.194400 |
| H | -6.569289 | -0.230692 | -0.864340 |
| H | -5.236160 | 0.797852  | -1.424719 |
| H | -5.455911 | -0.824843 | -2.112295 |
| O | -2.622022 | -1.655660 | 1.406184  |
| C | 0.109672  | 2.931630  | -0.824189 |
| C | 1.463481  | 2.819236  | -0.733244 |
| H | -0.509439 | 3.485845  | -1.511883 |
| H | 2.250273  | 3.255721  | -1.327998 |
| C | 0.564953  | 1.569778  | 0.920780  |
| N | -0.431823 | 2.166147  | 0.188722  |
| N | 1.732002  | 1.983821  | 0.329009  |
| C | -1.867203 | 2.076923  | 0.440073  |
| H | -2.279058 | 3.085189  | 0.533365  |
| H | -2.364125 | 1.552716  | -0.377913 |
| H | -2.037112 | 1.532109  | 1.365652  |
| C | 3.070343  | 1.646236  | 0.801299  |

|   |           |           |           |
|---|-----------|-----------|-----------|
| H | 3.183172  | 0.565456  | 0.870982  |
| H | 3.795727  | 2.038209  | 0.088722  |
| H | 3.246558  | 2.095179  | 1.782327  |
| B | 0.431636  | 0.541900  | 2.044461  |
| H | 1.426313  | 0.162189  | 2.585888  |
| H | -0.630268 | 0.358268  | 2.556854  |
| C | 1.482138  | -1.466036 | -0.054508 |
| C | 1.859539  | -0.828823 | -1.255340 |
| C | 2.480306  | -2.154592 | 0.667135  |
| C | 3.176855  | -0.876729 | -1.707533 |
| H | 1.123523  | -0.272449 | -1.826509 |
| C | 3.795520  | -2.204370 | 0.211985  |
| H | 2.211024  | -2.648828 | 1.597134  |
| C | 4.154053  | -1.561707 | -0.978706 |
| H | 3.444311  | -0.368745 | -2.630219 |
| H | 4.544054  | -2.742837 | 0.786871  |
| H | 5.180649  | -1.593238 | -1.331727 |
| H | -0.052689 | -1.933179 | 1.414188  |

#### Vibrational frequencies

|           |          |          |
|-----------|----------|----------|
| -173.1770 | 33.8046  | 39.2842  |
| 58.7406   | 70.5413  | 76.6511  |
| 77.1079   | 87.1870  | 94.2331  |
| 108.0986  | 137.4330 | 151.8464 |
| 179.3629  | 182.5791 | 199.7378 |
| 226.1099  | 238.4489 | 267.2753 |
| 272.0364  | 287.7644 | 308.6571 |
| 322.5908  | 339.7493 | 349.4323 |
| 390.6166  | 416.9490 | 470.5229 |
| 509.9912  | 524.7872 | 531.8788 |

#### M1d

|                                              |          |             |
|----------------------------------------------|----------|-------------|
| Zero-point correction=                       | 0.358608 |             |
| Thermal correction to Energy=                | 0.379880 |             |
| Thermal correction to Enthalpy=              | 0.380825 |             |
| Thermal correction to Gibbs Free Energy=     |          | 0.306504    |
| Sum of electronic and zero-point Energies=   |          | -907.488797 |
| Sum of electronic and thermal Energies=      |          | -907.467524 |
| Sum of electronic and thermal Enthalpies=    |          | -907.466580 |
| Sum of electronic and thermal Free Energies= |          | -907.540901 |

#### Cartesian coordinates

|   |           |           |          |
|---|-----------|-----------|----------|
| C | -0.100509 | -1.512033 | 0.384703 |
| H | -0.320082 | -2.196772 | 1.200273 |

|   |           |           |           |
|---|-----------|-----------|-----------|
| C | -1.129237 | -0.487489 | 0.100223  |
| H | -1.096455 | -0.128698 | -0.932149 |
| C | -2.516348 | -0.964068 | 0.401042  |
| O | -3.431325 | -0.354984 | -0.389842 |
| C | -4.820457 | -0.647070 | -0.106174 |
| H | -5.024265 | -0.429506 | 0.947520  |
| H | -5.002647 | -1.714968 | -0.267869 |
| C | -5.659758 | 0.211739  | -1.029457 |
| H | -6.722111 | 0.017697  | -0.849868 |
| H | -5.468294 | 1.274870  | -0.853007 |
| H | -5.440999 | -0.011619 | -2.078456 |
| O | -2.828421 | -1.760075 | 1.272920  |
| C | 1.963876  | 2.826026  | -0.447854 |
| C | 2.639454  | 2.184581  | 0.541473  |
| H | 2.300415  | 3.507513  | -1.212894 |
| H | 3.683971  | 2.188567  | 0.809441  |
| C | 0.471535  | 1.594682  | 0.708779  |
| N | 0.637697  | 2.453896  | -0.328968 |
| N | 1.708411  | 1.438227  | 1.241822  |
| C | -0.436155 | 2.923364  | -1.201806 |
| H | 0.005129  | 3.518814  | -2.000917 |
| H | -0.966219 | 2.074062  | -1.634421 |
| H | -1.140625 | 3.536816  | -0.636874 |
| C | 2.069607  | 0.562008  | 2.352962  |
| H | 2.639692  | -0.290459 | 1.977410  |
| H | 2.674194  | 1.122492  | 3.068964  |
| H | 1.163258  | 0.205804  | 2.836680  |
| B | -0.904934 | 0.874497  | 1.111149  |
| H | -0.878933 | 0.517291  | 2.271946  |
| H | -1.823528 | 1.651774  | 0.925516  |
| C | 1.176195  | -1.599006 | -0.217897 |
| C | 1.599450  | -0.751999 | -1.287994 |
| C | 2.126875  | -2.553266 | 0.261790  |
| C | 2.879898  | -0.846486 | -1.816305 |
| H | 0.914136  | -0.013759 | -1.690125 |
| C | 3.402116  | -2.639606 | -0.276850 |
| H | 1.835357  | -3.214650 | 1.074169  |
| C | 3.796187  | -1.785689 | -1.319957 |
| H | 3.172999  | -0.181078 | -2.624301 |
| H | 4.101900  | -3.373113 | 0.115420  |
| H | 4.796613  | -1.852076 | -1.736874 |

Vibrational frequencies

25.4168

33.5546

56.4272

|          |          |          |
|----------|----------|----------|
| 57.2234  | 66.1103  | 80.3034  |
| 89.5593  | 90.4845  | 100.3606 |
| 108.4489 | 127.5996 | 165.5360 |
| 167.7017 | 190.8468 | 200.7408 |
| 253.3586 | 281.9737 | 288.7860 |
| 303.8208 | 312.7105 | 332.3541 |
| 342.4416 | 386.0271 | 393.3881 |
| 422.0880 | 472.3189 | 492.9040 |
| 521.4870 | 575.2969 | 577.9973 |

### 1e

|                                              |             |             |
|----------------------------------------------|-------------|-------------|
| Zero-point correction=                       | 0.151544    |             |
| Thermal correction to Energy=                | 0.161025    |             |
| Thermal correction to Enthalpy=              | 0.161969    |             |
| Thermal correction to Gibbs Free Energy=     |             | 0.116232    |
| Sum of electronic and zero-point Energies=   |             | -384.991909 |
| Sum of electronic and thermal Energies=      | -384.982429 |             |
| Sum of electronic and thermal Enthalpies=    |             | -384.981485 |
| Sum of electronic and thermal Free Energies= |             | -385.027221 |

### Cartesian coordinates

|   |           |           |           |
|---|-----------|-----------|-----------|
| C | 2.440314  | 0.147931  | 0.000019  |
| H | 2.484992  | 1.236762  | 0.000033  |
| C | 1.230119  | -0.427650 | -0.000067 |
| H | 1.110411  | -1.507436 | -0.000079 |
| C | -0.002016 | 0.387474  | -0.000148 |
| O | -1.098876 | -0.400791 | -0.000052 |
| C | -2.377937 | 0.281996  | 0.000022  |
| H | -2.436508 | 0.924675  | -0.884585 |
| H | -2.436394 | 0.924701  | 0.884617  |
| C | -3.458774 | -0.778615 | 0.000108  |
| H | -4.442639 | -0.298897 | 0.000169  |
| H | -3.385373 | -1.413121 | -0.888550 |
| H | -3.385252 | -1.413098 | 0.888772  |
| O | -0.054473 | 1.607989  | -0.000052 |
| C | 3.741126  | -0.583536 | 0.000089  |
| H | 4.337818  | -0.303987 | 0.878111  |
| H | 3.604828  | -1.668797 | 0.000083  |
| H | 4.337909  | -0.303990 | -0.877873 |

### Vibrational frequencies

|          |          |          |
|----------|----------|----------|
| 32.8389  | 76.9536  | 121.9086 |
| 148.3164 | 210.2774 | 227.0384 |
| 252.7991 | 270.8929 | 352.8230 |

|           |           |           |
|-----------|-----------|-----------|
| 401.6108  | 463.7234  | 700.9228  |
| 755.8641  | 813.7472  | 853.2263  |
| 887.3205  | 929.9184  | 1006.6686 |
| 1011.4471 | 1060.3663 | 1081.7022 |
| 1130.9734 | 1138.1420 | 1177.3389 |
| 1219.6174 | 1303.8936 | 1325.1210 |
| 1347.0199 | 1397.9733 | 1407.6380 |

**1e+B•**

|                                              |          |             |
|----------------------------------------------|----------|-------------|
| Zero-point correction=                       | 0.302634 |             |
| Thermal correction to Energy=                | 0.322332 |             |
| Thermal correction to Enthalpy=              | 0.323276 |             |
| Thermal correction to Gibbs Free Energy=     |          | 0.252703    |
| Sum of electronic and zero-point Energies=   |          | -715.762236 |
| Sum of electronic and thermal Energies=      |          | -715.742538 |
| Sum of electronic and thermal Enthalpies=    |          | -715.741594 |
| Sum of electronic and thermal Free Energies= |          | -715.812167 |

Cartesian coordinates

|   |           |           |           |
|---|-----------|-----------|-----------|
| C | 0.706806  | 2.399206  | 0.072927  |
| H | 0.530097  | 2.680020  | 1.110314  |
| C | -0.240973 | 1.686952  | -0.552348 |
| H | -0.126431 | 1.357828  | -1.580474 |
| C | -1.463718 | 1.267806  | 0.157596  |
| O | -2.236714 | 0.487237  | -0.628511 |
| C | -3.456008 | -0.024351 | -0.034458 |
| H | -4.140123 | 0.812824  | 0.141659  |
| H | -3.219742 | -0.474818 | 0.933733  |
| C | -4.037631 | -1.035244 | -0.999776 |
| H | -4.970579 | -1.437971 | -0.592815 |
| H | -4.254636 | -0.574580 | -1.968449 |
| H | -3.343791 | -1.867028 | -1.157699 |
| O | -1.759847 | 1.558991  | 1.308147  |
| C | 1.230022  | -1.542715 | -1.414119 |
| C | 0.136721  | -1.805245 | -0.647775 |
| H | 1.399951  | -1.684674 | -2.469796 |
| H | -0.827451 | -2.207963 | -0.912768 |
| C | 1.732451  | -0.937077 | 0.718056  |
| N | 2.198352  | -1.012044 | -0.583773 |
| N | 0.441803  | -1.435217 | 0.646959  |
| C | 3.533928  | -0.618312 | -0.996784 |
| H | 3.618698  | -0.741554 | -2.077071 |
| H | 3.719080  | 0.427155  | -0.739200 |
| H | 4.286535  | -1.240487 | -0.502812 |

|   |           |           |           |
|---|-----------|-----------|-----------|
| C | -0.449866 | -1.558933 | 1.787909  |
| H | 0.015987  | -2.169358 | 2.566557  |
| H | -0.684903 | -0.573495 | 2.197492  |
| H | -1.372076 | -2.039077 | 1.459807  |
| B | 2.453995  | -0.411516 | 1.928619  |
| H | 1.899845  | -0.397769 | 2.991503  |
| H | 3.580137  | -0.012791 | 1.823403  |
| C | 1.992888  | 2.843242  | -0.540160 |
| H | 2.838676  | 2.509326  | 0.072495  |
| H | 2.119359  | 2.461217  | -1.557034 |
| H | 2.045073  | 3.939800  | -0.567744 |

Vibrational frequencies

|          |          |          |
|----------|----------|----------|
| 23.0402  | 30.5468  | 46.5588  |
| 58.6136  | 72.3752  | 81.1000  |
| 105.2274 | 123.9276 | 130.2878 |
| 133.5954 | 160.8109 | 162.5154 |
| 183.2176 | 205.5416 | 231.0076 |
| 238.9211 | 243.6676 | 255.6999 |
| 290.3121 | 304.6114 | 309.1514 |
| 355.4088 | 404.6290 | 413.7281 |
| 467.1672 | 470.5680 | 576.5395 |
| 593.8574 | 631.7595 | 700.4564 |

**TSe**

|                                              |          |             |
|----------------------------------------------|----------|-------------|
| Zero-point correction=                       | 0.302419 |             |
| Thermal correction to Energy=                | 0.321050 |             |
| Thermal correction to Enthalpy=              | 0.321994 |             |
| Thermal correction to Gibbs Free Energy=     |          | 0.254359    |
| Sum of electronic and zero-point Energies=   |          | -715.748756 |
| Sum of electronic and thermal Energies=      |          | -715.730125 |
| Sum of electronic and thermal Enthalpies=    |          | -715.729181 |
| Sum of electronic and thermal Free Energies= |          | -715.796815 |

Cartesian coordinates

|   |          |           |           |
|---|----------|-----------|-----------|
| C | 0.083452 | 2.640988  | -0.536184 |
| H | 0.586519 | 3.404501  | 0.053687  |
| C | 0.567552 | 1.344235  | -0.465345 |
| H | 0.212104 | 0.604801  | -1.176920 |
| C | 1.908055 | 1.101904  | 0.091384  |
| O | 2.422760 | -0.082236 | -0.343415 |
| C | 3.686465 | -0.478841 | 0.231313  |
| H | 3.601513 | -0.474132 | 1.323437  |
| H | 4.454584 | 0.251538  | -0.045211 |

|   |           |           |           |
|---|-----------|-----------|-----------|
| C | 4.010623  | -1.860682 | -0.299673 |
| H | 4.978866  | -2.190734 | 0.090568  |
| H | 3.250607  | -2.586038 | 0.007854  |
| H | 4.063981  | -1.855709 | -1.393003 |
| O | 2.530919  | 1.850667  | 0.832723  |
| C | -2.418398 | -2.150836 | -0.737780 |
| C | -3.363927 | -1.225399 | -0.421230 |
| H | -2.474345 | -3.037774 | -1.348946 |
| H | -4.402359 | -1.150501 | -0.702789 |
| C | -1.445007 | -0.619518 | 0.612404  |
| N | -1.251299 | -1.773026 | -0.104126 |
| N | -2.762393 | -0.296243 | 0.407761  |
| C | 0.013876  | -2.494995 | -0.173605 |
| H | -0.090529 | -3.310752 | -0.889417 |
| H | 0.809353  | -1.821362 | -0.494162 |
| H | 0.269871  | -2.904882 | 0.807498  |
| C | -3.434844 | 0.872438  | 0.958223  |
| H | -3.175805 | 1.770616  | 0.391462  |
| H | -4.512186 | 0.711783  | 0.904636  |
| H | -3.142615 | 1.010660  | 1.999921  |
| B | -0.373247 | 0.178532  | 1.370911  |
| H | -0.726503 | 1.121952  | 2.017426  |
| H | 0.599748  | -0.424447 | 1.721015  |
| C | -1.176029 | 3.022933  | -1.240264 |
| H | -1.590889 | 2.189123  | -1.816907 |
| H | -1.951428 | 3.356891  | -0.532153 |
| H | -1.018762 | 3.865889  | -1.927925 |

#### Vibrational frequencies

|           |          |          |
|-----------|----------|----------|
| -370.1683 | 31.3458  | 53.6074  |
| 57.6085   | 73.5323  | 79.9985  |
| 88.3192   | 103.7868 | 112.9733 |
| 130.0485  | 141.6215 | 154.2627 |
| 176.6233  | 188.7984 | 235.3535 |
| 260.1690  | 266.2348 | 278.4359 |
| 301.3287  | 325.8358 | 336.1921 |
| 356.0815  | 395.6467 | 467.9745 |
| 476.6908  | 579.7161 | 604.6116 |
| 646.3595  | 671.2254 | 692.2930 |

#### TSe'

|                                 |          |
|---------------------------------|----------|
| Zero-point correction=          | 0.302827 |
| Thermal correction to Energy=   | 0.321315 |
| Thermal correction to Enthalpy= | 0.322259 |



|                                              |             |
|----------------------------------------------|-------------|
| Thermal correction to Gibbs Free Energy=     | 0.255035    |
| Sum of electronic and zero-point Energies=   | -715.753082 |
| Sum of electronic and thermal Energies=      | -715.734594 |
| Sum of electronic and thermal Enthalpies=    | -715.733650 |
| Sum of electronic and thermal Free Energies= | -715.800875 |

Cartesian coordinates

|   |           |           |           |
|---|-----------|-----------|-----------|
| C | 0.253240  | 2.107560  | -0.212780 |
| H | 0.007244  | 2.728180  | 0.644865  |
| C | -0.724373 | 1.265558  | -0.682634 |
| H | -0.575963 | 0.700536  | -1.598815 |
| C | -1.934590 | 1.002965  | 0.067173  |
| O | -2.715468 | 0.068868  | -0.560412 |
| C | -3.930253 | -0.300813 | 0.122714  |
| H | -4.555136 | 0.588674  | 0.260852  |
| H | -3.682482 | -0.686596 | 1.118001  |
| C | -4.627602 | -1.346685 | -0.723441 |
| H | -5.560131 | -1.653661 | -0.238989 |
| H | -4.868370 | -0.950044 | -1.714911 |
| H | -3.996907 | -2.232782 | -0.848483 |
| O | -2.261411 | 1.507553  | 1.140365  |
| C | 2.832228  | -1.735203 | -0.804567 |
| C | 1.614510  | -2.265199 | -0.511779 |
| H | 3.613599  | -2.081836 | -1.462398 |
| H | 1.129109  | -3.161317 | -0.865344 |
| C | 1.833506  | -0.359847 | 0.689916  |
| N | 2.958623  | -0.573074 | -0.070330 |
| N | 1.009672  | -1.420069 | 0.399037  |
| C | 4.143882  | 0.275724  | -0.057000 |
| H | 4.896651  | -0.171298 | -0.706706 |
| H | 3.902765  | 1.275843  | -0.419708 |
| H | 4.540865  | 0.349578  | 0.958348  |
| C | -0.297640 | -1.689653 | 0.987678  |
| H | -0.260070 | -2.622370 | 1.557823  |
| H | -0.570382 | -0.872347 | 1.650508  |
| H | -1.047834 | -1.773008 | 0.199308  |
| B | 1.524468  | 0.867479  | 1.545827  |
| H | 0.604439  | 0.832956  | 2.308357  |
| H | 2.389421  | 1.679143  | 1.704210  |
| C | 1.399360  | 2.550479  | -1.083540 |
| H | 2.217424  | 2.975251  | -0.497990 |
| H | 1.793565  | 1.722339  | -1.681884 |
| H | 1.063209  | 3.326681  | -1.787199 |

Vibrational frequencies

|           |          |          |
|-----------|----------|----------|
| -266.9174 | 25.2354  | 44.3301  |
| 56.2158   | 67.8867  | 92.9561  |
| 103.6632  | 116.5285 | 121.3636 |
| 135.5086  | 165.1250 | 168.2640 |
| 194.5914  | 213.0245 | 248.3452 |
| 256.6718  | 262.5938 | 282.7781 |
| 302.0443  | 330.7210 | 336.3510 |
| 357.5869  | 397.8903 | 464.7236 |
| 468.2274  | 557.0786 | 578.3342 |
| 611.9941  | 658.0506 | 683.2756 |

**M1e**

|                                              |          |             |
|----------------------------------------------|----------|-------------|
| Zero-point correction=                       | 0.305157 |             |
| Thermal correction to Energy=                | 0.323274 |             |
| Thermal correction to Enthalpy=              | 0.324219 |             |
| Thermal correction to Gibbs Free Energy=     |          | 0.257018    |
| Sum of electronic and zero-point Energies=   |          | -715.772759 |
| Sum of electronic and thermal Energies=      |          | -715.754642 |
| Sum of electronic and thermal Enthalpies=    |          | -715.753698 |
| Sum of electronic and thermal Free Energies= |          | -715.820899 |

Cartesian coordinates

|   |           |           |           |
|---|-----------|-----------|-----------|
| C | -0.293484 | -1.967026 | 0.038776  |
| H | 0.163192  | -2.765406 | 0.637658  |
| C | 0.761166  | -1.129143 | -0.536605 |
| H | 0.538199  | -0.500666 | -1.395607 |
| C | 2.044292  | -0.948360 | 0.089768  |
| O | 2.773799  | 0.035450  | -0.526254 |
| C | 4.067933  | 0.314920  | 0.045643  |
| H | 4.699966  | -0.577129 | -0.034694 |
| H | 3.951434  | 0.541540  | 1.111200  |
| C | 4.655900  | 1.486639  | -0.714190 |
| H | 5.645848  | 1.728926  | -0.314514 |
| H | 4.762297  | 1.250151  | -1.777653 |
| H | 4.019629  | 2.372244  | -0.617323 |
| O | 2.473695  | -1.570786 | 1.062148  |
| C | -3.209155 | 1.681291  | -0.542152 |
| C | -2.063943 | 2.362592  | -0.283545 |
| H | -4.125374 | 1.985005  | -1.023385 |
| H | -1.778896 | 3.381284  | -0.493819 |
| C | -1.806240 | 0.270481  | 0.523730  |
| N | -3.035204 | 0.403217  | -0.039703 |
| N | -1.217083 | 1.486319  | 0.372192  |

|   |           |           |           |
|---|-----------|-----------|-----------|
| C | -4.057617 | -0.635304 | -0.150263 |
| H | -5.026397 | -0.207825 | 0.115290  |
| H | -4.096462 | -1.014696 | -1.173818 |
| H | -3.818226 | -1.449105 | 0.530027  |
| C | 0.135677  | 1.850242  | 0.791218  |
| H | 0.435595  | 1.222671  | 1.628223  |
| H | 0.841477  | 1.711355  | -0.030101 |
| H | 0.134357  | 2.896754  | 1.100148  |
| B | -1.152120 | -1.047377 | 1.182130  |
| H | -0.402907 | -0.705164 | 2.078856  |
| H | -2.037360 | -1.758295 | 1.629283  |
| C | -1.225387 | -2.564566 | -1.026675 |
| H | -2.023173 | -3.153799 | -0.562638 |
| H | -1.703592 | -1.776764 | -1.621371 |
| H | -0.687798 | -3.218851 | -1.725213 |

#### Vibrational frequencies

|          |          |          |
|----------|----------|----------|
| 16.0096  | 32.4173  | 48.8865  |
| 72.5360  | 83.0731  | 100.3352 |
| 116.5999 | 126.3179 | 132.5920 |
| 164.4792 | 192.5588 | 217.7958 |
| 256.2365 | 266.3785 | 268.9021 |
| 276.5234 | 291.1461 | 325.9989 |
| 343.6076 | 378.2441 | 397.9507 |
| 452.0819 | 465.8042 | 471.4723 |
| 572.5692 | 623.5892 | 626.4997 |
| 643.6699 | 704.8725 | 725.7229 |

#### II+III

|                                              |          |              |
|----------------------------------------------|----------|--------------|
| Zero-point correction=                       | 0.827001 |              |
| Thermal correction to Energy=                | 0.889028 |              |
| Thermal correction to Enthalpy=              | 0.889972 |              |
| Thermal correction to Gibbs Free Energy=     | 0.722356 |              |
| Sum of electronic and zero-point Energies=   |          | -3483.567918 |
| Sum of electronic and thermal Energies=      |          | -3483.505891 |
| Sum of electronic and thermal Enthalpies=    |          | -3483.504947 |
| Sum of electronic and thermal Free Energies= |          | -3483.672563 |

#### Cartesian coordinates

|   |           |           |          |
|---|-----------|-----------|----------|
| C | -1.275883 | -1.526113 | 2.985706 |
| C | -0.046803 | -1.391403 | 3.865220 |
| C | 1.061481  | -0.945337 | 2.937341 |
| C | 0.351099  | -0.043639 | 1.908761 |
| N | -1.057024 | -0.473365 | 2.003437 |

|    |           |           |           |
|----|-----------|-----------|-----------|
| H  | -2.193159 | -1.353766 | 3.555771  |
| H  | 1.456767  | -1.843926 | 2.457411  |
| H  | 0.414800  | 1.010475  | 2.204515  |
| H  | -1.314939 | -2.529179 | 2.539691  |
| H  | 1.863294  | -0.443645 | 3.478094  |
| F  | 0.247530  | -2.550583 | 4.532273  |
| F  | -0.270660 | -0.433483 | 4.834044  |
| C  | 1.025882  | -0.080594 | 0.475668  |
| C  | 2.444233  | 0.489865  | 0.698342  |
| C  | 2.651085  | 1.855225  | 0.507789  |
| C  | 3.522052  | -0.280015 | 1.157685  |
| C  | 3.909192  | 2.426796  | 0.699416  |
| H  | 1.828453  | 2.479873  | 0.195346  |
| C  | 4.773214  | 0.301098  | 1.363253  |
| H  | 3.407119  | -1.340618 | 1.343325  |
| C  | 4.987290  | 1.659410  | 1.125295  |
| H  | 5.965729  | 2.101901  | 1.266022  |
| C  | 1.018583  | -1.463806 | -0.204816 |
| C  | 2.101499  | -1.924867 | -0.959406 |
| C  | -0.150536 | -2.236421 | -0.218999 |
| C  | 2.020470  | -3.114111 | -1.687797 |
| H  | 3.021526  | -1.358008 | -1.011101 |
| C  | -0.217545 | -3.430874 | -0.930252 |
| H  | -1.038363 | -1.897807 | 0.287773  |
| C  | 0.863654  | -3.886446 | -1.681476 |
| H  | 0.801882  | -4.806516 | -2.249467 |
| C  | 4.055877  | 3.893192  | 0.409149  |
| C  | 5.891532  | -0.548833 | 1.899710  |
| C  | -1.533384 | -4.155028 | -0.958107 |
| C  | 3.207378  | -3.499117 | -2.524265 |
| F  | -1.408907 | -5.441520 | -1.348893 |
| F  | -2.405368 | -3.561895 | -1.812217 |
| F  | -2.132332 | -4.157562 | 0.258678  |
| F  | 3.070205  | -4.712620 | -3.097971 |
| F  | 3.412021  | -2.603533 | -3.524633 |
| F  | 4.349195  | -3.522808 | -1.795027 |
| F  | 5.870044  | -0.604100 | 3.255360  |
| F  | 5.813458  | -1.826429 | 1.459864  |
| F  | 7.107814  | -0.075222 | 1.547962  |
| F  | 5.332745  | 4.318645  | 0.497852  |
| F  | 3.618098  | 4.191584  | -0.843867 |
| F  | 3.318272  | 4.650292  | 1.256797  |
| O  | 0.269680  | 0.831164  | -0.319318 |
| Si | 0.160313  | 1.109187  | -2.003621 |

|   |           |           |           |
|---|-----------|-----------|-----------|
| C | -0.910850 | -0.247239 | -2.752454 |
| H | -1.798541 | -0.439080 | -2.141088 |
| H | -1.247949 | 0.024361  | -3.757768 |
| H | -0.349958 | -1.183423 | -2.833742 |
| C | 1.875227  | 1.066996  | -2.782678 |
| H | 2.330249  | 0.076076  | -2.689243 |
| H | 1.805757  | 1.277549  | -3.855497 |
| H | 2.559308  | 1.795989  | -2.338100 |
| C | -0.702900 | 2.836322  | -2.086144 |
| C | -0.565528 | 3.576358  | -3.467654 |
| C | -2.213406 | 2.629738  | -1.804187 |
| C | -0.166914 | 3.754336  | -0.963103 |
| H | -1.300724 | 4.395720  | -3.414096 |
| H | -2.383238 | 2.209523  | -0.810143 |
| H | -2.737485 | 3.594480  | -1.833047 |
| H | -2.704731 | 1.971918  | -2.526850 |
| H | -0.655590 | 4.737700  | -1.012966 |
| H | -0.380021 | 3.335073  | 0.025021  |
| H | 0.910819  | 3.929458  | -1.024191 |
| C | -0.954131 | 2.722435  | -4.687129 |
| H | -1.025128 | 3.352291  | -5.581488 |
| H | -0.206452 | 1.950683  | -4.902498 |
| H | -1.922226 | 2.229037  | -4.561720 |
| C | 0.796118  | 4.246394  | -3.722669 |
| H | 1.036436  | 5.000598  | -2.968387 |
| H | 1.618112  | 3.526465  | -3.748868 |
| H | 0.780713  | 4.757555  | -4.692517 |
| C | -2.070367 | 0.043592  | 1.249435  |
| C | -3.341701 | -0.493845 | 1.145232  |
| H | -1.790078 | 0.907772  | 0.665494  |
| H | -3.574828 | -1.395423 | 1.705814  |
| C | -4.326961 | 0.067426  | 0.316698  |
| C | -5.672677 | -0.408945 | 0.150710  |
| C | -6.258614 | -1.408738 | 0.971749  |
| C | -6.488560 | 0.153728  | -0.866852 |
| C | -7.572199 | -1.821397 | 0.773754  |
| H | -5.682223 | -1.850915 | 1.778826  |
| C | -7.800725 | -0.263179 | -1.057292 |
| H | -6.069737 | 0.929834  | -1.502342 |
| C | -8.356143 | -1.257236 | -0.240851 |
| H | -7.994188 | -2.587234 | 1.420198  |
| H | -8.397510 | 0.187436  | -1.846616 |
| H | -9.381554 | -1.583457 | -0.390012 |
| H | -4.043055 | 0.914228  | -0.300073 |

|   |           |          |           |
|---|-----------|----------|-----------|
| C | -5.804061 | 3.054909 | 0.830042  |
| C | -5.433375 | 3.892971 | -0.201420 |
| H | -6.815200 | 2.648835 | 0.787597  |
| H | -4.460106 | 4.370978 | -0.250116 |
| H | -6.127864 | 4.115620 | -1.005910 |
| C | -5.029233 | 2.639511 | 1.924242  |
| C | -3.615565 | 3.083758 | 2.145157  |
| H | -2.980088 | 2.229881 | 2.416461  |
| H | -3.170586 | 3.569026 | 1.273165  |
| H | -3.553662 | 3.790162 | 2.987167  |
| C | -5.627303 | 1.795251 | 3.010922  |
| H | -6.623159 | 1.424944 | 2.749619  |
| H | -4.987925 | 0.930418 | 3.236600  |
| H | -5.715403 | 2.363083 | 3.950735  |

#### Vibrational frequencies

|          |          |          |
|----------|----------|----------|
| 8.5035   | 11.9578  | 17.6442  |
| 18.4733  | 20.6081  | 23.8334  |
| 25.5990  | 26.1505  | 27.1456  |
| 28.6085  | 30.4390  | 32.3186  |
| 35.2215  | 37.7875  | 46.8127  |
| 54.7903  | 58.1338  | 59.8385  |
| 65.3138  | 72.7168  | 78.9218  |
| 91.3725  | 94.5169  | 95.0128  |
| 96.5131  | 101.7741 | 104.3995 |
| 107.1976 | 112.2061 | 116.1819 |

### III

|                                              |          |             |
|----------------------------------------------|----------|-------------|
| Zero-point correction=                       | 0.122595 |             |
| Thermal correction to Energy=                | 0.129260 |             |
| Thermal correction to Enthalpy=              | 0.130204 |             |
| Thermal correction to Gibbs Free Energy=     |          | 0.092226    |
| Sum of electronic and zero-point Energies=   |          | -195.801658 |
| Sum of electronic and thermal Energies=      |          | -195.794993 |
| Sum of electronic and thermal Enthalpies=    |          | -195.794049 |
| Sum of electronic and thermal Free Energies= |          | -195.832027 |

#### Cartesian coordinates

|   |           |           |           |
|---|-----------|-----------|-----------|
| C | 0.399034  | -0.034686 | -0.014722 |
| C | -0.845961 | -0.672232 | -0.010377 |
| H | -0.820333 | -1.763414 | -0.017095 |
| C | 0.562764  | 1.457754  | -0.003580 |
| H | 0.906963  | 1.806947  | 0.981725  |
| H | 1.330600  | 1.770503  | -0.723695 |

|   |           |           |           |
|---|-----------|-----------|-----------|
| H | -0.357693 | 1.997026  | -0.241094 |
| C | 1.669670  | -0.833292 | 0.007880  |
| H | 2.295801  | -0.609790 | -0.868732 |
| H | 2.282000  | -0.580050 | 0.886664  |
| H | 1.484788  | -1.911949 | 0.025815  |
| C | -2.099288 | -0.084664 | 0.008183  |
| H | -2.995309 | -0.697998 | 0.005480  |
| H | -2.244135 | 0.991446  | 0.026626  |

Vibrational frequencies

|           |           |           |
|-----------|-----------|-----------|
| 74.3318   | 158.7504  | 240.4619  |
| 300.2551  | 358.9743  | 400.5999  |
| 541.6306  | 571.8418  | 765.4124  |
| 770.0082  | 949.7839  | 979.3967  |
| 1004.5113 | 1019.0241 | 1072.0649 |
| 1079.9385 | 1237.8292 | 1256.3838 |
| 1367.5199 | 1413.6649 | 1424.8247 |
| 1458.9989 | 1471.9229 | 1477.8820 |
| 1484.2131 | 1516.8292 | 1533.2732 |
| 3000.5919 | 3010.3603 | 3041.1618 |

**(S)-<sup>os</sup>TSf**

|                                              |          |              |
|----------------------------------------------|----------|--------------|
| Zero-point correction=                       | 0.826842 |              |
| Thermal correction to Energy=                | 0.887996 |              |
| Thermal correction to Enthalpy=              | 0.888940 |              |
| Thermal correction to Gibbs Free Energy=     |          | 0.724773     |
| Sum of electronic and zero-point Energies=   |          | -3483.529288 |
| Sum of electronic and thermal Energies=      |          | -3483.468134 |
| Sum of electronic and thermal Enthalpies=    |          | -3483.467190 |
| Sum of electronic and thermal Free Energies= |          | -3483.631356 |

Cartesian coordinates

|   |           |           |           |
|---|-----------|-----------|-----------|
| C | -1.458649 | 1.455386  | -2.900411 |
| C | -0.561248 | 0.609134  | -3.787850 |
| C | 0.588279  | 0.179399  | -2.903035 |
| C | -0.102842 | -0.047571 | -1.549400 |
| N | -1.312089 | 0.806795  | -1.592150 |
| H | -2.491403 | 1.431603  | -3.251010 |
| H | 1.307467  | 1.001057  | -2.859932 |
| H | -0.444029 | -1.083726 | -1.486561 |
| H | -1.100654 | 2.490860  | -2.893783 |
| H | 1.082752  | -0.712434 | -3.286524 |
| F | -0.166100 | 1.262607  | -4.921370 |
| F | -1.265582 | -0.510009 | -4.209681 |

|    |           |           |           |
|----|-----------|-----------|-----------|
| C  | 0.824562  | 0.137298  | -0.291391 |
| C  | 1.728057  | -1.107427 | -0.325255 |
| C  | 1.293298  | -2.251119 | 0.344103  |
| C  | 2.881090  | -1.196632 | -1.110891 |
| C  | 2.016517  | -3.438830 | 0.277593  |
| H  | 0.377007  | -2.216723 | 0.914962  |
| C  | 3.601740  | -2.392050 | -1.171751 |
| H  | 3.226533  | -0.342607 | -1.682053 |
| C  | 3.184962  | -3.525019 | -0.474520 |
| H  | 3.749628  | -4.447367 | -0.523852 |
| C  | 1.580434  | 1.469867  | -0.243697 |
| C  | 2.889023  | 1.574927  | 0.231266  |
| C  | 0.885069  | 2.652136  | -0.521769 |
| C  | 3.483378  | 2.826173  | 0.413252  |
| H  | 3.456547  | 0.690053  | 0.489669  |
| C  | 1.489889  | 3.893244  | -0.354425 |
| H  | -0.148633 | 2.603263  | -0.833248 |
| C  | 2.796679  | 3.999807  | 0.120223  |
| H  | 3.258771  | 4.967649  | 0.268352  |
| C  | 1.458622  | -4.626903 | 1.004589  |
| C  | 4.872193  | -2.417732 | -1.973596 |
| C  | 0.654585  | 5.117405  | -0.591734 |
| C  | 4.881425  | 2.857662  | 0.960747  |
| F  | 1.397765  | 6.234858  | -0.735334 |
| F  | -0.199071 | 5.336556  | 0.440808  |
| F  | -0.112293 | 4.994397  | -1.702751 |
| F  | 5.324830  | 4.110553  | 1.190924  |
| F  | 4.962967  | 2.177973  | 2.132426  |
| F  | 5.762688  | 2.267189  | 0.116920  |
| F  | 4.725397  | -1.785271 | -3.162225 |
| F  | 5.883274  | -1.786961 | -1.326221 |
| F  | 5.293534  | -3.673790 | -2.234112 |
| F  | 2.333250  | -5.648444 | 1.089431  |
| F  | 1.084551  | -4.303331 | 2.269480  |
| F  | 0.342820  | -5.105427 | 0.391792  |
| O  | -0.048506 | 0.078239  | 0.831441  |
| Si | 0.176758  | 0.423831  | 2.489089  |
| C  | 0.282523  | 2.291179  | 2.716255  |
| H  | -0.480903 | 2.813873  | 2.131782  |
| H  | 0.149222  | 2.564658  | 3.766878  |
| H  | 1.260132  | 2.665717  | 2.397269  |
| C  | 1.768540  | -0.369355 | 3.106907  |
| H  | 2.634555  | 0.010675  | 2.555019  |
| H  | 1.922077  | -0.114297 | 4.161332  |



|   |           |           |           |
|---|-----------|-----------|-----------|
| H | 1.759120  | -1.459482 | 3.017876  |
| C | -1.431525 | -0.315084 | 3.244615  |
| C | -1.417789 | -0.503863 | 4.803503  |
| C | -2.587447 | 0.649601  | 2.875223  |
| C | -1.741283 | -1.675188 | 2.574751  |
| H | -2.471270 | -0.690777 | 5.067986  |
| H | -2.634124 | 0.837417  | 1.798613  |
| H | -3.551689 | 0.213861  | 3.171031  |
| H | -2.500278 | 1.620639  | 3.371052  |
| H | -2.638893 | -2.121605 | 3.024587  |
| H | -1.939104 | -1.555110 | 1.508406  |
| H | -0.930942 | -2.403476 | 2.678778  |
| C | -0.973952 | 0.737570  | 5.596095  |
| H | -1.176365 | 0.592824  | 6.662996  |
| H | 0.103246  | 0.914770  | 5.497407  |
| H | -1.495421 | 1.646483  | 5.284403  |
| C | -0.624665 | -1.724171 | 5.303246  |
| H | -1.004232 | -2.664740 | 4.896512  |
| H | 0.437526  | -1.654521 | 5.052620  |
| H | -0.697569 | -1.789642 | 6.394682  |
| C | -2.407611 | 0.357794  | -0.889318 |
| C | -3.701232 | 0.812913  | -0.966197 |
| H | -2.177878 | -0.447657 | -0.206221 |
| H | -3.945384 | 1.644060  | -1.622023 |
| C | -4.725653 | 0.148261  | -0.260705 |
| C | -6.125290 | 0.491726  | -0.249818 |
| C | -6.690133 | 1.503533  | -1.067970 |
| C | -7.006035 | -0.214153 | 0.609718  |
| C | -8.050891 | 1.789128  | -1.019122 |
| H | -6.056412 | 2.064751  | -1.747378 |
| C | -8.364724 | 0.075804  | 0.653094  |
| H | -6.599559 | -0.997596 | 1.244688  |
| C | -8.901562 | 1.081502  | -0.160903 |
| H | -8.454945 | 2.570423  | -1.657356 |
| H | -9.011700 | -0.482832 | 1.324014  |
| H | -9.962775 | 1.308378  | -0.128264 |
| H | -4.417790 | -0.616920 | 0.446551  |
| C | -3.615718 | -2.403704 | -2.195995 |
| C | -4.911403 | -2.187416 | -1.737180 |
| H | -3.346993 | -1.942941 | -3.147205 |
| H | -5.296236 | -2.656216 | -0.838477 |
| H | -5.623754 | -1.636815 | -2.339579 |
| C | -2.607492 | -3.130119 | -1.566726 |
| C | -2.804879 | -3.799024 | -0.233944 |

|   |           |           |           |
|---|-----------|-----------|-----------|
| H | -1.863529 | -3.852224 | 0.322327  |
| H | -3.541771 | -3.285968 | 0.390195  |
| H | -3.148457 | -4.837426 | -0.359963 |
| C | -1.322429 | -3.443496 | -2.283982 |
| H | -1.162898 | -2.791558 | -3.147475 |
| H | -0.454097 | -3.364796 | -1.619714 |
| H | -1.327594 | -4.484316 | -2.645438 |

Vibrational frequencies

|          |          |          |
|----------|----------|----------|
| -68.8968 | 12.7709  | 14.1236  |
| 18.0586  | 19.2975  | 20.5503  |
| 22.7839  | 23.5858  | 26.6978  |
| 27.6355  | 33.6085  | 35.9292  |
| 39.8761  | 42.1762  | 48.7908  |
| 51.3354  | 57.1734  | 58.9844  |
| 64.6952  | 73.3829  | 75.7572  |
| 82.9341  | 86.7102  | 94.7555  |
| 95.6995  | 99.5419  | 105.8031 |
| 109.0676 | 110.6276 | 113.9385 |

**(S)-<sup>os</sup>Tsf**

|                                              |          |              |
|----------------------------------------------|----------|--------------|
| Zero-point correction=                       | 0.826736 |              |
| Thermal correction to Energy=                | 0.887800 |              |
| Thermal correction to Enthalpy=              | 0.888744 |              |
| Thermal correction to Gibbs Free Energy=     |          | 0.724501     |
| Sum of electronic and zero-point Energies=   |          | -3483.523566 |
| Sum of electronic and thermal Energies=      |          | -3483.462503 |
| Sum of electronic and thermal Enthalpies=    |          | -3483.461559 |
| Sum of electronic and thermal Free Energies= |          | -3483.625802 |

Cartesian coordinates

|   |           |           |           |
|---|-----------|-----------|-----------|
| C | -1.595172 | 1.465468  | -2.493074 |
| C | -0.635339 | 1.055895  | -3.596242 |
| C | 0.617287  | 0.588235  | -2.885508 |
| C | 0.067591  | -0.086445 | -1.614208 |
| N | -1.272522 | 0.495860  | -1.448613 |
| H | -2.634152 | 1.371956  | -2.816241 |
| H | 1.208222  | 1.474612  | -2.641390 |
| H | -0.043547 | -1.165633 | -1.773823 |
| H | -1.402823 | 2.501956  | -2.191202 |
| H | 1.211483  | -0.080817 | -3.506715 |
| F | -0.405903 | 2.055527  | -4.500825 |
| F | -1.189180 | 0.004513  | -4.308017 |
| C | 1.012021  | 0.031183  | -0.354248 |

|    |           |           |           |
|----|-----------|-----------|-----------|
| C  | 2.226574  | -0.852557 | -0.691678 |
| C  | 2.230314  | -2.171768 | -0.241795 |
| C  | 3.290293  | -0.428374 | -1.497683 |
| C  | 3.304869  | -3.018890 | -0.502514 |
| H  | 1.395592  | -2.539100 | 0.335332  |
| C  | 4.353620  | -1.290257 | -1.774300 |
| H  | 3.313714  | 0.576357  | -1.902513 |
| C  | 4.384194  | -2.589752 | -1.268171 |
| H  | 5.225604  | -3.242514 | -1.463011 |
| C  | 1.368381  | 1.475778  | 0.032265  |
| C  | 2.651757  | 1.870041  | 0.418265  |
| C  | 0.332581  | 2.408725  | 0.165675  |
| C  | 2.890289  | 3.161995  | 0.894364  |
| H  | 3.480818  | 1.175255  | 0.381452  |
| C  | 0.582867  | 3.700648  | 0.616061  |
| H  | -0.685058 | 2.109739  | -0.038473 |
| C  | 1.864957  | 4.097735  | 0.990058  |
| H  | 2.054616  | 5.097137  | 1.360177  |
| C  | 3.252531  | -4.398506 | 0.087891  |
| C  | 5.461930  | -0.799138 | -2.662466 |
| C  | -0.594854 | 4.618158  | 0.770300  |
| C  | 4.293571  | 3.505222  | 1.305419  |
| F  | -0.236238 | 5.886046  | 1.059008  |
| F  | -1.420096 | 4.198002  | 1.762777  |
| F  | -1.347889 | 4.657517  | -0.358128 |
| F  | 4.383414  | 4.717386  | 1.891033  |
| F  | 4.785356  | 2.594505  | 2.182299  |
| F  | 5.139360  | 3.508191  | 0.245912  |
| F  | 5.111238  | -0.846643 | -3.971859 |
| F  | 5.783003  | 0.489719  | -2.398290 |
| F  | 6.589749  | -1.530540 | -2.530414 |
| F  | 4.419480  | -5.062897 | -0.030783 |
| F  | 2.945246  | -4.352993 | 1.413635  |
| F  | 2.293424  | -5.159385 | -0.492433 |
| O  | 0.270917  | -0.544445 | 0.717219  |
| Si | 0.525995  | -0.552553 | 2.408313  |
| C  | 0.063523  | 1.129001  | 3.120170  |
| H  | -0.867485 | 1.513188  | 2.693225  |
| H  | -0.063676 | 1.064624  | 4.205028  |
| H  | 0.851213  | 1.862208  | 2.920256  |
| C  | 2.338653  | -0.883353 | 2.798557  |
| H  | 2.976235  | -0.126346 | 2.329576  |
| H  | 2.496384  | -0.812151 | 3.880479  |
| H  | 2.680677  | -1.867481 | 2.469207  |

|   |           |           |           |
|---|-----------|-----------|-----------|
| C | -0.699965 | -1.929254 | 2.966298  |
| C | -0.441777 | -2.508659 | 4.402776  |
| C | -2.119701 | -1.306908 | 2.929586  |
| C | -0.690948 | -3.095362 | 1.949465  |
| H | -1.348484 | -3.091592 | 4.632934  |
| H | -2.346530 | -0.866488 | 1.954261  |
| H | -2.876054 | -2.080320 | 3.122009  |
| H | -2.256937 | -0.521007 | 3.677590  |
| H | -1.369292 | -3.890826 | 2.287778  |
| H | -1.035249 | -2.769028 | 0.964631  |
| H | 0.296551  | -3.548638 | 1.821534  |
| C | -0.305423 | -1.446117 | 5.506923  |
| H | -0.315858 | -1.925885 | 6.491748  |
| H | 0.641888  | -0.900659 | 5.428178  |
| H | -1.117940 | -0.714859 | 5.490616  |
| C | 0.740178  | -3.489924 | 4.503829  |
| H | 0.625213  | -4.354539 | 3.845523  |
| H | 1.693683  | -3.011807 | 4.263501  |
| H | 0.816393  | -3.870170 | 5.528754  |
| C | -2.244587 | -0.182050 | -0.758427 |
| C | -3.526341 | 0.257295  | -0.542619 |
| H | -1.930199 | -1.147973 | -0.380407 |
| H | -3.797829 | 1.263726  | -0.849325 |
| C | -4.517853 | -0.593287 | -0.003083 |
| C | -5.848631 | -0.218270 | 0.374655  |
| C | -6.453796 | 1.008646  | -0.005955 |
| C | -6.641877 | -1.123229 | 1.130465  |
| C | -7.753987 | 1.321631  | 0.388073  |
| H | -5.894004 | 1.724934  | -0.596935 |
| C | -7.940436 | -0.809097 | 1.508875  |
| H | -6.208970 | -2.076236 | 1.423343  |
| C | -8.507142 | 0.422346  | 1.147189  |
| H | -8.185215 | 2.273776  | 0.090720  |
| H | -8.516347 | -1.520486 | 2.094525  |
| H | -9.520191 | 0.670654  | 1.448878  |
| H | -4.195808 | -1.585712 | 0.305898  |
| C | -5.761046 | -0.611068 | -2.945431 |
| C | -7.052089 | -0.157084 | -2.849343 |
| H | -5.044940 | 0.035125  | -3.455589 |
| H | -7.835288 | -0.730175 | -2.363739 |
| H | -7.339070 | 0.799448  | -3.273772 |
| C | -5.230991 | -1.804155 | -2.411589 |
| C | -6.105992 | -2.847118 | -1.779361 |
| H | -5.522073 | -3.511806 | -1.133592 |

|   |           |           |           |
|---|-----------|-----------|-----------|
| H | -6.907415 | -2.412132 | -1.175543 |
| H | -6.581578 | -3.479825 | -2.544862 |
| C | -3.832324 | -2.218000 | -2.758353 |
| H | -3.252883 | -1.409928 | -3.214483 |
| H | -3.281726 | -2.566353 | -1.874426 |
| H | -3.840215 | -3.060739 | -3.466840 |

Vibrational frequencies

|           |          |          |
|-----------|----------|----------|
| -133.4428 | 8.1018   | 14.6291  |
| 17.5026   | 19.2491  | 20.4190  |
| 20.9421   | 23.5133  | 27.2193  |
| 28.2074   | 29.6745  | 34.6235  |
| 40.1637   | 46.9468  | 47.9835  |
| 49.6597   | 56.0471  | 60.7979  |
| 65.8499   | 70.7757  | 76.0463  |
| 88.9691   | 95.2541  | 95.5528  |
| 98.8887   | 99.4952  | 109.6878 |
| 110.9196  | 115.2569 | 118.5949 |

**IV**

|                                              |          |              |
|----------------------------------------------|----------|--------------|
| Zero-point correction=                       | 0.833056 |              |
| Thermal correction to Energy=                | 0.893324 |              |
| Thermal correction to Enthalpy=              | 0.894269 |              |
| Thermal correction to Gibbs Free Energy=     |          | 0.732361     |
| Sum of electronic and zero-point Energies=   |          | -3483.622114 |
| Sum of electronic and thermal Energies=      |          | -3483.561845 |
| Sum of electronic and thermal Enthalpies=    |          | -3483.560901 |
| Sum of electronic and thermal Free Energies= |          | -3483.722809 |

Cartesian coordinates

|   |           |           |           |
|---|-----------|-----------|-----------|
| C | -1.217069 | 1.640774  | -2.988637 |
| C | -0.222040 | 0.891875  | -3.856555 |
| C | 0.867528  | 0.435361  | -2.912355 |
| C | 0.066210  | 0.068321  | -1.651504 |
| N | -1.148686 | 0.924201  | -1.708746 |
| H | -2.215046 | 1.600163  | -3.428932 |
| H | 1.543283  | 1.276151  | -2.736848 |
| H | -0.250107 | -0.977565 | -1.729314 |
| H | -0.911657 | 2.689051  | -2.892263 |
| H | 1.433445  | -0.400699 | -3.322942 |
| F | 0.237524  | 1.635972  | -4.909761 |
| F | -0.846722 | -0.217402 | -4.404331 |
| C | 0.884666  | 0.137464  | -0.304466 |
| C | 1.794110  | -1.103988 | -0.367065 |

|    |           |           |           |
|----|-----------|-----------|-----------|
| C  | 1.326117  | -2.301376 | 0.181177  |
| C  | 2.998075  | -1.125042 | -1.076332 |
| C  | 2.064606  | -3.476217 | 0.064640  |
| H  | 0.379248  | -2.312586 | 0.700372  |
| C  | 3.734711  | -2.307078 | -1.187184 |
| H  | 3.378518  | -0.225489 | -1.545389 |
| C  | 3.281257  | -3.493688 | -0.616826 |
| H  | 3.859561  | -4.406276 | -0.699736 |
| C  | 1.629597  | 1.463899  | -0.096567 |
| C  | 2.909673  | 1.535809  | 0.460867  |
| C  | 0.949434  | 2.662714  | -0.337674 |
| C  | 3.492922  | 2.771306  | 0.749762  |
| H  | 3.463922  | 0.637038  | 0.697125  |
| C  | 1.543194  | 3.890989  | -0.059856 |
| H  | -0.064484 | 2.629601  | -0.712922 |
| C  | 2.821222  | 3.963344  | 0.489346  |
| H  | 3.276704  | 4.919058  | 0.718400  |
| C  | 1.508492  | -4.751270 | 0.633192  |
| C  | 5.005031  | -2.287944 | -1.990768 |
| C  | 0.726361  | 5.131294  | -0.281741 |
| C  | 4.886108  | 2.801390  | 1.313464  |
| F  | 1.469369  | 6.258085  | -0.245616 |
| F  | -0.240852 | 5.261954  | 0.661465  |
| F  | 0.090874  | 5.104576  | -1.479356 |
| F  | 5.125934  | 3.925742  | 2.024340  |
| F  | 5.120820  | 1.748406  | 2.132211  |
| F  | 5.825762  | 2.747643  | 0.336565  |
| F  | 4.753950  | -2.381406 | -3.321116 |
| F  | 5.696880  | -1.137946 | -1.810408 |
| F  | 5.830457  | -3.309252 | -1.673753 |
| F  | 2.480282  | -5.576009 | 1.082775  |
| F  | 0.664372  | -4.521809 | 1.668916  |
| F  | 0.803636  | -5.450023 | -0.293622 |
| O  | -0.075479 | -0.013955 | 0.737349  |
| Si | 0.005848  | 0.242707  | 2.423762  |
| C  | 0.092843  | 2.091759  | 2.774700  |
| H  | -0.619690 | 2.659463  | 2.168558  |
| H  | -0.124071 | 2.300279  | 3.826717  |
| H  | 1.094074  | 2.481026  | 2.564667  |
| C  | 1.546503  | -0.585671 | 3.120560  |
| H  | 2.449306  | -0.183873 | 2.647941  |
| H  | 1.629339  | -0.379986 | 4.193654  |
| H  | 1.550205  | -1.670470 | 2.979332  |
| C  | -1.659111 | -0.525563 | 3.011517  |

|   |           |           |           |
|---|-----------|-----------|-----------|
| C | -1.763325 | -0.801094 | 4.556130  |
| C | -2.784634 | 0.464142  | 2.613464  |
| C | -1.927324 | -1.847190 | 2.251567  |
| H | -2.834072 | -0.999532 | 4.727935  |
| H | -2.768278 | 0.693845  | 1.543262  |
| H | -3.767545 | 0.026407  | 2.838332  |
| H | -2.724560 | 1.415543  | 3.150146  |
| H | -2.849800 | -2.310223 | 2.627355  |
| H | -2.064908 | -1.676659 | 1.181918  |
| H | -1.125569 | -2.582596 | 2.367355  |
| C | -1.388311 | 0.392755  | 5.450826  |
| H | -1.671930 | 0.187272  | 6.489563  |
| H | -0.308036 | 0.579652  | 5.448957  |
| H | -1.891950 | 1.316833  | 5.153789  |
| C | -1.012263 | -2.051069 | 5.047986  |
| H | -1.357747 | -2.967061 | 4.561353  |
| H | 0.067464  | -1.975261 | 4.889441  |
| H | -1.173600 | -2.180265 | 6.124767  |
| C | -2.304085 | 0.342329  | -1.181898 |
| C | -3.593741 | 0.609774  | -1.441788 |
| H | -2.072110 | -0.428331 | -0.460161 |
| H | -3.891337 | 1.384195  | -2.143996 |
| C | -4.684670 | -0.255938 | -0.836514 |
| C | -5.983192 | 0.506475  | -0.640491 |
| C | -6.657990 | 1.084099  | -1.727944 |
| C | -6.546449 | 0.638662  | 0.635919  |
| C | -7.855810 | 1.776038  | -1.542999 |
| H | -6.242122 | 0.992596  | -2.728159 |
| C | -7.745287 | 1.330932  | 0.826077  |
| H | -6.038402 | 0.196420  | 1.489930  |
| C | -8.404776 | 1.902990  | -0.263607 |
| H | -8.361505 | 2.217205  | -2.398248 |
| H | -8.162260 | 1.423346  | 1.825767  |
| H | -9.336790 | 2.442826  | -0.118972 |
| H | -4.347593 | -0.593825 | 0.150213  |
| C | -3.680707 | -2.422742 | -1.729400 |
| C | -4.917360 | -1.562683 | -1.673629 |
| H | -2.946783 | -2.130750 | -2.479298 |
| H | -5.762144 | -2.103947 | -1.234353 |
| H | -5.219047 | -1.279894 | -2.690043 |
| C | -3.358702 | -3.437618 | -0.909414 |
| C | -4.247124 | -3.962361 | 0.190837  |
| H | -3.710040 | -3.962996 | 1.147332  |
| H | -5.167198 | -3.388791 | 0.322726  |

|   |           |           |           |
|---|-----------|-----------|-----------|
| H | -4.525528 | -5.007338 | -0.004971 |
| C | -2.029138 | -4.144696 | -1.015148 |
| H | -1.388243 | -3.716098 | -1.791965 |
| H | -1.491145 | -4.093791 | -0.060926 |
| H | -2.160895 | -5.213736 | -1.232500 |

Vibrational frequencies

|          |          |          |
|----------|----------|----------|
| 10.8074  | 13.2243  | 18.1368  |
| 20.5386  | 24.6510  | 28.4353  |
| 29.6988  | 32.5348  | 33.3528  |
| 33.9239  | 37.4776  | 39.5574  |
| 40.9426  | 45.9276  | 46.8261  |
| 55.8752  | 58.7877  | 64.3836  |
| 68.3930  | 72.9427  | 75.6223  |
| 95.1713  | 96.2231  | 97.3002  |
| 98.7634  | 102.8682 | 108.6410 |
| 112.0894 | 115.3615 | 116.4490 |

**M3(B3LYP)**

|                                              |          |              |
|----------------------------------------------|----------|--------------|
| Zero-point correction=                       | 0.404892 |              |
| Thermal correction to Energy=                | 0.428548 |              |
| Thermal correction to Enthalpy=              | 0.429492 |              |
| Thermal correction to Gibbs Free Energy=     |          | 0.351727     |
| Sum of electronic and zero-point Energies=   |          | -1091.276904 |
| Sum of electronic and thermal Energies=      |          | -1091.253248 |
| Sum of electronic and thermal Enthalpies=    |          | -1091.252304 |
| Sum of electronic and thermal Free Energies= |          | -1091.330070 |

Cartesian coordinates

|   |           |          |           |
|---|-----------|----------|-----------|
| C | -2.086234 | 2.742876 | -0.438982 |
| C | 0.124672  | 2.931077 | 0.417911  |
| C | -0.439905 | 4.307514 | 0.575804  |
| C | -1.962481 | 4.052621 | 0.379568  |
| H | -2.127813 | 2.914924 | -1.517614 |
| H | -2.926972 | 2.118573 | -0.139627 |
| H | -0.202971 | 4.754221 | 1.543040  |
| H | -0.031579 | 4.959793 | -0.204009 |
| H | -2.437676 | 3.914426 | 1.354108  |
| H | -2.457297 | 4.882782 | -0.125643 |
| N | -0.806774 | 2.082310 | -0.120647 |
| N | 1.269597  | 2.327506 | 0.592545  |
| N | 1.036316  | 1.044038 | 0.126483  |
| C | -0.224862 | 0.883843 | -0.316257 |
| C | 2.090888  | 0.061691 | 0.185157  |



|   |           |           |           |
|---|-----------|-----------|-----------|
| C | 3.020194  | 0.022557  | -0.865689 |
| C | 2.165007  | -0.781710 | 1.303158  |
| C | 4.052071  | -0.914745 | -0.774088 |
| C | 3.217600  | -1.702189 | 1.342422  |
| C | 4.163203  | -1.788511 | 0.314617  |
| H | 4.784322  | -0.965047 | -1.575805 |
| H | 3.298077  | -2.365526 | 2.199544  |
| C | 2.900428  | 0.946793  | -2.048335 |
| H | 1.947176  | 0.773037  | -2.558846 |
| H | 2.930981  | 1.998523  | -1.741975 |
| H | 3.714439  | 0.776145  | -2.756864 |
| C | 5.269615  | -2.812763 | 0.366642  |
| H | 4.970778  | -3.736845 | -0.144282 |
| H | 6.174827  | -2.447967 | -0.128166 |
| H | 5.522760  | -3.077766 | 1.397419  |
| C | 1.162251  | -0.704008 | 2.427108  |
| H | 1.056573  | 0.319299  | 2.803591  |
| H | 0.170107  | -1.037928 | 2.102781  |
| H | 1.470615  | -1.340778 | 3.259532  |
| C | -0.764061 | -0.314491 | -1.069523 |
| O | -0.078449 | -0.628730 | -2.076051 |
| C | -1.955934 | -0.917803 | -0.608650 |
| C | -2.537291 | -1.991952 | -1.373279 |
| C | -2.638436 | -0.560530 | 0.607614  |
| C | -3.679854 | -2.620552 | -0.987544 |
| H | -2.030104 | -2.286119 | -2.287728 |
| C | -3.782675 | -1.184682 | 1.006174  |
| H | -2.224626 | 0.216698  | 1.246268  |
| C | -4.394646 | -2.259461 | 0.233027  |
| H | -4.089780 | -3.422635 | -1.597968 |
| H | -4.262287 | -0.889425 | 1.936798  |
| C | -5.544875 | -2.882679 | 0.621534  |
| H | -6.061056 | -2.601678 | 1.535172  |
| H | -5.982924 | -3.681215 | 0.029687  |

Vibrational frequencies

|          |          |          |
|----------|----------|----------|
| 23.3191  | 44.0853  | 51.7882  |
| 58.6735  | 66.9459  | 74.1543  |
| 98.0356  | 101.5420 | 125.8781 |
| 137.0584 | 154.0880 | 163.0012 |
| 168.5152 | 181.3084 | 192.6218 |
| 224.3402 | 234.1611 | 238.7402 |
| 243.8829 | 265.0666 | 278.6422 |
| 286.6631 | 322.1157 | 332.3447 |

|          |          |          |
|----------|----------|----------|
| 363.1689 | 380.8986 | 413.8594 |
| 431.0141 | 456.7295 | 482.9717 |

**ε-TS4(B3LYP)**

|                                              |          |              |
|----------------------------------------------|----------|--------------|
| Zero-point correction=                       | 0.521553 |              |
| Thermal correction to Energy=                | 0.555606 |              |
| Thermal correction to Enthalpy=              | 0.556551 |              |
| Thermal correction to Gibbs Free Energy=     |          | 0.453449     |
| Sum of electronic and zero-point Energies=   |          | -1773.777472 |
| Sum of electronic and thermal Energies=      |          | -1773.743419 |
| Sum of electronic and thermal Enthalpies=    |          | -1773.742475 |
| Sum of electronic and thermal Free Energies= |          | -1773.845576 |

Cartesian coordinates

|   |          |           |           |
|---|----------|-----------|-----------|
| C | 1.094090 | 3.006294  | -0.447716 |
| C | 3.303050 | 2.814460  | 0.415013  |
| C | 2.973678 | 4.262452  | 0.585842  |
| C | 1.429296 | 4.260608  | 0.395946  |
| H | 1.098039 | 3.200490  | -1.523148 |
| H | 0.157684 | 2.523926  | -0.170802 |
| H | 3.287605 | 4.652705  | 1.555495  |
| H | 3.480555 | 4.844372  | -0.191759 |
| H | 0.940860 | 4.180925  | 1.370486  |
| H | 1.072936 | 5.168891  | -0.091035 |
| N | 2.246637 | 2.134505  | -0.131892 |
| N | 4.328488 | 2.024627  | 0.599856  |
| N | 3.890406 | 0.800191  | 0.131371  |
| C | 2.625133 | 0.858609  | -0.316272 |
| C | 4.766706 | -0.346819 | 0.203986  |
| C | 5.677764 | -0.554157 | -0.841612 |
| C | 4.703146 | -1.170426 | 1.340483  |
| C | 6.542398 | -1.647967 | -0.728389 |
| C | 5.587951 | -2.249533 | 1.397407  |
| C | 6.513367 | -2.504012 | 0.376902  |
| H | 7.254298 | -1.833222 | -1.528126 |
| H | 5.556636 | -2.902928 | 2.265613  |
| C | 5.711360 | 0.341094  | -2.052809 |
| H | 4.780646 | 0.239916  | -2.621119 |
| H | 5.820487 | 1.395039  | -1.775604 |
| H | 6.545202 | 0.074443  | -2.706262 |
| C | 7.460658 | -3.673572 | 0.479710  |
| H | 8.064232 | -3.779869 | -0.425504 |
| H | 8.144387 | -3.554401 | 1.328368  |
| H | 6.916294 | -4.611395 | 0.636787  |

|   |           |           |           |
|---|-----------|-----------|-----------|
| C | 3.723228  | -0.913603 | 2.457500  |
| H | 3.779552  | 0.120123  | 2.815079  |
| H | 2.691382  | -1.094481 | 2.135510  |
| H | 3.925979  | -1.574726 | 3.303159  |
| C | 1.869690  | -0.247264 | -1.034706 |
| O | 2.447823  | -0.719252 | -2.024387 |
| C | 0.563317  | -0.591425 | -0.548813 |
| C | -0.265961 | -1.441216 | -1.333018 |
| C | 0.044569  | -0.120317 | 0.691618  |
| C | -1.537235 | -1.764090 | -0.927567 |
| H | 0.124346  | -1.815244 | -2.274557 |
| C | -1.225708 | -0.446494 | 1.100105  |
| H | 0.662780  | 0.492935  | 1.342003  |
| C | -2.084056 | -1.267470 | 0.300979  |
| H | -2.161978 | -2.395078 | -1.551346 |
| H | -1.597410 | -0.073252 | 2.050156  |
| C | -3.436973 | -1.499265 | 0.637594  |
| H | -3.756516 | -1.267481 | 1.649826  |
| H | -3.914411 | -2.371862 | 0.203057  |
| C | -4.603460 | -0.220401 | -0.647266 |
| C | -5.960944 | -0.642086 | -0.105625 |
| C | -6.504624 | -0.221442 | 1.119450  |
| C | -6.716948 | -1.506486 | -0.911695 |
| C | -7.768375 | -0.657134 | 1.520614  |
| H | -5.950476 | 0.449435  | 1.765202  |
| C | -7.975136 | -1.948707 | -0.505987 |
| H | -6.294842 | -1.812262 | -1.863231 |
| C | -8.508207 | -1.524905 | 0.713980  |
| H | -8.174847 | -0.316724 | 2.469343  |
| H | -8.544061 | -2.618677 | -1.145411 |
| H | -9.490296 | -1.864068 | 1.031646  |
| C | -4.091466 | 1.159039  | -0.154918 |
| F | -4.968905 | 2.133900  | -0.529416 |
| F | -2.907159 | 1.472806  | -0.712814 |
| F | -3.936267 | 1.302365  | 1.190602  |
| O | -4.301405 | -0.482875 | -1.834227 |

Vibrational frequencies

|           |          |          |
|-----------|----------|----------|
| -216.1054 | 15.0321  | 20.0476  |
| 25.0559   | 28.1649  | 44.2864  |
| 51.2676   | 54.0927  | 58.7415  |
| 71.2558   | 76.8386  | 77.1794  |
| 83.1766   | 101.6159 | 113.6161 |
| 117.7038  | 130.2072 | 143.5123 |

|          |          |          |
|----------|----------|----------|
| 150.1756 | 158.9930 | 164.3652 |
| 178.2403 | 186.8465 | 195.9782 |
| 218.3219 | 236.1107 | 244.0785 |
| 249.2935 | 260.4995 | 271.3593 |

### M3(M06-2X)

|                                              |          |              |
|----------------------------------------------|----------|--------------|
| Zero-point correction=                       | 0.408747 |              |
| Thermal correction to Energy=                | 0.432202 |              |
| Thermal correction to Enthalpy=              | 0.433146 |              |
| Thermal correction to Gibbs Free Energy=     |          | 0.355696     |
| Sum of electronic and zero-point Energies=   |          | -1090.802522 |
| Sum of electronic and thermal Energies=      |          | -1090.779068 |
| Sum of electronic and thermal Enthalpies=    |          | -1090.778124 |
| Sum of electronic and thermal Free Energies= |          | -1090.855573 |

### Cartesian coordinates

|   |           |           |           |
|---|-----------|-----------|-----------|
| C | 2.136648  | 2.661466  | 0.457257  |
| C | -0.056591 | 2.923811  | -0.411462 |
| C | 0.564707  | 4.273165  | -0.579645 |
| C | 2.069186  | 3.948745  | -0.393653 |
| H | 2.170761  | 2.858854  | 1.530789  |
| H | 2.951773  | 1.994755  | 0.177870  |
| H | 0.340766  | 4.720870  | -1.547886 |
| H | 0.190535  | 4.939030  | 0.203717  |
| H | 2.521880  | 3.756248  | -1.368717 |
| H | 2.609962  | 4.765571  | 0.082901  |
| N | 0.837541  | 2.050948  | 0.141553  |
| N | -1.216160 | 2.357445  | -0.587630 |
| N | -1.030364 | 1.088180  | -0.108085 |
| C | 0.209838  | 0.887072  | 0.341168  |
| C | -2.084784 | 0.112749  | -0.187645 |
| C | -3.031791 | 0.077064  | 0.839081  |
| C | -2.105764 | -0.743010 | -1.288030 |
| C | -4.049766 | -0.865497 | 0.728870  |
| C | -3.147849 | -1.669387 | -1.353163 |
| C | -4.121218 | -1.744258 | -0.357392 |
| H | -4.802128 | -0.923182 | 1.512166  |
| H | -3.192312 | -2.349195 | -2.200057 |
| C | -2.917672 | 1.008451  | 2.011655  |
| H | -1.972584 | 0.817238  | 2.530489  |
| H | -2.923657 | 2.054867  | 1.689501  |
| H | -3.743207 | 0.856470  | 2.709172  |
| C | -5.232870 | -2.756259 | -0.434443 |
| H | -5.149303 | -3.486352 | 0.377068  |

|   |           |           |           |
|---|-----------|-----------|-----------|
| H | -6.209410 | -2.272875 | -0.336058 |
| H | -5.211049 | -3.299326 | -1.381596 |
| C | -1.037932 | -0.679713 | -2.345511 |
| H | -0.896233 | 0.342810  | -2.710441 |
| H | -0.078389 | -1.028950 | -1.946923 |
| H | -1.301491 | -1.314049 | -3.193718 |
| C | 0.685640  | -0.349306 | 1.079969  |
| O | -0.034129 | -0.669578 | 2.045926  |
| C | 1.871769  | -0.946429 | 0.622385  |
| C | 2.440141  | -2.035972 | 1.373183  |
| C | 2.558758  | -0.569884 | -0.585547 |
| C | 3.580630  | -2.656436 | 0.990806  |
| H | 1.920900  | -2.342092 | 2.277463  |
| C | 3.698956  | -1.185635 | -0.985662 |
| H | 2.142004  | 0.215618  | -1.215645 |
| C | 4.306364  | -2.273064 | -0.220144 |
| H | 3.987686  | -3.468805 | 1.588518  |
| H | 4.184920  | -0.883189 | -1.910067 |
| C | 5.452931  | -2.883886 | -0.606119 |
| H | 5.974215  | -2.585524 | -1.510575 |
| H | 5.884280  | -3.690897 | -0.021992 |

Vibrational frequencies

|          |          |          |
|----------|----------|----------|
| 23.8239  | 44.6911  | 45.3187  |
| 57.7212  | 64.3029  | 72.6978  |
| 98.5184  | 101.4988 | 129.5219 |
| 134.1138 | 160.2846 | 165.7912 |
| 173.7998 | 190.7006 | 211.5089 |
| 226.1882 | 233.3596 | 241.5036 |
| 248.5836 | 260.6837 | 278.9301 |
| 296.2540 | 329.8472 | 341.1920 |
| 357.6012 | 385.8718 | 417.8081 |
| 435.4145 | 457.5762 | 482.6005 |

**$\epsilon$ -TS4(M06-2X)**

|                                              |          |              |
|----------------------------------------------|----------|--------------|
| Zero-point correction=                       | 0.528201 |              |
| Thermal correction to Energy=                | 0.561690 |              |
| Thermal correction to Enthalpy=              | 0.562634 |              |
| Thermal correction to Gibbs Free Energy=     |          | 0.461890     |
| Sum of electronic and zero-point Energies=   |          | -1773.060319 |
| Sum of electronic and thermal Energies=      |          | -1773.026830 |
| Sum of electronic and thermal Enthalpies=    |          | -1773.025886 |
| Sum of electronic and thermal Free Energies= |          | -1773.126630 |

Cartesian coordinates

|   |           |           |           |
|---|-----------|-----------|-----------|
| C | 0.888446  | 2.895648  | -0.431040 |
| C | 3.121672  | 2.828326  | 0.368966  |
| C | 2.719425  | 4.259516  | 0.520971  |
| C | 1.177337  | 4.157751  | 0.408147  |
| H | 0.868449  | 3.091661  | -1.505167 |
| H | -0.014530 | 2.361548  | -0.136629 |
| H | 3.055768  | 4.690066  | 1.463894  |
| H | 3.150244  | 4.841483  | -0.299374 |
| H | 0.747616  | 4.029693  | 1.404062  |
| H | 0.737791  | 5.044015  | -0.047961 |
| N | 2.087859  | 2.091864  | -0.136607 |
| N | 4.182847  | 2.089740  | 0.537567  |
| N | 3.790331  | 0.852987  | 0.108197  |
| C | 2.523510  | 0.840889  | -0.304942 |
| C | 4.690342  | -0.268430 | 0.183708  |
| C | 5.608104  | -0.443586 | -0.854813 |
| C | 4.605502  | -1.111158 | 1.291860  |
| C | 6.485727  | -1.518977 | -0.749096 |
| C | 5.503832  | -2.177079 | 1.347514  |
| C | 6.449901  | -2.390152 | 0.344070  |
| H | 7.210076  | -1.685340 | -1.542754 |
| H | 5.461176  | -2.854051 | 2.196828  |
| C | 5.602740  | 0.474314  | -2.044780 |
| H | 4.641173  | 0.396804  | -2.563650 |
| H | 5.742302  | 1.517924  | -1.744994 |
| H | 6.398195  | 0.205766  | -2.741818 |
| C | 7.428995  | -3.529918 | 0.438616  |
| H | 7.568927  | -4.009823 | -0.533615 |
| H | 8.408680  | -3.170118 | 0.770738  |
| H | 7.090011  | -4.284474 | 1.151900  |
| C | 3.572429  | -0.890912 | 2.363327  |
| H | 3.591284  | 0.140448  | 2.730350  |
| H | 2.565449  | -1.091395 | 1.979190  |
| H | 3.749566  | -1.559119 | 3.207734  |
| C | 1.812260  | -0.337294 | -0.944747 |
| O | 2.408822  | -0.859975 | -1.885997 |
| C | 0.523738  | -0.665287 | -0.423922 |
| C | -0.297487 | -1.573296 | -1.145769 |
| C | 0.020838  | -0.140505 | 0.801740  |
| C | -1.549822 | -1.899290 | -0.707610 |
| H | 0.090759  | -1.988122 | -2.071617 |
| C | -1.227900 | -0.467979 | 1.250269  |
| H | 0.643728  | 0.511708  | 1.412385  |

|   |           |           |           |
|---|-----------|-----------|-----------|
| C | -2.090192 | -1.341278 | 0.502254  |
| H | -2.174222 | -2.573951 | -1.284611 |
| H | -1.591915 | -0.062574 | 2.189989  |
| C | -3.419288 | -1.559652 | 0.854032  |
| H | -3.786304 | -1.219165 | 1.817996  |
| H | -3.945002 | -2.398652 | 0.410277  |
| C | -4.441273 | -0.270037 | -0.695906 |
| C | -5.816247 | -0.599271 | -0.174850 |
| C | -6.429207 | 0.058364  | 0.897268  |
| C | -6.509895 | -1.616014 | -0.838412 |
| C | -7.712510 | -0.305373 | 1.297315  |
| H | -5.914740 | 0.854514  | 1.424150  |
| C | -7.786637 | -1.983643 | -0.430407 |
| H | -6.024872 | -2.105905 | -1.676543 |
| C | -8.393427 | -1.328507 | 0.640468  |
| H | -8.182223 | 0.213226  | 2.127605  |
| H | -8.312383 | -2.778699 | -0.950591 |
| H | -9.391898 | -1.611578 | 0.959105  |
| C | -3.840692 | 1.076532  | -0.242007 |
| F | -4.636303 | 2.079774  | -0.677373 |
| F | -2.635543 | 1.271505  | -0.781452 |
| F | -3.716813 | 1.254085  | 1.086028  |
| O | -4.063042 | -0.669839 | -1.800146 |

Vibrational frequencies

|           |          |          |
|-----------|----------|----------|
| -190.1537 | 18.1532  | 23.7019  |
| 28.4297   | 36.3808  | 44.4523  |
| 52.9695   | 56.0722  | 60.1826  |
| 71.7012   | 79.1086  | 102.3313 |
| 107.7235  | 117.2646 | 125.5047 |
| 130.4544  | 138.3444 | 149.0729 |
| 151.6674  | 166.4861 | 171.2125 |
| 184.2187  | 187.5034 | 199.6805 |
| 218.6289  | 239.3033 | 240.3844 |
| 257.0002  | 268.4137 | 276.8438 |

**M3( $\omega$ B97X-D)**

|                                            |          |              |
|--------------------------------------------|----------|--------------|
| Zero-point correction=                     | 0.410337 |              |
| Thermal correction to Energy=              | 0.433579 |              |
| Thermal correction to Enthalpy=            | 0.434523 |              |
| Thermal correction to Gibbs Free Energy=   |          | 0.357574     |
| Sum of electronic and zero-point Energies= |          | -1090.925823 |
| Sum of electronic and thermal Energies=    |          | -1090.902581 |
| Sum of electronic and thermal Enthalpies=  |          | -1090.901637 |

Sum of electronic and thermal Free Energies= -1090.978586

Cartesian coordinates

|   |           |           |           |
|---|-----------|-----------|-----------|
| C | 2.121859  | 2.715256  | 0.476320  |
| C | -0.040180 | 2.923508  | -0.477596 |
| C | 0.576512  | 4.265299  | -0.693118 |
| C | 2.075538  | 3.970702  | -0.422738 |
| H | 2.137821  | 2.950071  | 1.542419  |
| H | 2.941184  | 2.038092  | 0.238600  |
| H | 0.393557  | 4.655451  | -1.694459 |
| H | 0.162171  | 4.973241  | 0.031015  |
| H | 2.580175  | 3.755519  | -1.367233 |
| H | 2.578998  | 4.813571  | 0.049712  |
| N | 0.835395  | 2.091228  | 0.156238  |
| N | -1.184883 | 2.336332  | -0.678956 |
| N | -1.004304 | 1.087903  | -0.133812 |
| C | 0.216359  | 0.928380  | 0.379744  |
| C | -2.050557 | 0.106376  | -0.200911 |
| C | -3.012780 | 0.098101  | 0.811015  |
| C | -2.059345 | -0.781681 | -1.278328 |
| C | -4.030671 | -0.847493 | 0.713493  |
| C | -3.099217 | -1.707923 | -1.329576 |
| C | -4.088127 | -1.755498 | -0.345813 |
| H | -4.794178 | -0.878217 | 1.486256  |
| H | -3.133026 | -2.413569 | -2.155384 |
| C | -2.921475 | 1.057473  | 1.963523  |
| H | -1.985626 | 0.882857  | 2.505016  |
| H | -2.925990 | 2.096935  | 1.619034  |
| H | -3.757406 | 0.920816  | 2.652501  |
| C | -5.182129 | -2.787895 | -0.411312 |
| H | -4.877872 | -3.704129 | 0.107105  |
| H | -6.097410 | -2.428092 | 0.066266  |
| H | -5.413336 | -3.056047 | -1.445707 |
| C | -0.980450 | -0.753785 | -2.325873 |
| H | -0.829368 | 0.254909  | -2.723394 |
| H | -0.027084 | -1.094660 | -1.907170 |
| H | -1.235505 | -1.413443 | -3.157760 |
| C | 0.709345  | -0.268427 | 1.169783  |
| O | 0.044673  | -0.511382 | 2.197264  |
| C | 1.849221  | -0.921990 | 0.677904  |
| C | 2.424717  | -2.006484 | 1.430825  |
| C | 2.492504  | -0.597308 | -0.569247 |
| C | 3.525732  | -2.671541 | 1.011619  |
| H | 1.944751  | -2.277169 | 2.367200  |



|   |          |           |           |
|---|----------|-----------|-----------|
| C | 3.594247 | -1.255158 | -1.004526 |
| H | 2.077898 | 0.188624  | -1.198561 |
| C | 4.205537 | -2.342055 | -0.241258 |
| H | 3.933823 | -3.480950 | 1.612640  |
| H | 4.046314 | -0.984846 | -1.955725 |
| C | 5.314480 | -2.996874 | -0.663248 |
| H | 5.802734 | -2.738574 | -1.598955 |
| H | 5.749832 | -3.803456 | -0.079926 |

Vibrational frequencies

|          |          |          |
|----------|----------|----------|
| 19.0345  | 44.9866  | 47.5597  |
| 59.6144  | 69.1500  | 76.2633  |
| 93.8800  | 114.2605 | 138.8782 |
| 149.0524 | 164.4210 | 168.2379 |
| 183.7860 | 193.6735 | 208.6151 |
| 226.8284 | 241.4199 | 246.0626 |
| 253.7990 | 263.5512 | 286.6489 |
| 295.2940 | 332.4495 | 342.4282 |
| 365.2003 | 390.1403 | 420.7070 |
| 433.3462 | 452.6360 | 489.3525 |

**$\epsilon$ -TS4( $\omega$ B97X-D)**

|                                              |          |              |
|----------------------------------------------|----------|--------------|
| Zero-point correction=                       | 0.528878 |              |
| Thermal correction to Energy=                | 0.562240 |              |
| Thermal correction to Enthalpy=              | 0.563184 |              |
| Thermal correction to Gibbs Free Energy=     |          | 0.462997     |
| Sum of electronic and zero-point Energies=   |          | -1773.230567 |
| Sum of electronic and thermal Energies=      |          | -1773.197205 |
| Sum of electronic and thermal Enthalpies=    |          | -1773.196261 |
| Sum of electronic and thermal Free Energies= |          | -1773.296448 |

Cartesian coordinates

|   |           |          |           |
|---|-----------|----------|-----------|
| C | 0.869456  | 2.863828 | -0.438947 |
| C | 3.087587  | 2.809344 | 0.396643  |
| C | 2.674381  | 4.232215 | 0.564919  |
| C | 1.135833  | 4.128486 | 0.405006  |
| H | 0.845102  | 3.061169 | -1.512411 |
| H | -0.028261 | 2.320691 | -0.147807 |
| H | 2.980388  | 4.647365 | 1.525081  |
| H | 3.127073  | 4.833459 | -0.229357 |
| H | 0.673891  | 4.006787 | 1.387477  |
| H | 0.710721  | 5.013762 | -0.066689 |
| N | 2.072648  | 2.074713 | -0.142765 |
| N | 4.150683  | 2.078248 | 0.579805  |

|   |           |           |           |
|---|-----------|-----------|-----------|
| N | 3.775894  | 0.841708  | 0.121413  |
| C | 2.519599  | 0.829279  | -0.321489 |
| C | 4.691027  | -0.263810 | 0.191207  |
| C | 5.619446  | -0.412026 | -0.840171 |
| C | 4.618229  | -1.119912 | 1.292984  |
| C | 6.520154  | -1.470316 | -0.737082 |
| C | 5.538302  | -2.163664 | 1.346359  |
| C | 6.497594  | -2.347862 | 0.347754  |
| H | 7.254558  | -1.612419 | -1.525450 |
| H | 5.507295  | -2.849275 | 2.189132  |
| C | 5.615191  | 0.516168  | -2.022405 |
| H | 4.655411  | 0.445802  | -2.544844 |
| H | 5.756392  | 1.557406  | -1.714844 |
| H | 6.410688  | 0.254946  | -2.722780 |
| C | 7.502421  | -3.463418 | 0.459556  |
| H | 7.031315  | -4.387029 | 0.807633  |
| H | 7.986759  | -3.662300 | -0.499581 |
| H | 8.284371  | -3.203621 | 1.181615  |
| C | 3.575196  | -0.934829 | 2.361337  |
| H | 3.576190  | 0.088273  | 2.751109  |
| H | 2.573769  | -1.141125 | 1.967987  |
| H | 3.753640  | -1.616870 | 3.194824  |
| C | 1.815582  | -0.324605 | -1.011425 |
| O | 2.393258  | -0.770719 | -2.004593 |
| C | 0.550020  | -0.709362 | -0.480165 |
| C | -0.279797 | -1.588783 | -1.227380 |
| C | 0.057391  | -0.235604 | 0.769852  |
| C | -1.528718 | -1.927640 | -0.791874 |
| H | 0.095595  | -1.971777 | -2.171659 |
| C | -1.186505 | -0.577850 | 1.215792  |
| H | 0.682302  | 0.395460  | 1.398469  |
| C | -2.062274 | -1.409242 | 0.437470  |
| H | -2.156269 | -2.578947 | -1.391090 |
| H | -1.540465 | -0.203377 | 2.171610  |
| C | -3.394448 | -1.620162 | 0.785508  |
| H | -3.742765 | -1.329659 | 1.772538  |
| H | -3.930919 | -2.438560 | 0.316511  |
| C | -4.458194 | -0.221763 | -0.679958 |
| C | -5.826268 | -0.591992 | -0.158913 |
| C | -6.380230 | -0.096624 | 1.026449  |
| C | -6.577827 | -1.473361 | -0.940634 |
| C | -7.660397 | -0.478009 | 1.415290  |
| H | -5.817816 | 0.584182  | 1.654113  |
| C | -7.853652 | -1.860209 | -0.546464 |

|   |           |           |           |
|---|-----------|-----------|-----------|
| H | -6.140901 | -1.843476 | -1.862055 |
| C | -8.401173 | -1.361621 | 0.633725  |
| H | -8.080641 | -0.081902 | 2.334887  |
| H | -8.425662 | -2.545438 | -1.164940 |
| H | -9.399488 | -1.657606 | 0.941536  |
| C | -3.860893 | 1.115708  | -0.172915 |
| F | -4.673872 | 2.128813  | -0.559929 |
| F | -2.664920 | 1.346815  | -0.722164 |
| F | -3.715533 | 1.247423  | 1.160876  |
| O | -4.099521 | -0.555560 | -1.812836 |

Vibrational frequencies

|           |          |          |
|-----------|----------|----------|
| -259.2965 | 18.2919  | 27.3252  |
| 33.7693   | 36.0628  | 49.8671  |
| 50.9878   | 58.4193  | 62.2073  |
| 73.9993   | 76.1543  | 83.2800  |
| 99.5571   | 114.9957 | 125.8479 |
| 138.9500  | 148.2431 | 152.1237 |
| 170.5186  | 172.9287 | 181.1820 |
| 187.7141  | 190.8452 | 203.6155 |
| 215.7740  | 242.1188 | 243.5058 |
| 245.6184  | 260.6412 | 274.5577 |

$\epsilon$ -TS4 $_{\Phi = -60^\circ}$

|                                              |          |              |
|----------------------------------------------|----------|--------------|
| Zero-point correction=                       | 0.522397 |              |
| Thermal correction to Energy=                | 0.556182 |              |
| Thermal correction to Enthalpy=              | 0.557126 |              |
| Thermal correction to Gibbs Free Energy=     |          | 0.455034     |
| Sum of electronic and zero-point Energies=   |          | -1773.856514 |
| Sum of electronic and thermal Energies=      |          | -1773.822730 |
| Sum of electronic and thermal Enthalpies=    |          | -1773.821785 |
| Sum of electronic and thermal Free Energies= |          | -1773.923878 |

Cartesian coordinates

|   |           |          |           |
|---|-----------|----------|-----------|
| C | 0.648336  | 2.647858 | -0.498167 |
| C | 2.874563  | 2.806412 | 0.330617  |
| C | 2.340000  | 4.197287 | 0.451738  |
| C | 0.808545  | 3.959089 | 0.308057  |
| H | 0.618122  | 2.810121 | -1.578344 |
| H | -0.206242 | 2.043290 | -0.198477 |
| H | 2.615691  | 4.675174 | 1.393125  |
| H | 2.735115  | 4.808380 | -0.367212 |
| H | 0.365757  | 3.826477 | 1.298679  |
| H | 0.305189  | 4.791183 | -0.184793 |

|   |           |           |           |
|---|-----------|-----------|-----------|
| N | 1.917925  | 1.965244  | -0.174354 |
| N | 4.003982  | 2.173981  | 0.524585  |
| N | 3.732413  | 0.885930  | 0.105676  |
| C | 2.470009  | 0.750865  | -0.322244 |
| C | 4.735513  | -0.143086 | 0.202871  |
| C | 5.642820  | -0.277709 | -0.855003 |
| C | 4.760993  | -0.944676 | 1.352160  |
| C | 6.618300  | -1.270862 | -0.734384 |
| C | 5.754021  | -1.925028 | 1.420182  |
| C | 6.685243  | -2.103742 | 0.388946  |
| H | 7.335589  | -1.400907 | -1.540333 |
| H | 5.801046  | -2.562643 | 2.299038  |
| C | 5.539346  | 0.598920  | -2.074087 |
| H | 4.586183  | 0.414773  | -2.582342 |
| H | 5.573988  | 1.661050  | -1.808028 |
| H | 6.351976  | 0.393302  | -2.774241 |
| C | 7.719214  | -3.197850 | 0.476729  |
| H | 8.083833  | -3.322074 | 1.501210  |
| H | 7.290609  | -4.158822 | 0.166045  |
| H | 8.575770  | -2.995023 | -0.172431 |
| C | 3.758855  | -0.756397 | 2.462104  |
| H | 3.739062  | 0.281920  | 2.810925  |
| H | 2.745231  | -1.006288 | 2.128287  |
| H | 3.997360  | -1.397530 | 3.313548  |
| C | 1.854845  | -0.476155 | -0.962494 |
| O | 2.484573  | -0.963257 | -1.910497 |
| C | 0.571156  | -0.878810 | -0.458882 |
| C | -0.251703 | -1.731924 | -1.241926 |
| C | 0.062579  | -0.415839 | 0.787672  |
| C | -1.530636 | -2.038590 | -0.843890 |
| H | 0.138334  | -2.100295 | -2.185999 |
| C | -1.207295 | -0.739849 | 1.196030  |
| H | 0.684634  | 0.194737  | 1.436546  |
| C | -2.075161 | -1.526225 | 0.376875  |
| H | -2.167056 | -2.647445 | -1.476998 |
| H | -1.581509 | -0.366950 | 2.144455  |
| C | -3.453285 | -1.667453 | 0.669594  |
| H | -3.790162 | -1.407430 | 1.669492  |
| H | -3.976384 | -2.508353 | 0.224030  |
| C | -4.406418 | -0.318540 | -0.640686 |
| C | -5.814792 | -0.568050 | -0.122134 |
| C | -6.322383 | -0.063073 | 1.085766  |
| C | -6.647095 | -1.367631 | -0.918211 |
| C | -7.629867 | -0.350598 | 1.479439  |

|   |           |           |           |
|---|-----------|-----------|-----------|
| H | -5.701542 | 0.554652  | 1.723492  |
| C | -7.950291 | -1.662658 | -0.520042 |
| H | -6.246345 | -1.743504 | -1.853685 |
| C | -8.449406 | -1.153638 | 0.681811  |
| H | -8.008382 | 0.052533  | 2.415072  |
| H | -8.579747 | -2.285224 | -1.150596 |
| H | -9.465641 | -1.378819 | 0.993210  |
| C | -3.770303 | 1.017409  | -0.164749 |
| F | -4.553691 | 2.066172  | -0.545983 |
| F | -2.561097 | 1.215679  | -0.729971 |
| F | -3.595852 | 1.157901  | 1.179557  |
| O | -4.111972 | -0.631353 | -1.820704 |

Vibrational frequencies

|           |          |          |
|-----------|----------|----------|
| -179.4986 | 14.4626  | 23.5150  |
| 24.5982   | 30.4806  | 40.9920  |
| 43.6609   | 55.3277  | 61.5258  |
| 70.3618   | 80.1812  | 87.8031  |
| 92.3138   | 107.2997 | 125.0842 |
| 130.7828  | 141.2616 | 147.8949 |
| 154.5491  | 168.0339 | 174.8062 |
| 179.7113  | 191.5662 | 198.1758 |
| 219.1446  | 237.7376 | 238.7983 |
| 253.2946  | 266.2868 | 275.2007 |

$\epsilon$ -TS4 $_{\Phi=171^\circ}$

|                                              |          |              |
|----------------------------------------------|----------|--------------|
| Zero-point correction=                       | 0.522369 |              |
| Thermal correction to Energy=                | 0.556136 |              |
| Thermal correction to Enthalpy=              | 0.557080 |              |
| Thermal correction to Gibbs Free Energy=     | 0.455696 |              |
| Sum of electronic and zero-point Energies=   |          | -1773.858465 |
| Sum of electronic and thermal Energies=      |          | -1773.824698 |
| Sum of electronic and thermal Enthalpies=    |          | -1773.823754 |
| Sum of electronic and thermal Free Energies= |          | -1773.925138 |

Cartesian coordinates

|   |           |          |           |
|---|-----------|----------|-----------|
| C | 0.347814  | 2.788429 | 0.183866  |
| C | 2.598173  | 2.755842 | 0.955987  |
| C | 2.087079  | 4.091844 | 1.386985  |
| C | 0.548573  | 3.899432 | 1.243278  |
| H | 0.282993  | 3.173019 | -0.836900 |
| H | -0.499290 | 2.133639 | 0.380775  |
| H | 2.396886  | 4.351048 | 2.400672  |
| H | 2.467901  | 4.861720 | 0.706927  |

|   |           |           |           |
|---|-----------|-----------|-----------|
| H | 0.133627  | 3.562127  | 2.196603  |
| H | 0.041092  | 4.820041  | 0.953890  |
| N | 1.616598  | 2.046524  | 0.315350  |
| N | 3.720292  | 2.083246  | 0.988297  |
| N | 3.417915  | 0.911820  | 0.320904  |
| C | 2.143262  | 0.881857  | -0.089943 |
| C | 4.403156  | -0.131597 | 0.194826  |
| C | 5.268165  | -0.099577 | -0.906301 |
| C | 4.460215  | -1.110403 | 1.196018  |
| C | 6.229354  | -1.110222 | -0.988584 |
| C | 5.441335  | -2.096738 | 1.066238  |
| C | 6.330717  | -2.112123 | -0.015319 |
| H | 6.915794  | -1.112833 | -1.831036 |
| H | 5.512532  | -2.868361 | 1.828272  |
| C | 5.139438  | 0.965312  | -1.962479 |
| H | 4.182545  | 0.854613  | -2.483817 |
| H | 5.166323  | 1.969586  | -1.525840 |
| H | 5.945475  | 0.889231  | -2.695852 |
| C | 7.360106  | -3.206666 | -0.144112 |
| H | 7.688273  | -3.565249 | 0.836144  |
| H | 6.944292  | -4.066920 | -0.683503 |
| H | 8.239419  | -2.867071 | -0.699276 |
| C | 3.493761  | -1.099718 | 2.352490  |
| H | 3.506400  | -0.136649 | 2.874662  |
| H | 2.466904  | -1.271204 | 2.008416  |
| H | 3.741250  | -1.882223 | 3.072870  |
| C | 1.492431  | -0.198345 | -0.929260 |
| O | 2.063750  | -0.469477 | -1.993216 |
| C | 0.261091  | -0.750982 | -0.436167 |
| C | -0.539080 | -1.540757 | -1.306019 |
| C | -0.206342 | -0.530699 | 0.887823  |
| C | -1.752435 | -2.031389 | -0.891924 |
| H | -0.181924 | -1.721425 | -2.315041 |
| C | -1.407880 | -1.050740 | 1.313486  |
| H | 0.395342  | 0.042562  | 1.588220  |
| C | -2.247487 | -1.794097 | 0.429205  |
| H | -2.370430 | -2.597189 | -1.582989 |
| H | -1.757035 | -0.862557 | 2.322367  |
| C | -3.576535 | -2.118782 | 0.794877  |
| H | -3.800873 | -2.237156 | 1.850303  |
| H | -4.131389 | -2.779635 | 0.134204  |
| C | -4.496443 | -0.226944 | 0.736959  |
| C | -4.128265 | 0.247076  | -0.658224 |
| C | -4.568925 | -0.332544 | -1.858120 |

|   |           |           |           |
|---|-----------|-----------|-----------|
| C | -3.220854 | 1.314235  | -0.726417 |
| C | -4.116057 | 0.150364  | -3.087207 |
| H | -5.259019 | -1.166662 | -1.840369 |
| C | -2.759823 | 1.789938  | -1.953377 |
| H | -2.891595 | 1.751674  | 0.209422  |
| C | -3.207225 | 1.210151  | -3.142613 |
| H | -4.470954 | -0.309376 | -4.005792 |
| H | -2.054445 | 2.616664  | -1.982557 |
| H | -2.851498 | 1.576891  | -4.101470 |
| C | -5.936489 | -0.766506 | 0.912151  |
| F | -6.826440 | 0.254645  | 0.772844  |
| F | -6.120307 | -1.280254 | 2.146468  |
| F | -6.336115 | -1.729701 | 0.035175  |
| O | -4.081431 | 0.423782  | 1.731930  |

Vibrational frequencies

|           |          |          |
|-----------|----------|----------|
| -199.6094 | 20.8895  | 22.2046  |
| 26.9884   | 34.8465  | 47.4643  |
| 52.5459   | 59.3487  | 63.7129  |
| 68.0601   | 72.0532  | 88.8829  |
| 95.9522   | 101.5843 | 115.5955 |
| 130.8107  | 138.5410 | 140.9273 |
| 154.0328  | 165.7684 | 170.2123 |
| 177.3400  | 196.1382 | 201.8186 |
| 232.9715  | 234.9741 | 241.6708 |
| 245.7840  | 259.5437 | 276.7013 |

$\epsilon$ -TS4 <sub>$\Phi = -161^\circ$</sub>

|                                              |          |              |
|----------------------------------------------|----------|--------------|
| Zero-point correction=                       | 0.522944 |              |
| Thermal correction to Energy=                | 0.556420 |              |
| Thermal correction to Enthalpy=              | 0.557364 |              |
| Thermal correction to Gibbs Free Energy=     |          | 0.456418     |
| Sum of electronic and zero-point Energies=   |          | -1773.857488 |
| Sum of electronic and thermal Energies=      |          | -1773.824013 |
| Sum of electronic and thermal Enthalpies=    |          | -1773.823069 |
| Sum of electronic and thermal Free Energies= |          | -1773.924014 |

Cartesian coordinates

|   |           |          |           |
|---|-----------|----------|-----------|
| C | -0.089267 | 1.814086 | -1.249159 |
| C | 2.170899  | 2.552471 | -1.100399 |
| C | 1.437352  | 3.735812 | -1.641560 |
| C | -0.038908 | 3.358913 | -1.327070 |
| H | -0.286855 | 1.343616 | -2.215654 |
| H | -0.796041 | 1.438434 | -0.507885 |

|   |           |           |           |
|---|-----------|-----------|-----------|
| H | 1.752743  | 4.673474  | -1.181102 |
| H | 1.621142  | 3.807584  | -2.719393 |
| H | -0.322111 | 3.772486  | -0.355662 |
| H | -0.733211 | 3.739634  | -2.076544 |
| N | 1.312878  | 1.508784  | -0.877083 |
| N | 3.407196  | 2.217046  | -0.827611 |
| N | 3.308262  | 0.896767  | -0.438610 |
| C | 2.042938  | 0.458645  | -0.465572 |
| C | 4.476216  | 0.175839  | -0.001387 |
| C | 5.263259  | -0.458551 | -0.970920 |
| C | 4.773334  | 0.162732  | 1.367385  |
| C | 6.406643  | -1.124645 | -0.524444 |
| C | 5.927605  | -0.520332 | 1.760901  |
| C | 6.753000  | -1.166009 | 0.832325  |
| H | 7.038536  | -1.625778 | -1.252924 |
| H | 6.186001  | -0.546758 | 2.816150  |
| C | 4.863269  | -0.443716 | -2.421975 |
| H | 3.908898  | -0.967046 | -2.547277 |
| H | 4.733901  | 0.578481  | -2.793800 |
| H | 5.614595  | -0.940793 | -3.039582 |
| C | 7.976077  | -1.923114 | 1.285682  |
| H | 8.758798  | -1.912328 | 0.521250  |
| H | 8.389406  | -1.505440 | 2.208474  |
| H | 7.728573  | -2.973499 | 1.484267  |
| C | 3.870995  | 0.837365  | 2.368790  |
| H | 3.659598  | 1.874152  | 2.085672  |
| H | 2.909314  | 0.315300  | 2.441090  |
| H | 4.324946  | 0.840451  | 3.362108  |
| C | 1.561238  | -0.957516 | -0.223879 |
| O | 2.163662  | -1.855231 | -0.818933 |
| C | 0.366194  | -1.070270 | 0.573353  |
| C | -0.494526 | -2.183937 | 0.395596  |
| C | -0.046656 | -0.025355 | 1.437877  |
| C | -1.754314 | -2.184082 | 0.951143  |
| H | -0.168387 | -2.996869 | -0.245786 |
| C | -1.292275 | -0.044163 | 2.020529  |
| H | 0.619276  | 0.811109  | 1.632527  |
| C | -2.219529 | -1.087227 | 1.736442  |
| H | -2.436224 | -3.003755 | 0.743363  |
| H | -1.606333 | 0.775888  | 2.656707  |
| C | -3.596976 | -0.884271 | 2.016786  |
| H | -3.833034 | -0.222107 | 2.846632  |
| H | -4.268648 | -1.732620 | 1.918135  |
| C | -4.068208 | 0.389723  | 0.460554  |



|   |           |           |           |
|---|-----------|-----------|-----------|
| C | -4.259368 | -0.632187 | -0.651491 |
| C | -5.316295 | -1.555013 | -0.728683 |
| C | -3.272965 | -0.668881 | -1.646780 |
| C | -5.381089 | -2.476414 | -1.774214 |
| H | -6.092448 | -1.559400 | 0.026391  |
| C | -3.331803 | -1.595338 | -2.688249 |
| H | -2.465111 | 0.050480  | -1.583460 |
| C | -4.388108 | -2.505326 | -2.757878 |
| H | -6.209981 | -3.178111 | -1.818003 |
| H | -2.552189 | -1.606774 | -3.445869 |
| H | -4.438953 | -3.229065 | -3.566692 |
| C | -5.373486 | 0.930854  | 1.091896  |
| F | -6.093205 | 1.623377  | 0.166192  |
| F | -5.108229 | 1.788921  | 2.100948  |
| F | -6.226590 | -0.001642 | 1.604551  |
| O | -3.185387 | 1.288308  | 0.320330  |

Vibrational frequencies

|           |          |          |
|-----------|----------|----------|
| -232.9772 | 14.1141  | 19.7342  |
| 24.8664   | 36.7493  | 44.1601  |
| 49.5716   | 60.1634  | 63.6183  |
| 72.8482   | 80.3318  | 95.0336  |
| 96.3667   | 109.9364 | 122.8223 |
| 136.5296  | 145.9174 | 158.4598 |
| 169.4576  | 176.4202 | 187.0741 |
| 188.8480  | 190.8765 | 206.4174 |
| 234.1932  | 239.0156 | 243.8507 |
| 250.5566  | 266.6202 | 275.5504 |

$\epsilon$ -TS4 <sub>$\Phi = 78^\circ$</sub>

|                                              |          |              |
|----------------------------------------------|----------|--------------|
| Zero-point correction=                       | 0.523106 |              |
| Thermal correction to Energy=                | 0.556573 |              |
| Thermal correction to Enthalpy=              | 0.557517 |              |
| Thermal correction to Gibbs Free Energy=     |          | 0.457047     |
| Sum of electronic and zero-point Energies=   |          | -1773.857297 |
| Sum of electronic and thermal Energies=      |          | -1773.823830 |
| Sum of electronic and thermal Enthalpies=    |          | -1773.822886 |
| Sum of electronic and thermal Free Energies= |          | -1773.923357 |

Cartesian coordinates

|   |          |          |           |
|---|----------|----------|-----------|
| C | 0.329513 | 2.617118 | -0.949559 |
| C | 2.556926 | 2.873968 | -0.152232 |
| C | 2.015927 | 4.267356 | -0.183233 |
| C | 0.484265 | 4.005957 | -0.285020 |

|   |           |           |           |
|---|-----------|-----------|-----------|
| H | 0.290356  | 2.663881  | -2.040739 |
| H | -0.515852 | 2.042320  | -0.577112 |
| H | 2.298510  | 4.845978  | 0.697720  |
| H | 2.397764  | 4.786857  | -1.068849 |
| H | 0.051558  | 3.970445  | 0.718403  |
| H | -0.030390 | 4.779871  | -0.855041 |
| N | 1.601381  | 1.980404  | -0.559341 |
| N | 3.678785  | 2.265151  | 0.135856  |
| N | 3.404029  | 0.935713  | -0.123228 |
| C | 2.144606  | 0.755278  | -0.543380 |
| C | 4.388496  | -0.083411 | 0.137712  |
| C | 5.301437  | -0.401713 | -0.875617 |
| C | 4.376972  | -0.705665 | 1.392994  |
| C | 6.242676  | -1.394642 | -0.593342 |
| C | 5.338421  | -1.693429 | 1.622559  |
| C | 6.275884  | -2.048387 | 0.645007  |
| H | 6.960394  | -1.669234 | -1.361690 |
| H | 5.352089  | -2.198774 | 2.584527  |
| C | 5.232305  | 0.273675  | -2.219083 |
| H | 4.302844  | -0.008953 | -2.725874 |
| H | 5.238668  | 1.364523  | -2.120242 |
| H | 6.075204  | -0.018759 | -2.849463 |
| C | 7.319226  | -3.099556 | 0.928994  |
| H | 8.224570  | -2.644334 | 1.349945  |
| H | 6.957727  | -3.836358 | 1.652469  |
| H | 7.614182  | -3.627182 | 0.017092  |
| C | 3.354211  | -0.335995 | 2.435933  |
| H | 3.329477  | 0.746111  | 2.604871  |
| H | 2.348256  | -0.641704 | 2.124893  |
| H | 3.573739  | -0.825412 | 3.387323  |
| C | 1.528761  | -0.548146 | -1.008528 |
| O | 2.144232  | -1.145124 | -1.900955 |
| C | 0.280496  | -0.929446 | -0.405272 |
| C | -0.459094 | -2.009613 | -0.959705 |
| C | -0.251999 | -0.275037 | 0.738202  |
| C | -1.671637 | -2.380520 | -0.431451 |
| H | -0.048138 | -2.527277 | -1.820858 |
| C | -1.459903 | -0.657184 | 1.273592  |
| H | 0.303195  | 0.525898  | 1.217929  |
| C | -2.230818 | -1.716408 | 0.705315  |
| H | -2.233368 | -3.190986 | -0.885386 |
| H | -1.849629 | -0.140412 | 2.145174  |
| C | -3.528944 | -2.022916 | 1.205227  |
| H | -3.729874 | -1.724971 | 2.229843  |

|   |           |           |           |
|---|-----------|-----------|-----------|
| H | -3.943119 | -2.993255 | 0.942188  |
| C | -5.093575 | -0.875649 | 0.536921  |
| C | -4.464586 | 0.509289  | 0.523184  |
| C | -4.612364 | 1.269545  | 1.693358  |
| C | -3.765403 | 1.073634  | -0.554452 |
| C | -4.070569 | 2.549540  | 1.794928  |
| H | -5.171891 | 0.831965  | 2.513549  |
| C | -3.248395 | 2.369299  | -0.463953 |
| H | -3.627095 | 0.518202  | -1.473204 |
| C | -3.388628 | 3.110846  | 0.710681  |
| H | -4.193740 | 3.116547  | 2.714021  |
| H | -2.737199 | 2.799525  | -1.321274 |
| H | -2.982369 | 4.116464  | 0.777308  |
| C | -5.297434 | -1.532488 | -0.849812 |
| F | -6.207562 | -0.820073 | -1.570936 |
| F | -5.785110 | -2.784469 | -0.732285 |
| F | -4.190435 | -1.627165 | -1.638206 |
| O | -6.038972 | -1.109411 | 1.338767  |

Vibrational frequencies

|           |          |          |
|-----------|----------|----------|
| -240.3751 | 18.3848  | 21.9100  |
| 25.3522   | 36.4228  | 45.0557  |
| 52.4849   | 59.4576  | 67.6433  |
| 73.9533   | 83.5275  | 91.3633  |
| 98.5074   | 110.8472 | 127.8595 |
| 137.3693  | 144.2453 | 151.1977 |
| 167.6057  | 176.5521 | 182.6805 |
| 190.4146  | 200.1282 | 230.7477 |
| 235.9226  | 239.0718 | 245.9702 |
| 249.0235  | 260.5872 | 267.2507 |
